# Supplementary material for: Comparative transcriptomic analyses of powdery mildew resistant and susceptible cultivated cucumber ( Cucumis sativus L.) varieties to identify the genes involved in the resistance to Sphaerotheca fuliginea infection
Source: PeerJ journal article supplement (doi:10.7717/peerj.8250), 2020-04-17
Supplement: Table_S1.xlsx [file Table_S1.xlsx]

## Sheet: Sheet1
Table S1 The detailed information of the obtained reads from different sample groups.
Samples	Group	Clean reads	Clean bases	GC Content	%≥Q30
ST-1	ST	23810915	5993862537	0.455	0.9575
ST-2	ST	22072732	5559251858	0.4564	0.9576
ST-3	ST	24782485	6238700020	0.4571	0.9574
RT-1	RT	24615971	6195056686	0.4557	0.9584
RT-2	RT	23484286	5912104085	0.4554	0.9577
RT-3	RT	21565692	5430357869	0.4551	0.9577
SC-1	SC	24830105	6247941380	0.4465	0.9573
SC-2	SC	22482178	5655987381	0.4465	0.9548
SC-3	SC	23128414	6906866246	0.4074	0.9044
RC-1	RC	21668790	6472539148	0.4434	0.9127
RC-2	RC	23412355	5890804338	0.4578	0.9549
RC-3	RC	25070069	6313321800	0.449	0.9561
