# Supplementary material for: Comparative transcriptomic analyses of powdery mildew resistant and susceptible cultivated cucumber ( Cucumis sativus L.) varieties to identify the genes involved in the resistance to Sphaerotheca fuliginea infection
Source: PeerJ journal article supplement (doi:10.7717/peerj.8250), 2020-04-17
Supplement: Table_S2.xlsx [file Table_S2.xlsx]

## Sheet: Sheet1
Table S2 Percentages of the reads mapped onto the reference genome.
BMK-ID	Total Reads	Mapped Reads	Uniq Mapped Reads	Multiple Map Reads
ST-1	47621830	42,495,835 (89.24%)	41,591,083 (87.34%)	904,752 (1.90%)
ST-2	44145464	39,614,602 (89.74%)	38,785,117 (87.86%)	829,485 (1.88%)
ST-3	49564970	44,339,452 (89.46%)	43,365,290 (87.49%)	974,162 (1.97%)
RT-1	49231942	43,579,270 (88.52%)	42,800,194 (86.94%)	779,076 (1.58%)
RT-2	46968572	41,768,814 (88.93%)	41,042,070 (87.38%)	726,744 (1.55%)
RT-3	43131384	38,460,863 (89.17%)	37,670,642 (87.34%)	790,221 (1.83%)
SC-1	49660210	44,362,841 (89.33%)	43,744,434 (88.09%)	618,407 (1.25%)
SC-2	44964356	39,691,740 (88.27%)	39,103,441 (86.97%)	588,299 (1.31%)
SC-3	46256828	36,506,049 (78.92%)	35,704,000 (77.19%)	802,049 (1.73%)
RC-1	43337580	34,753,456 (80.19%)	33,660,772 (77.67%)	1,092,684 (2.52%)
RC-2	46824710	40,959,100 (87.47%)	40,031,770 (85.49%)	927,330 (1.98%)
RC-3	50140138	45,367,243 (90.48%)	44,583,729 (88.92%)	783,514 (1.56%)
