# Supplementary material for: Comparative transcriptomic analyses of powdery mildew resistant and susceptible cultivated cucumber ( Cucumis sativus L.) varieties to identify the genes involved in the resistance to Sphaerotheca fuliginea infection
Source: PeerJ journal article supplement (doi:10.7717/peerj.8250), 2020-04-17
Supplement: Table_S4.xlsx [file Table_S4.xlsx]

## Sheet: Sheet1
Table S4 Detailed information of all identified unigenes in the present study.
#GeneID	COG_class	COG_class_annotation	GO_annotation	KEGG_annotation	KEGG_pathway_annotation	KOG_class	KOG_class_annotation	Pfam_annotation	Swiss-Prot_annotation	eggNOG_class	eggNOG_class_annotation	NR_annotation
Csa2G348920	--	--	Molecular Function: DNA binding (GO:0003677);; Biological Process: cellular metabolic process (GO:0044237);; Biological Process: primary metabolic process (GO:0044238);; Biological Process: organ development (GO:0048513);; Biological Process: organic substance metabolic process (GO:0071704);;	--	--	[K]	Transcription	KNOX2 domain;; KNOX1 domain	Putative uncharacterized protein GN=VIT_01s0127g00210 OS=Vitis vinifera (Grape) PE=3 SV=1	K	Transcription	PREDICTED: homeobox protein knotted-1-like 6-like [Cucumis sativus]
Csa1G629160	--	--	Cellular Component: intracellular (GO:0005622);; Biological Process: DNA mediated transformation (GO:0009294);; Molecular Function: hydrolase activity (GO:0016787);; Biological Process: photoperiodism, flowering (GO:0048573);;	K11407|0|csv:101223581|histone deacetylase 15-like; K11407 histone deacetylase 6 [EC:3.5.1.98] (A)	--	[B]	Chromatin structure and dynamics	--	Putative uncharacterized protein GN=VIT_17s0000g04120 OS=Vitis vinifera (Grape) PE=4 SV=1	B	Chromatin structure and dynamics	PREDICTED: histone deacetylase 15-like, partial [Cucumis sativus]
Csa1G004960	[R]	General function prediction only	--	--	--	[Z]	Cytoskeleton	Tetratricopeptide repeat;; Tetratricopeptide repeat;; TPR repeat;; Tetratricopeptide repeat;; Tetratricopeptide repeat;; Tetratricopeptide repeat;; Tetratricopeptide repeat;; Tetratricopeptide repeat;; Tetratricopeptide repeat;; Tetratricopeptide repeat;; Soluble NSF attachment protein, SNAP;; Anaphase-promoting complex, cyclosome, subunit 3;; Uncharacterized protein conserved in bacteria (DUF222…	Putative uncharacterized protein GN=VIT_17s0000g08260 OS=Vitis vinifera (Grape) PE=4 SV=1	Z	Cytoskeleton	PREDICTED: uncharacterized protein LOC101208453 [Cucumis sativus]
Csa2G00990	--	--	Biological Process: mRNA splicing, via spliceosome (GO:0000398);; Biological Process: nuclear-transcribed mRNA catabolic process (GO:0000956);; Molecular Function: protein binding (GO:0005515);; Cellular Component: spliceosomal complex (GO:0005681);; Cellular Component: nucleolus (GO:0005730);; Biological Process: N-terminal protein myristoylation (GO:0006499);; Biological Process: response to sa…	K06063|0|csv:101211333|SNW domain-containing protein 1-like; K06063 SNW domain-containing protein 1 (A)	Spliceosome (ko03040)	[AB]	RNA processing and modification;; Chromatin structure and dynamics	SKIP/SNW domain	Uncharacterized protein GN=PRUPE_ppa003079mg OS=Prunus persica (Peach) PE=4 SV=1	AB	RNA processing and modification;; Chromatin structure and dynamics	PREDICTED: SNW domain-containing protein 1-like [Cucumis sativus]
Csa7G446900	--	--	Biological Process: cell communication (GO:0007154);; Biological Process: signal transduction (GO:0007165);;	K17925|0|csv:101219007|uncharacterized LOC101219007; K17925 sorting nexin-13 (A)	--	[ZUD]	Cytoskeleton;; Intracellular trafficking, secretion, and vesicular transport;; Cell cycle control, cell division, chromosome partitioning	PXA domain;; Sorting nexin C terminal;; PX domain	Uncharacterized protein GN=PRUPE_ppa000505mg OS=Prunus persica (Peach) PE=4 SV=1	DUZ	Cell cycle control, cell division, chromosome partitioning;; Intracellular trafficking, secretion, and vesicular transport;; Cytoskeleton	PREDICTED: uncharacterized protein LOC101219007 [Cucumis sativus]
Csa3G901100	--	--	--	K09422|7.347e-110|csv:101223431|transcription factor MYB39-like; K09422 myb proto-oncogene protein, plant (A)	--	--	--	--	R2r3-myb transcription factor, putative GN=RCOM_1278200 OS=Ricinus communis (Castor bean) PE=4 SV=1	K	Transcription	PREDICTED: transcription factor MYB39-like [Cucumis sativus]
Csa7G236790	--	--	Cellular Component: nucleosome (GO:0000786);; Molecular Function: DNA binding (GO:0003677);; Biological Process: nucleosome assembly (GO:0006334);;	--	--	--	--	--	Putative uncharacterized protein (Fragment) OS=Glycine max (Soybean) PE=2 SV=1	--	--	hypothetical protein RO3G_07217 [Rhizopus delemar RA 99-880]
Csa6G396640	[P]	Inorganic ion transport and metabolism	Molecular Function: nucleotide binding (GO:0000166);; Molecular Function: monooxygenase activity (GO:0004497);; Molecular Function: N,N-dimethylaniline monooxygenase activity (GO:0004499);; Cellular Component: extracellular region (GO:0005576);; Cellular Component: membrane (GO:0016020);; Biological Process: regulation of anatomical structure morphogenesis (GO:0022603);; Molecular Function: flavi…	K11816|0|csv:101225725|putative flavin-containing monooxygenase YUCCA11-like; K11816 indole-3-pyruvate monooxygenase [EC:1.14.13.168] (A)	Tryptophan metabolism (ko00380)	[Q]	Secondary metabolites biosynthesis, transport and catabolism	Flavin-binding monooxygenase-like;; Pyridine nucleotide-disulphide oxidoreductase;; L-lysine 6-monooxygenase (NADPH-requiring);; FAD binding domain;; Pyridine nucleotide-disulphide oxidoreductase;; Thi4 family;; Pyridine nucleotide-disulphide oxidoreductase;; Glucose inhibited division protein A;; FAD binding domain	Uncharacterized protein GN=PRUPE_ppa024334mg OS=Prunus persica (Peach) PE=4 SV=1	Q	Secondary metabolites biosynthesis, transport and catabolism	PREDICTED: putative flavin-containing monooxygenase YUCCA11-like [Cucumis sativus]
Csa2G293360	--	--	Biological Process: lipid metabolic process (GO:0006629);; Molecular Function: hydrolase activity (GO:0016787);;	--	--	[I]	Lipid transport and metabolism	--	Patatin-like protein (Fragment) OS=Cucumis sativus (Cucumber) PE=2 SV=1	I	Lipid transport and metabolism	PREDICTED: LOW QUALITY PROTEIN: patatin group A-3-like [Cucumis sativus]
Csa5G601540	--	--	Molecular Function: protein serine/threonine kinase activity (GO:0004674);; Molecular Function: ATP binding (GO:0005524);; Biological Process: protein phosphorylation (GO:0006468);; Cellular Component: membrane (GO:0016020);; Biological Process: cellular process involved in reproduction (GO:0048610);; Biological Process: root hair cell differentiation (GO:0048765);; Biological Process: anatomical…	--	--	[T]	Signal transduction mechanisms	Protein tyrosine kinase;; Protein kinase domain	Protein kinase family protein OS=Cucumis melo subsp. melo PE=3 SV=1	T	Signal transduction mechanisms	PREDICTED: proline-rich receptor-like protein kinase PERK13-like [Cucumis sativus]
Csa6G087950	[V]	Defense mechanisms	Biological Process: microtubule cytoskeleton organization (GO:0000226);; Cellular Component: plant-type vacuole (GO:0000325);; Biological Process: cytokinesis by cell plate formation (GO:0000911);; Molecular Function: ATP binding (GO:0005524);; Cellular Component: vacuolar membrane (GO:0005774);; Cellular Component: plasma membrane (GO:0005886);; Biological Process: ATP catabolic process (GO:0006…	--	--	[Q]	Secondary metabolites biosynthesis, transport and catabolism	ABC transporter transmembrane region;; ABC transporter;; AAA domain;; P-loop containing region of AAA domain;; Miro-like protein;; 50S ribosome-binding GTPase;; Domain of unknown function DUF87	Uncharacterized protein GN=PRUPE_ppa000172mg OS=Prunus persica (Peach) PE=4 SV=1	Q	Secondary metabolites biosynthesis, transport and catabolism	PREDICTED: ABC transporter C family member 5-like [Cucumis sativus]
Csa4G005540	--	--	--	--	--	--	--	Tubby C 2	Uncharacterized protein GN=PRUPE_ppa011580mg OS=Prunus persica (Peach) PE=4 SV=1	S	Function unknown	PREDICTED: protein LURP-one-related 12-like [Cucumis sativus]
Csa1G014430	--	--	--	--	--	--	--	F-box domain	Predicted protein GN=POPTRDRAFT_569113 OS=Populus trichocarpa (Western balsam poplar) PE=4 SV=1	R	General function prediction only	PREDICTED: F-box protein At3g07870-like [Cucumis sativus]
Csa1G073010	--	--	--	--	--	--	--	--	Uncharacterized protein OS=Glycine max (Soybean) PE=4 SV=1	S	Function unknown	Glucose-fructose oxidoreductase domain-containing protein 2, putative [Theobroma cacao]
Csa1G181540	[O]	Posttranslational modification, protein turnover, chaperones	Molecular Function: protein binding (GO:0005515);; Molecular Function: ATP binding (GO:0005524);; Cellular Component: vacuole (GO:0005773);; Cellular Component: Golgi apparatus (GO:0005794);; Cellular Component: plasma membrane (GO:0005886);; Cellular Component: plasmodesma (GO:0009506);; Molecular Function: nucleoside-triphosphatase activity (GO:0017111);;	K06027|0|csv:101227974|vesicle-fusing ATPase-like; K06027 vesicle-fusing ATPase [EC:3.6.4.6] (A)	--	[O]	Posttranslational modification, protein turnover, chaperones	ATPase family associated with various cellular activities (AAA);; Cell division protein 48 (CDC48), domain 2;; AAA domain (Cdc48 subfamily);; AAA domain (dynein-related subfamily)	Vesicular-fusion protein nsf, putative GN=RCOM_0936870 OS=Ricinus communis (Castor bean) PE=4 SV=1	O	Posttranslational modification, protein turnover, chaperones	PREDICTED: vesicle-fusing ATPase-like [Cucumis sativus]
Csa7G440620	--	--	--	--	--	--	--	--	Uncharacterized protein GN=PRUPE_ppa019184mg OS=Prunus persica (Peach) PE=4 SV=1	R	General function prediction only	PREDICTED: uncharacterized protein LOC101232250 [Cucumis sativus]
Csa7G067460	[J]	Translation, ribosomal structure and biogenesis	Molecular Function: nucleic acid binding (GO:0003676);; Cellular Component: cytoplasm (GO:0005737);; Biological Process: protein methylation (GO:0006479);; Molecular Function: protein methyltransferase activity (GO:0008276);;	K02493|0|csv:101224375|hemK methyltransferase family member 2-like; K02493 release factor glutamine methyltransferase [EC:2.1.1.297] (A)	--	[J]	Translation, ribosomal structure and biogenesis	Methyltransferase domain;; Methyltransferase small domain;; Methyltransferase domain;; Methyltransferase domain;; Ribosomal protein L11 methyltransferase (PrmA)	N6-DNA-methyltransferase OS=Cucumis melo subsp. melo PE=4 SV=1	J	Translation, ribosomal structure and biogenesis	PREDICTED: hemK methyltransferase family member 2-like [Cucumis sativus]
Csa3G239280	--	--	Biological Process: stomatal complex morphogenesis (GO:0010103);;	--	--	--	--	Protein of unknown function (DUF4005);; IQ calmodulin-binding motif	Putative uncharacterized protein OS=Cucumis melo subsp. melo PE=4 SV=1	S	Function unknown	PREDICTED: protein IQ-DOMAIN 14-like [Cucumis sativus]
Csa3G501410	--	--	Biological Process: organelle organization (GO:0006996);;	--	--	[O]	Posttranslational modification, protein turnover, chaperones	--	Uncharacterized protein GN=PRUPE_ppa000091mg OS=Prunus persica (Peach) PE=4 SV=1	O	Posttranslational modification, protein turnover, chaperones	PREDICTED: uncharacterized protein LOC101215560, partial [Cucumis sativus]
Csa3G060990	[Z]	Cytoskeleton	Molecular Function: structural constituent of cytoskeleton (GO:0005200);; Cellular Component: nucleus (GO:0005634);; Cellular Component: cytoplasm (GO:0005737);; Cellular Component: mitochondrion (GO:0005739);; Biological Process: actin filament-based process (GO:0030029);;	K16616|0|csv:101218880|actin-related protein 8-like; K16616 actin-related protein 8, plant (A)	--	[Z]	Cytoskeleton	Actin;; F-box-like;; F-box domain	Uncharacterized protein GN=PRUPE_ppa005141mg OS=Prunus persica (Peach) PE=4 SV=1	Z	Cytoskeleton	PREDICTED: actin-related protein 8-like [Cucumis sativus]
Csa7G374590	[K]	Transcription	Cellular Component: DNA-directed RNA polymerase IV complex (GO:0000418);; Molecular Function: DNA binding (GO:0003677);; Molecular Function: DNA-directed RNA polymerase activity (GO:0003899);; Cellular Component: DNA-directed RNA polymerase II, core complex (GO:0005665);; Biological Process: transcription, DNA-templated (GO:0006351);; Biological Process: protein targeting to mitochondrion (GO:000…	K03013|8.13889e-140|cmo:103492579|DNA-directed RNA polymerases II and IV subunit 5A; K03013 DNA-directed RNA polymerases I, II, and III subunit RPABC1 (A)	Purine metabolism (ko00230);; Pyrimidine metabolism (ko00240);; RNA polymerase (ko03020)	[K]	Transcription	RNA polymerase Rpb5, C-terminal domain;; RNA polymerase Rpb5, N-terminal domain	Predicted protein GN=POPTRDRAFT_828412 OS=Populus trichocarpa (Western balsam poplar) PE=3 SV=1	K	Transcription	PREDICTED: DNA-directed RNA polymerases I, II, and III subunit RPABC1-like [Cucumis sativus]
Csa7G004090	[R]	General function prediction only	Molecular Function: RNA binding (GO:0003723);; Cellular Component: intracellular part (GO:0044424);;	K14573|0|csv:101217384|RNA-binding protein 28-like; K14573 nucleolar protein 4 (A)	Ribosome biogenesis in eukaryotes (ko03008)	[A]	RNA processing and modification	RNA recognition motif. (a.k.a. RRM, RBD, or RNP domain);; RNA recognition motif (a.k.a. RRM, RBD, or RNP domain);; RNA recognition motif. (a.k.a. RRM, RBD, or RNP domain)	Putative uncharacterized protein GN=VIT_03s0038g00110 OS=Vitis vinifera (Grape) PE=4 SV=1	A	RNA processing and modification	PREDICTED: RNA-binding protein 28-like [Cucumis sativus]
Csa3G640570	--	--	Molecular Function: structural molecule activity (GO:0005198);; Cellular Component: plastoglobule (GO:0010287);;	--	--	--	--	PAP_fibrillin	Uncharacterized protein GN=PRUPE_ppa007515mg OS=Prunus persica (Peach) PE=4 SV=1	S	Function unknown	PREDICTED: probable plastid-lipid-associated protein 10, chloroplastic-like [Cucumis sativus]
Csa2G373590	[Q]	Secondary metabolites biosynthesis, transport and catabolism	Cellular Component: chloroplast stroma (GO:0009570);; Biological Process: response to auxin (GO:0009733);; Biological Process: cell wall modification involved in abscission (GO:0009830);; Biological Process: auxin polar transport (GO:0009926);; Biological Process: leaf morphogenesis (GO:0009965);; Biological Process: secondary shoot formation (GO:0010223);; Biological Process: carotene catabolic …	K17913|0|csv:101216826|carotenoid cleavage dioxygenase 8, chloroplastic-like; K17913 carlactone synthase / all-trans-10'-apo-beta-carotenal 13,14-cleaving dioxygenase [EC:1.13.11.69 1.13.11.70] (A)	Carotenoid biosynthesis (ko00906)	[Q]	Secondary metabolites biosynthesis, transport and catabolism	Retinal pigment epithelial membrane protein	Predicted protein GN=POPTRDRAFT_910575 OS=Populus trichocarpa (Western balsam poplar) PE=4 SV=1	Q	Secondary metabolites biosynthesis, transport and catabolism	PREDICTED: carotenoid cleavage dioxygenase 8, chloroplastic-like [Cucumis sativus]
Csa3G645910	--	--	--	--	--	--	--	Complex1_LYR-like;; Complex 1 protein (LYR family);; Complex1_LYR-like	Uncharacterized protein GN=PRUPE_ppa013656mg OS=Prunus persica (Peach) PE=4 SV=1	S	Function unknown	PREDICTED: uncharacterized protein LOC101204721 [Cucumis sativus]
Csa4G307360	[G]	Carbohydrate transport and metabolism	Biological Process: maltose metabolic process (GO:0000023);; Biological Process: sucrose metabolic process (GO:0005985);; Biological Process: fructose metabolic process (GO:0006000);; Biological Process: pentose-phosphate shunt (GO:0006098);; Biological Process: rRNA processing (GO:0006364);; Biological Process: response to cold (GO:0009409);; Cellular Component: chloroplast stroma (GO:0009570);;…	K03841|0|csv:101211447|fructose-1,6-bisphosphatase, chloroplastic-like; K03841 fructose-1,6-bisphosphatase I [EC:3.1.3.11] (A)	Glycolysis / Gluconeogenesis (ko00010);; Pentose phosphate pathway (ko00030);; Fructose and mannose metabolism (ko00051);; Carbon fixation in photosynthetic organisms (ko00710);; Carbon metabolism (ko01200)	[G]	Carbohydrate transport and metabolism	Fructose-1-6-bisphosphatase	Predicted protein GN=POPTRDRAFT_825309 OS=Populus trichocarpa (Western balsam poplar) PE=3 SV=1	G	Carbohydrate transport and metabolism	PREDICTED: fructose-1,6-bisphosphatase, chloroplastic-like [Cucumis sativus]
Csa3G011830	[T]	Signal transduction mechanisms	Molecular Function: phosphoprotein phosphatase activity (GO:0004721);; Molecular Function: protein serine/threonine phosphatase activity (GO:0004722);; Molecular Function: phospholipid binding (GO:0005543);; Cellular Component: plasma membrane (GO:0005886);; Biological Process: regulation of transcription, DNA-templated (GO:0006355);; Biological Process: unidimensional cell growth (GO:0009826);; …	--	--	[T]	Signal transduction mechanisms	Protein phosphatase 2C	Putative uncharacterized protein GN=VIT_02s0012g01100 OS=Vitis vinifera (Grape) PE=4 SV=1	T	Signal transduction mechanisms	PREDICTED: protein phosphatase 2C 29-like [Cucumis sativus]
Csa1G046220	--	--	--	--	--	--	--	--	Uncharacterized protein GN=PRUPE_ppa008249mg OS=Prunus persica (Peach) PE=4 SV=1	S	Function unknown	PREDICTED: uncharacterized protein LOC101204576 [Cucumis sativus]
Csa4G050200	[RTKL]	General function prediction only;; Signal transduction mechanisms;; Transcription;; Replication, recombination and repair	Molecular Function: calmodulin-dependent protein kinase activity (GO:0004683);; Molecular Function: calcium ion binding (GO:0005509);; Molecular Function: ATP binding (GO:0005524);; Cellular Component: vacuole (GO:0005773);; Cellular Component: cytosol (GO:0005829);; Cellular Component: plasma membrane (GO:0005886);; Biological Process: response to salt stress (GO:0009651);; Biological Process: a…	K13412|0|cmo:103493133|calcium-dependent protein kinase 3; K13412 calcium-dependent protein kinase [EC:2.7.11.1] (A)	Plant-pathogen interaction (ko04626)	[T]	Signal transduction mechanisms	Protein kinase domain;; EF hand;; EF-hand domain pair;; Protein tyrosine kinase;; EF-hand domain pair;; EF-hand domain;; EF hand;; Cytoskeletal-regulatory complex EF hand;; Secreted protein acidic and rich in cysteine Ca binding region;; Toprim-like;; Ca2+ insensitive EF hand	Calcium-dependent calmodulin-independent protein kinase 5 GN=CDPK5 OS=Cucumis sativus (Cucumber) PE=2 SV=2	T	Signal transduction mechanisms	calcium-dependent protein kinase 3-like [Cucumis sativus]
Csa4G652030	[R]	General function prediction only	Molecular Function: nucleotide binding (GO:0000166);; Biological Process: RNA splicing, via endonucleolytic cleavage and ligation (GO:0000394);; Molecular Function: translation initiation factor activity (GO:0003743);; Cellular Component: nucleus (GO:0005634);; Biological Process: regulation of transcription, DNA-templated (GO:0006355);; Biological Process: transcription from RNA polymerase II pr…	K03130|0|csv:101214018|transcription initiation factor TFIID subunit 5-like; K03130 transcription initiation factor TFIID subunit 5 (A)	Basal transcription factors (ko03022)	[K]	Transcription	WD domain, G-beta repeat;; WD40 associated region in TFIID subunit	Putative uncharacterized protein GN=VIT_04s0008g05780 OS=Vitis vinifera (Grape) PE=4 SV=1	K	Transcription	PREDICTED: transcription initiation factor TFIID subunit 5-like [Cucumis sativus]
Csa4G651830	--	--	Molecular Function: ubiquitin thiolesterase activity (GO:0004221);; Molecular Function: ubiquitin-specific protease activity (GO:0004843);; Biological Process: ubiquitin-dependent protein catabolic process (GO:0006511);; Molecular Function: zinc ion binding (GO:0008270);;	--	--	--	--	Myb/SANT-like DNA-binding domain;; Ubiquitin carboxyl-terminal hydrolase;; Ubiquitin carboxyl-terminal hydrolase;; Myb/SANT-like DNA-binding domain	Uncharacterized protein GN=PRUPE_ppa001711mg OS=Prunus persica (Peach) PE=4 SV=1	S	Function unknown	PREDICTED: uncharacterized protein LOC101212813 [Cucumis sativus]
Csa1G169920	--	--	--	--	--	--	--	Late embryogenesis abundant protein	Uncharacterized protein GN=PRUPE_ppa011071mg OS=Prunus persica (Peach) PE=4 SV=1	S	Function unknown	PREDICTED: uncharacterized protein At1g08160-like [Cucumis sativus]
Csa4G064070	--	--	--	--	--	--	--	--	Putative uncharacterized protein GN=VIT_19s0027g00340 OS=Vitis vinifera (Grape) PE=4 SV=1	S	Function unknown	PREDICTED: uncharacterized protein LOC101217146 [Cucumis sativus]
Csa1G532360	--	--	Cellular Component: chloroplast envelope (GO:0009941);;	--	--	--	--	Mitochondrial fission regulator	Predicted protein GN=POPTRDRAFT_1087631 OS=Populus trichocarpa (Western balsam poplar) PE=4 SV=1	S	Function unknown	F10K1.18 protein, putative isoform 1 [Theobroma cacao]
Csa4G641500	--	--	Molecular Function: transferase activity (GO:0016740);;	--	--	--	--	Transferase family	Uncharacterized protein OS=Glycine max (Soybean) PE=4 SV=1	S	Function unknown	PREDICTED: uncharacterized acetyltransferase At3g50280-like [Cucumis sativus]
Csa2G023870	--	--	Molecular Function: iron ion binding (GO:0005506);; Cellular Component: cytoplasm (GO:0005737);; Biological Process: response to wounding (GO:0009611);; Biological Process: response to abscisic acid (GO:0009737);; Biological Process: response to jasmonic acid (GO:0009753);; Biological Process: defense response to bacterium, incompatible interaction (GO:0009816);; Molecular Function: linoleate 13S…	K15718|4.60813e-80|csv:101211823|probable linoleate 9S-lipoxygenase 5-like; K15718 linoleate 9S-lipoxygenase [EC:1.13.11.58] (A)	Linoleic acid metabolism (ko00591)	--	--	Lipoxygenase	Lipoxygenase (Fragment) GN=Lox OS=Vitis vinifera (Grape) PE=2 SV=1	S	Function unknown	PREDICTED: LOW QUALITY PROTEIN: probable linoleate 9S-lipoxygenase 5-like [Cucumis sativus]
Csa3G129490	--	--	Cellular Component: nucleus (GO:0005634);; Cellular Component: plasma membrane (GO:0005886);;	--	--	--	--	--	Uncharacterized protein OS=Glycine max (Soybean) PE=4 SV=1	S	Function unknown	PREDICTED: uncharacterized protein LOC101207305 [Cucumis sativus]
Csa3G127110	--	--	Biological Process: chloroplast RNA processing (GO:0031425);;	--	--	[R]	General function prediction only	PPR repeat family;; PPR repeat;; Pentatricopeptide repeat domain;; PPR repeat;; DYW family of nucleic acid deaminases;; Tetratricopeptide repeat	Uncharacterized protein GN=PRUPE_ppa024598mg OS=Prunus persica (Peach) PE=4 SV=1	R	General function prediction only	PREDICTED: pentatricopeptide repeat-containing protein At2g29760, chloroplastic-like [Cucumis sativus]
Csa6G157680	[O]	Posttranslational modification, protein turnover, chaperones	Molecular Function: protein binding (GO:0005515);; Cellular Component: nucleus (GO:0005634);; Cellular Component: cytosol (GO:0005829);; Biological Process: gluconeogenesis (GO:0006094);; Biological Process: cytoskeleton organization (GO:0007010);; Biological Process: response to heat (GO:0009408);; Biological Process: heat acclimation (GO:0010286);; Biological Process: proteasomal protein catabo…	K12160|6.18902e-69|csv:101230588|small ubiquitin-related modifier 2-like; K12160 small ubiquitin-related modifier (A)	RNA transport (ko03013)	[O]	Posttranslational modification, protein turnover, chaperones	Ubiquitin-2 like Rad60 SUMO-like;; Ubiquitin family	Predicted protein GN=POPTRDRAFT_834953 OS=Populus trichocarpa (Western balsam poplar) PE=4 SV=1	O	Posttranslational modification, protein turnover, chaperones	PREDICTED: small ubiquitin-related modifier 2-like [Cucumis sativus]
Csa3G077620	[C]	Energy production and conversion	Biological Process: maltose metabolic process (GO:0000023);; Biological Process: rRNA processing (GO:0006364);; Biological Process: glycine catabolic process (GO:0006546);; Biological Process: unsaturated fatty acid biosynthetic process (GO:0006636);; Biological Process: oxidoreduction coenzyme metabolic process (GO:0006733);; Biological Process: vitamin metabolic process (GO:0006766);; Biologica…	K02115|0|csv:101214682|ATP synthase gamma chain 1, chloroplastic-like; K02115 F-type H+-transporting ATPase subunit gamma (A)	Oxidative phosphorylation (ko00190);; Photosynthesis (ko00195)	[C]	Energy production and conversion	ATP synthase	Uncharacterized protein OS=Glycine max (Soybean) PE=3 SV=1	C	Energy production and conversion	PREDICTED: ATP synthase gamma chain 1, chloroplastic-like [Cucumis sativus]
Csa7G428170	[V]	Defense mechanisms	Cellular Component: membrane (GO:0016020);; Molecular Function: transmembrane transporter activity (GO:0022857);; Biological Process: transmembrane transport (GO:0055085);;	--	--	[R]	General function prediction only	MatE;; Polysaccharide biosynthesis C-terminal domain	Uncharacterized protein GN=PRUPE_ppa027104mg OS=Prunus persica (Peach) PE=4 SV=1	R	General function prediction only	PREDICTED: MATE efflux family protein FRD3-like [Cucumis sativus]
Csa3G775240	[R]	General function prediction only	Cellular Component: peroxisomal matrix (GO:0005782);; Cellular Component: plasma membrane (GO:0005886);; Cellular Component: chloroplast (GO:0009507);; Molecular Function: monodehydroascorbate reductase (NADH) activity (GO:0016656);; Biological Process: cell redox homeostasis (GO:0045454);; Biological Process: response to cadmium ion (GO:0046686);; Cellular Component: apoplast (GO:0048046);; Mole…	K08232|0|csv:101207933|monodehydroascorbate reductase-like; K08232 monodehydroascorbate reductase (NADH) [EC:1.6.5.4] (A)	Ascorbate and aldarate metabolism (ko00053)	[R]	General function prediction only	Pyridine nucleotide-disulphide oxidoreductase;; Pyridine nucleotide-disulphide oxidoreductase;; Tryptophan halogenase	Uncharacterized protein GN=PRUPE_ppa005968mg OS=Prunus persica (Peach) PE=4 SV=1	R	General function prediction only	PREDICTED: monodehydroascorbate reductase-like [Cucumis sativus]
Csa7G014470	--	--	Biological Process: multicellular organismal development (GO:0007275);; Biological Process: anatomical structure development (GO:0048856);;	--	--	--	--	--	Putative uncharacterized protein GN=VIT_01s0127g00860 OS=Vitis vinifera (Grape) PE=4 SV=1	K	Transcription	PREDICTED: transcription factor ABORTED MICROSPORES-like [Cucumis sativus]
Csa1G033010	--	--	Biological Process: cytokinesis by cell plate formation (GO:0000911);; Cellular Component: nucleus (GO:0005634);; Cellular Component: microtubule organizing center (GO:0005815);; Cellular Component: spindle (GO:0005819);; Cellular Component: microtubule (GO:0005874);; Molecular Function: microtubule binding (GO:0008017);; Cellular Component: phragmoplast (GO:0009524);; Biological Process: tropism…	K10436|1.67755e-173|csv:101228232|microtubule-associated protein RP/EB family member 1B-like; K10436 microtubule-associated protein, RP/EB family (A)	--	[DZ]	Cell cycle control, cell division, chromosome partitioning;; Cytoskeleton	EB1-like C-terminal motif;; Calponin homology (CH) domain	Uncharacterized protein GN=PRUPE_ppa009753mg OS=Prunus persica (Peach) PE=4 SV=1	Z	Cytoskeleton	PREDICTED: microtubule-associated protein RP/EB family member 1B-like [Cucumis sativus]
Csa7G058540	[I]	Lipid transport and metabolism	Molecular Function: phosphatidylserine decarboxylase activity (GO:0004609);; Cellular Component: endoplasmic reticulum (GO:0005783);; Molecular Function: oxidoreductase activity (GO:0016491);; Biological Process: single-organism metabolic process (GO:0044710);; Molecular Function: metal ion binding (GO:0046872);;	K01613|6.6728e-129|csv:101221364|phosphatidylserine decarboxylase proenzyme 3-like; K01613 phosphatidylserine decarboxylase [EC:4.1.1.65] (A)	Glycerophospholipid metabolism (ko00564)	[I]	Lipid transport and metabolism	Phosphatidylserine decarboxylase	Uncharacterized protein GN=PRUPE_ppa006115mg OS=Prunus persica (Peach) PE=4 SV=1	I	Lipid transport and metabolism	PREDICTED: phosphatidylserine decarboxylase proenzyme 3-like [Cucumis sativus]
Csa4G192210	--	--	Cellular Component: endoplasmic reticulum (GO:0005783);; Biological Process: transport (GO:0006810);; Molecular Function: water channel activity (GO:0015250);; Cellular Component: integral component of membrane (GO:0016021);;	K09875|7.8489e-130|csv:101220534|aquaporin SIP1-2-like; K09875 aquaporin SIP (A)	--	[G]	Carbohydrate transport and metabolism	Major intrinsic protein	Small basic intrinsic protein 1 GN=VIT_08s0007g07680 OS=Vitis vinifera (Grape) PE=2 SV=1	G	Carbohydrate transport and metabolism	PREDICTED: aquaporin SIP1-2-like [Cucumis sativus]
Csa1G701390	[R]	General function prediction only	Molecular Function: DNA binding (GO:0003677);; Cellular Component: mitochondrion (GO:0005739);; Biological Process: response to oxidative stress (GO:0006979);; Cellular Component: chloroplast (GO:0009507);; Molecular Function: sulfiredoxin activity (GO:0032542);; Biological Process: oxidation-reduction process (GO:0055114);;	--	--	[L]	Replication, recombination and repair	ParB-like nuclease domain	Predicted protein GN=POPTRDRAFT_814302 OS=Populus trichocarpa (Western balsam poplar) PE=4 SV=1	L	Replication, recombination and repair	PREDICTED: sulfiredoxin, chloroplastic/mitochondrial-like [Cucumis sativus]
Csa4G289630	--	--	Molecular Function: transferase activity, transferring phosphorus-containing groups (GO:0016772);;	--	--	--	--	D-mannose binding lectin;; Protein tyrosine kinase;; Protein kinase domain	Serine/threonine-protein kinase GN=RCOM_1576610 OS=Ricinus communis (Castor bean) PE=3 SV=1	T	Signal transduction mechanisms	PREDICTED: G-type lectin S-receptor-like serine/threonine-protein kinase RLK1-like [Cucumis sativus]
Csa7G291710	[IQR]	Lipid transport and metabolism;; Secondary metabolites biosynthesis, transport and catabolism;; General function prediction only	Molecular Function: nucleotide binding (GO:0000166);; Molecular Function: protochlorophyllide reductase activity (GO:0016630);; Biological Process: oxidation-reduction process (GO:0055114);;	K11168|0|csv:101217652|dehydrogenase/reductase SDR family member 12-like; K11168 dehydrogenase/reductase SDR family member 12 [EC:1.1.-.-] (A)	--	[Q]	Secondary metabolites biosynthesis, transport and catabolism	short chain dehydrogenase;; Helicase conserved C-terminal domain;; KR domain;; Enoyl-(Acyl carrier protein) reductase;; NAD dependent epimerase/dehydratase family;; NADH(P)-binding	Uncharacterized protein GN=PRUPE_ppa007847mg OS=Prunus persica (Peach) PE=4 SV=1	Q	Secondary metabolites biosynthesis, transport and catabolism	PREDICTED: dehydrogenase/reductase SDR family member 12-like [Cucumis sativus]
Csa5G588760	[R]	General function prediction only	Molecular Function: nucleotide binding (GO:0000166);; Molecular Function: histone acetyltransferase activity (GO:0004402);; Cellular Component: nucleus (GO:0005634);; Cellular Component: heterotrimeric G-protein complex (GO:0005834);; Biological Process: histone acetylation (GO:0016573);; Cellular Component: Cul4-RING E3 ubiquitin ligase complex (GO:0080008);;	K12857|0|csv:101216854|U5 small nuclear ribonucleoprotein 40 kDa protein-like; K12857 Prp8 binding protein (A)	Spliceosome (ko03040)	[A]	RNA processing and modification	WD domain, G-beta repeat;; Nucleoporin Nup120/160	Uncharacterized protein OS=Glycine max (Soybean) PE=4 SV=1	A	RNA processing and modification	PREDICTED: U5 small nuclear ribonucleoprotein 40 kDa protein-like [Cucumis sativus]
Csa2G292230	--	--	--	--	--	--	--	B3 DNA binding domain	Uncharacterized protein OS=Glycine max (Soybean) PE=4 SV=1	S	Function unknown	PREDICTED: B3 domain-containing transcription factor VRN1-like [Cucumis sativus]
Csa2G361660	--	--	Molecular Function: 5'-nucleotidase activity (GO:0008253);; Cellular Component: chloroplast (GO:0009507);; Molecular Function: metal ion binding (GO:0046872);;	--	--	[F]	Nucleotide transport and metabolism	5' nucleotidase family	Putative uncharacterized protein GN=VIT_18s0001g12510 OS=Vitis vinifera (Grape) PE=3 SV=1	F	Nucleotide transport and metabolism	PREDICTED: cytosolic purine 5&apos;-nucleotidase-like [Cucumis sativus]
Csa1G171020	--	--	Biological Process: meiotic DNA double-strand break formation (GO:0042138);;	--	--	--	--	--	Putative uncharacterized protein GN=VIT_06s0004g07190 OS=Vitis vinifera (Grape) PE=4 SV=1	S	Function unknown	PREDICTED: uncharacterized protein LOC101211584 [Cucumis sativus]
Csa7G071560	--	--	Cellular Component: plasma membrane (GO:0005886);; Biological Process: acetyl-CoA metabolic process (GO:0006084);; Biological Process: regulation of meristem growth (GO:0010075);; Biological Process: sterol biosynthetic process (GO:0016126);; Biological Process: brassinosteroid biosynthetic process (GO:0016132);; Cellular Component: anchored component of membrane (GO:0031225);; Biological Process…	--	--	--	--	--	Predicted protein GN=POPTRDRAFT_549973 OS=Populus trichocarpa (Western balsam poplar) PE=2 SV=1	--	--	PREDICTED: uncharacterized protein LOC101217806 [Cucumis sativus]
Csa2G279230	--	--	Biological Process: primary metabolic process (GO:0044238);; Biological Process: single-organism cellular process (GO:0044763);; Biological Process: regulation of biological process (GO:0050789);; Biological Process: organic substance metabolic process (GO:0071704);;	--	--	--	--	Plant protein of unknown function (DUF869)	Putative uncharacterized protein GN=VIT_07s0031g00250 OS=Vitis vinifera (Grape) PE=4 SV=1	S	Function unknown	PREDICTED: filament-like plant protein 7-like [Cucumis sativus]
Csa5G155580	--	--	--	--	--	--	--	--	Putative uncharacterized protein GN=VITISV_008798 OS=Vitis vinifera (Grape) PE=4 SV=1	S	Function unknown	PREDICTED: uncharacterized protein LOC101219575 [Cucumis sativus]
Csa2G238260	[I]	Lipid transport and metabolism	Biological Process: long-chain fatty acid metabolic process (GO:0001676);; Biological Process: defense response to insect (GO:0002213);; Molecular Function: acetate-CoA ligase activity (GO:0003987);; Molecular Function: long-chain fatty acid-CoA ligase activity (GO:0004467);; Cellular Component: endoplasmic reticulum (GO:0005783);; Biological Process: fatty acid biosynthetic process (GO:0006633);…	K01897|0|csv:101212575|long chain acyl-CoA synthetase 2-like; K01897 long-chain acyl-CoA synthetase [EC:6.2.1.3] (A)	Fatty acid biosynthesis (ko00061);; Fatty acid degradation (ko00071);; Fatty acid metabolism (ko01212);; Peroxisome (ko04146)	[I]	Lipid transport and metabolism	AMP-binding enzyme	Predicted protein GN=POPTRDRAFT_833082 OS=Populus trichocarpa (Western balsam poplar) PE=4 SV=1	I	Lipid transport and metabolism	PREDICTED: long chain acyl-CoA synthetase 2-like [Cucumis sativus]
Csa6G487550	[Q]	Secondary metabolites biosynthesis, transport and catabolism	Molecular Function: monooxygenase activity (GO:0004497);; Molecular Function: oxidoreductase activity (GO:0016491);; Molecular Function: oxidoreductase activity, acting on paired donors, with incorporation or reduction of molecular oxygen (GO:0016705);; Molecular Function: metal ion binding (GO:0046872);;	--	--	[QI]	Secondary metabolites biosynthesis, transport and catabolism;; Lipid transport and metabolism	Cytochrome P450	Putative uncharacterized protein GN=VIT_07s0031g01660 OS=Vitis vinifera (Grape) PE=3 SV=1	Q	Secondary metabolites biosynthesis, transport and catabolism	PREDICTED: cytochrome P450 86B1-like [Cucumis sativus]
Csa3G829040	--	--	Molecular Function: cGMP-dependent protein kinase activity (GO:0004692);; Molecular Function: voltage-gated potassium channel activity (GO:0005249);; Molecular Function: calmodulin binding (GO:0005516);; Molecular Function: ATP binding (GO:0005524);; Cellular Component: plasma membrane (GO:0005886);; Biological Process: protein phosphorylation (GO:0006468);; Biological Process: potassium ion tran…	K05391|0|csv:101221166|putative cyclic nucleotide-gated ion channel 8-like; K05391 cyclic nucleotide gated channel, other eukaryote (A)	Plant-pathogen interaction (ko04626)	[PT]	Inorganic ion transport and metabolism;; Signal transduction mechanisms	Ion transport protein;; Cyclic nucleotide-binding domain	Predicted protein GN=POPTRDRAFT_853754 OS=Populus trichocarpa (Western balsam poplar) PE=4 SV=1	P	Inorganic ion transport and metabolism	PREDICTED: putative cyclic nucleotide-gated ion channel 8-like [Cucumis sativus]
Csa7G014540	--	--	Cellular Component: protein phosphatase type 2A complex (GO:0000159);; Cellular Component: mitochondrion (GO:0005739);; Biological Process: protein targeting (GO:0006605);; Biological Process: signal transduction (GO:0007165);; Molecular Function: protein phosphatase type 2A regulator activity (GO:0008601);; Cellular Component: plastid (GO:0009536);; Cellular Component: membrane (GO:0016020);;	--	--	--	--	SecE/Sec61-gamma subunits of protein translocation complex	Uncharacterized protein OS=Glycine max (Soybean) PE=4 SV=1	S	Function unknown	PREDICTED: uncharacterized protein LOC101211352 [Cucumis sativus]
Csa4G242890	--	--	--	--	--	--	--	--	Envelope-like protein OS=Cucumis melo subsp. melo PE=4 SV=1	--	--	envelope-like protein [Cucumis melo subsp. melo]
Csa7G009800	[R]	General function prediction only	Cellular Component: nucleus (GO:0005634);; Cellular Component: mitochondrion (GO:0005739);; Biological Process: circadian rhythm (GO:0007623);; Molecular Function: methyltransferase activity (GO:0008168);; Biological Process: methylation (GO:0032259);; Biological Process: photoperiodism, flowering (GO:0048573);;	K06970|0|csv:101205279|methyltransferase-like protein 16 homolog; K06970 23S rRNA (adenine1618-N6)-methyltransferase [EC:2.1.1.181] (A)	--	[S]	Function unknown	Protein of unknown function (DUF890)	Putative uncharacterized protein GN=VIT_03s0038g02100 OS=Vitis vinifera (Grape) PE=4 SV=1	S	Function unknown	PREDICTED: methyltransferase-like protein 16 homolog [Cucumis sativus]
Csa2G099480	--	--	Molecular Function: aspartic-type endopeptidase activity (GO:0004190);; Biological Process: proteolysis (GO:0006508);; Biological Process: response to stress (GO:0006950);; Biological Process: hormone-mediated signaling pathway (GO:0009755);; Biological Process: macromolecule localization (GO:0033036);; Biological Process: cellular macromolecule catabolic process (GO:0044265);; Biological Process…	--	--	[O]	Posttranslational modification, protein turnover, chaperones	Xylanase inhibitor N-terminal;; Eukaryotic aspartyl protease;; Xylanase inhibitor C-terminal	Aspartic proteinase Asp1, putative GN=RCOM_1077820 OS=Ricinus communis (Castor bean) PE=4 SV=1	O	Posttranslational modification, protein turnover, chaperones	PREDICTED: aspartic proteinase-like protein 2-like [Cucumis sativus]
Csa6G439960	--	--	Cellular Component: nucleus (GO:0005634);; Biological Process: embryo development ending in seed dormancy (GO:0009793);; Biological Process: regulation of biological process (GO:0050789);;	K08064|0|csv:101212961|nuclear transcription factor Y subunit A-1-like; K08064 nuclear transcription factor Y, alpha (A)	--	[K]	Transcription	CCAAT-binding transcription factor (CBF-B/NF-YA) subunit B	Uncharacterized protein OS=Glycine max (Soybean) PE=4 SV=1	K	Transcription	PREDICTED: nuclear transcription factor Y subunit A-1-like [Cucumis sativus]
Csa3G797600	[J]	Translation, ribosomal structure and biogenesis	Molecular Function: structural constituent of ribosome (GO:0003735);; Cellular Component: nucleolus (GO:0005730);; Cellular Component: mitochondrion (GO:0005739);; Biological Process: translation (GO:0006412);; Cellular Component: chloroplast (GO:0009507);; Cellular Component: cytosolic large ribosomal subunit (GO:0022625);;	K02889|9.85948e-38|csv:101232540|60S ribosomal protein L21-1-like; K02889 large subunit ribosomal protein L21e (A)	Ribosome (ko03010)	[J]	Translation, ribosomal structure and biogenesis	--	Uncharacterized protein GN=PRUPE_ppa012553mg OS=Prunus persica (Peach) PE=4 SV=1	J	Translation, ribosomal structure and biogenesis	PREDICTED: 60S ribosomal protein L21-1-like [Cucumis sativus]
Csa3G134560	--	--	--	--	--	--	--	--	Auxin responsive protein OS=Cucumis sativus (Cucumber) PE=4 SV=1	--	--	auxin responsive protein [Cucumis sativus]
Csa5G606340	--	--	Cellular Component: mitochondrion (GO:0005739);;	K17402|8.25525e-135|csv:101227760|uncharacterized LOC101227760; K17402 small subunit ribosomal protein S23 (A)	--	--	--	--	Putative uncharacterized protein GN=VIT_00s0261g00010 OS=Vitis vinifera (Grape) PE=2 SV=1	S	Function unknown	PREDICTED: uncharacterized protein LOC101217717 [Cucumis sativus]
Csa1G595810	[N]	Cell motility	Cellular Component: ESCRT III complex (GO:0000815);; Molecular Function: protein binding (GO:0005515);; Cellular Component: multivesicular body (GO:0005771);; Biological Process: membrane fusion (GO:0006944);; Biological Process: response to high light intensity (GO:0009644);; Biological Process: response to chitin (GO:0010200);; Biological Process: protein transport (GO:0015031);; Biological Pro…	K12191|1.67223e-124|cmo:103492353|vacuolar protein sorting-associated protein 2 homolog 1; K12191 charged multivesicular body protein 2A (A)	Endocytosis (ko04144)	[U]	Intracellular trafficking, secretion, and vesicular transport	Snf7	Charged multivesicular body protein 2a, putative GN=RCOM_1045990 OS=Ricinus communis (Castor bean) PE=4 SV=1	U	Intracellular trafficking, secretion, and vesicular transport	PREDICTED: vacuolar protein sorting-associated protein 2 homolog 1-like [Cucumis sativus]
Csa7G446700	--	--	Molecular Function: binding (GO:0005488);; Biological Process: regulation of transcription, DNA-templated (GO:0006355);;	--	--	[K]	Transcription	Myb/SANT-like DNA-binding domain;; Alcohol dehydrogenase transcription factor Myb/SANT-like;; Myb/SANT-like DNA-binding domain;; Myb/SANT-like DNA-binding domain	Putative uncharacterized protein GN=VIT_09s0002g04700 OS=Vitis vinifera (Grape) PE=4 SV=1	K	Transcription	PREDICTED: uncharacterized protein LOC101223116 [Cucumis sativus]
Csa6G051470	--	--	Cellular Component: nucleus (GO:0005634);; Biological Process: heat acclimation (GO:0010286);; Biological Process: regulation of defense response (GO:0031347);;	--	--	--	--	Myb/SANT-like DNA-binding domain	Uncharacterized protein GN=PRUPE_ppa009122mg OS=Prunus persica (Peach) PE=4 SV=1	S	Function unknown	PREDICTED: uncharacterized protein LOC101213668 [Cucumis sativus]
Csa2G350440	[IQR]	Lipid transport and metabolism;; Secondary metabolites biosynthesis, transport and catabolism;; General function prediction only	Biological Process: very long-chain fatty acid metabolic process (GO:0000038);; Molecular Function: 3-oxoacyl-[acyl-carrier-protein] reductase (NADPH) activity (GO:0004316);; Molecular Function: copper ion binding (GO:0005507);; Biological Process: fatty acid biosynthetic process (GO:0006633);; Biological Process: response to cold (GO:0009409);; Cellular Component: chloroplast stroma (GO:0009570)…	K00059|0|csv:101224010|3-oxoacyl-[acyl-carrier-protein] reductase, chloroplastic-like; K00059 3-oxoacyl-[acyl-carrier protein] reductase [EC:1.1.1.100] (A)	Fatty acid biosynthesis (ko00061);; Biotin metabolism (ko00780);; Biosynthesis of unsaturated fatty acids (ko01040);; Fatty acid metabolism (ko01212)	[I]	Lipid transport and metabolism	short chain dehydrogenase;; Enoyl-(Acyl carrier protein) reductase;; KR domain	Putative uncharacterized protein GN=VIT_01s0010g02670 OS=Vitis vinifera (Grape) PE=3 SV=1	Q	Secondary metabolites biosynthesis, transport and catabolism	PREDICTED: 3-oxoacyl-[acyl-carrier-protein] reductase, chloroplastic-like [Cucumis sativus]
Csa3G126850	[R]	General function prediction only	Cellular Component: nucleus (GO:0005634);; Biological Process: tRNA modification (GO:0006400);; Molecular Function: tRNA (guanine-N7-)-methyltransferase activity (GO:0008176);; Biological Process: RNA (guanine-N7)-methylation (GO:0036265);;	K03439|0|csv:101228242|tRNA (guanine-N(7)-)-methyltransferase-like; K03439 tRNA (guanine-N7-)-methyltransferase [EC:2.1.1.33] (A)	--	[R]	General function prediction only	Putative methyltransferase;; Methyltransferase domain	Putative uncharacterized protein GN=VIT_15s0024g00790 OS=Vitis vinifera (Grape) PE=4 SV=1	R	General function prediction only	PREDICTED: tRNA (guanine-N(7)-)-methyltransferase-like [Cucumis sativus]
Csa2G359970	--	--	Cellular Component: cytosol (GO:0005829);; Cellular Component: plasma membrane (GO:0005886);; Biological Process: negative regulation of brassinosteroid biosynthetic process (GO:0010423);; Cellular Component: cell part (GO:0044464);; Molecular Function: protein heterodimerization activity (GO:0046982);;	K14499|5.95677e-114|csv:101226656|BRI1 kinase inhibitor 1-like; K14499 BRI1 kinase inhibitor 1 (A)	Plant hormone signal transduction (ko04075)	--	--	--	Putative uncharacterized protein GN=VIT_18s0001g10690 OS=Vitis vinifera (Grape) PE=4 SV=1	T	Signal transduction mechanisms	PREDICTED: BRI1 kinase inhibitor 1-like [Cucumis sativus]
Csa1G153540	--	--	--	K14490|5.29829e-92|csv:101232109|histidine-containing phosphotransfer protein 5-like; K14490 histidine-containing phosphotransfer peotein (A)	Plant hormone signal transduction (ko04075)	[T]	Signal transduction mechanisms	--	Uncharacterized protein OS=Musa acuminata subsp. malaccensis (Wild banana) PE=4 SV=1	T	Signal transduction mechanisms	PREDICTED: histidine-containing phosphotransfer protein 5-like [Cucumis sativus]
Csa4G269720	--	--	Molecular Function: translation initiation factor activity (GO:0003743);; Cellular Component: nuclear euchromatin (GO:0005719);; Cellular Component: nucleolus (GO:0005730);; Cellular Component: cytoplasm (GO:0005737);; Biological Process: DNA methylation (GO:0006306);; Biological Process: chromatin silencing (GO:0006342);; Biological Process: translational initiation (GO:0006413);; Biological Pro…	K11593|0|csv:101220468|protein argonaute 4-like; K11593 eukaryotic translation initiation factor 2C (A)	--	[J]	Translation, ribosomal structure and biogenesis	Piwi domain;; PAZ domain;; Domain of unknown function (DUF1785)	Uncharacterized protein GN=PRUPE_ppa000990mg OS=Prunus persica (Peach) PE=4 SV=1	J	Translation, ribosomal structure and biogenesis	PREDICTED: protein argonaute 4-like [Cucumis sativus]
Csa4G340510	[C]	Energy production and conversion	Molecular Function: glycerol-3-phosphate dehydrogenase [NAD+] activity (GO:0004367);; Cellular Component: cytosol (GO:0005829);; Biological Process: carbohydrate metabolic process (GO:0005975);; Cellular Component: glycerol-3-phosphate dehydrogenase complex (GO:0009331);; Biological Process: systemic acquired resistance (GO:0009627);; Biological Process: glycerol-3-phosphate catabolic process (GO…	--	--	[C]	Energy production and conversion	NAD-dependent glycerol-3-phosphate dehydrogenase C-terminus;; NAD-dependent glycerol-3-phosphate dehydrogenase N-terminus	Uncharacterized protein OS=Glycine max (Soybean) PE=3 SV=1	C	Energy production and conversion	PREDICTED: probable glycerol-3-phosphate dehydrogenase [NAD(+)] 1, cytosolic-like [Cucumis sativus]
Csa4G005000	[O]	Posttranslational modification, protein turnover, chaperones	Biological Process: protein folding (GO:0006457);; Biological Process: response to stress (GO:0006950);; Biological Process: response to high light intensity (GO:0009644);; Biological Process: heat acclimation (GO:0010286);; Biological Process: response to hydrogen peroxide (GO:0042542);; Cellular Component: intracellular membrane-bounded organelle (GO:0043231);; Cellular Component: cytoplasmic p…	K13993|2.47388e-136|csv:101210969|26.5 kDa heat shock protein, mitochondrial-like; K13993 HSP20 family protein (A)	Protein processing in endoplasmic reticulum (ko04141)	[O]	Posttranslational modification, protein turnover, chaperones	Hsp20/alpha crystallin family	Putative uncharacterized protein OS=Glycine max (Soybean) PE=2 SV=1	O	Posttranslational modification, protein turnover, chaperones	PREDICTED: 26.5 kDa heat shock protein, mitochondrial-like [Cucumis sativus]
Csa1G023060	--	--	Biological Process: response to gibberellin (GO:0009739);; Biological Process: regulation of cellular process (GO:0050794);;	--	--	--	--	Protein of unknown function DUF260	Putative uncharacterized protein GN=VIT_17s0000g03720 OS=Vitis vinifera (Grape) PE=4 SV=1	S	Function unknown	PREDICTED: LOB domain-containing protein 41-like [Cucumis sativus]
Csa6G000690	[RTKL]	General function prediction only;; Signal transduction mechanisms;; Transcription;; Replication, recombination and repair	Molecular Function: nucleotide binding (GO:0000166);; Molecular Function: protein kinase activity (GO:0004672);; Biological Process: phosphorylation (GO:0016310);;	--	--	[T]	Signal transduction mechanisms	Protein kinase domain;; Protein tyrosine kinase	Putative uncharacterized protein GN=VIT_05s0020g00730 OS=Vitis vinifera (Grape) PE=3 SV=1	T	Signal transduction mechanisms	PREDICTED: probable receptor-like protein kinase At5g18500-like [Cucumis sativus]
Csa4G051410	--	--	Cellular Component: intracellular membrane-bounded organelle (GO:0043231);; Cellular Component: cytoplasmic part (GO:0044444);;	--	--	--	--	--	Predicted protein GN=POPTRDRAFT_554465 OS=Populus trichocarpa (Western balsam poplar) PE=4 SV=1	S	Function unknown	PREDICTED: uncharacterized protein LOC101204981 [Cucumis sativus]
Cucumber_newGene_1222	--	--	Cellular Component: mitochondrion (GO:0005739);;	--	--	--	--	--	--	S	Function unknown	hypothetical protein Csa_1G615180 [Cucumis sativus]
Csa5G593340	--	--	Molecular Function: phospholipid binding (GO:0005543);; Molecular Function: oxysterol binding (GO:0008142);; Biological Process: steroid metabolic process (GO:0008202);;	--	--	[I]	Lipid transport and metabolism	Oxysterol-binding protein;; Pleckstrin homology domain;; PH domain	Uncharacterized protein GN=PRUPE_ppa001529mg OS=Prunus persica (Peach) PE=4 SV=1	T	Signal transduction mechanisms	PREDICTED: oxysterol-binding protein-related protein 1D-like [Cucumis sativus]
Csa6G367090	--	--	Molecular Function: sequence-specific DNA binding transcription factor activity (GO:0003700);; Molecular Function: binding (GO:0005488);; Cellular Component: nucleus (GO:0005634);; Biological Process: regulation of transcription, DNA-templated (GO:0006355);; Molecular Function: 2-alkenal reductase [NAD(P)] activity (GO:0032440);; Biological Process: oxidation-reduction process (GO:0055114);;	K09264|1.56761e-89|csv:101228583|floral homeotic protein APETALA 1-like; K09264 MADS-box transcription factor, plant (A)	--	[K]	Transcription	K-box region	Mads box protein, putative GN=RCOM_1619830 OS=Ricinus communis (Castor bean) PE=4 SV=1	K	Transcription	PREDICTED: floral homeotic protein APETALA 1-like [Cucumis sativus]
Csa6G538680	[O]	Posttranslational modification, protein turnover, chaperones	Biological Process: protein peptidyl-prolyl isomerization (GO:0000413);; Molecular Function: peptidyl-prolyl cis-trans isomerase activity (GO:0003755);; Molecular Function: protein binding (GO:0005515);; Molecular Function: FK506 binding (GO:0005528);; Biological Process: protein folding (GO:0006457);; Biological Process: unsaturated fatty acid biosynthetic process (GO:0006636);; Cellular Compone…	K01802|6.39e-126|csv:101221114|peptidyl-prolyl cis-trans isomerase FKBP13, chloroplastic-like; K01802 peptidylprolyl isomerase [EC:5.2.1.8] (A)	--	[O]	Posttranslational modification, protein turnover, chaperones	FKBP-type peptidyl-prolyl cis-trans isomerase	Uncharacterized protein GN=PRUPE_ppa011219mg OS=Prunus persica (Peach) PE=4 SV=1	O	Posttranslational modification, protein turnover, chaperones	PREDICTED: peptidyl-prolyl cis-trans isomerase FKBP13, chloroplastic-like isoform 1 [Cucumis sativus]
Csa1G696500	[R]	General function prediction only	Molecular Function: catalytic activity (GO:0003824);; Biological Process: cellular metabolic process (GO:0044237);; Biological Process: primary metabolic process (GO:0044238);; Biological Process: organic substance metabolic process (GO:0071704);;	--	--	--	--	U-box domain;; WD domain, G-beta repeat;; Zinc-finger of the MIZ type in Nse subunit	Uncharacterized protein GN=PRUPE_ppa000309mg OS=Prunus persica (Peach) PE=4 SV=1	R	General function prediction only	PREDICTED: putative E3 ubiquitin-protein ligase LIN-like [Cucumis sativus]
Csa3G623950	[O]	Posttranslational modification, protein turnover, chaperones	Molecular Function: ATP binding (GO:0005524);; Cellular Component: cytoplasm (GO:0005737);; Cellular Component: cytosol (GO:0005829);; Cellular Component: plasma membrane (GO:0005886);; Biological Process: gluconeogenesis (GO:0006094);; Biological Process: glycolytic process (GO:0006096);; Biological Process: ATP catabolic process (GO:0006200);; Biological Process: fatty acid beta-oxidation (GO:0…	K03062|0|csv:101229315|26S proteasome regulatory subunit 4 homolog B-like; K03062 26S proteasome regulatory subunit T2 (A)	Proteasome (ko03050)	[O]	Posttranslational modification, protein turnover, chaperones	ATPase family associated with various cellular activities (AAA);; AAA domain;; AAA domain (Cdc48 subfamily);; AAA domain (dynein-related subfamily);; Protein of unknown function (DUF815)	Regulatory particle triple-A ATPase 2 GN=RPT2 OS=Sophora flavescens (Ku shen) PE=2 SV=1	O	Posttranslational modification, protein turnover, chaperones	PREDICTED: 26S proteasome regulatory subunit 4 homolog B-like [Cucumis sativus]
Csa5G577980	--	--	Cellular Component: cytoplasm (GO:0005737);;	K10268|0|csv:101215058|F-box/LRR-repeat protein 20-like; K10268 F-box and leucine-rich repeat protein 2/20 (A)	--	[R]	General function prediction only	Leucine Rich repeat;; Leucine Rich repeats (2 copies);; Leucine Rich Repeat;; Leucine rich repeat;; Leucine rich repeat	Uncharacterized protein GN=PRUPE_ppa006391mg OS=Prunus persica (Peach) PE=4 SV=1	R	General function prediction only	PREDICTED: F-box/LRR-repeat protein 20-like [Cucumis sativus]
Csa1G000570	[H]	Coenzyme transport and metabolism	Biological Process: rRNA processing (GO:0006364);; Cellular Component: chloroplast thylakoid membrane (GO:0009535);; Cellular Component: chloroplast envelope (GO:0009941);; Biological Process: regulation of proton transport (GO:0010155);; Biological Process: photosynthesis (GO:0015979);; Biological Process: chlorophyll biosynthetic process (GO:0015995);; Biological Process: isopentenyl diphosphat…	K03428|0|csv:101206600|magnesium-protoporphyrin O-methyltransferase-like; K03428 magnesium-protoporphyrin O-methyltransferase [EC:2.1.1.11] (A)	Porphyrin and chlorophyll metabolism (ko00860)	[H]	Coenzyme transport and metabolism	Magnesium-protoporphyrin IX methyltransferase C-terminus;; Methyltransferase domain;; Methyltransferase domain;; Methyltransferase domain;; Methyltransferase domain;; Methyltransferase domain;; Methyltransferase domain;; Methyltransferase small domain;; Putative RNA methylase family UPF0020;; Ribosomal RNA methyltransferase (FmrO);; Ribosomal protein L11 methyltransferase (PrmA)	Magnesium-protoporphyrin O-methyltransferase OS=Cucumis melo subsp. melo PE=4 SV=1	H	Coenzyme transport and metabolism	PREDICTED: magnesium-protoporphyrin O-methyltransferase-like [Cucumis sativus]
Csa1G064870	[RTKL]	General function prediction only;; Signal transduction mechanisms;; Transcription;; Replication, recombination and repair	Molecular Function: kinase activity (GO:0016301);;	--	--	--	--	Salt stress response/antifungal;; Protein kinase domain;; Protein tyrosine kinase	Cysteine-rich receptor-like protein kinase (Fragment) GN=MTR_116s0032 OS=Medicago truncatula (Barrel medic) PE=3 SV=1	T	Signal transduction mechanisms	PREDICTED: cysteine-rich receptor-like protein kinase 29-like [Cucumis sativus]
Csa1G181480	[F]	Nucleotide transport and metabolism	Molecular Function: thymidine kinase activity (GO:0004797);; Molecular Function: ATP binding (GO:0005524);; Cellular Component: mitochondrion (GO:0005739);; Biological Process: DNA replication (GO:0006260);; Biological Process: nucleotide biosynthetic process (GO:0009165);; Cellular Component: chloroplast (GO:0009507);; Biological Process: phosphorylation (GO:0016310);; Molecular Function: metal …	K00857|0|cmo:103501719|thymidine kinase-like; K00857 thymidine kinase [EC:2.7.1.21] (A)	Pyrimidine metabolism (ko00240)	[F]	Nucleotide transport and metabolism	Thymidine kinase	Thymidine kinase OS=Lotus japonicus (Lotus corniculatus var. japonicus) PE=2 SV=1	F	Nucleotide transport and metabolism	PREDICTED: thymidine kinase-like [Cucumis sativus]
Csa1G572450	[I]	Lipid transport and metabolism	Biological Process: response to ethylene (GO:0009723);; Biological Process: response to abscisic acid (GO:0009737);; Biological Process: seed germination (GO:0009845);; Biological Process: salicylic acid mediated signaling pathway (GO:0009863);; Biological Process: jasmonic acid mediated signaling pathway (GO:0009867);; Biological Process: positive regulation of gibberellic acid mediated signalin…	K14493|0|cmo:103492211|gibberellin receptor GID1C; K14493 gibberellin receptor GID1 [EC:3.-.-.-] (A)	Plant hormone signal transduction (ko04075)	[V]	Defense mechanisms	alpha/beta hydrolase fold;; Carboxylesterase family	Putative gibberellin receptor GN=GID1a/c OS=Cucurbita maxima (Pumpkin) PE=2 SV=1	T	Signal transduction mechanisms	PREDICTED: gibberellin receptor GID1C-like [Cucumis sativus]
Csa4G001770	--	--	--	--	--	--	--	--	Uncharacterized protein GN=PRUPE_ppa009673mg OS=Prunus persica (Peach) PE=4 SV=1	S	Function unknown	PREDICTED: uncharacterized protein LOC101206482 [Cucumis sativus]
Csa1G005500	--	--	Biological Process: RNA splicing, via endonucleolytic cleavage and ligation (GO:0000394);; Molecular Function: protein serine/threonine kinase activity (GO:0004674);; Molecular Function: protein serine/threonine/tyrosine kinase activity (GO:0004712);; Molecular Function: non-membrane spanning protein tyrosine kinase activity (GO:0004715);; Molecular Function: ATP binding (GO:0005524);; Cellular C…	--	--	[T]	Signal transduction mechanisms	Protein tyrosine kinase;; Protein kinase domain	Putative uncharacterized protein GN=VIT_17s0000g08140 OS=Vitis vinifera (Grape) PE=2 SV=1	T	Signal transduction mechanisms	PREDICTED: serine/threonine-protein kinase HT1-like [Cucumis sativus]
Csa2G271440	--	--	Molecular Function: catalytic activity (GO:0003824);;	--	--	--	--	--	Uncharacterized protein (Fragment) GN=PRUPE_ppa022032mg OS=Prunus persica (Peach) PE=4 SV=1	--	--	hypothetical protein PRUPE_ppa022032mg, partial [Prunus persica]
Csa3G781580	--	--	Cellular Component: nucleosome (GO:0000786);; Molecular Function: DNA binding (GO:0003677);; Molecular Function: structural constituent of ribosome (GO:0003735);; Cellular Component: ribosome (GO:0005840);; Biological Process: nucleosome assembly (GO:0006334);; Biological Process: translation (GO:0006412);;	--	--	--	--	--	Uncharacterized protein (Fragment) GN=OB04G17350 OS=Oryza brachyantha PE=4 SV=1	--	--	hypothetical protein MTR_5g032980 [Medicago truncatula]
Csa1G041530	[J]	Translation, ribosomal structure and biogenesis	Biological Process: RNA methylation (GO:0001510);; Molecular Function: RNA binding (GO:0003723);; Cellular Component: nucleolus (GO:0005730);; Biological Process: nucleotide biosynthetic process (GO:0009165);; Biological Process: regulation of flower development (GO:0009909);; Cellular Component: ribonucleoprotein complex (GO:0030529);; Biological Process: histone lysine methylation (GO:0034968);;	K11129|4.93009e-87|csv:101224234|H/ACA ribonucleoprotein complex subunit 2-like protein-like; K11129 H/ACA ribonucleoprotein complex subunit 2 (A)	Ribosome biogenesis in eukaryotes (ko03008)	[A]	RNA processing and modification	Ribosomal protein L7Ae/L30e/S12e/Gadd45 family	Uncharacterized protein OS=Glycine max (Soybean) PE=2 SV=1	A	RNA processing and modification	PREDICTED: H/ACA ribonucleoprotein complex subunit 2-like protein-like [Cucumis sativus]
Csa2G246540	--	--	Biological Process: response to molecule of bacterial origin (GO:0002237);; Molecular Function: protein serine/threonine kinase activity (GO:0004674);; Molecular Function: ATP binding (GO:0005524);; Cellular Component: plasma membrane (GO:0005886);; Biological Process: protein phosphorylation (GO:0006468);; Biological Process: transmembrane receptor protein tyrosine kinase signaling pathway (GO:0…	--	--	--	--	Leucine rich repeat;; Leucine Rich repeats (2 copies);; Protein tyrosine kinase;; Leucine Rich Repeat;; Protein kinase domain;; Leucine rich repeat;; Leucine Rich repeat	Uncharacterized protein GN=PRUPE_ppa001025mg OS=Prunus persica (Peach) PE=4 SV=1	T	Signal transduction mechanisms	PREDICTED: probable LRR receptor-like serine/threonine-protein kinase At2g16250-like [Cucumis sativus]
Csa3G643770	[Q]	Secondary metabolites biosynthesis, transport and catabolism	Molecular Function: iron ion binding (GO:0005506);; Molecular Function: electron carrier activity (GO:0009055);; Molecular Function: heme binding (GO:0020037);; Molecular Function: flavonoid 3',5'-hydroxylase activity (GO:0033772);; Biological Process: oxidation-reduction process (GO:0055114);;	--	--	[Q]	Secondary metabolites biosynthesis, transport and catabolism	Cytochrome P450	Putative uncharacterized protein GN=VIT_09s0002g01090 OS=Vitis vinifera (Grape) PE=2 SV=1	Q	Secondary metabolites biosynthesis, transport and catabolism	PREDICTED: flavonoid 3&apos;-monooxygenase-like [Cucumis sativus]
Csa1G418240	--	--	Biological Process: acetyl-CoA metabolic process (GO:0006084);; Biological Process: fatty acid biosynthetic process (GO:0006633);; Biological Process: calcium ion transport (GO:0006816);; Biological Process: Golgi organization (GO:0007030);; Biological Process: response to cold (GO:0009409);; Biological Process: response to light stimulus (GO:0009416);; Biological Process: response to salt stress…	K15397|0|csv:101213684|3-ketoacyl-CoA synthase 11-like; K15397 3-ketoacyl-CoA synthase [EC:2.3.1.199] (A)	Fatty acid elongation (ko00062)	--	--	FAE1/Type III polyketide synthase-like protein;; 3-Oxoacyl-[acyl-carrier-protein (ACP)] synthase III C terminal;; Chalcone and stilbene synthases, C-terminal domain;; Chalcone and stilbene synthases, N-terminal domain	Uncharacterized protein GN=PRUPE_ppa004269mg OS=Prunus persica (Peach) PE=4 SV=1	I	Lipid transport and metabolism	PREDICTED: 3-ketoacyl-CoA synthase 11-like [Cucumis sativus]
Csa1G097670	--	--	--	--	--	--	--	Shugoshin C terminus	Shugoshin-1, putative GN=RCOM_0474400 OS=Ricinus communis (Castor bean) PE=4 SV=1	S	Function unknown	PREDICTED: uncharacterized protein LOC101205365 [Cucumis sativus]
Csa2G385000	[R]	General function prediction only	Molecular Function: nucleotide binding (GO:0000166);; Cellular Component: endoplasmic reticulum (GO:0005783);; Cellular Component: plasma membrane (GO:0005886);; Biological Process: protein targeting to membrane (GO:0006612);; Biological Process: phosphate ion transport (GO:0006817);; Biological Process: nucleotide transport (GO:0006862);; Biological Process: ER to Golgi vesicle-mediated transpor…	K14003|0|csv:101206127|SEC12-like protein 1-like; K14003 prolactin regulatory element-binding protein (A)	Protein processing in endoplasmic reticulum (ko04141)	[U]	Intracellular trafficking, secretion, and vesicular transport	WD domain, G-beta repeat	Uncharacterized protein GN=PRUPE_ppa006719mg OS=Prunus persica (Peach) PE=4 SV=1	U	Intracellular trafficking, secretion, and vesicular transport	PREDICTED: SEC12-like protein 1-like [Cucumis sativus]
Csa5G576760	[RTKL]	General function prediction only;; Signal transduction mechanisms;; Transcription;; Replication, recombination and repair	Molecular Function: protein serine/threonine kinase activity (GO:0004674);; Molecular Function: ATP binding (GO:0005524);; Cellular Component: plasma membrane (GO:0005886);; Biological Process: methylation-dependent chromatin silencing (GO:0006346);; Biological Process: protein phosphorylation (GO:0006468);; Biological Process: transmembrane receptor protein tyrosine kinase signaling pathway (GO:…	--	--	--	--	Protein kinase domain;; Protein tyrosine kinase;; Leucine Rich Repeat;; Leucine Rich repeats (2 copies);; Leucine rich repeat;; Leucine rich repeat N-terminal domain;; Leucine Rich repeat	Uncharacterized protein GN=PRUPE_ppa002204mg OS=Prunus persica (Peach) PE=4 SV=1	T	Signal transduction mechanisms	PREDICTED: probable inactive leucine-rich repeat receptor-like protein kinase At1g66830-like [Cucumis sativus]
Csa4G046680	--	--	--	--	--	--	--	--	Putative uncharacterized protein GN=VIT_04s0023g01890 OS=Vitis vinifera (Grape) PE=4 SV=1	S	Function unknown	PREDICTED: late embryogenesis abundant protein D-29-like [Cucumis sativus]
Csa2G251510	--	--	Biological Process: carbohydrate metabolic process (GO:0005975);; Molecular Function: cellulase activity (GO:0008810);;	K01179|0|cmo:103499723|endoglucanase 24-like; K01179 endoglucanase [EC:3.2.1.4] (A)	Starch and sucrose metabolism (ko00500)	--	--	Glycosyl hydrolase family 9	Endo-1,4-beta-glucanase GN=GH9B10 OS=Populus trichocarpa (Western balsam poplar) PE=2 SV=1	G	Carbohydrate transport and metabolism	PREDICTED: endoglucanase 24-like [Cucumis sativus]
Csa5G167060	--	--	--	--	--	--	--	--	Putative uncharacterized protein GN=RCOM_0969780 OS=Ricinus communis (Castor bean) PE=4 SV=1	S	Function unknown	Uncharacterized protein isoform 2 [Theobroma cacao]
Csa3G011860	[Q]	Secondary metabolites biosynthesis, transport and catabolism	Molecular Function: binding (GO:0005488);; Molecular Function: oxidoreductase activity (GO:0016491);;	K04123|0|cmo:103490801|beta-amyrin 11-oxidase-like; K04123 ent-kaurenoic acid hydroxylase [EC:1.14.13.79] (A)	Diterpenoid biosynthesis (ko00904)	[QI]	Secondary metabolites biosynthesis, transport and catabolism;; Lipid transport and metabolism	Cytochrome P450	Cytochrome P450 88D3 GN=CYP88D3 OS=Medicago truncatula (Barrel medic) PE=2 SV=1	Q	Secondary metabolites biosynthesis, transport and catabolism	PREDICTED: beta-amyrin 11-oxidase-like [Cucumis sativus]
Csa5G409690	[R]	General function prediction only	Molecular Function: inward rectifier potassium channel activity (GO:0005242);; Cellular Component: nucleus (GO:0005634);; Biological Process: potassium ion transport (GO:0006813);; Biological Process: response to cold (GO:0009409);; Biological Process: response to water deprivation (GO:0009414);; Biological Process: response to abscisic acid (GO:0009737);; Biological Process: response to jasmonic…	--	--	[PT]	Inorganic ion transport and metabolism;; Signal transduction mechanisms	Ankyrin repeats (3 copies);; Ankyrin repeat;; Ankyrin repeats (many copies);; Ankyrin repeats (many copies);; Ankyrin repeat;; Cyclic nucleotide-binding domain;; Ion transport protein;; Domain of unknown function (DUF3354);; Ion channel	Uncharacterized protein OS=Glycine max (Soybean) PE=4 SV=1	P	Inorganic ion transport and metabolism	PREDICTED: potassium channel SKOR-like [Cucumis sativus]
Csa1G629130	--	--	Biological Process: petal formation (GO:0048451);; Biological Process: sepal formation (GO:0048453);;	--	--	[R]	General function prediction only	PPR repeat family;; PPR repeat;; PPR repeat;; Pentatricopeptide repeat domain	Uncharacterized protein GN=PGSC0003DMG400022317 OS=Solanum tuberosum (Potato) PE=4 SV=1	R	General function prediction only	PREDICTED: pentatricopeptide repeat-containing protein At4g28010-like [Vitis vinifera]
Csa1G590270	[E]	Amino acid transport and metabolism	Molecular Function: threonine synthase activity (GO:0004795);; Cellular Component: cytosol (GO:0005829);; Biological Process: threonine biosynthetic process (GO:0009088);; Cellular Component: chloroplast stroma (GO:0009570);; Molecular Function: pyridoxal phosphate binding (GO:0030170);;	K01733|0|csv:101204787|threonine synthase, chloroplastic-like; K01733 threonine synthase [EC:4.2.3.1] (A)	Glycine, serine and threonine metabolism (ko00260);; Vitamin B6 metabolism (ko00750);; Biosynthesis of amino acids (ko01230)	--	--	Pyridoxal-phosphate dependent enzyme	Threonine synthase, putative GN=RCOM_1046290 OS=Ricinus communis (Castor bean) PE=4 SV=1	E	Amino acid transport and metabolism	PREDICTED: threonine synthase, chloroplastic-like [Cucumis sativus]
Csa3G750930	--	--	Biological Process: regionalization (GO:0003002);; Cellular Component: nucleus (GO:0005634);; Biological Process: transcription, DNA-templated (GO:0006351);; Biological Process: pattern specification process (GO:0007389);; Biological Process: post-embryonic morphogenesis (GO:0009886);; Biological Process: organ morphogenesis (GO:0009887);; Biological Process: regulation of flower development (GO:…	--	--	[K]	Transcription	Myb/SANT-like DNA-binding domain	Uncharacterized protein (Fragment) GN=PRUPE_ppa024278mg OS=Prunus persica (Peach) PE=4 SV=1	K	Transcription	PREDICTED: trihelix transcription factor GT-2-like [Cucumis sativus]
Csa3G710810	--	--	Molecular Function: copper ion binding (GO:0005507);; Molecular Function: electron carrier activity (GO:0009055);; Cellular Component: cytoplasmic membrane-bounded vesicle (GO:0016023);;	--	--	--	--	Plastocyanin-like domain	Uncharacterized protein OS=Glycine max (Soybean) PE=2 SV=1	R	General function prediction only	PREDICTED: lamin-like protein-like [Cucumis sativus]
Csa2G337760	[G]	Carbohydrate transport and metabolism	Molecular Function: beta-galactosidase activity (GO:0004565);; Biological Process: carbohydrate metabolic process (GO:0005975);; Cellular Component: plant-type cell wall (GO:0009505);; Cellular Component: cytoplasmic membrane-bounded vesicle (GO:0016023);; Molecular Function: carbohydrate binding (GO:0030246);; Molecular Function: cation binding (GO:0043169);;	--	--	[G]	Carbohydrate transport and metabolism	Glycosyl hydrolases family 35;; Galactose binding lectin domain;; Beta-galactosidase jelly roll domain	Beta-galactosidase GN=VIT_07s0031g02480 OS=Vitis vinifera (Grape) PE=3 SV=1	G	Carbohydrate transport and metabolism	PREDICTED: beta-galactosidase 3-like [Cucumis sativus]
Csa3G588530	[F]	Nucleotide transport and metabolism	Biological Process: nucleobase-containing compound metabolic process (GO:0006139);; Biological Process: DNA-templated transcription, elongation (GO:0006354);; Molecular Function: nucleotide kinase activity (GO:0019201);; Molecular Function: nucleobase-containing compound kinase activity (GO:0019205);;	K00939|0|csv:101217918|probable adenylate kinase 1, chloroplastic-like; K00939 adenylate kinase [EC:2.7.4.3] (A)	Purine metabolism (ko00230)	[F]	Nucleotide transport and metabolism	Adenylate kinase	Putative uncharacterized protein GN=VIT_14s0171g00160 OS=Vitis vinifera (Grape) PE=3 SV=1	F	Nucleotide transport and metabolism	PREDICTED: probable adenylate kinase 1, chloroplastic-like [Cucumis sativus]
Csa1G074400	--	--	--	--	--	--	--	Helix-loop-helix DNA-binding domain	Putative uncharacterized protein GN=VITISV_010916 OS=Vitis vinifera (Grape) PE=4 SV=1	K	Transcription	PREDICTED: transcription factor bHLH118-like [Cucumis sativus]
Csa3G222790	[C]	Energy production and conversion	Biological Process: pentose-phosphate shunt (GO:0006098);; Molecular Function: electron carrier activity (GO:0009055);; Cellular Component: chloroplast (GO:0009507);; Cellular Component: chloroplast stroma (GO:0009570);; Biological Process: response to abiotic stimulus (GO:0009628);; Biological Process: abscisic acid biosynthetic process (GO:0009688);; Biological Process: electron transport chain…	K02639|3.80758e-95|csv:101204727|ferredoxin-1, chloroplastic-like; K02639 ferredoxin (A)	Photosynthesis (ko00195)	--	--	2Fe-2S iron-sulfur cluster binding domain	Chloroplast ferredoxin I OS=Camellia sinensis (Tea) PE=2 SV=1	C	Energy production and conversion	PREDICTED: ferredoxin-1, chloroplastic-like [Cucumis sativus]
Csa2G232490	--	--	Molecular Function: phospholipid binding (GO:0005543);; Biological Process: signal transduction (GO:0007165);; Biological Process: protein localization (GO:0008104);; Cellular Component: plasmodesma (GO:0009506);; Cellular Component: chloroplast (GO:0009507);; Molecular Function: phosphatidylinositol binding (GO:0035091);;	--	--	[U]	Intracellular trafficking, secretion, and vesicular transport	--	Uncharacterized protein OS=Glycine max (Soybean) PE=4 SV=1	U	Intracellular trafficking, secretion, and vesicular transport	PREDICTED: LOW QUALITY PROTEIN: uncharacterized protein LOC101213129 [Cucumis sativus]
Csa2G348860	--	--	Cellular Component: mitochondrion (GO:0005739);;	--	--	--	--	Plant protein 1589 of unknown function (A_thal_3526)	Predicted protein GN=POPTRDRAFT_565187 OS=Populus trichocarpa (Western balsam poplar) PE=4 SV=1	S	Function unknown	PREDICTED: uncharacterized LOC101211262 [Cucumis sativus]
Csa4G645970	--	--	Biological Process: single-organism process (GO:0044699);;	--	--	--	--	--	Predicted protein GN=POPTRDRAFT_561678 OS=Populus trichocarpa (Western balsam poplar) PE=4 SV=1	S	Function unknown	PREDICTED: uncharacterized protein LOC101207241 [Cucumis sativus]
Csa4G648020	[P]	Inorganic ion transport and metabolism	Molecular Function: copper-exporting ATPase activity (GO:0004008);; Molecular Function: ATP binding (GO:0005524);; Cellular Component: proteasome core complex (GO:0005839);; Cellular Component: plasma membrane (GO:0005886);; Biological Process: ubiquitin-dependent protein catabolic process (GO:0006511);; Biological Process: ATP biosynthetic process (GO:0006754);; Molecular Function: peptidase act…	K01533|0|csv:101214637|copper-transporting ATPase PAA2, chloroplastic-like; K01533 Cu2+-exporting ATPase [EC:3.6.3.4] (A)	--	[P]	Inorganic ion transport and metabolism	E1-E2 ATPase;; haloacid dehalogenase-like hydrolase;; haloacid dehalogenase-like hydrolase;; Heavy-metal-associated domain	Uncharacterized protein OS=Glycine max (Soybean) PE=3 SV=1	P	Inorganic ion transport and metabolism	PREDICTED: copper-transporting ATPase PAA2, chloroplastic-like isoform 2 [Cucumis sativus]
CsaUNG034390	[S]	Function unknown	--	--	--	--	--	Organiser of macrodomain of Terminus of chromosome	--	S	Function unknown	--
Csa4G286330	--	--	Molecular Function: structural molecule activity (GO:0005198);; Biological Process: pentose-phosphate shunt (GO:0006098);; Cellular Component: chloroplast thylakoid membrane (GO:0009535);; Cellular Component: chloroplast envelope (GO:0009941);; Biological Process: thylakoid membrane organization (GO:0010027);;	--	--	--	--	PAP_fibrillin	Predicted protein GN=POPTRDRAFT_844363 OS=Populus trichocarpa (Western balsam poplar) PE=2 SV=1	S	Function unknown	PREDICTED: probable plastid-lipid-associated protein 12, chloroplastic-like [Cucumis sativus]
Csa4G303070	--	--	--	--	--	--	--	--	Uncharacterized protein OS=Glycine max (Soybean) PE=4 SV=2	--	--	Uncharacterized protein TCM_021829 [Theobroma cacao]
Csa3G750390	--	--	--	--	--	--	--	Phytosulfokine precursor protein (PSK)	--	--	--	--
Csa3G238130	[R]	General function prediction only	--	--	--	[R]	General function prediction only	F-box-like;; F-box domain	Uncharacterized protein OS=Glycine max (Soybean) PE=2 SV=1	R	General function prediction only	PREDICTED: uncharacterized protein LOC101219018 [Cucumis sativus]
Csa5G643240	--	--	Cellular Component: nucleus (GO:0005634);; Cellular Component: plasma membrane (GO:0005886);; Biological Process: response to osmotic stress (GO:0006970);; Biological Process: response to water deprivation (GO:0009414);; Cellular Component: chloroplast (GO:0009507);; Biological Process: cold acclimation (GO:0009631);; Biological Process: response to abscisic acid (GO:0009737);; Biological Process…	--	--	--	--	--	Uncharacterized protein OS=Glycine max (Soybean) PE=4 SV=1	S	Function unknown	PREDICTED: uncharacterized protein LOC101209689 [Cucumis sativus]
Csa3G199550	--	--	Biological Process: myo-inositol hexakisphosphate biosynthetic process (GO:0010264);;	--	--	--	--	--	Putative uncharacterized protein GN=VIT_03s0091g00230 OS=Vitis vinifera (Grape) PE=4 SV=1	S	Function unknown	PREDICTED: uncharacterized protein LOC101204288 [Cucumis sativus]
Csa2G225310	--	--	Molecular Function: magnesium ion transmembrane transporter activity (GO:0015095);; Biological Process: magnesium ion transport (GO:0015693);; Cellular Component: membrane (GO:0016020);; Biological Process: transmembrane transport (GO:0055085);;	K16075|0|csv:101206420|magnesium transporter MRS2-I-like; K16075 magnesium transporter (A)	--	[P]	Inorganic ion transport and metabolism	CorA-like Mg2+ transporter protein	Putative uncharacterized protein GN=VIT_07s0141g00590 OS=Vitis vinifera (Grape) PE=4 SV=1	P	Inorganic ion transport and metabolism	PREDICTED: magnesium transporter MRS2-I-like [Cucumis sativus]
Csa3G176850	[O]	Posttranslational modification, protein turnover, chaperones	Cellular Component: vacuolar membrane (GO:0005774);; Cellular Component: Golgi apparatus (GO:0005794);; Cellular Component: plasma membrane (GO:0005886);; Cellular Component: plasmodesma (GO:0009506);; Molecular Function: isomerase activity (GO:0016853);; Biological Process: cellular protein metabolic process (GO:0044267);;	K14826|0|csv:101208577|peptidyl-prolyl cis-trans isomerase FKBP53-like; K14826 FK506-binding nuclear protein [EC:5.2.1.8] (A)	--	[C]	Energy production and conversion	SPFH domain / Band 7 family;; FKBP-type peptidyl-prolyl cis-trans isomerase	Peptidyl-prolyl cis-trans isomerase GN=RCOM_1499110 OS=Ricinus communis (Castor bean) PE=4 SV=1	O	Posttranslational modification, protein turnover, chaperones	PREDICTED: peptidyl-prolyl cis-trans isomerase FKBP53-like [Cucumis sativus]
Csa7G238400	--	--	Biological Process: response to auxin (GO:0009733);;	K14488|1.90444e-77|csv:101213583|auxin-induced protein X15-like; K14488 SAUR family protein (A)	Plant hormone signal transduction (ko04075)	--	--	Auxin responsive protein	Uncharacterized protein GN=PRUPE_ppa013119mg OS=Prunus persica (Peach) PE=4 SV=1	S	Function unknown	PREDICTED: auxin-induced protein X15-like [Cucumis sativus]
Csa5G612840	[G]	Carbohydrate transport and metabolism	Cellular Component: extracellular region (GO:0005576);; Cellular Component: plasma membrane (GO:0005886);; Biological Process: carbohydrate metabolic process (GO:0005975);; Molecular Function: beta-glucosidase activity (GO:0008422);; Cellular Component: anchored component of membrane (GO:0031225);;	K05349|0|csv:101209588|lysosomal beta glucosidase-like; K05349 beta-glucosidase [EC:3.2.1.21] (A)	Cyanoamino acid metabolism (ko00460);; Starch and sucrose metabolism (ko00500);; Phenylpropanoid biosynthesis (ko00940)	--	--	Glycosyl hydrolase family 3 N terminal domain;; Glycosyl hydrolase family 3 C-terminal domain	Uncharacterized protein OS=Glycine max (Soybean) PE=4 SV=2	G	Carbohydrate transport and metabolism	PREDICTED: lysosomal beta glucosidase-like [Cucumis sativus]
Csa4G001800	[MG]	Cell wall/membrane/envelope biogenesis;; Carbohydrate transport and metabolism	Cellular Component: Golgi membrane (GO:0000139);; Molecular Function: nucleotide binding (GO:0000166);; Cellular Component: endosome (GO:0005768);; Cellular Component: vacuolar membrane (GO:0005774);; Cellular Component: trans-Golgi network (GO:0005802);; Cellular Component: cytosol (GO:0005829);; Cellular Component: plasma membrane (GO:0005886);; Molecular Function: dTDP-glucose 4,6-dehydratase …	--	--	[GM]	Carbohydrate transport and metabolism;; Cell wall/membrane/envelope biogenesis	NAD dependent epimerase/dehydratase family;; 3-beta hydroxysteroid dehydrogenase/isomerase family;; RmlD substrate binding domain;; Male sterility protein;; Polysaccharide biosynthesis protein	Uncharacterized protein GN=PRUPE_ppa004626mg OS=Prunus persica (Peach) PE=4 SV=1	G	Carbohydrate transport and metabolism	PREDICTED: UDP-glucuronic acid decarboxylase 1-like [Cucumis sativus]
Csa3G168930	--	--	Molecular Function: sucrose alpha-glucosidase activity (GO:0004575);; Biological Process: ethylene biosynthetic process (GO:0009693);; Molecular Function: glycopeptide alpha-N-acetylgalactosaminidase activity (GO:0033926);;	--	--	--	--	Alkaline and neutral invertase;; Amylo-alpha-1,6-glucosidase	Beta-fructofuranosidase, putative GN=RCOM_1002060 OS=Ricinus communis (Castor bean) PE=4 SV=1	S	Function unknown	PREDICTED: uncharacterized protein LOC101231486 [Cucumis sativus]
Csa2G070310	[O]	Posttranslational modification, protein turnover, chaperones	Molecular Function: ATP binding (GO:0005524);; Cellular Component: cell wall (GO:0005618);; Cellular Component: cytosol (GO:0005829);; Cellular Component: plasma membrane (GO:0005886);; Biological Process: protein folding (GO:0006457);; Cellular Component: chloroplast (GO:0009507);; Biological Process: response to high light intensity (GO:0009644);; Biological Process: heat acclimation (GO:001028…	K03283|0|csv:101215564|heat shock 70 kDa protein-like; K03283 heat shock 70kDa protein 1/8 (A)	Spliceosome (ko03040);; Protein processing in endoplasmic reticulum (ko04141);; Endocytosis (ko04144)	[O]	Posttranslational modification, protein turnover, chaperones	Hsp70 protein;; NAD-specific glutamate dehydrogenase	Uncharacterized protein GN=PRUPE_ppa002595mg OS=Prunus persica (Peach) PE=4 SV=1	O	Posttranslational modification, protein turnover, chaperones	PREDICTED: heat shock 70 kDa protein-like [Cucumis sativus]
Csa4G219350	[Z]	Cytoskeleton	Molecular Function: microtubule motor activity (GO:0003777);; Molecular Function: ATP binding (GO:0005524);; Cellular Component: kinesin complex (GO:0005871);; Cellular Component: microtubule (GO:0005874);; Biological Process: microtubule-based movement (GO:0007018);; Molecular Function: microtubule binding (GO:0008017);;	K10406|0|cmo:103497262|kinesin-4; K10406 kinesin family member C2/C3 (A)	--	[Z]	Cytoskeleton	Kinesin motor domain	Kinesin-like protein OS=Cucumis melo subsp. melo PE=3 SV=1	Z	Cytoskeleton	PREDICTED: kinesin-4-like [Cucumis sativus]
Csa2G139800	--	--	Molecular Function: receptor activity (GO:0004872);; Cellular Component: mitochondrion (GO:0005739);; Cellular Component: endoplasmic reticulum (GO:0005783);; Cellular Component: endoplasmic reticulum membrane (GO:0005789);; Cellular Component: Golgi apparatus (GO:0005794);; Biological Process: acetyl-CoA metabolic process (GO:0006084);; Biological Process: protein retention in ER lumen (GO:00066…	K10949|3.23349e-155|csv:101214953|ER lumen protein retaining receptor-like; K10949 ER lumen protein retaining receptor (A)	--	[U]	Intracellular trafficking, secretion, and vesicular transport	ER lumen protein retaining receptor	ER lumen protein retaining receptor OS=Glycine max (Soybean) PE=2 SV=1	U	Intracellular trafficking, secretion, and vesicular transport	PREDICTED: ER lumen protein retaining receptor-like [Cucumis sativus]
Csa6G507050	--	--	Molecular Function: peptide receptor activity (GO:0001653);; Cellular Component: nucleus (GO:0005634);; Cellular Component: cytosol (GO:0005829);; Biological Process: gluconeogenesis (GO:0006094);; Biological Process: glycolytic process (GO:0006096);; Biological Process: DNA repair (GO:0006281);; Biological Process: regulation of transcription, DNA-templated (GO:0006355);; Biological Process: pro…	K03029|0|csv:101221273|26S proteasome non-ATPase regulatory subunit 4-like; K03029 26S proteasome regulatory subunit N10 (A)	Proteasome (ko03050)	[O]	Posttranslational modification, protein turnover, chaperones	Ubiquitin interaction motif;; von Willebrand factor type A domain	Uncharacterized protein OS=Glycine max (Soybean) PE=4 SV=1	O	Posttranslational modification, protein turnover, chaperones	PREDICTED: 26S proteasome non-ATPase regulatory subunit 4-like [Cucumis sativus]
Csa7G043680	[V]	Defense mechanisms	Cellular Component: vacuolar membrane (GO:0005774);; Cellular Component: plasma membrane (GO:0005886);; Biological Process: drug transmembrane transport (GO:0006855);; Biological Process: response to symbiotic fungus (GO:0009610);; Molecular Function: drug transmembrane transporter activity (GO:0015238);; Molecular Function: antiporter activity (GO:0015297);; Biological Process: proline transport…	K03327|0|cmo:103495592|protein TRANSPARENT TESTA 12-like; K03327 multidrug resistance protein, MATE family (A)	--	[R]	General function prediction only	MatE	Transparent testa 12 protein GN=MTR_2g088400 OS=Medicago truncatula (Barrel medic) PE=4 SV=1	S	Function unknown	PREDICTED: protein TRANSPARENT TESTA 12-like [Cucumis sativus]
Csa2G373470	[I]	Lipid transport and metabolism	Biological Process: response to chitin (GO:0010200);; Molecular Function: hydrolase activity (GO:0016787);;	--	--	[I]	Lipid transport and metabolism	Putative lysophospholipase;; Alpha/beta hydrolase family;; Alpha/beta hydrolase family;; alpha/beta hydrolase fold	Uncharacterized protein OS=Glycine max (Soybean) PE=4 SV=1	I	Lipid transport and metabolism	PREDICTED: monoglyceride lipase-like [Cucumis sativus]
Csa6G425690	[R]	General function prediction only	Molecular Function: nucleotide binding (GO:0000166);; Molecular Function: nucleic acid binding (GO:0003676);;	K13161|0|cmo:103491420|nucleolin; K13161 heterogeneous nuclear ribonucleoprotein R (A)	--	[A]	RNA processing and modification	RNA recognition motif. (a.k.a. RRM, RBD, or RNP domain);; RNA recognition motif (a.k.a. RRM, RBD, or RNP domain);; RNA recognition motif. (a.k.a. RRM, RBD, or RNP domain);; Limkain b1	Putative uncharacterized protein GN=VIT_06s0080g00470 OS=Vitis vinifera (Grape) PE=4 SV=1	R	General function prediction only	PREDICTED: uncharacterized protein LOC101228216 [Cucumis sativus]
Csa5G612860	--	--	Cellular Component: chloroplast envelope (GO:0009941);; Molecular Function: oxidoreductase activity, acting on the CH-CH group of donors (GO:0016627);;	--	--	[I]	Lipid transport and metabolism	3-oxo-5-alpha-steroid 4-dehydrogenase	Uncharacterized protein OS=Glycine max (Soybean) PE=4 SV=1	I	Lipid transport and metabolism	PREDICTED: steroid 5-alpha-reductase DET2-like [Cucumis sativus]
Csa6G133750	[RTKL]	General function prediction only;; Signal transduction mechanisms;; Transcription;; Replication, recombination and repair	Molecular Function: protein serine/threonine kinase activity (GO:0004674);; Molecular Function: protein tyrosine kinase activity (GO:0004713);; Molecular Function: ATP binding (GO:0005524);; Cellular Component: plasma membrane (GO:0005886);; Biological Process: acetyl-CoA metabolic process (GO:0006084);; Biological Process: protein phosphorylation (GO:0006468);; Biological Process: microtubule nu…	--	--	--	--	Protein kinase domain;; Protein tyrosine kinase;; Leucine rich repeat;; Leucine Rich repeats (2 copies);; Leucine Rich Repeat;; Leucine rich repeat N-terminal domain	Uncharacterized protein GN=PRUPE_ppa002781mg OS=Prunus persica (Peach) PE=4 SV=1	T	Signal transduction mechanisms	PREDICTED: probable inactive receptor kinase At5g58300-like [Cucumis sativus]
Csa2G368920	--	--	Cellular Component: nucleus (GO:0005634);;	--	--	[S]	Function unknown	--	Uncharacterized protein GN=PRUPE_ppa004853mg OS=Prunus persica (Peach) PE=4 SV=1	S	Function unknown	PREDICTED: uncharacterized protein LOC101202879 [Cucumis sativus]
Csa2G010160	--	--	Biological Process: defense response (GO:0006952);; Biological Process: defense response, incompatible interaction (GO:0009814);; Biological Process: regulation of biological process (GO:0050789);; Biological Process: response to other organism (GO:0051707);; Biological Process: cellular response to stimulus (GO:0051716);;	--	--	--	--	VQ motif	Predicted protein GN=POPTRDRAFT_796568 OS=Populus trichocarpa (Western balsam poplar) PE=4 SV=1	S	Function unknown	predicted protein [Populus trichocarpa]
Csa6G502650	[QR]	Secondary metabolites biosynthesis, transport and catabolism;; General function prediction only	Cellular Component: nucleus (GO:0005634);; Cellular Component: cytoplasm (GO:0005737);; Biological Process: fatty acid catabolic process (GO:0009062);; Biological Process: seed dormancy process (GO:0010162);;	--	--	[A]	RNA processing and modification	Putative methyltransferase	Predicted protein GN=POPTRDRAFT_1083525 OS=Populus trichocarpa (Western balsam poplar) PE=4 SV=1	A	RNA processing and modification	PREDICTED: methyltransferase-like protein 21C-like [Cucumis sativus]
Csa1G033120	[O]	Posttranslational modification, protein turnover, chaperones	Molecular Function: transferase activity (GO:0016740);; Molecular Function: lyase activity (GO:0016829);;	K00799|5.77558e-138|csv:101217019|glutathione S-transferase U9-like; K00799 glutathione S-transferase [EC:2.5.1.18] (A)	Glutathione metabolism (ko00480)	[O]	Posttranslational modification, protein turnover, chaperones	Glutathione S-transferase, N-terminal domain;; Glutathione S-transferase, N-terminal domain;; Glutathione S-transferase, N-terminal domain;; Glutathione S-transferase, C-terminal domain	Putative uncharacterized protein OS=Glycine max (Soybean) PE=2 SV=1	O	Posttranslational modification, protein turnover, chaperones	PREDICTED: glutathione S-transferase U9-like [Cucumis sativus]
Csa2G362390	--	--	Molecular Function: sequence-specific DNA binding transcription factor activity (GO:0003700);; Biological Process: regulation of transcription, DNA-templated (GO:0006355);; Molecular Function: sequence-specific DNA binding (GO:0043565);;	--	--	--	--	bZIP transcription factor;; Basic region leucine zipper	Ocs element-binding factor, putative GN=RCOM_1595650 OS=Ricinus communis (Castor bean) PE=4 SV=1	K	Transcription	PREDICTED: ocs element-binding factor 1-like [Cucumis sativus]
Csa6G124060	--	--	--	--	--	--	--	--	Uncharacterized protein OS=Glycine max (Soybean) PE=4 SV=1	S	Function unknown	PREDICTED: uncharacterized protein LOC100814540 [Glycine max]
Csa3G630280	--	--	Biological Process: transcription, DNA-templated (GO:0006351);;	--	--	--	--	AP2 domain	Putative uncharacterized protein GN=VITISV_009902 OS=Vitis vinifera (Grape) PE=4 SV=1	K	Transcription	PREDICTED: uncharacterized protein LOC101214735 [Cucumis sativus]
Cucumber_newGene_31	[MG]	Cell wall/membrane/envelope biogenesis;; Carbohydrate transport and metabolism	Molecular Function: nucleotide binding (GO:0000166);; Cellular Component: vacuole (GO:0005773);; Cellular Component: chloroplast stroma (GO:0009570);; Biological Process: stomatal complex morphogenesis (GO:0010103);; Biological Process: mRNA modification (GO:0016556);;	--	--	[G]	Carbohydrate transport and metabolism	NADH(P)-binding;; Complex I intermediate-associated protein 30 (CIA30);; NADH(P)-binding;; NmrA-like family	Probable complex I intermediate-associated protein 30 GN=At1g17350 OS=Arabidopsis thaliana (Mouse-ear cress) PE=1 SV=2	G	Carbohydrate transport and metabolism	PREDICTED: uncharacterized LOC101203416 [Cucumis sativus]
Csa5G161990	[FGR]	Nucleotide transport and metabolism;; Carbohydrate transport and metabolism;; General function prediction only	Molecular Function: nucleotide binding (GO:0000166);; Molecular Function: sulfate adenylyltransferase (ADP) activity (GO:0004780);; Cellular Component: nucleus (GO:0005634);; Cellular Component: mitochondrion (GO:0005739);; Cellular Component: peroxisome (GO:0005777);; Biological Process: sulfur compound metabolic process (GO:0006790);; Biological Process: purine ribonucleotide metabolic process …	--	--	[R]	General function prediction only	Scavenger mRNA decapping enzyme C-term binding;; HIT domain	Uncharacterized protein GN=PRUPE_ppa012871mg OS=Prunus persica (Peach) PE=4 SV=1	R	General function prediction only	PREDICTED: histidine triad nucleotide-binding protein 3-like [Cucumis sativus]
Csa7G049270	--	--	Biological Process: microtubule cytoskeleton organization (GO:0000226);; Biological Process: cytokinesis by cell plate formation (GO:0000911);; Cellular Component: nucleus (GO:0005634);; Cellular Component: spindle (GO:0005819);; Cellular Component: microtubule (GO:0005874);; Biological Process: DNA-dependent DNA replication (GO:0006261);; Biological Process: DNA replication initiation (GO:000627…	K16812|0|csv:101211649|uncharacterized LOC101211649; K16812 targeting protein for Xklp2 (A)	--	--	--	Cell cycle regulated microtubule associated protein;; Targeting protein for Xklp2 (TPX2)	Putative uncharacterized protein OS=Cucurbita maxima (Pumpkin) PE=2 SV=1	S	Function unknown	PREDICTED: uncharacterized protein LOC101211649 [Cucumis sativus]
Csa2G381710	--	--	--	--	--	--	--	--	Putative uncharacterized protein GN=RCOM_0924350 OS=Ricinus communis (Castor bean) PE=4 SV=1	S	Function unknown	PREDICTED: uncharacterized protein LOC101208140 [Cucumis sativus]
Csa6G028940	--	--	Biological Process: single-organism cellular process (GO:0044763);; Biological Process: regulation of biological process (GO:0050789);; Biological Process: response to stimulus (GO:0050896);;	--	--	--	--	--	Uncharacterized protein GN=Solyc05g009420.1 OS=Solanum lycopersicum (Tomato) PE=4 SV=1	S	Function unknown	PREDICTED: uncharacterized protein LOC101255885 [Solanum lycopersicum]
Csa2G010180	--	--	--	--	--	--	--	--	Uncharacterized protein OS=Glycine max (Soybean) PE=4 SV=1	R	General function prediction only	predicted protein [Populus trichocarpa]
Csa6G516980	--	--	Cellular Component: extracellular region (GO:0005576);;	--	--	--	--	--	Predicted protein GN=POPTRDRAFT_555520 OS=Populus trichocarpa (Western balsam poplar) PE=4 SV=1	R	General function prediction only	PREDICTED: uncharacterized protein LOC101210650 [Cucumis sativus]
Csa1G077140	--	--	--	--	--	--	--	--	Uncharacterized protein OS=Glycine max (Soybean) PE=4 SV=1	--	--	PREDICTED: uncharacterized protein DDB_G0271670-like [Cicer arietinum]
Cucumber_newGene_384	--	--	Biological Process: aromatic amino acid family biosynthetic process (GO:0009073);; Cellular Component: chloroplast (GO:0009507);; Biological Process: photosystem II assembly (GO:0010207);; Biological Process: iron-sulfur cluster assembly (GO:0016226);; Biological Process: positive regulation of transcription, DNA-templated (GO:0045893);;	--	--	--	--	--	--	S	Function unknown	PREDICTED: uncharacterized protein LOC103484146 [Cucumis melo]
Cucumber_newGene_67	--	--	--	--	--	--	--	--	--	--	--	PREDICTED: uncharacterized protein LOC101217312 [Cucumis sativus]
Csa6G446310	--	--	--	--	--	--	--	--	Putative uncharacterized protein GN=RCOM_1355450 OS=Ricinus communis (Castor bean) PE=4 SV=1	S	Function unknown	PREDICTED: uncharacterized protein LOC101222329 [Cucumis sativus]
Csa5G602230	--	--	--	--	--	--	--	bHLH-MYC and R2R3-MYB transcription factors N-terminal	Putative uncharacterized protein GN=RCOM_0993660 OS=Ricinus communis (Castor bean) PE=4 SV=1	S	Function unknown	PREDICTED: uncharacterized protein LOC101212200 [Cucumis sativus]
Csa3G184590	--	--	--	--	--	--	--	--	Predicted protein GN=POPTRDRAFT_569438 OS=Populus trichocarpa (Western balsam poplar) PE=4 SV=1	S	Function unknown	PREDICTED: probable membrane-associated kinase regulator 5-like [Cucumis sativus]
Csa7G372910	--	--	--	--	--	--	--	Potato inhibitor I family;; Peptidase inhibitor I78 family	Uncharacterized protein GN=PRUPE_ppa018391mg OS=Prunus persica (Peach) PE=4 SV=1	R	General function prediction only	Serine protease inhibitor [Theobroma cacao]
Csa4G593920	--	--	Biological Process: mitotic cell cycle (GO:0000278);; Molecular Function: mRNA binding (GO:0003729);; Cellular Component: nucleus (GO:0005634);; Biological Process: mRNA processing (GO:0006397);; Biological Process: gravitropism (GO:0009630);; Biological Process: RNA 3'-end processing (GO:0031123);; Biological Process: negative regulation of transcription, DNA-templated (GO:0045892);;	K14408|8.9308e-29|cmo:103486027|cleavage stimulation factor subunit 3; K14408 cleavage stimulation factor subunit 3 (A)	mRNA surveillance pathway (ko03015)	[A]	RNA processing and modification	--	Uncharacterized protein OS=Lotus japonicus (Lotus corniculatus var. japonicus) PE=4 SV=1	A	RNA processing and modification	PREDICTED: cleavage stimulation factor subunit 3-like [Cucumis sativus]
Csa5G011670	--	--	Molecular Function: double-stranded RNA binding (GO:0003725);; Molecular Function: ribonuclease III activity (GO:0004525);; Cellular Component: nucleus (GO:0005634);; Cellular Component: cytoplasm (GO:0005737);; Biological Process: production of ta-siRNAs involved in RNA interference (GO:0010267);; Biological Process: rRNA catabolic process (GO:0016075);; Biological Process: production of miRNAs …	--	--	[A]	RNA processing and modification	--	Uncharacterized protein OS=Glycine max (Soybean) PE=3 SV=2	A	RNA processing and modification	PREDICTED: ribonuclease 3-like protein 2-like [Cucumis sativus]
Csa3G739560	--	--	Molecular Function: signal transducer activity (GO:0004871);; Cellular Component: plasma membrane (GO:0005886);; Biological Process: signal transduction (GO:0007165);; Biological Process: response to light stimulus (GO:0009416);; Cellular Component: membrane (GO:0016020);;	--	--	--	--	NPH3 family;; BTB/POZ domain	Uncharacterized protein GN=PRUPE_ppa018795mg OS=Prunus persica (Peach) PE=4 SV=1	R	General function prediction only	PREDICTED: BTB/POZ domain-containing protein At5g03250-like [Cucumis sativus]
Csa4G651760	--	--	Molecular Function: peroxidase activity (GO:0004601);; Cellular Component: extracellular region (GO:0005576);; Biological Process: mRNA processing (GO:0006397);; Biological Process: response to oxidative stress (GO:0006979);; Molecular Function: hydrolase activity, acting on ester bonds (GO:0016788);; Molecular Function: heme binding (GO:0020037);; Molecular Function: metal ion binding (GO:004687…	K00430|0|csv:101228848|peroxidase 46-like; K00430 peroxidase [EC:1.11.1.7] (A)	Phenylalanine metabolism (ko00360);; Phenylpropanoid biosynthesis (ko00940)	--	--	Peroxidase	Predicted protein GN=POPTRDRAFT_1106291 OS=Populus trichocarpa (Western balsam poplar) PE=3 SV=1	G	Carbohydrate transport and metabolism	PREDICTED: peroxidase 46-like [Cucumis sativus]
Csa3G225840	--	--	Cellular Component: plasma membrane (GO:0005886);; Biological Process: cellulose microfibril organization (GO:0010215);; Cellular Component: cytoplasmic membrane-bounded vesicle (GO:0016023);; Biological Process: cell growth (GO:0016049);; Cellular Component: anchored component of membrane (GO:0031225);; Cellular Component: cell periphery (GO:0071944);;	--	--	--	--	COBRA-like protein	Uncharacterized protein GN=PRUPE_ppa022902mg OS=Prunus persica (Peach) PE=4 SV=1	R	General function prediction only	PREDICTED: COBRA-like protein 1-like [Cucumis sativus]
Csa3G778270	[IQR]	Lipid transport and metabolism;; Secondary metabolites biosynthesis, transport and catabolism;; General function prediction only	Cellular Component: plastid (GO:0009536);; Molecular Function: oxidoreductase activity (GO:0016491);; Biological Process: diterpene phytoalexin precursor biosynthetic process pathway (GO:0051504);; Biological Process: oxidation-reduction process (GO:0055114);;	--	--	[R]	General function prediction only	Enoyl-(Acyl carrier protein) reductase;; short chain dehydrogenase;; KR domain	Predicted protein GN=POPTRDRAFT_561452 OS=Populus trichocarpa (Western balsam poplar) PE=4 SV=1	Q	Secondary metabolites biosynthesis, transport and catabolism	PREDICTED: momilactone A synthase-like [Cucumis sativus]
Csa4G124900	[J]	Translation, ribosomal structure and biogenesis	Molecular Function: structural constituent of ribosome (GO:0003735);; Cellular Component: nucleolus (GO:0005730);; Cellular Component: vacuole (GO:0005773);; Cellular Component: plasma membrane (GO:0005886);; Biological Process: translation (GO:0006412);; Cellular Component: chloroplast envelope (GO:0009941);; Biological Process: adaxial/abaxial pattern specification (GO:0009955);; Molecular Func…	K02940|1.04976e-139|csv:101209916|60S ribosomal protein L9-like; K02940 large subunit ribosomal protein L9e (A)	Ribosome (ko03010)	[J]	Translation, ribosomal structure and biogenesis	Ribosomal protein L6	Uncharacterized protein GN=PRUPE_ppa011825mg OS=Prunus persica (Peach) PE=4 SV=1	J	Translation, ribosomal structure and biogenesis	PREDICTED: 60S ribosomal protein L9-like [Cucumis sativus]
Csa2G294890	[R]	General function prediction only	--	--	--	[I]	Lipid transport and metabolism	Patatin-like phospholipase	Patatin-like protein (Fragment) OS=Cucumis sativus (Cucumber) PE=2 SV=1	I	Lipid transport and metabolism	PREDICTED: patatin group A-3-like, partial [Cucumis sativus]
Csa1G064850	[S]	Function unknown	Biological Process: cellular process (GO:0009987);; Molecular Function: kinase activity (GO:0016301);; Molecular Function: transferase activity, transferring phosphorus-containing groups (GO:0016772);; Biological Process: response to stimulus (GO:0050896);;	--	--	--	--	Salt stress response/antifungal	Cysteine-rich receptor-like protein kinase GN=MTR_116s0059 OS=Medicago truncatula (Barrel medic) PE=3 SV=1	T	Signal transduction mechanisms	PREDICTED: cysteine-rich receptor-like protein kinase 25-like [Cucumis sativus]
Csa2G036590	[R]	General function prediction only	Cellular Component: chloroplast (GO:0009507);; Biological Process: photosynthesis (GO:0015979);; Molecular Function: oxidoreductase activity (GO:0016491);; Molecular Function: flavin adenine dinucleotide binding (GO:0050660);; Biological Process: oxidation-reduction process (GO:0055114);;	--	--	--	--	FAD dependent oxidoreductase;; Pyridine nucleotide-disulphide oxidoreductase;; Pyridine nucleotide-disulphide oxidoreductase;; FAD binding domain;; HI0933-like protein;; FAD binding domain;; Glucose inhibited division protein A	Predicted protein GN=POPTRDRAFT_578714 OS=Populus trichocarpa (Western balsam poplar) PE=4 SV=1	R	General function prediction only	PREDICTED: uncharacterized protein Cbei_0202-like [Cucumis sativus]
Csa4G358650	--	--	Cellular Component: cytoplasmic membrane-bounded vesicle (GO:0016023);;	--	--	--	--	F-box-like;; F-box domain	Uncharacterized protein OS=Glycine max (Soybean) PE=4 SV=1	R	General function prediction only	PREDICTED: F-box protein SKIP31-like [Cucumis sativus]
Csa3G881660	[L]	Replication, recombination and repair	Molecular Function: DNA binding (GO:0003677);; Molecular Function: deoxyribodipyrimidine photo-lyase activity (GO:0003904);; Cellular Component: mitochondrion (GO:0005739);; Biological Process: DNA repair (GO:0006281);; Cellular Component: chloroplast (GO:0009507);; Biological Process: response to sucrose (GO:0009744);; Biological Process: flavonoid biosynthetic process (GO:0009813);; Molecular F…	K01669|0|cmo:103503771|cryptochrome DASH, chloroplastic/mitochondrial; K01669 deoxyribodipyrimidine photo-lyase [EC:4.1.99.3] (A)	--	[LT]	Replication, recombination and repair;; Signal transduction mechanisms	FAD binding domain of DNA photolyase;; DNA photolyase	Putative uncharacterized protein GN=VIT_04s0008g02670 OS=Vitis vinifera (Grape) PE=4 SV=1	L	Replication, recombination and repair	PREDICTED: cryptochrome DASH, chloroplastic/mitochondrial-like [Cucumis sativus]
Csa5G587150	--	--	Molecular Function: phosphoprotein phosphatase activity (GO:0004721);; Cellular Component: nucleus (GO:0005634);;	K17618|0|csv:101218435|ubiquitin-like domain-containing CTD phosphatase-like; K17618 ubiquitin-like domain-containing CTD phosphatase 1 [EC:3.1.3.16] (A)	--	[K]	Transcription	NLI interacting factor-like phosphatase;; Ubiquitin family	Putative uncharacterized protein GN=RCOM_0290900 OS=Ricinus communis (Castor bean) PE=4 SV=1	K	Transcription	PREDICTED: ubiquitin-like domain-containing CTD phosphatase-like [Cucumis sativus]
Csa2G327510	--	--	Cellular Component: nucleus (GO:0005634);; Cellular Component: cytosol (GO:0005829);; Biological Process: lipid transport (GO:0006869);;	--	--	[R]	General function prediction only	Galactose oxidase, central domain;; Galactose oxidase, central domain;; Kelch motif;; Kelch motif;; Kelch motif;; Kelch motif	Uncharacterized protein GN=PRUPE_ppa004462mg OS=Prunus persica (Peach) PE=4 SV=1	R	General function prediction only	PREDICTED: acyl-CoA-binding domain-containing protein 4-like [Cucumis sativus]
Csa3G099690	--	--	--	--	--	--	--	--	Uncharacterized protein OS=Glycine max (Soybean) PE=4 SV=1	S	Function unknown	PREDICTED: uncharacterized protein LOC101207037 [Cucumis sativus]
Csa3G496860	[S]	Function unknown	--	--	--	--	--	--	DNA double-strand break repair rad50 ATPase, putative GN=RCOM_1030810 OS=Ricinus communis (Castor bean) PE=4 SV=1	--	--	PREDICTED: LOW QUALITY PROTEIN: filament-like plant protein 3-like [Cucumis sativus]
Csa6G434400	[V]	Defense mechanisms	Molecular Function: ATP binding (GO:0005524);; Cellular Component: nucleus (GO:0005634);; Cellular Component: plasma membrane (GO:0005886);; Biological Process: ATP catabolic process (GO:0006200);; Biological Process: fatty acid catabolic process (GO:0009062);; Cellular Component: plasmodesma (GO:0009506);; Biological Process: response to salt stress (GO:0009651);; Biological Process: response to…	--	--	[Q]	Secondary metabolites biosynthesis, transport and catabolism	ABC-2 type transporter;; ABC transporter;; AAA domain	White-brown-complex ABC transporter family protein OS=Cucumis melo subsp. melo PE=3 SV=1	Q	Secondary metabolites biosynthesis, transport and catabolism	white-brown-complex ABC transporter family protein [Cucumis melo subsp. melo]
Csa2G310390	[J]	Translation, ribosomal structure and biogenesis	Molecular Function: translation initiation factor activity (GO:0003743);; Cellular Component: nucleus (GO:0005634);; Cellular Component: cytoplasm (GO:0005737);; Biological Process: translational initiation (GO:0006413);; Biological Process: RNA metabolic process (GO:0016070);;	K03262|0|csv:101210873|eukaryotic translation initiation factor 5-like; K03262 translation initiation factor 5 (A)	RNA transport (ko03013)	[J]	Translation, ribosomal structure and biogenesis	Domain found in IF2B/IF5;; eIF4-gamma/eIF5/eIF2-epsilon	Eukaryotic translation initiation factor, putative GN=RCOM_1033150 OS=Ricinus communis (Castor bean) PE=4 SV=1	J	Translation, ribosomal structure and biogenesis	PREDICTED: eukaryotic translation initiation factor 5-like [Cucumis sativus]
Csa3G002530	[C]	Energy production and conversion	Molecular Function: binding (GO:0005488);; Biological Process: carbohydrate metabolic process (GO:0005975);; Cellular Component: plastid (GO:0009536);; Molecular Function: lyase activity (GO:0016829);; Cellular Component: intracellular membrane-bounded organelle (GO:0043231);; Biological Process: cellular metabolic process (GO:0044237);; Cellular Component: cytoplasmic part (GO:0044444);; Biologi…	K01681|2.50465e-58|mus:103999530|putative aconitate hydratase, cytoplasmic; K01681 aconitate hydratase [EC:4.2.1.3] (A)	Citrate cycle (TCA cycle) (ko00020);; Glyoxylate and dicarboxylate metabolism (ko00630);; Carbon metabolism (ko01200);; 2-Oxocarboxylic acid metabolism (ko01210);; Biosynthesis of amino acids (ko01230)	[AJ]	RNA processing and modification;; Translation, ribosomal structure and biogenesis	Aconitase C-terminal domain	Aconitate hydratase (Fragment) GN=aco OS=Pinus pinaster (Maritime pine) PE=4 SV=1	C	Energy production and conversion	aconitate hydratase [Pinus pinaster]
Csa1G600160	[PR]	Inorganic ion transport and metabolism;; General function prediction only	Cellular Component: chloroplast envelope (GO:0009941);; Molecular Function: chlorophyllide a oxygenase [overall] activity (GO:0010277);; Molecular Function: metal ion binding (GO:0046872);; Molecular Function: 2 iron, 2 sulfur cluster binding (GO:0051537);; Biological Process: oxidation-reduction process (GO:0055114);;	--	--	--	--	Rieske [2Fe-2S] domain	Uncharacterized protein GN=PRUPE_ppa004005mg OS=Prunus persica (Peach) PE=4 SV=1	R	General function prediction only	PREDICTED: protochlorophyllide-dependent translocon component 52, chloroplastic-like [Cucumis sativus]
Csa7G450630	--	--	Molecular Function: ATP binding (GO:0005524);; Cellular Component: mitochondrial inner membrane (GO:0005743);; Biological Process: ATP catabolic process (GO:0006200);; Biological Process: mitochondrial transport (GO:0006839);; Cellular Component: integral component of membrane (GO:0016021);; Molecular Function: ATPase activity (GO:0016887);; Biological Process: transmembrane transport (GO:0055085…	K15121|0|csv:101210602|solute carrier family 25 member 44-like; K15121 solute carrier family 25, member 44 (A)	--	[C]	Energy production and conversion	Mitochondrial carrier protein	Uncharacterized protein GN=PRUPE_ppa008018mg OS=Prunus persica (Peach) PE=4 SV=1	R	General function prediction only	PREDICTED: solute carrier family 25 member 44-like [Cucumis sativus]
Csa6G141370	--	--	Biological Process: cell morphogenesis (GO:0000902);; Cellular Component: plasma membrane (GO:0005886);; Biological Process: phosphatidylinositol biosynthetic process (GO:0006661);; Cellular Component: integral component of membrane (GO:0016021);; Biological Process: cell growth (GO:0016049);; Biological Process: single-organism cellular process (GO:0044763);; Biological Process: Golgi vesicle tr…	--	--	--	--	Domain of unknown function (DUF588)	Uncharacterized protein OS=Glycine max (Soybean) PE=2 SV=1	S	Function unknown	PREDICTED: CASP-like protein At2g28370-like [Cucumis sativus]
Csa5G002050	[LR]	Replication, recombination and repair;; General function prediction only	Molecular Function: bis(5'-nucleosyl)-tetraphosphatase (asymmetrical) activity (GO:0004081);; Biological Process: oligopeptide transport (GO:0006857);; Molecular Function: guanosine-3',5'-bis(diphosphate) 3'-diphosphatase activity (GO:0008893);; Cellular Component: chloroplast (GO:0009507);; Biological Process: diadenosine tetraphosphate catabolic process (GO:0015967);; Biological Process: methyl…	--	--	--	--	NUDIX domain	Predicted protein GN=POPTRDRAFT_566492 OS=Populus trichocarpa (Western balsam poplar) PE=3 SV=1	L	Replication, recombination and repair	PREDICTED: nudix hydrolase 25-like [Cucumis sativus]
Csa5G125710	--	--	Cellular Component: nucleus (GO:0005634);;	--	--	[S]	Function unknown	N-terminal domain of NEFA-interacting nuclear protein NIP30	NEFA-interacting nuclear protein NIP30, putative GN=RCOM_1343450 OS=Ricinus communis (Castor bean) PE=4 SV=1	S	Function unknown	PREDICTED: uncharacterized protein LOC101214185 [Cucumis sativus]
Csa6G121440	--	--	--	--	--	--	--	--	NAC domain protein GN=MTR_4g101680 OS=Medicago truncatula (Barrel medic) PE=4 SV=1	--	--	PREDICTED: DUF246 domain-containing protein At1g04910-like [Cucumis sativus]
Csa3G171070	--	--	Cellular Component: plasma membrane (GO:0005886);; Molecular Function: methyltransferase activity (GO:0008168);; Biological Process: methylation (GO:0032259);;	--	--	[E]	Amino acid transport and metabolism	Methyltransferase domain;; Methyltransferase domain;; Methyltransferase domain;; Thiopurine S-methyltransferase (TPMT)	S-adenosylmethionine-dependent methyltransferase, putative GN=RCOM_1002920 OS=Ricinus communis (Castor bean) PE=4 SV=1	E	Amino acid transport and metabolism	PREDICTED: methyltransferase-like protein 13-like [Cucumis sativus]
Csa5G514490	--	--	--	--	--	--	--	--	Putative uncharacterized protein GN=VIT_13s0019g01450 OS=Vitis vinifera (Grape) PE=4 SV=1	S	Function unknown	PREDICTED: uncharacterized protein LOC101212316 [Cucumis sativus]
Csa4G038780	--	--	--	--	--	--	--	Protein of unknown function (DUF2781)	Uncharacterized protein GN=PRUPE_ppa012485mg OS=Prunus persica (Peach) PE=4 SV=1	S	Function unknown	PREDICTED: uncharacterized protein LOC101215233 [Cucumis sativus]
Csa7G032240	--	--	--	--	--	--	--	--	Putative uncharacterized protein GN=VIT_12s0057g00950 OS=Vitis vinifera (Grape) PE=4 SV=1	S	Function unknown	PREDICTED: uncharacterized protein LOC100854493 [Vitis vinifera]
Cucumber_newGene_1056	--	--	Biological Process: flower development (GO:0009908);; Molecular Function: histone-lysine N-methyltransferase activity (GO:0018024);; Biological Process: methylation (GO:0032259);; Cellular Component: intracellular part (GO:0044424);; Biological Process: single-organism cellular process (GO:0044763);; Molecular Function: metal ion binding (GO:0046872);; Biological Process: regulation of biological…	--	--	[BK]	Chromatin structure and dynamics;; Transcription	--	Histone-lysine N-methyltransferase ATX1 GN=T9H9.17 OS=Arabidopsis thaliana (Mouse-ear cress) PE=1 SV=2	BK	Chromatin structure and dynamics;; Transcription	PREDICTED: histone-lysine N-methyltransferase ATX2 isoform X2 [Populus euphratica]
Csa1G433100	--	--	Molecular Function: metal ion binding (GO:0046872);;	--	--	[O]	Posttranslational modification, protein turnover, chaperones	Ring finger domain;; RING-H2 zinc finger;; Zinc finger, C3HC4 type (RING finger);; Zinc finger, C3HC4 type (RING finger);; Anaphase-promoting complex subunit 11 RING-H2 finger	Putative uncharacterized protein GN=VIT_11s0052g00530 OS=Vitis vinifera (Grape) PE=4 SV=1	O	Posttranslational modification, protein turnover, chaperones	PREDICTED: RING-H2 finger protein ATL43-like [Cucumis sativus]
CsaUNG008870	--	--	Cellular Component: intracellular membrane-bounded organelle (GO:0043231);; Cellular Component: cytoplasmic part (GO:0044444);;	K07541|0|csv:101206805|phosphatidylinositol-glycan biosynthesis class X protein-like; K07541 phosphatidylinositol glycan, class X (A)	Glycosylphosphatidylinositol(GPI)-anchor biosynthesis (ko00563)	--	--	PIG-X / PBN1	Uncharacterized protein GN=PRUPE_ppa008727mg OS=Prunus persica (Peach) PE=4 SV=1	R	General function prediction only	PREDICTED: phosphatidylinositol-glycan biosynthesis class X protein-like [Cucumis sativus]
Csa7G452200	[RTKL]	General function prediction only;; Signal transduction mechanisms;; Transcription;; Replication, recombination and repair	Molecular Function: nucleotide binding (GO:0000166);; Biological Process: respiratory burst involved in defense response (GO:0002679);; Molecular Function: protein kinase activity (GO:0004672);; Cellular Component: plasma membrane (GO:0005886);; Biological Process: tryptophan catabolic process (GO:0006569);; Biological Process: oligopeptide transport (GO:0006857);; Biological Process: indoleaceti…	--	--	--	--	Carbohydrate-binding protein of the ER;; Protein tyrosine kinase;; Protein kinase domain;; Leucine Rich repeats (2 copies);; Leucine rich repeat;; Leucine Rich Repeat	Uncharacterized protein GN=PRUPE_ppa017450mg OS=Prunus persica (Peach) PE=4 SV=1	T	Signal transduction mechanisms	PREDICTED: uncharacterized protein LOC101206211 [Cucumis sativus]
Csa2G009410	--	--	Molecular Function: methyltransferase activity (GO:0008168);; Cellular Component: plastoglobule (GO:0010287);; Biological Process: methylation (GO:0032259);; Biological Process: response to karrikin (GO:0080167);;	--	--	--	--	Methyltransferase domain;; Methyltransferase domain;; Methyltransferase domain;; Methyltransferase domain;; Methyltransferase domain;; ubiE/COQ5 methyltransferase family;; Methyltransferase domain	Uncharacterized protein OS=Glycine max (Soybean) PE=4 SV=1	R	General function prediction only	PREDICTED: uncharacterized methyltransferase At2g41040, chloroplastic-like [Cucumis sativus]
Csa1G038900	--	--	Biological Process: actin cytoskeleton organization (GO:0030036);;	--	--	--	--	Formin Homology 2 Domain;; C2 domain of PTEN tumour-suppressor protein	Uncharacterized protein OS=Glycine max (Soybean) PE=4 SV=1	R	General function prediction only	PREDICTED: formin-like protein 20-like [Cucumis sativus]
Csa5G516570	--	--	--	--	--	--	--	C1 domain;; C1-like domain	Putative uncharacterized protein GN=VITISV_016055 OS=Vitis vinifera (Grape) PE=4 SV=1	S	Function unknown	PREDICTED: uncharacterized protein LOC101227411 [Cucumis sativus]
Csa6G003430	[H]	Coenzyme transport and metabolism	Molecular Function: zinc ion binding (GO:0008270);; Molecular Function: diaminohydroxyphosphoribosylaminopyrimidine deaminase activity (GO:0008835);; Biological Process: riboflavin biosynthetic process (GO:0009231);; Cellular Component: chloroplast stroma (GO:0009570);; Biological Process: oxidation-reduction process (GO:0055114);;	K11752|0|csv:101202904|riboflavin biosynthesis protein RibD-like; K11752 diaminohydroxyphosphoribosylaminopyrimidine deaminase / 5-amino-6-(5-phosphoribosylamino)uracil reductase [EC:3.5.4.26 1.1.1.193] (A)	Riboflavin metabolism (ko00740)	[F]	Nucleotide transport and metabolism	Cytidine and deoxycytidylate deaminase zinc-binding region	Putative uncharacterized protein GN=VIT_15s0046g02860 OS=Vitis vinifera (Grape) PE=4 SV=1	H	Coenzyme transport and metabolism	PREDICTED: riboflavin biosynthesis protein RibD-like [Cucumis sativus]
Csa2G093840	--	--	Molecular Function: hydrolase activity (GO:0016787);;	--	--	--	--	GDSL-like Lipase/Acylhydrolase	Uncharacterized protein GN=PRUPE_ppa007546mg OS=Prunus persica (Peach) PE=4 SV=1	R	General function prediction only	PREDICTED: GDSL esterase/lipase At1g29660-like [Cucumis sativus]
Csa6G425740	--	--	Biological Process: response to stress (GO:0006950);; Biological Process: signal transduction (GO:0007165);; Biological Process: response to abiotic stimulus (GO:0009628);; Biological Process: response to hormone (GO:0009725);; Biological Process: response to oxygen-containing compound (GO:1901700);;	--	--	--	--	--	Putative uncharacterized protein GN=VIT_06s0080g00910 OS=Vitis vinifera (Grape) PE=4 SV=1	R	General function prediction only	PREDICTED: probable F-box protein At1g60180-like, partial [Cucumis sativus]
Csa1G574230	[J]	Translation, ribosomal structure and biogenesis	Cellular Component: cytoplasm (GO:0005737);; Molecular Function: N-acetyltransferase activity (GO:0008080);; Biological Process: metabolic process (GO:0008152);; Cellular Component: membrane (GO:0016020);;	--	--	--	--	Acetyltransferase (GNAT) domain;; Acetyltransferase (GNAT) domain;; Acetyltransferase (GNAT) family;; Acetyltransferase (GNAT) domain	N-acetyltransferase, putative GN=MTR_7g114410 OS=Medicago truncatula (Barrel medic) PE=4 SV=1	R	General function prediction only	PREDICTED: uncharacterized N-acetyltransferase YoaA-like [Cucumis sativus]
Csa6G525500	[I]	Lipid transport and metabolism	Molecular Function: catalytic activity (GO:0003824);; Cellular Component: cytoplasm (GO:0005737);; Cellular Component: plasma membrane (GO:0005886);; Biological Process: chromatin silencing (GO:0006342);; Biological Process: histone H3-K9 methylation (GO:0051567);;	--	--	[I]	Lipid transport and metabolism	Alpha/beta hydrolase family;; Alpha/beta hydrolase family;; Putative lysophospholipase;; Acetyl xylan esterase (AXE1)	Putative uncharacterized protein GN=VIT_10s0003g04950 OS=Vitis vinifera (Grape) PE=4 SV=1	I	Lipid transport and metabolism	PREDICTED: monoglyceride lipase-like [Cucumis sativus]
Cucumber_newGene_341	--	--	Biological Process: response to other organism (GO:0051707);;	--	--	--	--	Thaumatin family	Thaumatin-like protein (Precursor) OS=Oryza sativa subsp. japonica (Rice) PE=2 SV=1	R	General function prediction only	PREDICTED: thaumatin-like protein-like [Cucumis sativus]
Csa6G327970	[T]	Signal transduction mechanisms	Molecular Function: protein serine/threonine phosphatase activity (GO:0004722);; Biological Process: protein dephosphorylation (GO:0006470);; Cellular Component: protein serine/threonine phosphatase complex (GO:0008287);; Molecular Function: metal ion binding (GO:0046872);;	K01102|0|csv:101207284|probable protein phosphatase 2C 42-like; K01102 pyruvate dehydrogenase phosphatase [EC:3.1.3.43] (A)	--	[T]	Signal transduction mechanisms	Protein phosphatase 2C	Putative uncharacterized protein GN=VIT_05s0077g00830 OS=Vitis vinifera (Grape) PE=3 SV=1	T	Signal transduction mechanisms	PREDICTED: probable protein phosphatase 2C 42-like [Cucumis sativus]
Csa6G398220	--	--	--	--	--	--	--	--	--	--	--	PREDICTED: probable receptor-like protein kinase At2g23200-like [Cucumis sativus]
Csa3G165680	--	--	--	K09422|1.30863e-98|csv:101224785|transcription factor MYB12-like; K09422 myb proto-oncogene protein, plant (A)	--	--	--	--	--	--	--	PREDICTED: transcription factor MYB12-like [Cucumis sativus]
Cucumber_newGene_365	--	--	Molecular Function: serine-type endopeptidase inhibitor activity (GO:0004867);; Biological Process: response to wounding (GO:0009611);; Biological Process: negative regulation of peptidase activity (GO:0010466);; Molecular Function: metal ion binding (GO:0046872);;	--	--	--	--	Potato inhibitor I family	Inhibitor of trypsin and hageman factor OS=Cucurbita maxima (Pumpkin) PE=1 SV=1	R	General function prediction only	PREDICTED: inhibitor of trypsin and hageman factor-like [Cucumis sativus]
Csa5G139890	--	--	--	--	--	--	--	F-box-like;; F-box domain	Putative uncharacterized protein GN=VITISV_034908 OS=Vitis vinifera (Grape) PE=2 SV=1	R	General function prediction only	PREDICTED: F-box protein At5g52880-like [Cucumis sativus]
Csa3G640640	--	--	Molecular Function: UDP-glucosyltransferase activity (GO:0035251);; Biological Process: cellular metabolic process (GO:0044237);; Biological Process: primary metabolic process (GO:0044238);; Biological Process: organic substance metabolic process (GO:0071704);;	--	--	[GC]	Carbohydrate transport and metabolism;; Energy production and conversion	UDP-glucoronosyl and UDP-glucosyl transferase	Uncharacterized protein GN=PRUPE_ppa024271mg OS=Prunus persica (Peach) PE=4 SV=1	CG	Energy production and conversion;; Carbohydrate transport and metabolism	PREDICTED: UDP-glycosyltransferase 89B1-like [Cucumis sativus]
Csa3G814400	[S]	Function unknown	--	--	--	[T]	Signal transduction mechanisms	NB-ARC domain;; Leucine rich repeat;; Leucine Rich repeats (2 copies);; Leucine Rich Repeat	Leucine-rich repeat containing protein, putative GN=RCOM_0751360 OS=Ricinus communis (Castor bean) PE=4 SV=1	T	Signal transduction mechanisms	PREDICTED: putative disease resistance protein RGA4-like [Cucumis sativus]
Csa1G001330	--	--	Molecular Function: ATP binding (GO:0005524);;	--	--	[D]	Cell cycle control, cell division, chromosome partitioning	--	Zinc finger protein, putative GN=RCOM_1504950 OS=Ricinus communis (Castor bean) PE=4 SV=1	D	Cell cycle control, cell division, chromosome partitioning	PREDICTED: uncharacterized protein LOC101222073 [Cucumis sativus]
Csa7G430200	--	--	Molecular Function: monooxygenase activity (GO:0004497);; Molecular Function: iron ion binding (GO:0005506);; Cellular Component: extracellular region (GO:0005576);; Biological Process: lipid transport (GO:0006869);; Molecular Function: lipid binding (GO:0008289);; Molecular Function: electron carrier activity (GO:0009055);; Molecular Function: oxidoreductase activity, acting on paired donors, wi…	--	--	--	--	Probable lipid transfer;; Protease inhibitor/seed storage/LTP family	Uncharacterized protein GN=PRUPE_ppa013464mg OS=Prunus persica (Peach) PE=4 SV=1	R	General function prediction only	PREDICTED: non-specific lipid-transfer protein 8-like [Cucumis sativus]
Csa6G045070	--	--	Cellular Component: nucleus (GO:0005634);;	--	--	[K]	Transcription	Enhancer of polycomb-like	Uncharacterized protein GN=PRUPE_ppa001422mg OS=Prunus persica (Peach) PE=4 SV=1	K	Transcription	PREDICTED: uncharacterized protein LOC101207239 [Cucumis sativus]
Csa5G155590	[GER]	Carbohydrate transport and metabolism;; Amino acid transport and metabolism;; General function prediction only	Cellular Component: integral component of membrane (GO:0016021);; Biological Process: transmembrane transport (GO:0055085);;	K15277|0|csv:101204857|UDP-galactose/UDP-glucose transporter 2-like; K15277 solute carrier family 35 (adenosine 3'-phospho 5'-phosphosulfate transporter), member B3 (A)	--	[G]	Carbohydrate transport and metabolism	UAA transporter family;; Triose-phosphate Transporter family	Solute carrier family 35 member B3, related OS=Medicago truncatula (Barrel medic) PE=4 SV=1	G	Carbohydrate transport and metabolism	PREDICTED: UDP-galactose/UDP-glucose transporter 2-like [Cucumis sativus]
Csa2G384970	--	--	--	--	--	--	--	--	Plastid envelope DNA binding protein (Fragment) GN=PEND OS=Cucumis sativus (Cucumber) PE=4 SV=1	R	General function prediction only	PREDICTED: uncharacterized protein LOC101202832 [Cucumis sativus]
Csa2G005970	[O]	Posttranslational modification, protein turnover, chaperones	Molecular Function: ATP binding (GO:0005524);; Cellular Component: nucleus (GO:0005634);; Cellular Component: cytosol (GO:0005829);; Cellular Component: plasma membrane (GO:0005886);; Biological Process: ATP catabolic process (GO:0006200);; Biological Process: ubiquitin-dependent protein catabolic process (GO:0006511);; Molecular Function: peptidase activity (GO:0008233);; Cellular Component: pro…	K03066|0|csv:101204697|26S protease regulatory subunit 8 homolog A-like; K03066 26S proteasome regulatory subunit T6 (A)	Proteasome (ko03050)	[O]	Posttranslational modification, protein turnover, chaperones	ATPase family associated with various cellular activities (AAA);; AAA domain (Cdc48 subfamily);; AAA domain (dynein-related subfamily);; Holliday junction DNA helicase ruvB N-terminus	Uncharacterized protein GN=PRUPE_ppa006323mg OS=Prunus persica (Peach) PE=4 SV=1	O	Posttranslational modification, protein turnover, chaperones	PREDICTED: 26S protease regulatory subunit 8 homolog A-like [Cucumis sativus]
Csa6G139760	[RTKL]	General function prediction only;; Signal transduction mechanisms;; Transcription;; Replication, recombination and repair	Biological Process: activation of MAPKK activity (GO:0000186);; Molecular Function: MAP kinase kinase kinase activity (GO:0004709);; Molecular Function: ATP binding (GO:0005524);; Cellular Component: plasma membrane (GO:0005886);; Cellular Component: plasmodesma (GO:0009506);; Biological Process: protein autophosphorylation (GO:0046777);;	--	--	[T]	Signal transduction mechanisms	Protein kinase domain;; Protein tyrosine kinase	ATP binding protein, putative GN=RCOM_0696690 OS=Ricinus communis (Castor bean) PE=3 SV=1	T	Signal transduction mechanisms	PREDICTED: probable receptor-like protein kinase At2g42960-like [Cucumis sativus]
Csa2G270870	--	--	Molecular Function: nucleic acid binding (GO:0003676);; Molecular Function: ubiquitin-protein transferase activity (GO:0004842);; Cellular Component: nucleus (GO:0005634);; Cellular Component: cytosol (GO:0005829);; Biological Process: postreplication repair (GO:0006301);; Biological Process: protein ubiquitination (GO:0016567);; Biological Process: protein deubiquitination (GO:0016579);;	K10581|0|csv:101220698|probable ubiquitin-conjugating enzyme E2 23-like; K10581 ubiquitin-conjugating enzyme E2 O [EC:6.3.2.19] (A)	Ubiquitin mediated proteolysis (ko04120)	[O]	Posttranslational modification, protein turnover, chaperones	Ubiquitin-conjugating enzyme	Putative uncharacterized protein GN=VIT_03s0038g02570 OS=Vitis vinifera (Grape) PE=4 SV=1	O	Posttranslational modification, protein turnover, chaperones	PREDICTED: probable ubiquitin-conjugating enzyme E2 23-like [Cucumis sativus]
Csa6G350370	--	--	Molecular Function: binding (GO:0005488);; Biological Process: metabolic process (GO:0008152);; Molecular Function: kinase activity (GO:0016301);; Molecular Function: transferase activity, transferring phosphorus-containing groups (GO:0016772);; Biological Process: single-organism cellular process (GO:0044763);; Biological Process: response to stimulus (GO:0050896);; Biological Process: biologica…	--	--	--	--	Wall-associated receptor kinase galacturonan-binding;; Calcium-binding EGF domain	Putative uncharacterized protein GN=VIT_18s0001g01370 OS=Vitis vinifera (Grape) PE=4 SV=1	T	Signal transduction mechanisms	PREDICTED: LOW QUALITY PROTEIN: wall-associated receptor kinase 2-like [Cucumis sativus]
Csa3G183980	--	--	--	--	--	--	--	--	Uncharacterized protein GN=PRUPE_ppa007156mg OS=Prunus persica (Peach) PE=4 SV=1	S	Function unknown	PREDICTED: uncharacterized protein LOC101210672 [Cucumis sativus]
Csa6G148330	--	--	Biological Process: mitotic cell cycle (GO:0000278);; Molecular Function: cyclin-dependent protein serine/threonine kinase activity (GO:0004693);; Molecular Function: protein binding (GO:0005515);; Cellular Component: nucleus (GO:0005634);; Cellular Component: cytoplasm (GO:0005737);; Biological Process: phosphatidylinositol biosynthetic process (GO:0006661);; Biological Process: stomatal lineage…	K02219|4.29707e-31|cmo:103503041|cyclin-dependent kinases regulatory subunit 1-like; K02219 cyclin-dependent kinase regulatory subunit CKS1 (A)	--	[D]	Cell cycle control, cell division, chromosome partitioning	Cyclin-dependent kinase regulatory subunit	Cyclin-dependent kinases regulatory subunit, putative GN=RCOM_0475440 OS=Ricinus communis (Castor bean) PE=4 SV=1	D	Cell cycle control, cell division, chromosome partitioning	Cyclin-dependent kinases regulatory subunit, putative [Ricinus communis]
Csa6G052740	--	--	--	--	--	--	--	Protein of unknown function (DUF1475)	Uncharacterized protein GN=PRUPE_ppa010504mg OS=Prunus persica (Peach) PE=4 SV=1	S	Function unknown	PREDICTED: uncharacterized protein LOC101218847 [Cucumis sativus]
Csa3G000070	--	--	Cellular Component: nucleus (GO:0005634);; Cellular Component: plasma membrane (GO:0005886);; Biological Process: phosphatidylglycerol biosynthetic process (GO:0006655);; Molecular Function: transferase activity, transferring acyl groups (GO:0016746);;	K13511|0|csv:101224878|tafazzin homolog; K13511 monolysocardiolipin acyltransferase [EC:2.3.1.-] (A)	Glycerophospholipid metabolism (ko00564)	[I]	Lipid transport and metabolism	Acyltransferase	Taz protein, putative GN=RCOM_0613760 OS=Ricinus communis (Castor bean) PE=4 SV=1	I	Lipid transport and metabolism	PREDICTED: tafazzin homolog [Cucumis sativus]
Csa7G407660	--	--	Molecular Function: sequence-specific DNA binding transcription factor activity (GO:0003700);; Biological Process: protein targeting to vacuole (GO:0006623);; Biological Process: cellular response to starvation (GO:0009267);; Biological Process: vesicle-mediated transport (GO:0016192);; Molecular Function: sequence-specific DNA binding (GO:0043565);; Biological Process: positive regulation of tra…	--	--	--	--	bZIP transcription factor;; Basic region leucine zipper	BZIP type transcription factor GN=VubZIP53 OS=Vigna unguiculata (Cowpea) PE=2 SV=1	K	Transcription	PREDICTED: ocs element-binding factor 1-like [Cucumis sativus]
Csa3G685690	[RTKL]	General function prediction only;; Signal transduction mechanisms;; Transcription;; Replication, recombination and repair	Molecular Function: protein serine/threonine kinase activity (GO:0004674);; Molecular Function: ATP binding (GO:0005524);; Cellular Component: extracellular region (GO:0005576);; Biological Process: protein phosphorylation (GO:0006468);; Biological Process: defense response (GO:0006952);; Molecular Function: ADP binding (GO:0043531);;	--	--	[T]	Signal transduction mechanisms	Protein tyrosine kinase;; Protein kinase domain	Uncharacterized protein GN=PRUPE_ppa004965mg OS=Prunus persica (Peach) PE=4 SV=1	T	Signal transduction mechanisms	PREDICTED: serine/threonine-protein kinase-like protein At3g51990-like [Cucumis sativus]
Csa6G448740	[E]	Amino acid transport and metabolism	Cellular Component: plastid (GO:0009536);; Molecular Function: lyase activity (GO:0016829);; Biological Process: organic substance biosynthetic process (GO:1901576);; Biological Process: alpha-amino acid metabolic process (GO:1901605);;	K01754|0|csv:101205680|threonine dehydratase biosynthetic, chloroplastic-like; K01754 threonine dehydratase [EC:4.3.1.19] (A)	Glycine, serine and threonine metabolism (ko00260);; Valine, leucine and isoleucine biosynthesis (ko00290);; Carbon metabolism (ko01200);; Biosynthesis of amino acids (ko01230)	[E]	Amino acid transport and metabolism	Pyridoxal-phosphate dependent enzyme;; C-terminal regulatory domain of Threonine dehydratase	Uncharacterized protein OS=Glycine max (Soybean) PE=4 SV=1	E	Amino acid transport and metabolism	PREDICTED: threonine dehydratase biosynthetic, chloroplastic-like [Cucumis sativus]
Csa1G015850	[J]	Translation, ribosomal structure and biogenesis	Molecular Function: translation initiation factor activity (GO:0003743);; Molecular Function: guanyl-nucleotide exchange factor activity (GO:0005085);; Molecular Function: GTP binding (GO:0005525);; Cellular Component: nucleus (GO:0005634);; Cellular Component: eukaryotic translation initiation factor 2B complex (GO:0005851);; Biological Process: negative regulation of translational initiation (G…	K03680|0|csv:101215104|translation initiation factor eIF-2B subunit delta-like; K03680 translation initiation factor eIF-2B subunit delta (A)	RNA transport (ko03013)	[J]	Translation, ribosomal structure and biogenesis	Initiation factor 2 subunit family	Uncharacterized protein GN=PRUPE_ppa002668mg OS=Prunus persica (Peach) PE=4 SV=1	J	Translation, ribosomal structure and biogenesis	PREDICTED: translation initiation factor eIF-2B subunit delta-like [Cucumis sativus]
Csa1G467720	--	--	Cellular Component: ubiquitin ligase complex (GO:0000151);; Molecular Function: ubiquitin-protein transferase activity (GO:0004842);; Biological Process: plant-type hypersensitive response (GO:0009626);; Biological Process: defense response to fungus, incompatible interaction (GO:0009817);; Biological Process: protein ubiquitination (GO:0016567);;	--	--	[S]	Function unknown	Armadillo/beta-catenin-like repeat;; U-box domain;; Armadillo-like;; Zinc-finger of the MIZ type in Nse subunit	Ubiquitin-protein ligase, putative GN=RCOM_1251990 OS=Ricinus communis (Castor bean) PE=4 SV=1	S	Function unknown	PREDICTED: U-box domain-containing protein 17-like [Cucumis sativus]
Csa2G222060	--	--	Molecular Function: protein binding (GO:0005515);; Cellular Component: chloroplast thylakoid membrane (GO:0009535);; Cellular Component: chloroplast thylakoid lumen (GO:0009543);; Cellular Component: chloroplast stroma (GO:0009570);; Biological Process: regulation of cell proliferation (GO:0042127);; Biological Process: leaf development (GO:0048366);; Biological Process: photosystem I assembly (G…	--	--	--	--	tify domain;; Divergent CCT motif	Uncharacterized protein GN=PRUPE_ppa008393mg OS=Prunus persica (Peach) PE=4 SV=1	S	Function unknown	PREDICTED: protein TIFY 4B-like [Cucumis sativus]
Csa3G860300	--	--	Cellular Component: nucleus (GO:0005634);; Cellular Component: cytosol (GO:0005829);; Biological Process: protein targeting to vacuole (GO:0006623);; Biological Process: vesicle-mediated transport (GO:0016192);; Cellular Component: clathrin vesicle coat (GO:0030125);; Cellular Component: clathrin adaptor complex (GO:0030131);;	K12402|0|cmo:103503915|AP-4 complex subunit mu; K12402 AP-4 complex subunit mu-1 (A)	--	[U]	Intracellular trafficking, secretion, and vesicular transport	Adaptor complexes medium subunit family;; Clathrin adaptor complex small chain	Uncharacterized protein GN=Solyc04g076230.2 OS=Solanum lycopersicum (Tomato) PE=4 SV=1	U	Intracellular trafficking, secretion, and vesicular transport	PREDICTED: AP-4 complex subunit mu-1-like [Cucumis sativus]
Csa7G135930	--	--	--	K01412|8.06309e-45|csv:101213218|mitochondrial-processing peptidase subunit alpha-like; K01412 mitochondrial-processing peptidase subunit alpha [EC:3.4.24.64] (A)	--	--	--	--	--	--	--	PREDICTED: mitochondrial-processing peptidase subunit alpha-like [Cucumis sativus]
Csa6G375730	--	--	--	--	--	[T]	Signal transduction mechanisms	NB-ARC domain;; Leucine rich repeat	Putative uncharacterized protein GN=VITISV_003942 OS=Vitis vinifera (Grape) PE=4 SV=1	T	Signal transduction mechanisms	PREDICTED: disease resistance protein RGA2-like [Cucumis sativus]
Csa7G398740	--	--	--	--	--	--	--	--	Putative uncharacterized protein (Fragment) GN=PHYSODRAFT_478485 OS=Phytophthora sojae (strain P6497) PE=4 SV=1	--	--	hypothetical protein PHYSODRAFT_478485 [Phytophthora sojae]
Csa3G150790	--	--	Cellular Component: endoplasmic reticulum (GO:0005783);; Cellular Component: plant-type vacuole membrane (GO:0009705);;	--	--	--	--	Protein of unknown function (DUF679)	Uncharacterized protein OS=Medicago truncatula (Barrel medic) PE=2 SV=1	S	Function unknown	PREDICTED: uncharacterized protein LOC101205404 [Cucumis sativus]
Csa4G013540	[J]	Translation, ribosomal structure and biogenesis	Molecular Function: aminoacyl-tRNA editing activity (GO:0002161);; Molecular Function: isoleucine-tRNA ligase activity (GO:0004822);; Molecular Function: ATP binding (GO:0005524);; Cellular Component: cytosol (GO:0005829);; Biological Process: gluconeogenesis (GO:0006094);; Biological Process: glycolytic process (GO:0006096);; Biological Process: isoleucyl-tRNA aminoacylation (GO:0006428);; Biolo…	K01870|0|csv:101212830|IARS; isoleucyl-tRNA synthetase; K01870 isoleucyl-tRNA synthetase [EC:6.1.1.5] (A)	Aminoacyl-tRNA biosynthesis (ko00970)	[J]	Translation, ribosomal structure and biogenesis	tRNA synthetases class I (I, L, M and V);; Anticodon-binding domain of tRNA;; tRNA synthetases class I (M)	Uncharacterized protein GN=PRUPE_ppa000442mg OS=Prunus persica (Peach) PE=4 SV=1	J	Translation, ribosomal structure and biogenesis	PREDICTED: isoleucine--tRNA ligase, cytoplasmic-like [Cucumis sativus]
Csa2G033280	--	--	Molecular Function: kinase activity (GO:0016301);; Biological Process: phosphorylation (GO:0016310);; Molecular Function: polysaccharide binding (GO:0030247);;	--	--	[T]	Signal transduction mechanisms	Wall-associated receptor kinase galacturonan-binding	Predicted protein GN=POPTRDRAFT_581925 OS=Populus trichocarpa (Western balsam poplar) PE=4 SV=1	T	Signal transduction mechanisms	predicted protein [Populus trichocarpa]
Csa2G005280	[U]	Intracellular trafficking, secretion, and vesicular transport	Biological Process: cellular process (GO:0009987);; Molecular Function: ion binding (GO:0043167);;	--	--	[T]	Signal transduction mechanisms	Putative GTPase activating protein for Arf	Uncharacterized protein GN=PRUPE_ppa001945mg OS=Prunus persica (Peach) PE=4 SV=1	T	Signal transduction mechanisms	PREDICTED: uncharacterized LOC101209764 [Cucumis sativus]
Csa7G428840	--	--	Biological Process: meiotic DNA double-strand break processing (GO:0000706);; Molecular Function: 3-hydroxybutyrate dehydrogenase activity (GO:0003858);; Cellular Component: peroxisome (GO:0005777);; Cellular Component: cytosol (GO:0005829);; Biological Process: response to oxidative stress (GO:0006979);; Biological Process: gamete generation (GO:0007276);; Biological Process: response to ionizin…	--	--	[R]	General function prediction only	DNA repair protein endonuclease SAE2/CtIP C-terminus	Putative uncharacterized protein GN=VIT_13s0064g01250 OS=Vitis vinifera (Grape) PE=4 SV=1	R	General function prediction only	PREDICTED: protein gamma response 1-like [Cucumis sativus]
Csa3G728040	--	--	Cellular Component: intracellular membrane-bounded organelle (GO:0043231);;	--	--	--	--	--	Uncharacterized protein GN=PRUPE_ppa006113mg OS=Prunus persica (Peach) PE=4 SV=1	S	Function unknown	Uncharacterized protein TCM_019697 [Theobroma cacao]
Csa4G645820	[K]	Transcription	Biological Process: transcription, DNA-templated (GO:0006351);; Biological Process: protein acetylation (GO:0006473);; Biological Process: response to cytokinin (GO:0009735);; Biological Process: primary metabolic process (GO:0044238);; Biological Process: cellular macromolecule metabolic process (GO:0044260);;	K09338|5.18124e-123|csv:101212868|homeobox-leucine zipper protein HAT22-like; K09338 homeobox-leucine zipper protein (A)	--	[K]	Transcription	Homeobox domain;; Homeobox associated leucine zipper	Homeobox protein, putative GN=RCOM_1585300 OS=Ricinus communis (Castor bean) PE=3 SV=1	K	Transcription	PREDICTED: homeobox-leucine zipper protein HAT22-like [Cucumis sativus]
Csa1G418810	--	--	Molecular Function: ATP binding (GO:0005524);; Cellular Component: mitochondrion (GO:0005739);; Biological Process: I-kappaB phosphorylation (GO:0007252);; Molecular Function: IkappaB kinase activity (GO:0008384);;	--	--	[T]	Signal transduction mechanisms	--	Serine-threonine protein kinase, plant-type, putative GN=RCOM_0270330 OS=Ricinus communis (Castor bean) PE=3 SV=1	T	Signal transduction mechanisms	PREDICTED: PTI1-like tyrosine-protein kinase At3g15890-like [Cucumis sativus]
Csa1G071890	[C]	Energy production and conversion	Molecular Function: calcium ion binding (GO:0005509);; Molecular Function: NADH dehydrogenase (ubiquinone) activity (GO:0008137);; Cellular Component: plastid (GO:0009536);; Molecular Function: disulfide oxidoreductase activity (GO:0015036);; Cellular Component: extrinsic component of mitochondrial inner membrane (GO:0031314);; Molecular Function: flavin adenine dinucleotide binding (GO:0050660);…	K17871|0|csv:101228770|NAD(P)H dehydrogenase B3, mitochondrial-like; K17871 NADH:ubiquinone reductase (non-electrogenic) [EC:1.6.5.9] (A)	--	[C]	Energy production and conversion	Pyridine nucleotide-disulphide oxidoreductase;; Pyridine nucleotide-disulphide oxidoreductase;; Pyridine nucleotide-disulphide oxidoreductase;; EF hand	Uncharacterized protein GN=PRUPE_ppa003286mg OS=Prunus persica (Peach) PE=4 SV=1	C	Energy production and conversion	PREDICTED: NAD(P)H dehydrogenase B3, mitochondrial-like [Cucumis sativus]
Csa4G627800	--	--	Molecular Function: receptor serine/threonine kinase binding (GO:0033612);; Cellular Component: apoplast (GO:0048046);;	--	--	--	--	--	Uncharacterized protein GN=CARUB_v10021925mg OS=Capsella rubella PE=4 SV=1	--	--	hypothetical protein CARUB_v10021925mg [Capsella rubella]
Csa2G059200	--	--	Molecular Function: sequence-specific DNA binding transcription factor activity (GO:0003700);; Cellular Component: nucleus (GO:0005634);; Biological Process: regulation of transcription, DNA-templated (GO:0006355);; Biological Process: auxin-activated signaling pathway (GO:0009734);; Molecular Function: protein dimerization activity (GO:0046983);;	--	--	--	--	AUX/IAA family	Transcription factor, putative GN=RCOM_0306050 OS=Ricinus communis (Castor bean) PE=4 SV=1	K	Transcription	PREDICTED: auxin-responsive protein IAA33-like [Cucumis sativus]
Csa3G484840	[K]	Transcription	Biological Process: cell fate specification (GO:0001708);; Molecular Function: DNA binding (GO:0003677);; Biological Process: epidermal cell differentiation (GO:0009913);; Biological Process: regulation of cellular process (GO:0050794);;	K09338|0|csv:101221341|homeobox-leucine zipper protein GLABRA 2-like; K09338 homeobox-leucine zipper protein (A)	--	--	--	START domain;; Homeobox domain;; Homeobox KN domain	Putative uncharacterized protein GN=VIT_09s0002g04340 OS=Vitis vinifera (Grape) PE=2 SV=1	K	Transcription	PREDICTED: homeobox-leucine zipper protein GLABRA 2-like [Cucumis sativus]
CsaUNG027970	[C]	Energy production and conversion	--	--	--	[C]	Energy production and conversion	Aldo/keto reductase family	Predicted protein (Fragment) GN=POPTRDRAFT_246410 OS=Populus trichocarpa (Western balsam poplar) PE=2 SV=1	C	Energy production and conversion	PREDICTED: probable aldo-keto reductase 2-like [Cucumis sativus]
Cucumber_newGene_575	[L]	Replication, recombination and repair	--	K03654|0|csv:101222268|ATP-dependent DNA helicase RecQ-like; K03654 ATP-dependent DNA helicase RecQ [EC:3.6.4.12] (A)	RNA degradation (ko03018)	[L]	Replication, recombination and repair	RQC domain;; Helicase conserved C-terminal domain;; Helix-turn-helix domain;; HRDC domain	Mediator of RNA polymerase II transcription subunit 34 GN=At1g31360 OS=Arabidopsis thaliana (Mouse-ear cress) PE=1 SV=1	A	RNA processing and modification	PREDICTED: ATP-dependent DNA helicase RecQ-like [Cucumis sativus]
Csa6G148170	--	--	--	--	--	--	--	Protein of unknown function (DUF1635)	Uncharacterized protein GN=PRUPE_ppa009918mg OS=Prunus persica (Peach) PE=4 SV=1	S	Function unknown	PREDICTED: uncharacterized LOC101221076 isoform 2 [Cucumis sativus]
Csa7G398720	--	--	Molecular Function: hydrolase activity, acting on glycosyl bonds (GO:0016798);;	K01213|1.51869e-146|csv:101221903|exopolygalacturonase clone GBGE184-like; K01213 galacturan 1,4-alpha-galacturonidase [EC:3.2.1.67] (A)	Pentose and glucuronate interconversions (ko00040);; Starch and sucrose metabolism (ko00500)	--	--	Glycosyl hydrolases family 28	Predicted protein GN=POPTRDRAFT_552472 OS=Populus trichocarpa (Western balsam poplar) PE=4 SV=1	R	General function prediction only	PREDICTED: exopolygalacturonase clone GBGE184-like [Cucumis sativus]
Csa3G189860	[J]	Translation, ribosomal structure and biogenesis	Molecular Function: aminopeptidase activity (GO:0004177);; Cellular Component: cytoplasm (GO:0005737);; Biological Process: proteolysis (GO:0006508);; Molecular Function: metalloexopeptidase activity (GO:0008235);; Biological Process: cellular process (GO:0009987);; Biological Process: vernalization response (GO:0010048);; Biological Process: protein processing (GO:0016485);; Molecular Function: …	K01265|0|cmo:103496871|methionine aminopeptidase 2B-like; K01265 methionyl aminopeptidase [EC:3.4.11.18] (A)	--	[R]	General function prediction only	Metallopeptidase family M24	Methionine aminopeptidase GN=RCOM_0364790 OS=Ricinus communis (Castor bean) PE=3 SV=1	R	General function prediction only	PREDICTED: methionine aminopeptidase 2B-like [Cucumis sativus]
Csa1G111370	[G]	Carbohydrate transport and metabolism	Cellular Component: nucleus (GO:0005634);; Biological Process: myo-inositol hexakisphosphate biosynthetic process (GO:0010264);;	--	--	--	--	AAA domain	Putative uncharacterized protein GN=RCOM_0875760 OS=Ricinus communis (Castor bean) PE=4 SV=1	S	Function unknown	PREDICTED: uncharacterized protein DDB_G0273453/DDB_G0273565-like [Cucumis sativus]
Csa6G451480	[J]	Translation, ribosomal structure and biogenesis	Cellular Component: ribonucleoprotein complex (GO:0030529);;	K02943|2.9427e-69|csv:101207343|60S acidic ribosomal protein P2B-like; K02943 large subunit ribosomal protein LP2 (A)	Ribosome (ko03010)	[J]	Translation, ribosomal structure and biogenesis	60s Acidic ribosomal protein	Putative uncharacterized protein OS=Vitis vinifera (Grape) PE=3 SV=1	J	Translation, ribosomal structure and biogenesis	PREDICTED: 60S acidic ribosomal protein P2B-like [Cucumis sativus]
Csa7G446990	[J]	Translation, ribosomal structure and biogenesis	Cellular Component: plastid small ribosomal subunit (GO:0000312);; Molecular Function: structural constituent of ribosome (GO:0003735);; Cellular Component: chloroplast thylakoid (GO:0009534);; Cellular Component: chloroplast stroma (GO:0009570);; Cellular Component: chloroplast envelope (GO:0009941);; Molecular Function: rRNA binding (GO:0019843);; Cellular Component: cytosolic small ribosomal s…	K02961|1.09878e-59|csv:101224490|30S ribosomal protein S17, chloroplastic-like; K02961 small subunit ribosomal protein S17 (A)	Ribosome (ko03010)	[J]	Translation, ribosomal structure and biogenesis	Ribosomal protein S17	Predicted protein GN=POPTRDRAFT_705737 OS=Populus trichocarpa (Western balsam poplar) PE=3 SV=1	J	Translation, ribosomal structure and biogenesis	PREDICTED: 30S ribosomal protein S17, chloroplastic-like [Cucumis sativus]
Csa5G060150	--	--	--	--	--	--	--	--	Predicted protein GN=POPTRDRAFT_564627 OS=Populus trichocarpa (Western balsam poplar) PE=4 SV=1	T	Signal transduction mechanisms	predicted protein [Populus trichocarpa]
Csa7G432150	--	--	Molecular Function: ubiquitin-protein transferase activity (GO:0004842);; Cellular Component: nucleus (GO:0005634);; Biological Process: ubiquitin-dependent protein catabolic process (GO:0006511);; Biological Process: protein ubiquitination (GO:0016567);;	K10268|0|csv:101212290|F-box/LRR-repeat protein 14-like; K10268 F-box and leucine-rich repeat protein 2/20 (A)	--	[R]	General function prediction only	Leucine Rich repeat	Predicted protein GN=POPTRDRAFT_668368 OS=Populus trichocarpa (Western balsam poplar) PE=4 SV=1	R	General function prediction only	PREDICTED: F-box/LRR-repeat protein 14-like [Cucumis sativus]
Csa2G354960	[S]	Function unknown	Molecular Function: nucleotide binding (GO:0000166);; Molecular Function: protein kinase activity (GO:0004672);; Cellular Component: plastid (GO:0009536);; Cellular Component: membrane (GO:0016020);; Biological Process: phosphorylation (GO:0016310);; Molecular Function: oxidoreductase activity (GO:0016491);;	--	--	--	--	Leucine rich repeat;; Leucine Rich repeats (2 copies);; Protein kinase domain;; Protein tyrosine kinase;; Leucine Rich Repeat;; Leucine Rich repeat;; Leucine rich repeat N-terminal domain	Serine-threonine protein kinase, plant-type, putative GN=RCOM_1186860 OS=Ricinus communis (Castor bean) PE=4 SV=1	T	Signal transduction mechanisms	PREDICTED: probable LRR receptor-like serine/threonine-protein kinase At3g47570-like [Cucumis sativus]
Csa1G181530	--	--	--	--	--	--	--	Protein of unknown function (DUF1685)	Putative uncharacterized protein OS=Cucumis melo subsp. melo PE=4 SV=1	S	Function unknown	hypothetical protein [Cucumis melo subsp. melo]
Csa4G495220	[R]	General function prediction only	Cellular Component: plastid (GO:0009536);; Molecular Function: adenyl nucleotide binding (GO:0030554);;	--	--	--	--	CBS domain;; PB1 domain	Uncharacterized protein GN=PRUPE_ppa003919mg OS=Prunus persica (Peach) PE=4 SV=1	S	Function unknown	PREDICTED: CBS domain-containing protein CBSCBSPB3-like [Cucumis sativus]
Csa3G810510	--	--	Biological Process: photoperiodism, flowering (GO:0048573);;	--	--	--	--	Helix-loop-helix DNA-binding domain	DNA binding protein, putative GN=RCOM_0405730 OS=Ricinus communis (Castor bean) PE=4 SV=1	K	Transcription	PREDICTED: transcription factor bHLH130-like [Cucumis sativus]
Csa7G342760	--	--	Cellular Component: cytosol (GO:0005829);; Biological Process: pyrimidine ribonucleotide biosynthetic process (GO:0009220);; Cellular Component: chloroplast stroma (GO:0009570);; Molecular Function: sequence-specific DNA binding (GO:0043565);;	--	--	[R]	General function prediction only	--	Putative uncharacterized protein GN=VIT_08s0040g01630 OS=Vitis vinifera (Grape) PE=4 SV=1	R	General function prediction only	PREDICTED: translin-like, partial [Cucumis sativus]
Csa4G004990	--	--	--	--	--	--	--	Protein of unknown function (DUF4050)	Uncharacterized protein OS=Glycine max (Soybean) PE=4 SV=1	R	General function prediction only	PREDICTED: uncharacterized protein LOC101214679 isoform 1 [Cucumis sativus]
Csa7G433290	--	--	--	--	--	--	--	Protein of unknown function (DUF1644)	Uncharacterized protein GN=PRUPE_ppa006020mg OS=Prunus persica (Peach) PE=4 SV=1	S	Function unknown	PREDICTED: uncharacterized protein LOC101204433 [Cucumis sativus]
Csa7G397000	[T]	Signal transduction mechanisms	Biological Process: response to molecule of fungal origin (GO:0002238);; Cellular Component: vacuole (GO:0005773);; Cellular Component: Golgi apparatus (GO:0005794);; Cellular Component: plasma membrane (GO:0005886);;	--	--	--	--	Universal stress protein family	Putative uncharacterized protein GN=VIT_07s0005g00290 OS=Vitis vinifera (Grape) PE=4 SV=1	S	Function unknown	PREDICTED: universal stress protein A-like protein-like [Cucumis sativus]
Csa6G108610	--	--	--	--	--	--	--	--	Putative uncharacterized protein GN=VIT_07s0005g06110 OS=Vitis vinifera (Grape) PE=4 SV=1	S	Function unknown	PREDICTED: uncharacterized protein LOC100263724 [Vitis vinifera]
Csa3G164480	[Q]	Secondary metabolites biosynthesis, transport and catabolism	Molecular Function: copper ion binding (GO:0005507);; Cellular Component: mitochondrion (GO:0005739);; Biological Process: fatty acid beta-oxidation (GO:0006635);; Molecular Function: hydrolase activity (GO:0016787);; Molecular Function: isomerase activity (GO:0016853);; Molecular Function: 5-oxopent-3-ene-1,2,5-tricarboxylate decarboxylase activity (GO:0018800);;	K01557|2.78697e-149|csv:101207065|acylpyruvase FAHD1, mitochondrial-like; K01557 acylpyruvate hydrolase [EC:3.7.1.5] (A)	Tyrosine metabolism (ko00350)	[R]	General function prediction only	Fumarylacetoacetate (FAA) hydrolase family	Fumarylacetoacetate hydrolase, putative GN=RCOM_0681980 OS=Ricinus communis (Castor bean) PE=4 SV=1	R	General function prediction only	PREDICTED: acylpyruvase FAHD1, mitochondrial-like [Cucumis sativus]
Csa5G052540	[R]	General function prediction only	Molecular Function: oxidoreductase activity, acting on paired donors, with incorporation or reduction of molecular oxygen, 2-oxoglutarate as one donor, and incorporation of one atom each of oxygen into both donors (GO:0016706);; Biological Process: single-organism metabolic process (GO:0044710);;	K06892|0|csv:101220829|gibberellin 2-beta-dioxygenase 8-like; K04125 gibberellin 2-oxidase [EC:1.14.11.13] (A)	--	[QR]	Secondary metabolites biosynthesis, transport and catabolism;; General function prediction only	2OG-Fe(II) oxygenase superfamily;; non-haem dioxygenase in morphine synthesis N-terminal	Gibberellin 20-oxidase, putative GN=RCOM_0814470 OS=Ricinus communis (Castor bean) PE=3 SV=1	Q	Secondary metabolites biosynthesis, transport and catabolism	PREDICTED: gibberellin 2-beta-dioxygenase 8-like [Cucumis sativus]
Csa6G502050	--	--	Molecular Function: nucleic acid binding (GO:0003676);; Molecular Function: sequence-specific DNA binding transcription factor activity (GO:0003700);; Molecular Function: binding (GO:0005488);; Molecular Function: protein binding (GO:0005515);; Cellular Component: nucleus (GO:0005634);; Biological Process: regulation of transcription, DNA-templated (GO:0006355);; Molecular Function: zinc ion bind…	--	--	[R]	General function prediction only	Zinc finger, C2H2 type	Uncharacterized protein GN=PRUPE_ppa004299mg OS=Prunus persica (Peach) PE=4 SV=1	R	General function prediction only	PREDICTED: uncharacterized protein LOC101217597 [Cucumis sativus]
Csa7G232580	--	--	Biological Process: lipid transport (GO:0006869);; Molecular Function: lipid binding (GO:0008289);;	--	--	--	--	--	Uncharacterized protein OS=Lotus japonicus (Lotus corniculatus var. japonicus) PE=2 SV=1	R	General function prediction only	unknown [Lotus japonicus]
Csa1G009630	[G]	Carbohydrate transport and metabolism	Molecular Function: aldose 1-epimerase activity (GO:0004034);; Cellular Component: cytoplasm (GO:0005737);; Biological Process: galactose metabolic process (GO:0006012);; Molecular Function: carbohydrate binding (GO:0030246);;	K01785|0|csv:101228895|aldose 1-epimerase-like; K01785 aldose 1-epimerase [EC:5.1.3.3] (A)	Glycolysis / Gluconeogenesis (ko00010);; Galactose metabolism (ko00052)	[G]	Carbohydrate transport and metabolism	Aldose 1-epimerase	Aldose 1-epimerase GN=VIT_17s0000g05870 OS=Vitis vinifera (Grape) PE=3 SV=1	G	Carbohydrate transport and metabolism	PREDICTED: aldose 1-epimerase-like [Cucumis sativus]
Csa6G417900	--	--	Cellular Component: nucleus (GO:0005634);; Cellular Component: plasmodesma (GO:0009506);;	--	--	[T]	Signal transduction mechanisms	T-complex protein 11	Putative uncharacterized protein GN=VIT_12s0034g02390 OS=Vitis vinifera (Grape) PE=4 SV=1	T	Signal transduction mechanisms	PREDICTED: uncharacterized LOC101216796 [Cucumis sativus]
Csa3G061010	[R]	General function prediction only	Molecular Function: nucleotide binding (GO:0000166);; Cellular Component: cytoplasm (GO:0005737);; Biological Process: production of ta-siRNAs involved in RNA interference (GO:0010267);; Cellular Component: Cul4-RING E3 ubiquitin ligase complex (GO:0080008);;	K12880|0|csv:101219355|THO complex subunit 3-like; K12880 THO complex subunit 3 (A)	RNA transport (ko03013);; Spliceosome (ko03040)	[S]	Function unknown	WD domain, G-beta repeat;; Eukaryotic translation initiation factor eIF2A;; Anaphase-promoting complex subunit 4 WD40 domain	Putative uncharacterized protein GN=VIT_19s0015g01220 OS=Vitis vinifera (Grape) PE=4 SV=1	R	General function prediction only	PREDICTED: THO complex subunit 3-like [Cucumis sativus]
Csa3G055970	--	--	Biological Process: mRNA splicing, via spliceosome (GO:0000398);; Cellular Component: spliceosomal complex (GO:0005681);;	K12863|1.5394e-93|csv:101218170|protein CWC15 homolog A-like; K12863 protein CWC15 (A)	Spliceosome (ko03040)	[S]	Function unknown	Cwf15/Cwc15 cell cycle control protein	Uncharacterized protein OS=Glycine max (Soybean) PE=4 SV=1	S	Function unknown	PREDICTED: protein CWC15 homolog A-like [Cucumis sativus]
Csa2G006090	--	--	Biological Process: nodulation (GO:0009877);; Cellular Component: integral component of membrane (GO:0016021);;	--	--	--	--	Early nodulin 93 ENOD93 protein	Early nodulin, putative GN=RCOM_0220910 OS=Ricinus communis (Castor bean) PE=4 SV=1	S	Function unknown	PREDICTED: early nodulin-93-like [Cucumis sativus]
Csa1G001290	--	--	Biological Process: transport (GO:0006810);; Cellular Component: membrane (GO:0016020);; Biological Process: single-organism process (GO:0044699);;	K15382|0|csv:101221611|bidirectional sugar transporter SWEET12-like; K15382 solute carrier family 50 (sugar transporter) (A)	--	[R]	General function prediction only	Sugar efflux transporter for intercellular exchange	Putative uncharacterized protein GN=RCOM_1504890 OS=Ricinus communis (Castor bean) PE=4 SV=1	R	General function prediction only	PREDICTED: bidirectional sugar transporter SWEET12-like [Cucumis sativus]
Csa3G808350	--	--	Cellular Component: nucleosome (GO:0000786);; Molecular Function: DNA binding (GO:0003677);; Biological Process: nucleosome assembly (GO:0006334);;	--	--	--	--	--	Uncharacterized protein (Fragment) GN=OB04G17350 OS=Oryza brachyantha PE=4 SV=1	--	--	unknown [Glycine max]
Csa5G430000	--	--	Cellular Component: exocyst (GO:0000145);; Cellular Component: nucleus (GO:0005634);; Cellular Component: cytosol (GO:0005829);; Biological Process: exocytosis (GO:0006887);; Biological Process: plant-type cell wall modification (GO:0009827);; Biological Process: pollen tube growth (GO:0009860);;	K07195|0|csv:101224679|exocyst complex component 7-like; K07195 exocyst complex component 7 (A)	--	[U]	Intracellular trafficking, secretion, and vesicular transport	Exo70 exocyst complex subunit	Uncharacterized protein GN=PRUPE_ppa017989mg OS=Prunus persica (Peach) PE=4 SV=1	U	Intracellular trafficking, secretion, and vesicular transport	PREDICTED: exocyst complex component 7-like [Cucumis sativus]
Csa1G539330	[C]	Energy production and conversion	Molecular Function: oxidoreductase activity, acting on CH-OH group of donors (GO:0016614);;	--	--	--	--	Berberine and berberine like	Predicted protein GN=POPTRDRAFT_933896 OS=Populus trichocarpa (Western balsam poplar) PE=4 SV=1	R	General function prediction only	PREDICTED: LOW QUALITY PROTEIN: reticuline oxidase-like protein-like [Cucumis sativus]
Csa2G000790	--	--	Biological Process: response to oxidative stress (GO:0006979);; Cellular Component: nuclear speck (GO:0016607);; Biological Process: response to cadmium ion (GO:0046686);;	--	--	[K]	Transcription	--	Putative uncharacterized protein GN=RCOM_1049080 OS=Ricinus communis (Castor bean) PE=4 SV=1	K	Transcription	PREDICTED: uncharacterized protein LOC101219805 [Cucumis sativus]
Csa5G604210	[DZ]	Cell cycle control, cell division, chromosome partitioning;; Cytoskeleton	Molecular Function: binding (GO:0005488);; Cellular Component: cytoplasm (GO:0005737);; Molecular Function: Ran GTPase binding (GO:0008536);;	--	--	[S]	Function unknown	Regulator of chromosome condensation (RCC1) repeat;; Regulator of chromosome condensation (RCC1) repeat	Uncharacterized protein GN=PRUPE_ppa006576mg OS=Prunus persica (Peach) PE=4 SV=1	S	Function unknown	PREDICTED: probable E3 ubiquitin-protein ligase HERC1-like [Cucumis sativus]
Csa2G222130	--	--	--	--	--	--	--	Protein of unknown function (DUF4005);; IQ calmodulin-binding motif	Uncharacterized protein GN=PRUPE_ppa022210mg OS=Prunus persica (Peach) PE=4 SV=1	S	Function unknown	PREDICTED: uncharacterized protein LOC101212161 [Cucumis sativus]
Csa6G501930	--	--	Cellular Component: vacuole (GO:0005773);; Biological Process: regulation of transcription, DNA-templated (GO:0006355);;	K14503|5.45487e-178|csv:101231601|BES1/BZR1 homolog protein 2-like; K14503 brassinosteroid resistant 1/2 (A)	Plant hormone signal transduction (ko04075)	--	--	Plant protein of unknown function (DUF822)	Uncharacterized protein GN=PRUPE_ppa008842mg OS=Prunus persica (Peach) PE=4 SV=1	K	Transcription	PREDICTED: BES1/BZR1 homolog protein 2-like [Cucumis sativus]
Csa6G430740	--	--	Cellular Component: endosome (GO:0005768);; Cellular Component: Golgi apparatus (GO:0005794);; Cellular Component: trans-Golgi network (GO:0005802);;	--	--	--	--	--	Uncharacterized protein GN=PRUPE_ppa007737mg OS=Prunus persica (Peach) PE=4 SV=1	S	Function unknown	PREDICTED: uncharacterized protein LOC101207236 [Cucumis sativus]
Csa5G157270	--	--	Molecular Function: binding (GO:0005488);; Molecular Function: oxidoreductase activity (GO:0016491);; Molecular Function: metal ion binding (GO:0046872);;	--	--	[Q]	Secondary metabolites biosynthesis, transport and catabolism	Cytochrome P450	Uncharacterized protein GN=PRUPE_ppa004606mg OS=Prunus persica (Peach) PE=4 SV=1	Q	Secondary metabolites biosynthesis, transport and catabolism	PREDICTED: geraniol 8-hydroxylase-like, partial [Cucumis sativus]
Csa5G605160	--	--	Cellular Component: mitochondrion (GO:0005739);; Cellular Component: chloroplast (GO:0009507);; Biological Process: mRNA modification (GO:0016556);; Biological Process: chloroplast RNA processing (GO:0031425);;	--	--	[R]	General function prediction only	PPR repeat family;; PPR repeat;; Pentatricopeptide repeat domain;; PPR repeat;; DYW family of nucleic acid deaminases	Putative uncharacterized protein GN=VIT_01s0026g02510 OS=Vitis vinifera (Grape) PE=4 SV=1	R	General function prediction only	PREDICTED: pentatricopeptide repeat-containing protein At2g02980-like [Cucumis sativus]
Csa2G023860	[J]	Translation, ribosomal structure and biogenesis	Molecular Function: structural constituent of ribosome (GO:0003735);; Cellular Component: mitochondrion (GO:0005739);; Cellular Component: ribosome (GO:0005840);; Biological Process: translation (GO:0006412);; Cellular Component: chloroplast (GO:0009507);;	K02899|3.68349e-105|csv:101226646|50S ribosomal protein L27-like; K02899 large subunit ribosomal protein L27 (A)	Ribosome (ko03010)	[J]	Translation, ribosomal structure and biogenesis	Ribosomal L27 protein	Mitochondrial 50S ribosomal protein L27 GN=mRPL27 OS=Hevea brasiliensis (Para rubber tree) PE=2 SV=1	J	Translation, ribosomal structure and biogenesis	PREDICTED: 50S ribosomal protein L27-like [Cucumis sativus]
Csa3G002760	--	--	Cellular Component: extracellular region (GO:0005576);; Cellular Component: anchored component of membrane (GO:0031225);; Biological Process: response to other organism (GO:0051707);;	--	--	--	--	Thaumatin family	Thaumatin-like protein OS=Cucumis melo subsp. melo PE=4 SV=1	R	General function prediction only	PREDICTED: thaumatin-like protein 1-like [Cucumis sativus]
Csa4G293870	--	--	Cellular Component: nucleosome (GO:0000786);; Molecular Function: DNA binding (GO:0003677);; Cellular Component: nucleus (GO:0005634);; Biological Process: nucleosome assembly (GO:0006334);; Molecular Function: protein heterodimerization activity (GO:0046982);;	K11251|6.53386e-54|csv:101217199|probable histone H2A.4-like; K11251 histone H2A (A)	--	[B]	Chromatin structure and dynamics	Core histone H2A/H2B/H3/H4	Histone H2A OS=Glycine max (Soybean) PE=2 SV=1	B	Chromatin structure and dynamics	PREDICTED: probable histone H2A.4-like [Cucumis sativus]
Csa5G146910	--	--	Cellular Component: vacuole (GO:0005773);;	--	--	[I]	Lipid transport and metabolism	--	Putative uncharacterized protein GN=VIT_02s0025g02820 OS=Vitis vinifera (Grape) PE=4 SV=1	I	Lipid transport and metabolism	PREDICTED: uncharacterized protein LOC101209462 [Cucumis sativus]
Csa5G198190	--	--	Molecular Function: hydrolase activity, hydrolyzing O-glycosyl compounds (GO:0004553);; Cellular Component: extracellular region (GO:0005576);; Biological Process: carbohydrate metabolic process (GO:0005975);; Molecular Function: cation binding (GO:0043169);;	--	--	--	--	Glycosyl hydrolases family 17	Putative uncharacterized protein GN=VIT_13s0019g03300 OS=Vitis vinifera (Grape) PE=3 SV=1	R	General function prediction only	PREDICTED: probable glucan endo-1,3-beta-glucosidase A6-like [Cucumis sativus]
Csa2G034740	--	--	Molecular Function: GTP binding (GO:0005525);; Cellular Component: intracellular (GO:0005622);; Biological Process: small GTPase mediated signal transduction (GO:0007264);; Cellular Component: membrane (GO:0016020);;	--	--	--	--	--	Uncharacterized protein GN=Solyc01g100880.2 OS=Solanum lycopersicum (Tomato) PE=4 SV=1	S	Function unknown	PREDICTED: auxin-induced protein 5NG4-like [Cucumis sativus]
Csa6G487580	--	--	Cellular Component: nucleus (GO:0005634);; Cellular Component: plasma membrane (GO:0005886);; Biological Process: phosphatidylinositol biosynthetic process (GO:0006661);;	--	--	--	--	--	Putative uncharacterized protein GN=VIT_07s0031g01630 OS=Vitis vinifera (Grape) PE=4 SV=1	S	Function unknown	PREDICTED: uncharacterized protein LOC101206523 [Cucumis sativus]
Csa6G055950	--	--	Biological Process: maltose metabolic process (GO:0000023);; Cellular Component: chloroplast (GO:0009507);; Biological Process: carotenoid biosynthetic process (GO:0016117);; Biological Process: starch biosynthetic process (GO:0019252);; Molecular Function: 5-formyltetrahydrofolate cyclo-ligase activity (GO:0030272);; Biological Process: primary metabolic process (GO:0044238);; Biological Process…	--	--	[H]	Coenzyme transport and metabolism	--	Uncharacterized protein GN=PRUPE_ppa017090mg OS=Prunus persica (Peach) PE=4 SV=1	H	Coenzyme transport and metabolism	PREDICTED: methenyltetrahydrofolate synthase domain-containing protein-like, partial [Cucumis sativus]
Csa3G164520	[I]	Lipid transport and metabolism	Molecular Function: acyl-CoA dehydrogenase activity (GO:0003995);; Cellular Component: cytosol (GO:0005829);; Biological Process: response to symbiotic fungus (GO:0009610);; Molecular Function: transferase activity, transferring phosphorus-containing groups (GO:0016772);; Biological Process: root hair elongation (GO:0048767);; Molecular Function: flavin adenine dinucleotide binding (GO:0050660);;…	K00249|0|csv:101223565|acyl-CoA dehydrogenase family member 10-like; K00249 acyl-CoA dehydrogenase [EC:1.3.8.7] (A)	Fatty acid degradation (ko00071);; Valine, leucine and isoleucine degradation (ko00280);; beta-Alanine metabolism (ko00410);; Propanoate metabolism (ko00640);; Carbon metabolism (ko01200);; Fatty acid metabolism (ko01212)	[R]	General function prediction only	Phosphotransferase enzyme family;; Acyl-CoA dehydrogenase, C-terminal domain;; Acyl-CoA dehydrogenase, middle domain;; Acyl-CoA dehydrogenase, C-terminal domain;; Acyl-CoA dehydrogenase, N-terminal domain;; Choline/ethanolamine kinase	Putative uncharacterized protein GN=VIT_05s0077g01940 OS=Vitis vinifera (Grape) PE=3 SV=1	I	Lipid transport and metabolism	PREDICTED: acyl-CoA dehydrogenase family member 10-like [Cucumis sativus]
Csa6G079180	--	--	Biological Process: transition metal ion transport (GO:0000041);; Molecular Function: DNA binding (GO:0003677);; Cellular Component: cytoplasm (GO:0005737);; Biological Process: toxin catabolic process (GO:0009407);; Biological Process: regulation of anion channel activity (GO:0010359);; Biological Process: response to cyclopentenone (GO:0010583);; Biological Process: floral organ development (GO…	--	--	--	--	Domain of unknown function (DUF296)	Uncharacterized protein OS=Glycine max (Soybean) PE=4 SV=1	S	Function unknown	PREDICTED: putative DNA-binding protein ESCAROLA-like [Cucumis sativus]
Csa3G630240	--	--	Biological Process: cellular process (GO:0009987);; Biological Process: innate immune response (GO:0045087);;	K13456|4.93719e-39|csv:101224495|RPM1-interacting protein 4-like; K13456 RPM1-interacting protein 4 (A)	Plant-pathogen interaction (ko04626)	--	--	Cleavage site for pathogenic type III effector avirulence factor Avr	Uncharacterized protein GN=PGSC0003DMG400027945 OS=Solanum tuberosum (Potato) PE=4 SV=1	T	Signal transduction mechanisms	PREDICTED: RPM1-interacting protein 4-like [Cucumis sativus]
Csa6G518930	[GHR]	Carbohydrate transport and metabolism;; Coenzyme transport and metabolism;; General function prediction only	Molecular Function: magnesium ion binding (GO:0000287);; Biological Process: response to hypoxia (GO:0001666);; Molecular Function: pyruvate decarboxylase activity (GO:0004737);; Biological Process: metabolic process (GO:0008152);; Cellular Component: membrane (GO:0016020);; Molecular Function: thiamine pyrophosphate binding (GO:0030976);;	K01568|0|csv:101229288|pyruvate decarboxylase isozyme 1-like; K01568 pyruvate decarboxylase [EC:4.1.1.1] (A)	Glycolysis / Gluconeogenesis (ko00010)	[EH]	Amino acid transport and metabolism;; Coenzyme transport and metabolism	Thiamine pyrophosphate enzyme, N-terminal TPP binding domain;; Thiamine pyrophosphate enzyme, central domain;; Thiamine pyrophosphate enzyme, C-terminal TPP binding domain	Uncharacterized protein OS=Glycine max (Soybean) PE=3 SV=1	EH	Amino acid transport and metabolism;; Coenzyme transport and metabolism	PREDICTED: pyruvate decarboxylase isozyme 1-like [Cucumis sativus]
Csa4G664440	[GEPR]	Carbohydrate transport and metabolism;; Amino acid transport and metabolism;; Inorganic ion transport and metabolism;; General function prediction only	Molecular Function: sugar:proton symporter activity (GO:0005351);; Cellular Component: plasma membrane (GO:0005886);; Biological Process: phosphate ion transport (GO:0006817);; Cellular Component: chloroplast (GO:0009507);; Molecular Function: phosphate ion transmembrane transporter activity (GO:0015114);; Molecular Function: carbohydrate transmembrane transporter activity (GO:0015144);; Molecula…	K08176|0|csv:101218554|probable inorganic phosphate transporter 1-9-like; K08176 MFS transporter, PHS family, inorganic phosphate transporter (A)	--	[P]	Inorganic ion transport and metabolism	Sugar (and other) transporter;; Major Facilitator Superfamily	Putative uncharacterized protein GN=VIT_18s0122g00780 OS=Vitis vinifera (Grape) PE=4 SV=1	P	Inorganic ion transport and metabolism	PREDICTED: probable inorganic phosphate transporter 1-9-like [Cucumis sativus]
Csa6G014670	--	--	Cellular Component: vacuole (GO:0005773);; Cellular Component: Golgi apparatus (GO:0005794);; Cellular Component: cytosol (GO:0005829);; Biological Process: Golgi organization (GO:0007030);; Biological Process: protein transport (GO:0015031);; Cellular Component: membrane (GO:0016020);;	--	--	[U]	Intracellular trafficking, secretion, and vesicular transport	COG (conserved oligomeric Golgi) complex component, COG2;; Domain of unknown function (DUF3510)	Conserved oligomeric Golgi complex component, putative GN=RCOM_1506590 OS=Ricinus communis (Castor bean) PE=4 SV=1	U	Intracellular trafficking, secretion, and vesicular transport	PREDICTED: conserved oligomeric Golgi complex subunit 2-like [Cucumis sativus]
Csa6G014490	[R]	General function prediction only	Molecular Function: purine nucleobase transmembrane transporter activity (GO:0005345);; Biological Process: adenine transport (GO:0015853);; Biological Process: guanine transport (GO:0015854);; Biological Process: nucleobase-containing compound transport (GO:0015931);; Cellular Component: membrane (GO:0016020);; Biological Process: transmembrane transport (GO:0055085);;	K06901|0|csv:101231268|adenine/guanine permease AZG1-like; K06901 putative MFS transporter, AGZA family, xanthine/uracil permease (A)	--	--	--	Permease family	Uncharacterized protein GN=PRUPE_ppa003358mg OS=Prunus persica (Peach) PE=4 SV=1	S	Function unknown	PREDICTED: adenine/guanine permease AZG1-like [Cucumis sativus]
Csa3G233480	[C]	Energy production and conversion	Molecular Function: magnesium ion binding (GO:0000287);; Cellular Component: cytosol (GO:0005829);; Molecular Function: phosphoglycolate phosphatase activity (GO:0008967);; Cellular Component: chloroplast stroma (GO:0009570);; Molecular Function: lyase activity (GO:0016829);; Biological Process: L-methionine biosynthetic process from methylthioadenosine (GO:0019509);; Molecular Function: acireduc…	K16054|0|cmo:103496078|probable bifunctional methylthioribulose-1-phosphate dehydratase/enolase-phosphatase E1 1; K16054 methylthioribulose 1-phosphate dehydratase / enolase-phosphatase E1 [EC:4.2.1.109 3.1.3.77] (A)	Cysteine and methionine metabolism (ko00270)	[E]	Amino acid transport and metabolism	Haloacid dehalogenase-like hydrolase;; Class II Aldolase and Adducin N-terminal domain	Probable bifunctional methylthioribulose-1-phosphate dehydratase/enolase-phosphatase E1 GN=BRADI3G57750 OS=Brachypodium distachyon (Purple false brome) PE=3 SV=1	E	Amino acid transport and metabolism	unnamed protein product [Vitis vinifera]
Csa6G421040	--	--	Cellular Component: extracellular region (GO:0005576);; Biological Process: carbohydrate metabolic process (GO:0005975);; Molecular Function: cellulase activity (GO:0008810);;	--	--	--	--	Glycosyl hydrolase family 9	Putative uncharacterized protein GN=VIT_12s0059g01250 OS=Vitis vinifera (Grape) PE=4 SV=1	G	Carbohydrate transport and metabolism	PREDICTED: endoglucanase 11-like [Cucumis sativus]
Csa5G409620	[J]	Translation, ribosomal structure and biogenesis	Molecular Function: structural constituent of ribosome (GO:0003735);; Biological Process: translation (GO:0006412);; Cellular Component: cytosolic large ribosomal subunit (GO:0022625);;	K02908|2.88211e-76|csv:101215990|60S ribosomal protein L30-like; K02908 large subunit ribosomal protein L30e (A)	Ribosome (ko03010)	[J]	Translation, ribosomal structure and biogenesis	Ribosomal protein L7Ae/L30e/S12e/Gadd45 family	Uncharacterized protein GN=PGSC0003DMG400018701 OS=Solanum tuberosum (Potato) PE=3 SV=1	J	Translation, ribosomal structure and biogenesis	PREDICTED: 60S ribosomal protein L30-like isoform 1 [Cucumis sativus]
Csa6G518230	--	--	Molecular Function: protein binding (GO:0005515);; Biological Process: response to symbiotic fungus (GO:0009610);; Molecular Function: sequence-specific DNA binding (GO:0043565);; Cellular Component: intracellular part (GO:0044424);; Biological Process: positive regulation of transcription, DNA-templated (GO:0045893);; Biological Process: positive regulation of long-day photoperiodism, flowering …	--	--	--	--	--	Uncharacterized protein GN=PRUPE_ppa004946mg OS=Prunus persica (Peach) PE=4 SV=1	K	Transcription	PREDICTED: transcription factor VOZ1-like [Cucumis sativus]
Csa3G113350	[R]	General function prediction only	Molecular Function: GTP binding (GO:0005525);; Cellular Component: mitochondrion (GO:0005739);;	--	--	[J]	Translation, ribosomal structure and biogenesis	50S ribosome-binding GTPase;; KH-domain-like of EngA bacterial GTPase enzymes, C-terminal;; Ferrous iron transport protein B;; Elongation factor Tu GTP binding domain;; AIG1 family;; Miro-like protein;; Ras family;; Protein of unknown function, DUF258;; Archaeal ATPase;; CobW/HypB/UreG, nucleotide-binding domain;; Dynamin family;; FtsK/SpoIIIE family;; Gtr1/RagA G protein conserved region	Uncharacterized protein GN=PRUPE_ppa002689mg OS=Prunus persica (Peach) PE=4 SV=1	J	Translation, ribosomal structure and biogenesis	PREDICTED: GTPase Der-like [Cucumis sativus]
Csa6G087190	--	--	--	--	--	--	--	--	Putative uncharacterized protein GN=RCOM_1238650 OS=Ricinus communis (Castor bean) PE=4 SV=1	S	Function unknown	PREDICTED: uncharacterized protein LOC101211338 [Cucumis sativus]
Csa3G021130	--	--	Molecular Function: carbon-oxygen lyase activity, acting on phosphates (GO:0016838);;	K15803|0|csv:101209789|(-)-germacrene D synthase-like; K15803 (-)-germacrene D synthase [EC:4.2.3.22 4.2.3.75] (A)	Sesquiterpenoid and triterpenoid biosynthesis (ko00909)	--	--	Terpene synthase family, metal binding domain;; Terpene synthase, N-terminal domain	(E)-beta-caryophyllene synthase OS=Vitis vinifera (Grape) PE=2 SV=1	R	General function prediction only	PREDICTED: (-)-germacrene D synthase-like [Cucumis sativus]
Csa1G051810	--	--	Molecular Function: calcium ion binding (GO:0005509);; Cellular Component: mitochondrion (GO:0005739);; Cellular Component: vacuole (GO:0005773);; Cellular Component: endoplasmic reticulum (GO:0005783);; Cellular Component: endoplasmic reticulum membrane (GO:0005789);; Cellular Component: plasma membrane (GO:0005886);; Biological Process: protein folding (GO:0006457);; Cellular Component: plant-t…	K08054|0|csv:101207554|calnexin homolog 1-like; K08054 calnexin (A)	Protein processing in endoplasmic reticulum (ko04141);; Phagosome (ko04145)	[O]	Posttranslational modification, protein turnover, chaperones	Calreticulin family	Calnexin, putative GN=RCOM_1503060 OS=Ricinus communis (Castor bean) PE=3 SV=1	O	Posttranslational modification, protein turnover, chaperones	PREDICTED: calnexin homolog 1-like [Cucumis sativus]
Csa6G495060	[R]	General function prediction only	Molecular Function: N-acetyltransferase activity (GO:0008080);; Biological Process: metabolic process (GO:0008152);; Biological Process: photomorphogenesis (GO:0009640);; Biological Process: response to ethylene (GO:0009723);; Biological Process: auxin-activated signaling pathway (GO:0009734);; Biological Process: unidimensional cell growth (GO:0009826);;	--	--	--	--	Acetyltransferase (GNAT) family;; FR47-like protein	N-acetyltransferase, putative GN=RCOM_0578960 OS=Ricinus communis (Castor bean) PE=4 SV=1	R	General function prediction only	PREDICTED: uncharacterized LOC101205672 [Cucumis sativus]
Csa5G162040	--	--	Biological Process: cellular component organization (GO:0016043);; Biological Process: single-organism cellular process (GO:0044763);; Molecular Function: metal ion binding (GO:0046872);;	--	--	--	--	EamA-like transporter family	Uncharacterized protein OS=Glycine max (Soybean) PE=4 SV=1	S	Function unknown	PREDICTED: auxin-induced protein 5NG4-like [Cucumis sativus]
Csa5G315360	--	--	Cellular Component: photosystem II (GO:0009523);; Cellular Component: plastid (GO:0009536);; Biological Process: photosynthesis (GO:0015979);;	--	--	--	--	Oxygen evolving enhancer protein 3 (PsbQ)	Putative uncharacterized protein GN=VITISV_006311 OS=Vitis vinifera (Grape) PE=2 SV=1	R	General function prediction only	PREDICTED: psbQ-like protein 3, chloroplastic-like [Cucumis sativus]
Csa5G587210	[J]	Translation, ribosomal structure and biogenesis	Biological Process: mitotic cell cycle (GO:0000278);; Molecular Function: protein binding (GO:0005515);; Cellular Component: mRNA cleavage and polyadenylation specificity factor complex (GO:0005847);; Biological Process: methylation-dependent chromatin silencing (GO:0006346);; Biological Process: mRNA polyadenylation (GO:0006378);; Biological Process: determination of bilateral symmetry (GO:00098…	K14403|0|gmx:100806136|cleavage and polyadenylation specificity factor subunit 3-I-like; K14403 cleavage and polyadenylation specificity factor subunit 3 [EC:3.1.27.-] (A)	mRNA surveillance pathway (ko03015)	[A]	RNA processing and modification	Beta-Casp domain;; Metallo-beta-lactamase superfamily;; Pre-mRNA 3'-end-processing endonuclease polyadenylation factor C-term;; Beta-lactamase superfamily domain;; RNA-metabolising metallo-beta-lactamase	Uncharacterized protein OS=Glycine max (Soybean) PE=4 SV=1	A	RNA processing and modification	PREDICTED: cleavage and polyadenylation specificity factor subunit 3-I-like [Glycine max]
Csa7G318990	--	--	--	--	--	--	--	--	Uncharacterized protein OS=Glycine max (Soybean) PE=2 SV=1	S	Function unknown	PREDICTED: pathogen-related protein-like [Cucumis sativus]
Csa6G018590	--	--	--	--	--	--	--	Plastocyanin-like domain	Uncharacterized protein OS=Glycine max (Soybean) PE=4 SV=1	R	General function prediction only	PREDICTED: uncharacterized protein LOC101211078 [Cucumis sativus]
Csa6G502580	--	--	Cellular Component: nucleus (GO:0005634);; Cellular Component: Golgi apparatus (GO:0005794);; Biological Process: carbohydrate transport (GO:0008643);; Cellular Component: integral component of membrane (GO:0016021);; Molecular Function: transmembrane transporter activity (GO:0022857);; Molecular Function: 2-alkenal reductase [NAD(P)] activity (GO:0032440);; Biological Process: transmembrane tran…	--	--	--	--	Protein of unknown function (DUF1195)	Uncharacterized protein GN=PRUPE_ppa012270mg OS=Prunus persica (Peach) PE=4 SV=1	S	Function unknown	PREDICTED: probable polyol transporter 3-like [Cucumis sativus]
Csa2G439170	--	--	Molecular Function: protein kinase activity (GO:0004672);; Molecular Function: binding (GO:0005488);; Biological Process: phosphorylation (GO:0016310);;	--	--	--	--	Legume lectin domain	Lectin-domain containing receptor kinase A4.2 GN=MTR_8g067690 OS=Medicago truncatula (Barrel medic) PE=3 SV=1	T	Signal transduction mechanisms	PREDICTED: L-type lectin-domain containing receptor kinase IX.1-like, partial [Cucumis sativus]
Csa5G083300	--	--	Biological Process: single-organism process (GO:0044699);;	K13144|0|csv:101204851|uncharacterized LOC101204851; K13144 integrator complex subunit 7 (A)	--	[S]	Function unknown	--	Putative uncharacterized protein GN=VIT_14s0068g00700 OS=Vitis vinifera (Grape) PE=4 SV=1	S	Function unknown	PREDICTED: uncharacterized protein LOC101204851 [Cucumis sativus]
Csa5G627080	[TZDR]	Signal transduction mechanisms;; Cytoskeleton;; Cell cycle control, cell division, chromosome partitioning;; General function prediction only	Molecular Function: calcium ion binding (GO:0005509);; Cellular Component: nucleus (GO:0005634);; Cellular Component: cytoplasm (GO:0005737);; Biological Process: response to cold (GO:0009409);; Molecular Function: 2-alkenal reductase [NAD(P)] activity (GO:0032440);; Biological Process: cellular process involved in reproduction (GO:0048610);; Biological Process: root hair elongation (GO:0048767);…	K13448|4.87194e-108|csv:101214558|probable calcium-binding protein CML25-like; K13448 calcium-binding protein CML (A)	Plant-pathogen interaction (ko04626)	[T]	Signal transduction mechanisms	EF hand;; EF-hand domain pair;; EF-hand domain;; EF-hand domain pair;; EF hand;; Secreted protein acidic and rich in cysteine Ca binding region	Polcalcin Jun o, putative GN=RCOM_0597990 OS=Ricinus communis (Castor bean) PE=4 SV=1	T	Signal transduction mechanisms	PREDICTED: probable calcium-binding protein CML25-like [Cucumis sativus]
Csa1G227460	[I]	Lipid transport and metabolism	Biological Process: lipid metabolic process (GO:0006629);; Biological Process: fatty acid biosynthetic process (GO:0006633);; Molecular Function: oxidoreductase activity, acting on paired donors, with oxidation of a pair of donors resulting in the reduction of molecular oxygen to two molecules of water (GO:0016717);; Biological Process: oxidation-reduction process (GO:0055114);;	K00507|0|cmo:103487416|palmitoyl-monogalactosyldiacylglycerol delta-7 desaturase, chloroplastic-like; K00507 stearoyl-CoA desaturase (delta-9 desaturase) [EC:1.14.19.1] (A)	Biosynthesis of unsaturated fatty acids (ko01040);; Fatty acid metabolism (ko01212)	[I]	Lipid transport and metabolism	Fatty acid desaturase	Uncharacterized protein OS=Glycine max (Soybean) PE=3 SV=1	I	Lipid transport and metabolism	PREDICTED: LOW QUALITY PROTEIN: palmitoyl-monogalactosyldiacylglycerol delta-7 desaturase, chloroplastic-like [Cucumis sativus]
Csa4G043920	--	--	Cellular Component: mitochondrion (GO:0005739);; Cellular Component: vacuolar membrane (GO:0005774);; Cellular Component: plasma membrane (GO:0005886);; Biological Process: fatty acid beta-oxidation (GO:0006635);; Biological Process: autophagy (GO:0006914);; Cellular Component: chloroplast (GO:0009507);; Molecular Function: metal ion binding (GO:0046872);;	--	--	[S]	Function unknown	Protein of unknown function (DUF1640)	Uncharacterized protein GN=PRUPE_ppa010752mg OS=Prunus persica (Peach) PE=4 SV=1	S	Function unknown	PREDICTED: protein FMP32, mitochondrial-like [Cucumis sativus]
Csa7G428210	--	--	--	--	--	--	--	--	Uncharacterized protein OS=Glycine max (Soybean) PE=4 SV=1	S	Function unknown	PREDICTED: uncharacterized protein LOC101206114 [Cucumis sativus]
Csa6G188090	--	--	Cellular Component: mitochondrion (GO:0005739);; Cellular Component: chloroplast (GO:0009507);;	--	--	--	--	--	Putative uncharacterized protein GN=RCOM_0731370 OS=Ricinus communis (Castor bean) PE=4 SV=1	S	Function unknown	PREDICTED: uncharacterized protein LOC101207989 [Cucumis sativus]
Csa7G036440	--	--	--	--	--	--	--	--	Uncharacterized protein GN=PRUPE_ppb019654mg OS=Prunus persica (Peach) PE=4 SV=1	--	--	PREDICTED: polygalacturonase-like [Cucumis sativus]
Csa1G423290	[G]	Carbohydrate transport and metabolism	Molecular Function: aldose 1-epimerase activity (GO:0004034);; Cellular Component: cytosol (GO:0005829);; Cellular Component: plasma membrane (GO:0005886);; Biological Process: galactose metabolic process (GO:0006012);; Cellular Component: plant-type cell wall (GO:0009505);; Biological Process: response to abscisic acid (GO:0009737);; Biological Process: glucosinolate biosynthetic process (GO:001…	K01792|0|csv:101225230|putative glucose-6-phosphate 1-epimerase-like; K01792 glucose-6-phosphate 1-epimerase [EC:5.1.3.15] (A)	Glycolysis / Gluconeogenesis (ko00010)	[G]	Carbohydrate transport and metabolism	Aldose 1-epimerase	Putative uncharacterized protein GN=VIT_11s0052g00660 OS=Vitis vinifera (Grape) PE=4 SV=1	G	Carbohydrate transport and metabolism	PREDICTED: putative glucose-6-phosphate 1-epimerase-like [Cucumis sativus]
Csa7G387710	--	--	Cellular Component: plasmodesma (GO:0009506);; Biological Process: pollen development (GO:0009555);; Molecular Function: oxidoreductase activity (GO:0016491);;	--	--	--	--	--	Putative uncharacterized protein GN=VIT_07s0151g00300 OS=Vitis vinifera (Grape) PE=4 SV=1	S	Function unknown	PREDICTED: uncharacterized protein LOC101222496 [Cucumis sativus]
Cucumber_newGene_176	--	--	--	K14950|1.18652e-09|csv:101223595|probable cation-transporting ATPase-like; K14950 cation-transporting ATPase 13A1 [EC:3.6.3.-] (A)	--	--	--	--	--	--	--	PREDICTED: probable cation-transporting ATPase-like [Cucumis sativus]
Csa3G154380	[T]	Signal transduction mechanisms	--	--	--	--	--	Universal stress protein family	Uncharacterized protein OS=Musa acuminata subsp. malaccensis (Wild banana) PE=4 SV=1	S	Function unknown	PREDICTED: universal stress protein MJ0531-like [Cucumis sativus]
Csa1G561400	--	--	Biological Process: mRNA modification (GO:0016556);;	--	--	[R]	General function prediction only	PPR repeat;; PPR repeat family;; Pentatricopeptide repeat domain;; PPR repeat;; DYW family of nucleic acid deaminases;; Tetratricopeptide repeat;; Tetratricopeptide repeat	Predicted protein GN=POPTRDRAFT_581687 OS=Populus trichocarpa (Western balsam poplar) PE=4 SV=1	R	General function prediction only	PREDICTED: pentatricopeptide repeat-containing protein At5g48910-like [Cucumis sativus]
Csa7G212680	--	--	--	--	--	[S]	Function unknown	--	Esophageal cancer associated protein, putative GN=RCOM_0752350 OS=Ricinus communis (Castor bean) PE=4 SV=1	S	Function unknown	PREDICTED: UPF0505 protein C16orf62 homolog [Cucumis sativus]
Csa1G471470	--	--	Biological Process: maltose metabolic process (GO:0000023);; Molecular Function: nucleotide binding (GO:0000166);; Cellular Component: mitochondrion (GO:0005739);; Biological Process: tricarboxylic acid cycle (GO:0006099);; Biological Process: malate metabolic process (GO:0006108);; Biological Process: rRNA processing (GO:0006364);; Cellular Component: chloroplast stroma (GO:0009570);; Cellular C…	K00051|5.76377e-18|pvu:PHAVU_007G140600g|hypothetical protein; K00051 malate dehydrogenase (NADP+) [EC:1.1.1.82] (A)	Pyruvate metabolism (ko00620);; Carbon fixation in photosynthetic organisms (ko00710);; Carbon metabolism (ko01200)	[C]	Energy production and conversion	--	Uncharacterized protein OS=Glycine max (Soybean) PE=3 SV=1	C	Energy production and conversion	PREDICTED: malate dehydrogenase [NADP], chloroplastic-like [Glycine max]
Csa6G051530	--	--	--	--	--	--	--	--	Putative uncharacterized protein Sb02g004436 (Fragment) GN=Sb02g004436 OS=Sorghum bicolor (Sorghum) PE=4 SV=1	--	--	hypothetical protein SORBIDRAFT_02g004436 [Sorghum bicolor]
Csa3G113900	--	--	--	--	--	--	--	TNP1/EN/SPM transposase;; Plant transposase (Ptta/En/Spm family)	Putative TNP1-like transposon protein GN=At2g10000 OS=Arabidopsis thaliana (Mouse-ear cress) PE=4 SV=1	S	Function unknown	PREDICTED: uncharacterized protein LOC101217008 [Cucumis sativus]
Csa6G490240	[RTKL]	General function prediction only;; Signal transduction mechanisms;; Transcription;; Replication, recombination and repair	Molecular Function: actin binding (GO:0003779);; Molecular Function: protein serine/threonine kinase activity (GO:0004674);; Molecular Function: protein tyrosine kinase activity (GO:0004713);; Molecular Function: calcium-dependent protein serine/threonine phosphatase activity (GO:0004723);; Molecular Function: calcium ion binding (GO:0005509);; Molecular Function: ATP binding (GO:0005524);; Cellu…	--	--	[T]	Signal transduction mechanisms	Protein kinase domain;; Protein tyrosine kinase;; Kinase-like;; Phosphotransferase enzyme family	Uncharacterized protein GN=PRUPE_ppa003111mg OS=Prunus persica (Peach) PE=4 SV=1	T	Signal transduction mechanisms	PREDICTED: CDPK-related protein kinase-like [Cucumis sativus]
Csa4G083690	[J]	Translation, ribosomal structure and biogenesis	Molecular Function: ATP binding (GO:0005524);; Cellular Component: nucleus (GO:0005634);; Biological Process: purine nucleotide biosynthetic process (GO:0006164);; Biological Process: tRNA processing (GO:0008033);; Biological Process: cytokinin biosynthetic process (GO:0009691);; Molecular Function: kinase activity (GO:0016301);; Biological Process: phosphorylation (GO:0016310);; Molecular Functi…	K00791|0|csv:101231446|tRNA dimethylallyltransferase 9-like; K00791 tRNA dimethylallyltransferase [EC:2.5.1.75] (A)	Zeatin biosynthesis (ko00908)	[J]	Translation, ribosomal structure and biogenesis	IPP transferase;; AAA domain;; Isopentenyl transferase	Uncharacterized protein GN=PRUPE_ppa005482mg OS=Prunus persica (Peach) PE=4 SV=1	J	Translation, ribosomal structure and biogenesis	PREDICTED: tRNA dimethylallyltransferase 9-like [Cucumis sativus]
Csa2G425790	[RTKL]	General function prediction only;; Signal transduction mechanisms;; Transcription;; Replication, recombination and repair	Molecular Function: kinase activity (GO:0016301);;	K04730|0|csv:101203923|probable receptor-like protein kinase At2g23200-like; K04730 interleukin-1 receptor-associated kinase 1 [EC:2.7.11.1] (A)	--	[T]	Signal transduction mechanisms	Protein kinase domain;; Protein tyrosine kinase;; Carbohydrate-binding protein of the ER;; Di-glucose binding within endoplasmic reticulum	Putative uncharacterized protein GN=VIT_07s0129g00960 OS=Vitis vinifera (Grape) PE=2 SV=1	T	Signal transduction mechanisms	PREDICTED: probable receptor-like protein kinase At2g23200-like [Cucumis sativus]
Cucumber_newGene_377	[I]	Lipid transport and metabolism	--	K01613|3.07e-70|cmo:103495456|phosphatidylserine decarboxylase proenzyme 3-like; K01613 phosphatidylserine decarboxylase [EC:4.1.1.65] (A)	Glycerophospholipid metabolism (ko00564)	[I]	Lipid transport and metabolism	--	Phosphatidylserine decarboxylase 3 alpha chain GN=PSD3 OS=Arabidopsis thaliana (Mouse-ear cress) PE=1 SV=1	I	Lipid transport and metabolism	PREDICTED: phosphatidylserine decarboxylase proenzyme 3-like [Cucumis melo]
Csa2G287170	--	--	Molecular Function: transferase activity, transferring phosphorus-containing groups (GO:0016772);;	--	--	--	--	--	Predicted protein GN=POPTRDRAFT_563067 OS=Populus trichocarpa (Western balsam poplar) PE=4 SV=1	R	General function prediction only	PREDICTED: uncharacterized protein LOC101207606 [Cucumis sativus]
Csa2G009590	--	--	--	--	--	--	--	Domain of unknown function (DUF296)	Uncharacterized protein GN=PRUPE_ppa007786mg OS=Prunus persica (Peach) PE=4 SV=1	R	General function prediction only	PREDICTED: uncharacterized protein LOC101221844 [Cucumis sativus]
Csa3G126770	--	--	Molecular Function: enzyme inhibitor activity (GO:0004857);; Cellular Component: vacuolar membrane (GO:0005774);; Cellular Component: plasma membrane (GO:0005886);; Molecular Function: pectinesterase activity (GO:0030599);; Biological Process: negative regulation of catalytic activity (GO:0043086);;	--	--	--	--	Plant protein of unknown function (DUF641)	Predicted protein GN=POPTRDRAFT_644317 OS=Populus trichocarpa (Western balsam poplar) PE=4 SV=1	S	Function unknown	PREDICTED: uncharacterized protein LOC101216772 isoform 1 [Cucumis sativus]
Csa7G333400	--	--	Molecular Function: protein binding (GO:0005515);; Biological Process: post-embryonic development (GO:0009791);; Biological Process: heterocycle biosynthetic process (GO:0018130);; Biological Process: aromatic compound biosynthetic process (GO:0019438);; Biological Process: cellular nitrogen compound biosynthetic process (GO:0044271);; Biological Process: regulation of cellular process (GO:005079…	--	--	--	--	Helix-loop-helix DNA-binding domain	Uncharacterized protein GN=PRUPE_ppa004070mg OS=Prunus persica (Peach) PE=4 SV=1	K	Transcription	PREDICTED: transcription factor PIF1-like [Cucumis sativus]
Csa3G782810	--	--	--	--	--	[R]	General function prediction only	PPR repeat family;; PPR repeat;; PPR repeat;; Pentatricopeptide repeat domain;; Anaphase-promoting complex, cyclosome, subunit 3;; Tetratricopeptide repeat;; Replication factor C C-terminal domain	Uncharacterized protein GN=PRUPE_ppa002033mg OS=Prunus persica (Peach) PE=4 SV=1	R	General function prediction only	PREDICTED: pentatricopeptide repeat-containing protein At1g63330-like [Cucumis sativus]
Csa2G097440	--	--	Molecular Function: translation initiation factor activity (GO:0003743);; Cellular Component: nucleus (GO:0005634);; Cellular Component: cytosol (GO:0005829);; Biological Process: glucose catabolic process (GO:0006007);; Biological Process: regulation of translational initiation (GO:0006446);; Cellular Component: membrane (GO:0016020);; Biological Process: RNA metabolic process (GO:0016070);;	--	--	[J]	Translation, ribosomal structure and biogenesis	eIF4-gamma/eIF5/eIF2-epsilon	Predicted protein GN=POPTRDRAFT_814617 OS=Populus trichocarpa (Western balsam poplar) PE=2 SV=1	J	Translation, ribosomal structure and biogenesis	PREDICTED: basic leucine zipper and W2 domain-containing protein 2-like [Cucumis sativus]
Csa7G448020	--	--	Molecular Function: 1-phosphatidylinositol-3-phosphate 5-kinase activity (GO:0000285);; Cellular Component: mitochondrion (GO:0005739);; Cellular Component: endosome (GO:0005768);; Biological Process: vacuole organization (GO:0007033);; Biological Process: signal transduction (GO:0007165);; Molecular Function: zinc ion binding (GO:0008270);; Biological Process: pollen development (GO:0009555);; B…	K00921|0|csv:101211666|1-phosphatidylinositol 3-phosphate 5-kinase fab1-like; K00921 1-phosphatidylinositol-3-phosphate 5-kinase [EC:2.7.1.150] (A)	Inositol phosphate metabolism (ko00562);; Phosphatidylinositol signaling system (ko04070);; Phagosome (ko04145)	[T]	Signal transduction mechanisms	Phosphatidylinositol-4-phosphate 5-Kinase;; TCP-1/cpn60 chaperonin family;; FYVE zinc finger	Uncharacterized protein GN=PRUPE_ppa000102mg OS=Prunus persica (Peach) PE=4 SV=1	T	Signal transduction mechanisms	PREDICTED: 1-phosphatidylinositol 3-phosphate 5-kinase fab1-like [Cucumis sativus]
Csa1G470290	--	--	Cellular Component: chloroplast (GO:0009507);; Biological Process: phloem or xylem histogenesis (GO:0010087);; Biological Process: leaf vascular tissue pattern formation (GO:0010305);; Biological Process: cotyledon vascular tissue pattern formation (GO:0010588);; Biological Process: leaf development (GO:0048366);;	--	--	[R]	General function prediction only	PPR repeat;; PPR repeat family;; Pentatricopeptide repeat domain;; PPR repeat;; DYW family of nucleic acid deaminases	Putative uncharacterized protein GN=VIT_10s0003g01540 OS=Vitis vinifera (Grape) PE=4 SV=1	R	General function prediction only	PREDICTED: pentatricopeptide repeat-containing protein At4g18750, chloroplastic-like [Cucumis sativus]
Csa7G395790	[R]	General function prediction only	Molecular Function: protein binding (GO:0005515);; Cellular Component: nucleus (GO:0005634);; Cellular Component: cytosol (GO:0005829);; Biological Process: fatty acid beta-oxidation (GO:0006635);; Biological Process: autophagy (GO:0006914);; Biological Process: response to oxidative stress (GO:0006979);; Biological Process: response to water deprivation (GO:0009414);; Biological Process: respons…	--	--	[S]	Function unknown	WD domain, G-beta repeat	Putative uncharacterized protein GN=VIT_07s0104g01780 OS=Vitis vinifera (Grape) PE=4 SV=1	R	General function prediction only	PREDICTED: WD repeat domain phosphoinositide-interacting protein 3-like [Cucumis sativus]
Csa3G823070	[T]	Signal transduction mechanisms	Molecular Function: protein serine/threonine phosphatase activity (GO:0004722);; Cellular Component: mitochondrion (GO:0005739);;	--	--	[TR]	Signal transduction mechanisms;; General function prediction only	Calcineurin-like phosphoesterase	Calcineurin-like phosphoesterase OS=Cucumis sativus (Cucumber) PE=4 SV=1	T	Signal transduction mechanisms	PREDICTED: uncharacterized protein LOC101207810 [Cucumis sativus]
Csa3G205310	--	--	Biological Process: protein glycosylation (GO:0006486);; Biological Process: protein N-linked glycosylation (GO:0006487);; Cellular Component: integral component of membrane (GO:0016021);; Molecular Function: glycoprotein 3-alpha-L-fucosyltransferase activity (GO:0018392);; Cellular Component: Golgi cisterna membrane (GO:0032580);; Biological Process: fucosylation (GO:0036065);;	K00753|0|csv:101202837|glycoprotein 3-alpha-L-fucosyltransferase A-like; K00753 glycoprotein 3-alpha-L-fucosyltransferase [EC:2.4.1.214] (A)	--	[GE]	Carbohydrate transport and metabolism;; Amino acid transport and metabolism	Glycosyltransferase family 10 (fucosyltransferase)	Uncharacterized protein OS=Glycine max (Soybean) PE=3 SV=1	EG	Amino acid transport and metabolism;; Carbohydrate transport and metabolism	PREDICTED: glycoprotein 3-alpha-L-fucosyltransferase A-like [Cucumis sativus]
Csa7G398730	--	--	--	K01213|1.17349e-17|csv:101221903|exopolygalacturonase clone GBGE184-like; K01213 galacturan 1,4-alpha-galacturonidase [EC:3.2.1.67] (A)	Pentose and glucuronate interconversions (ko00040);; Starch and sucrose metabolism (ko00500)	--	--	--	--	--	--	PREDICTED: exopolygalacturonase clone GBGE184-like [Cucumis sativus]
Cucumber_newGene_915	--	--	--	--	--	--	--	--	--	S	Function unknown	hypothetical protein Csa_4G338930 [Cucumis sativus]
Csa3G132560	[L]	Replication, recombination and repair	Molecular Function: nucleotide binding (GO:0000166);; Molecular Function: ATP binding (GO:0005524);; Cellular Component: nucleus (GO:0005634);; Cellular Component: replication fork (GO:0005657);; Biological Process: DNA-dependent DNA replication (GO:0006261);; Biological Process: sister chromatid cohesion (GO:0007062);; Biological Process: cellular process (GO:0009987);; Molecular Function: ATPas…	K11269|0|csv:101205243|chromosome transmission fidelity protein 18 homolog; K11269 chromosome transmission fidelity protein 18 (A)	--	[DL]	Cell cycle control, cell division, chromosome partitioning;; Replication, recombination and repair	ATPase family associated with various cellular activities (AAA);; Rad17 cell cycle checkpoint protein;; AAA domain;; Holliday junction DNA helicase ruvB N-terminus;; AAA domain (dynein-related subfamily)	Chromosome transmission fidelity protein 18 GN=CTF18 OS=Arabidopsis thaliana (Mouse-ear cress) PE=4 SV=1	O	Posttranslational modification, protein turnover, chaperones	PREDICTED: chromosome transmission fidelity protein 18 homolog [Cucumis sativus]
Csa4G595980	--	--	Cellular Component: nucleus (GO:0005634);; Molecular Function: zinc ion binding (GO:0008270);; Biological Process: pollen tube growth (GO:0009860);; Molecular Function: oxidoreductase activity (GO:0016491);; Molecular Function: transferase activity (GO:0016740);;	--	--	[R]	General function prediction only	DHHC palmitoyltransferase	Uncharacterized protein GN=PRUPE_ppa006532mg OS=Prunus persica (Peach) PE=4 SV=1	R	General function prediction only	PREDICTED: probable S-acyltransferase At5g05070-like [Cucumis sativus]
Csa3G177920	[E]	Amino acid transport and metabolism	Molecular Function: L-aspartate:2-oxoglutarate aminotransferase activity (GO:0004069);; Cellular Component: cytoplasm (GO:0005737);; Molecular Function: aromatic-amino-acid:2-oxoglutarate aminotransferase activity (GO:0008793);; Biological Process: ethylene biosynthetic process (GO:0009693);; Molecular Function: 1-aminocyclopropane-1-carboxylate synthase activity (GO:0016847);; Molecular Function…	K14270|0|csv:101216259|probable aminotransferase ACS12-like; K14270 aminotransferase (A)	--	[T]	Signal transduction mechanisms	Aminotransferase class I and II	Uncharacterized protein GN=PRUPE_ppa004475mg OS=Prunus persica (Peach) PE=4 SV=1	T	Signal transduction mechanisms	PREDICTED: probable aminotransferase ACS12-like [Cucumis sativus]
Csa7G284430	[C]	Energy production and conversion	Molecular Function: dihydrolipoyllysine-residue acetyltransferase activity (GO:0004742);; Cellular Component: mitochondrion (GO:0005739);; Cellular Component: plasma membrane (GO:0005886);; Biological Process: acetyl-CoA metabolic process (GO:0006084);; Biological Process: embryo development ending in seed dormancy (GO:0009793);; Cellular Component: chloroplast envelope (GO:0009941);; Biological …	K00627|0|csv:101215151|dihydrolipoyllysine-residue acetyltransferase component of pyruvate dehydrogenase complex-like; K00627 pyruvate dehydrogenase E2 component (dihydrolipoamide acetyltransferase) [EC:2.3.1.12] (A)	Glycolysis / Gluconeogenesis (ko00010);; Citrate cycle (TCA cycle) (ko00020);; Pyruvate metabolism (ko00620);; Carbon metabolism (ko01200)	[C]	Energy production and conversion	2-oxoacid dehydrogenases acyltransferase (catalytic domain);; Biotin-requiring enzyme;; e3 binding domain	Uncharacterized protein GN=PRUPE_ppa005312mg OS=Prunus persica (Peach) PE=4 SV=1	C	Energy production and conversion	PREDICTED: dihydrolipoyllysine-residue acetyltransferase component of pyruvate dehydrogenase complex-like [Cucumis sativus]
Csa1G025250	[Z]	Cytoskeleton	Molecular Function: nucleotide binding (GO:0000166);; Biological Process: microtubule cytoskeleton organization (GO:0000226);; Biological Process: mitotic cell cycle (GO:0000278);; Biological Process: cytokinesis by cell plate formation (GO:0000911);; Cellular Component: microtubule associated complex (GO:0005875);; Biological Process: chromatin silencing (GO:0006342);; Biological Process: methyl…	K10400|0|csv:101212777|uncharacterized LOC101212777; K10400 kinesin family member 15 (A)	--	[Z]	Cytoskeleton	Kinesin motor domain;; Kinesin motor	Kinesin, putative GN=RCOM_0395650 OS=Ricinus communis (Castor bean) PE=3 SV=1	Z	Cytoskeleton	PREDICTED: uncharacterized protein LOC101212777 [Cucumis sativus]
Csa3G270810	--	--	--	--	--	--	--	--	Putative uncharacterized protein GN=VITISV_025604 OS=Vitis vinifera (Grape) PE=4 SV=1	S	Function unknown	PREDICTED: uncharacterized protein LOC101213947 [Cucumis sativus]
Csa3G901080	[V]	Defense mechanisms	Molecular Function: ATP binding (GO:0005524);; Cellular Component: mitochondrion (GO:0005739);; Cellular Component: plasma membrane (GO:0005886);; Biological Process: ATP catabolic process (GO:0006200);; Cellular Component: chloroplast (GO:0009507);; Biological Process: vernalization response (GO:0010048);; Biological Process: auxin efflux (GO:0010315);; Molecular Function: auxin efflux transmemb…	K05658|0|cmo:103503564|ABC transporter B family member 2-like; K05658 ATP-binding cassette, subfamily B (MDR/TAP), member 1 [EC:3.6.3.44] (A)	ABC transporters (ko02010)	[Q]	Secondary metabolites biosynthesis, transport and catabolism	ABC transporter transmembrane region;; ABC transporter;; RecF/RecN/SMC N terminal domain;; Predicted ATPase of the ABC class;; P-loop containing region of AAA domain;; AAA domain;; Zeta toxin;; Protein of unknown function, DUF258	Uncharacterized protein GN=PRUPE_ppa000340mg OS=Prunus persica (Peach) PE=4 SV=1	Q	Secondary metabolites biosynthesis, transport and catabolism	PREDICTED: ABC transporter B family member 2-like [Cucumis sativus]
Csa4G675260	[J]	Translation, ribosomal structure and biogenesis	Molecular Function: translation initiation factor activity (GO:0003743);; Molecular Function: GTPase activity (GO:0003924);; Molecular Function: GTP binding (GO:0005525);; Biological Process: GTP catabolic process (GO:0006184);; Biological Process: translational initiation (GO:0006413);; Cellular Component: chloroplast stroma (GO:0009570);; Biological Process: chloroplast relocation (GO:0009902);…	K02519|0|csv:101216442|translation initiation factor IF-2, chloroplastic-like; K02519 translation initiation factor IF-2 (A)	--	[J]	Translation, ribosomal structure and biogenesis	Elongation factor Tu GTP binding domain;; Translation-initiation factor 2;; Elongation factor Tu domain 2;; 50S ribosome-binding GTPase;; Translation initiation factor IF-2, N-terminal region	Uncharacterized protein GN=PRUPE_ppa000701mg OS=Prunus persica (Peach) PE=4 SV=1	J	Translation, ribosomal structure and biogenesis	PREDICTED: translation initiation factor IF-2, chloroplastic-like [Cucumis sativus]
Csa2G058110	[IR]	Lipid transport and metabolism;; General function prediction only	Molecular Function: diacylglycerol kinase activity (GO:0004143);; Cellular Component: nucleus (GO:0005634);; Cellular Component: plasma membrane (GO:0005886);; Biological Process: protein kinase C-activating G-protein coupled receptor signaling pathway (GO:0007205);; Biological Process: phosphorylation (GO:0016310);; Biological Process: regulation of defense response (GO:0031347);; Biological Pro…	K00901|0|csv:101217776|diacylglycerol kinase theta-like; K00901 diacylglycerol kinase (ATP) [EC:2.7.1.107] (A)	Glycerolipid metabolism (ko00561);; Glycerophospholipid metabolism (ko00564);; Phosphatidylinositol signaling system (ko04070)	[IT]	Lipid transport and metabolism;; Signal transduction mechanisms	Diacylglycerol kinase accessory domain;; Diacylglycerol kinase catalytic domain	Uncharacterized protein GN=PRUPE_ppa004883mg OS=Prunus persica (Peach) PE=4 SV=1	T	Signal transduction mechanisms	PREDICTED: diacylglycerol kinase theta-like [Cucumis sativus]
Csa1G042230	[J]	Translation, ribosomal structure and biogenesis	Molecular Function: aminoacyl-tRNA hydrolase activity (GO:0004045);; Cellular Component: mitochondrion (GO:0005739);; Biological Process: translation (GO:0006412);; Biological Process: heme biosynthetic process (GO:0006783);; Cellular Component: chloroplast (GO:0009507);;	K01056|9.60304e-162|csv:101211885|peptidyl-tRNA hydrolase, chloroplastic-like; K01056 peptidyl-tRNA hydrolase, PTH1 family [EC:3.1.1.29] (A)	--	[J]	Translation, ribosomal structure and biogenesis	Peptidyl-tRNA hydrolase	Uncharacterized protein GN=PRUPE_ppa010131mg OS=Prunus persica (Peach) PE=4 SV=1	J	Translation, ribosomal structure and biogenesis	PREDICTED: peptidyl-tRNA hydrolase, chloroplastic-like [Cucumis sativus]
Csa4G410860	--	--	--	--	--	--	--	--	--	--	--	PREDICTED: probable receptor-like protein kinase At5g39030-like [Cucumis sativus]
Csa3G165670	--	--	--	--	--	--	--	--	Putative uncharacterized protein GN=MTR_2g034870 OS=Medicago truncatula (Barrel medic) PE=4 SV=1	--	--	hypothetical protein MTR_2g034870 [Medicago truncatula]
Csa3G734130	[R]	General function prediction only	Cellular Component: extracellular region (GO:0005576);; Molecular Function: zinc ion binding (GO:0008270);; Cellular Component: membrane (GO:0016020);; Cellular Component: cytoplasmic membrane-bounded vesicle (GO:0016023);; Molecular Function: 2-alkenal reductase [NAD(P)] activity (GO:0032440);; Biological Process: oxidation-reduction process (GO:0055114);;	K18932|0|csv:101225286|probable S-acyltransferase At3g09320-like; K18932 palmitoyltransferase [EC:2.3.1.225] (A)	--	[R]	General function prediction only	DHHC palmitoyltransferase	Zinc finger protein, putative GN=RCOM_0452130 OS=Ricinus communis (Castor bean) PE=4 SV=1	R	General function prediction only	PREDICTED: probable S-acyltransferase At3g09320-like [Cucumis sativus]
Csa6G429100	[E]	Amino acid transport and metabolism	Molecular Function: hydroxymethylglutaryl-CoA lyase activity (GO:0004419);; Cellular Component: mitochondrion (GO:0005739);; Biological Process: leucine metabolic process (GO:0006551);;	K01640|0|cmo:103491459|hydroxymethylglutaryl-CoA lyase, mitochondrial; K01640 hydroxymethylglutaryl-CoA lyase [EC:4.1.3.4] (A)	Synthesis and degradation of ketone bodies (ko00072);; Valine, leucine and isoleucine degradation (ko00280);; Butanoate metabolism (ko00650);; Peroxisome (ko04146)	[CE]	Energy production and conversion;; Amino acid transport and metabolism	HMGL-like	Predicted protein GN=POPTRDRAFT_833174 OS=Populus trichocarpa (Western balsam poplar) PE=4 SV=1	CE	Energy production and conversion;; Amino acid transport and metabolism	PREDICTED: hydroxymethylglutaryl-CoA lyase, mitochondrial-like [Cucumis sativus]
Csa3G481250	--	--	--	--	--	--	--	--	Putative uncharacterized protein GN=RCOM_1495360 OS=Ricinus communis (Castor bean) PE=4 SV=1	S	Function unknown	PREDICTED: uncharacterized protein LOC101203675 [Cucumis sativus]
Csa1G618890	--	--	Molecular Function: monooxygenase activity (GO:0004497);; Molecular Function: binding (GO:0005488);; Molecular Function: oxidoreductase activity, acting on paired donors, with incorporation or reduction of molecular oxygen (GO:0016705);;	K12153|0|csv:101225892|isoleucine N-monooxygenase 1-like; K12153 phenylalanine N-monooxygenase [EC:1.14.13.124] (A)	Cyanoamino acid metabolism (ko00460);; 2-Oxocarboxylic acid metabolism (ko01210)	[Q]	Secondary metabolites biosynthesis, transport and catabolism	Cytochrome P450	Cytochrome P450, putative GN=RCOM_1042920 OS=Ricinus communis (Castor bean) PE=4 SV=1	Q	Secondary metabolites biosynthesis, transport and catabolism	PREDICTED: isoleucine N-monooxygenase 1-like [Cucumis sativus]
Csa5G139070	--	--	--	--	--	--	--	--	Putative uncharacterized protein OS=Populus trichocarpa (Western balsam poplar) PE=2 SV=1	S	Function unknown	unknown [Populus trichocarpa]
Csa6G147660	[G]	Carbohydrate transport and metabolism	Cellular Component: cell wall (GO:0005618);; Biological Process: cellular glucan metabolic process (GO:0006073);; Molecular Function: cellulase activity (GO:0008810);; Molecular Function: xyloglucan:xyloglucosyl transferase activity (GO:0016762);; Biological Process: cell wall macromolecule catabolic process (GO:0016998);; Biological Process: cell wall biogenesis (GO:0042546);; Cellular Component…	K08235|0|csv:101220217|probable xyloglucan endotransglucosylase/hydrolase protein 31-like; K08235 xyloglucan:xyloglucosyl transferase [EC:2.4.1.207] (A)	--	--	--	Glycosyl hydrolases family 16;; Xyloglucan endo-transglycosylase (XET) C-terminus	Putative xyloglucan endotransglucosylase/hydrolase GN=xth24 OS=Cucumis sativus (Cucumber) PE=4 SV=1	G	Carbohydrate transport and metabolism	PREDICTED: probable xyloglucan endotransglucosylase/hydrolase protein 31-like [Cucumis sativus]
Csa4G107470	[J]	Translation, ribosomal structure and biogenesis	Molecular Function: DNA binding (GO:0003677);; Molecular Function: structural constituent of ribosome (GO:0003735);; Molecular Function: structural molecule activity (GO:0005198);; Cellular Component: ribosome (GO:0005840);; Biological Process: DNA-templated transcription, elongation (GO:0006354);; Biological Process: translation (GO:0006412);; Biological Process: pyrimidine ribonucleotide biosyn…	--	--	--	--	Ribosomal protein S11	Putative uncharacterized protein GN=VIT_05s0062g00880 OS=Vitis vinifera (Grape) PE=3 SV=1	J	Translation, ribosomal structure and biogenesis	PREDICTED: uncharacterized protein LOC101215182 [Cucumis sativus]
Csa2G247070	--	--	Cellular Component: mitochondrion (GO:0005739);; Biological Process: response to oxidative stress (GO:0006979);;	--	--	--	--	--	Uncharacterized protein GN=PRUPE_ppa019871mg OS=Prunus persica (Peach) PE=4 SV=1	S	Function unknown	PREDICTED: uncharacterized protein LOC101211034 [Cucumis sativus]
Csa1G652240	[E]	Amino acid transport and metabolism	Molecular Function: acetolactate synthase activity (GO:0003984);; Cellular Component: cytosol (GO:0005829);; Biological Process: gluconeogenesis (GO:0006094);; Biological Process: leucine metabolic process (GO:0006551);; Biological Process: valine metabolic process (GO:0006573);; Biological Process: cytoskeleton organization (GO:0007010);; Biological Process: branched-chain amino acid biosyntheti…	K01653|1.35275e-101|csv:101232287|uncharacterized LOC101232287; K01653 acetolactate synthase I/III small subunit [EC:2.2.1.6] (A)	Valine, leucine and isoleucine biosynthesis (ko00290);; Butanoate metabolism (ko00650);; C5-Branched dibasic acid metabolism (ko00660);; Pantothenate and CoA biosynthesis (ko00770);; 2-Oxocarboxylic acid metabolism (ko01210);; Biosynthesis of amino acids (ko01230)	[E]	Amino acid transport and metabolism	ACT domain;; ACT domain	Uncharacterized protein GN=PRUPE_ppa005063mg OS=Prunus persica (Peach) PE=4 SV=1	E	Amino acid transport and metabolism	PREDICTED: uncharacterized protein LOC101232287 [Cucumis sativus]
Csa5G571510	[P]	Inorganic ion transport and metabolism	Biological Process: metal ion transport (GO:0030001);; Molecular Function: metal ion binding (GO:0046872);;	--	--	[P]	Inorganic ion transport and metabolism	Heavy-metal-associated domain	Predicted protein GN=POPTRDRAFT_833595 OS=Populus trichocarpa (Western balsam poplar) PE=4 SV=1	P	Inorganic ion transport and metabolism	PREDICTED: heavy metal-associated isoprenylated plant protein 26-like [Cucumis sativus]
Csa2G349000	[R]	General function prediction only	Molecular Function: peroxidase activity (GO:0004601);; Cellular Component: extracellular region (GO:0005576);; Biological Process: response to oxidative stress (GO:0006979);; Molecular Function: heme binding (GO:0020037);; Molecular Function: metal ion binding (GO:0046872);; Biological Process: oxidation-reduction process (GO:0055114);;	--	--	--	--	--	Putative uncharacterized protein GN=VIT_00s0394g00030 OS=Vitis vinifera (Grape) PE=4 SV=1	S	Function unknown	PREDICTED: lipase-like [Cucumis sativus]
Csa3G006640	[L]	Replication, recombination and repair	Molecular Function: DNA binding (GO:0003677);; Molecular Function: DNA (cytosine-5-)-methyltransferase activity (GO:0003886);; Cellular Component: nucleus (GO:0005634);; Biological Process: DNA replication (GO:0006260);; Biological Process: chromatin silencing (GO:0006342);; Biological Process: histone modification (GO:0016570);; Molecular Function: transferase activity, transferring acyl groups …	K00558|0|csv:101207925|DNA (cytosine-5)-methyltransferase CMT2-like; K00558 DNA (cytosine-5)-methyltransferase 1 [EC:2.1.1.37] (A)	Cysteine and methionine metabolism (ko00270)	--	--	C-5 cytosine-specific DNA methylase;; Chromo (CHRromatin Organisation MOdifier) domain;; BAH domain	Uncharacterized protein (Fragment) GN=PRUPE_ppa019831mg OS=Prunus persica (Peach) PE=4 SV=1	B	Chromatin structure and dynamics	PREDICTED: DNA (cytosine-5)-methyltransferase CMT2-like [Cucumis sativus]
Csa6G525270	--	--	Biological Process: ubiquitin-dependent protein catabolic process (GO:0006511);;	--	--	[R]	General function prediction only	F-box-like;; F-box domain	F-box family protein GN=ARALYDRAFT_352454 OS=Arabidopsis lyrata subsp. lyrata (Lyre-leaved rock-cress) PE=4 SV=1	J	Translation, ribosomal structure and biogenesis	PREDICTED: putative F-box/LRR-repeat protein 23-like [Cucumis sativus]
Csa2G014830	[S]	Function unknown	--	--	--	[T]	Signal transduction mechanisms	NB-ARC domain;; Leucine rich repeat;; Leucine Rich repeats (2 copies);; Archaeal ATPase	Putative uncharacterized protein GN=VIT_14s0081g00800 OS=Vitis vinifera (Grape) PE=4 SV=1	R	General function prediction only	PREDICTED: disease resistance protein At4g27190-like, partial [Cucumis sativus]
Csa1G433070	[RTKL]	General function prediction only;; Signal transduction mechanisms;; Transcription;; Replication, recombination and repair	Molecular Function: protein serine/threonine kinase activity (GO:0004674);; Molecular Function: ATP binding (GO:0005524);; Biological Process: protein phosphorylation (GO:0006468);;	K04733|6.63089e-128|csv:101203677|probable LRR receptor-like serine/threonine-protein kinase At1g56140-like; K04733 interleukin-1 receptor-associated kinase 4 [EC:2.7.11.1] (A)	--	--	--	Protein tyrosine kinase;; Protein kinase domain	Serine-threonine protein kinase, plant-type, putative GN=RCOM_0583080 OS=Ricinus communis (Castor bean) PE=4 SV=1	T	Signal transduction mechanisms	PREDICTED: probable LRR receptor-like serine/threonine-protein kinase At1g56140-like, partial [Cucumis sativus]
Csa5G608090	--	--	--	--	--	--	--	Protein of unknown function (DUF1262)	Putative uncharacterized protein GN=RCOM_1464600 OS=Ricinus communis (Castor bean) PE=4 SV=1	S	Function unknown	PREDICTED: uncharacterized protein LOC101229674 [Cucumis sativus]
Csa2G381730	--	--	Molecular Function: nucleotide binding (GO:0000166);; Molecular Function: nucleic acid binding (GO:0003676);; Molecular Function: RNA-directed RNA polymerase activity (GO:0003968);; Cellular Component: nucleus (GO:0005634);; Biological Process: virus induced gene silencing (GO:0009616);; Biological Process: production of ta-siRNAs involved in RNA interference (GO:0010267);; Biological Process: ma…	K11699|0|csv:101217108|RNA-dependent RNA polymerase 6-like; K11699 RNA-dependent RNA polymerase [EC:2.7.7.48] (A)	--	[A]	RNA processing and modification	RNA dependent RNA polymerase	RNA-dependent RNA polymerase 6 OS=Cucumis sativus (Cucumber) PE=2 SV=1	A	RNA processing and modification	RNA-dependent RNA polymerase 6-like [Cucumis sativus]
Csa3G185090	--	--	--	--	--	--	--	--	Predicted protein GN=POPTRDRAFT_553036 OS=Populus trichocarpa (Western balsam poplar) PE=4 SV=1	S	Function unknown	PREDICTED: uncharacterized protein LOC101208221 [Cucumis sativus]
Csa6G401500	[R]	General function prediction only	Biological Process: methylation (GO:0032259);; Biological Process: single-organism process (GO:0044699);;	--	--	[BK]	Chromatin structure and dynamics;; Transcription	SET domain;; GYF domain	Set domain protein, putative GN=RCOM_1602600 OS=Ricinus communis (Castor bean) PE=4 SV=1	BK	Chromatin structure and dynamics;; Transcription	PREDICTED: uncharacterized protein LOC101220062 [Cucumis sativus]
Csa6G495660	--	--	Molecular Function: DNA binding (GO:0003677);; Molecular Function: sequence-specific DNA binding transcription factor activity (GO:0003700);; Cellular Component: nucleus (GO:0005634);; Biological Process: regulation of transcription, DNA-templated (GO:0006355);; Biological Process: heat acclimation (GO:0010286);;	--	--	[O]	Posttranslational modification, protein turnover, chaperones	Myb-like DNA-binding domain;; Myb-like DNA-binding domain	Putative uncharacterized protein GN=VIT_06s0080g00790 OS=Vitis vinifera (Grape) PE=4 SV=1	K	Transcription	PREDICTED: transcription factor DIVARICATA-like [Cucumis sativus]
Csa5G208460	--	--	Cellular Component: plasma membrane (GO:0005886);; Molecular Function: organic cyclic compound binding (GO:0097159);; Molecular Function: heterocyclic compound binding (GO:1901363);;	K08518|0|csv:101208658|uncharacterized LOC101208658; K08518 syntaxin-binding protein 5 (A)	--	[U]	Intracellular trafficking, secretion, and vesicular transport	WD domain, G-beta repeat;; Synaptobrevin	Uncharacterized protein GN=PRUPE_ppa000521mg OS=Prunus persica (Peach) PE=4 SV=1	U	Intracellular trafficking, secretion, and vesicular transport	PREDICTED: uncharacterized protein LOC101208658 [Cucumis sativus]
Csa3G122660	--	--	Biological Process: cellular biosynthetic process (GO:0044249);; Biological Process: organic substance biosynthetic process (GO:1901576);;	--	--	--	--	--	Uncharacterized protein GN=PRUPE_ppa020590mg OS=Prunus persica (Peach) PE=4 SV=1	R	General function prediction only	PREDICTED: BON1-associated protein 2-like [Cucumis sativus]
Csa4G165880	--	--	--	--	--	--	--	--	Exosome complex exonuclease RRP43 GN=MTR_1g007060 OS=Medicago truncatula (Barrel medic) PE=4 SV=1	--	--	PREDICTED: exosome complex component RRP43-like [Cucumis sativus]
Csa3G171760	[Q]	Secondary metabolites biosynthesis, transport and catabolism	Cellular Component: peroxisome (GO:0005777);; Cellular Component: chloroplast (GO:0009507);; Biological Process: phylloquinone biosynthetic process (GO:0042372);; Molecular Function: acyl-CoA hydrolase activity (GO:0047617);;	--	--	[R]	General function prediction only	Thioesterase superfamily	Uncharacterized protein GN=Bra014127 OS=Brassica rapa subsp. pekinensis (Chinese cabbage) PE=4 SV=1	R	General function prediction only	PREDICTED: putative esterase HI_1161-like [Cucumis sativus]
Csa6G138110	[DKL]	Cell cycle control, cell division, chromosome partitioning;; Transcription;; Replication, recombination and repair	Biological Process: transcription, DNA-templated (GO:0006351);; Biological Process: cellular protein modification process (GO:0006464);; Biological Process: regulation of cellular metabolic process (GO:0031323);; Biological Process: cellular macromolecule metabolic process (GO:0044260);; Biological Process: single-organism developmental process (GO:0044767);; Biological Process: system developmen…	K15188|0|csv:101220862|cyclin-T1-5-like; K15188 cyclin T (A)	--	[D]	Cell cycle control, cell division, chromosome partitioning	Cyclin, N-terminal domain;; Cyclin, C-terminal domain	Putative uncharacterized protein GN=VIT_19s0027g01670 OS=Vitis vinifera (Grape) PE=3 SV=1	DKL	Cell cycle control, cell division, chromosome partitioning;; Transcription;; Replication, recombination and repair	PREDICTED: cyclin-T1-5-like [Cucumis sativus]
Csa4G645290	[HC]	Coenzyme transport and metabolism;; Energy production and conversion	Molecular Function: squalene monooxygenase activity (GO:0004506);; Biological Process: response to water deprivation (GO:0009414);; Cellular Component: integral component of membrane (GO:0016021);; Molecular Function: flavin adenine dinucleotide binding (GO:0050660);; Biological Process: oxidation-reduction process (GO:0055114);;	K00511|0|csv:101204949|squalene monooxygenase-like; K00511 squalene monooxygenase [EC:1.14.13.132] (A)	Steroid biosynthesis (ko00100);; Sesquiterpenoid and triterpenoid biosynthesis (ko00909)	[I]	Lipid transport and metabolism	Squalene epoxidase;; FAD binding domain;; FAD dependent oxidoreductase;; FAD binding domain;; Glucose inhibited division protein A;; NAD(P)-binding Rossmann-like domain;; Thi4 family	Squalene epoxidase OS=Gynostemma pentaphyllum (Jiaogulan) PE=2 SV=1	I	Lipid transport and metabolism	PREDICTED: squalene monooxygenase-like [Cucumis sativus]
Csa4G012420	--	--	Cellular Component: cytoplasmic membrane-bounded vesicle (GO:0016023);;	--	--	--	--	Protein of unknown function (DUF3339)	Uncharacterized protein OS=Musa acuminata subsp. malaccensis (Wild banana) PE=4 SV=1	S	Function unknown	PREDICTED: uncharacterized protein LOC101215007 [Cucumis sativus]
Csa6G507520	[R]	General function prediction only	Molecular Function: chitinase activity (GO:0004568);; Cellular Component: vacuole (GO:0005773);; Cellular Component: plasma membrane (GO:0005886);; Biological Process: carbohydrate metabolic process (GO:0005975);; Biological Process: chitin catabolic process (GO:0006032);; Molecular Function: chitin binding (GO:0008061);; Molecular Function: endochitinase activity (GO:0008843);; Biological Proces…	K01183|0|csv:101215573|basic endochitinase A-like; K01183 chitinase [EC:3.2.1.14] (A)	Amino sugar and nucleotide sugar metabolism (ko00520)	[R]	General function prediction only	Chitinase class I;; Chitin recognition protein	Endochitinase MCHT-2 GN=mcht-2 OS=Cucumis melo (Muskmelon) PE=2 SV=2	G	Carbohydrate transport and metabolism	PREDICTED: basic endochitinase A-like [Cucumis sativus]
Csa1G042240	[R]	General function prediction only	Biological Process: microtubule cytoskeleton organization (GO:0000226);; Cellular Component: nucleus (GO:0005634);; Biological Process: multidimensional cell growth (GO:0009825);; Biological Process: guard cell differentiation (GO:0010052);; Biological Process: guard mother cell cytokinesis (GO:0010235);; Molecular Function: myosin heavy chain kinase activity (GO:0016905);; Cellular Component: Cu…	--	--	[T]	Signal transduction mechanisms	DENN (AEX-3) domain;; WD domain, G-beta repeat;; dDENN domain;; uDENN domain	Putative uncharacterized protein GN=VIT_17s0000g03950 OS=Vitis vinifera (Grape) PE=2 SV=1	T	Signal transduction mechanisms	PREDICTED: uncharacterized protein LOC101212131 [Cucumis sativus]
Csa3G814390	[S]	Function unknown	--	--	--	[T]	Signal transduction mechanisms	NB-ARC domain;; Leucine Rich repeats (2 copies);; Leucine rich repeat	Uncharacterized protein GN=PRUPE_ppa018734mg OS=Prunus persica (Peach) PE=4 SV=1	T	Signal transduction mechanisms	PREDICTED: putative disease resistance protein RGA4-like [Cucumis sativus]
Csa3G608690	--	--	Molecular Function: binding (GO:0005488);;	--	--	--	--	MYB-CC type transfactor, LHEQLE motif;; Myb-like DNA-binding domain	Uncharacterized protein GN=PRUPE_ppa004886mg OS=Prunus persica (Peach) PE=4 SV=1	S	Function unknown	PREDICTED: protein PHR1-LIKE 1-like isoform 1 [Cucumis sativus]
Csa2G277020	--	--	Cellular Component: nucleus (GO:0005634);;	K13168|0|csv:101213620|uncharacterized LOC101213620; K13168 splicing factor, arginine/serine-rich 16 (A)	--	[A]	RNA processing and modification	Alternative splicing regulator	Uncharacterized protein GN=PRUPE_ppa003826mg OS=Prunus persica (Peach) PE=4 SV=1	A	RNA processing and modification	PREDICTED: uncharacterized protein LOC101213620 [Cucumis sativus]
Csa5G633290	--	--	Biological Process: response to hypoxia (GO:0001666);; Molecular Function: ATP:ADP antiporter activity (GO:0005471);; Molecular Function: ATP binding (GO:0005524);; Cellular Component: mitochondrion (GO:0005739);; Cellular Component: endoplasmic reticulum (GO:0005783);; Cellular Component: plasma membrane (GO:0005886);; Biological Process: response to abscisic acid (GO:0009737);; Biological Proce…	K08900|0|csv:101215623|mitochondrial chaperone BCS1-like; K08900 mitochondrial chaperone BCS1 (A)	--	[O]	Posttranslational modification, protein turnover, chaperones	Domain associated at C-terminal with AAA;; ATPase family associated with various cellular activities (AAA);; Holliday junction DNA helicase ruvB N-terminus	Uncharacterized protein GN=PRUPE_ppa005005mg OS=Prunus persica (Peach) PE=4 SV=1	O	Posttranslational modification, protein turnover, chaperones	PREDICTED: mitochondrial chaperone BCS1-like [Cucumis sativus]
Csa3G708180	--	--	Molecular Function: iron ion binding (GO:0005506);; Biological Process: fatty acid biosynthetic process (GO:0006633);; Cellular Component: integral component of membrane (GO:0016021);; Molecular Function: oxidoreductase activity (GO:0016491);; Biological Process: oxidation-reduction process (GO:0055114);;	K15404|1.5567e-32|csv:101222843|protein ECERIFERUM 1-like; K15404 aldehyde decarbonylase [EC:4.1.99.5] (A)	Cutin, suberine and wax biosynthesis (ko00073)	--	--	Fatty acid hydroxylase superfamily	Sterol desaturase OS=Cucumis melo subsp. melo PE=4 SV=1	I	Lipid transport and metabolism	PREDICTED: protein ECERIFERUM 1-like [Cucumis sativus]
Csa1G696470	[R]	General function prediction only	Molecular Function: GTPase activity (GO:0003924);; Molecular Function: sphingomyelin phosphodiesterase activity (GO:0004767);; Molecular Function: GTP binding (GO:0005525);; Cellular Component: extracellular region (GO:0005576);; Cellular Component: intracellular (GO:0005622);; Cellular Component: plasma membrane (GO:0005886);; Biological Process: GTP catabolic process (GO:0006184);; Biological P…	K04392|1.43658e-143|csv:101208639|rac-like GTP-binding protein ARAC7-like; K04392 Ras-related C3 botulinum toxin substrate 1 (A)	Phagosome (ko04145)	[R]	General function prediction only	Ras family;; Miro-like protein	Rac-like GTP-binding protein GN=MTR_6g087980 OS=Medicago truncatula (Barrel medic) PE=2 SV=1	R	General function prediction only	PREDICTED: rac-like GTP-binding protein ARAC7-like [Cucumis sativus]
Csa6G193580	[B]	Chromatin structure and dynamics	Cellular Component: nucleosome (GO:0000786);; Molecular Function: DNA binding (GO:0003677);; Cellular Component: nucleolus (GO:0005730);; Cellular Component: mitochondrion (GO:0005739);; Cellular Component: vacuolar membrane (GO:0005774);; Cellular Component: Golgi apparatus (GO:0005794);; Cellular Component: cytosol (GO:0005829);; Cellular Component: plasma membrane (GO:0005886);; Biological Pro…	K14838|8.9079e-51|zma:100282268|pco082380(357); LOC100282268; K11254 histone H4 (A)	--	[B]	Chromatin structure and dynamics	Core histone H2A/H2B/H3/H4;; TATA box binding protein associated factor (TAF)	Uncharacterized protein OS=Capsella rubella PE=4 SV=1	R	General function prediction only	histone H4 [Arabidopsis thaliana]
Csa1G532220	--	--	--	--	--	--	--	--	--	--	--	PREDICTED: uncharacterized protein LOC101306798 [Fragaria vesca subsp. vesca]
Csa4G119270	--	--	Biological Process: RNA splicing, via endonucleolytic cleavage and ligation (GO:0000394);; Cellular Component: endosome (GO:0005768);; Cellular Component: Golgi apparatus (GO:0005794);; Cellular Component: trans-Golgi network (GO:0005802);; Biological Process: methionine biosynthetic process (GO:0009086);; Molecular Function: transferase activity, transferring glycosyl groups (GO:0016757);;	--	--	--	--	GDP-fucose protein O-fucosyltransferase	Predicted protein GN=POPTRDRAFT_785825 OS=Populus trichocarpa (Western balsam poplar) PE=2 SV=1	S	Function unknown	PREDICTED: LOW QUALITY PROTEIN: DUF246 domain-containing protein At1g04910-like [Cucumis sativus]
Csa4G017040	--	--	Molecular Function: phospholipid binding (GO:0005543);; Cellular Component: vacuolar membrane (GO:0005774);; Cellular Component: Golgi apparatus (GO:0005794);; Cellular Component: plasma membrane (GO:0005886);; Molecular Function: clathrin binding (GO:0030276);;	K12471|0|csv:101208671|clathrin interactor EPSIN 2-like; K12471 epsin (A)	Endocytosis (ko04144)	[F]	Nucleotide transport and metabolism	ENTH domain	Uncharacterized protein GN=PRUPE_ppa000949mg OS=Prunus persica (Peach) PE=4 SV=1	F	Nucleotide transport and metabolism	PREDICTED: clathrin interactor EPSIN 2-like [Cucumis sativus]
Csa6G517400	--	--	--	--	--	--	--	Pollen proteins Ole e I like	Uncharacterized protein OS=Medicago truncatula (Barrel medic) PE=1 SV=1	R	General function prediction only	PREDICTED: uncharacterized protein LOC101204026 [Cucumis sativus]
Csa6G106800	--	--	Molecular Function: calcium ion binding (GO:0005509);; Molecular Function: protein binding (GO:0005515);; Cellular Component: nucleus (GO:0005634);; Biological Process: trichome branching (GO:0010091);; Biological Process: hydrogen peroxide catabolic process (GO:0042744);;	--	--	[ZD]	Cytoskeleton;; Cell cycle control, cell division, chromosome partitioning	EF-hand domain pair	Uncharacterized protein OS=Glycine max (Soybean) PE=2 SV=1	DZ	Cell cycle control, cell division, chromosome partitioning;; Cytoskeleton	PREDICTED: calcium-binding protein KIC-like [Cucumis sativus]
Csa5G171680	--	--	--	K09422|7.02387e-70|csv:101210191|protein ODORANT1-like; K09422 myb proto-oncogene protein, plant (A)	--	--	--	--	Transcription factor MYBL1 GN=MYBL1 OS=Populus canadensis (Canadian poplar) PE=2 SV=1	--	--	PREDICTED: protein ODORANT1-like [Cucumis sativus]
Csa5G604120	--	--	Molecular Function: endonuclease activity (GO:0004519);; Cellular Component: mitochondrion (GO:0005739);; Cellular Component: chloroplast (GO:0009507);; Biological Process: mRNA modification (GO:0016556);;	--	--	[R]	General function prediction only	PPR repeat family;; PPR repeat;; Pentatricopeptide repeat domain;; PPR repeat;; DYW family of nucleic acid deaminases	Putative uncharacterized protein GN=VIT_01s0026g01440 OS=Vitis vinifera (Grape) PE=4 SV=1	R	General function prediction only	PREDICTED: pentatricopeptide repeat-containing protein At1g59720, mitochondrial-like [Cucumis sativus]
Csa1G650120	--	--	Biological Process: metal ion transport (GO:0030001);; Molecular Function: metal ion binding (GO:0046872);;	--	--	[P]	Inorganic ion transport and metabolism	Heavy-metal-associated domain	Copper ion binding protein, putative GN=RCOM_0771550 OS=Ricinus communis (Castor bean) PE=4 SV=1	P	Inorganic ion transport and metabolism	copper ion binding protein, putative [Ricinus communis]
Csa4G062360	[J]	Translation, ribosomal structure and biogenesis	Molecular Function: structural constituent of ribosome (GO:0003735);; Biological Process: translation (GO:0006412);; Cellular Component: membrane (GO:0016020);; Cellular Component: cytosolic large ribosomal subunit (GO:0022625);;	K02901|3.74238e-66|csv:101212658|60S ribosomal protein L27-like; K02901 large subunit ribosomal protein L27e (A)	Ribosome (ko03010)	[J]	Translation, ribosomal structure and biogenesis	Ribosomal L27e protein family;; KOW motif	60S ribosomal protein L27 GN=RPL27C OS=Hevea brasiliensis (Para rubber tree) PE=2 SV=1	R	General function prediction only	PREDICTED: 60S ribosomal protein L27-like [Cucumis sativus]
Csa3G313200	--	--	--	--	--	--	--	--	Predicted protein GN=POPTRDRAFT_556060 OS=Populus trichocarpa (Western balsam poplar) PE=2 SV=1	S	Function unknown	PREDICTED: uncharacterized protein LOC101219659 isoform 2 [Cucumis sativus]
Csa5G548150	--	--	Biological Process: cell fate specification (GO:0001708);; Molecular Function: protein binding (GO:0005515);; Biological Process: multicellular organismal development (GO:0007275);; Biological Process: embryonic pattern specification (GO:0009880);; Biological Process: single-organism developmental process (GO:0044767);; Biological Process: anatomical structure development (GO:0048856);; Biologica…	--	--	--	--	Protein of unknown function (DUF1423)	Uncharacterized protein GN=PRUPE_ppa001534mg OS=Prunus persica (Peach) PE=4 SV=1	R	General function prediction only	PREDICTED: protein OBERON 3-like [Cucumis sativus]
Csa1G595800	[R]	General function prediction only	Cellular Component: nucleus (GO:0005634);; Cellular Component: vacuole (GO:0005773);; Cellular Component: endoplasmic reticulum (GO:0005783);; Cellular Component: plasma membrane (GO:0005886);; Biological Process: proteolysis (GO:0006508);; Molecular Function: serine-type peptidase activity (GO:0008236);; Biological Process: response to water (GO:0009415);; Biological Process: phototropism (GO:00…	K06889|0|csv:101205744|protein bem46-like; K06889 (A)	--	[R]	General function prediction only	Alpha/beta hydrolase family;; Alpha/beta hydrolase family;; Prolyl oligopeptidase family;; alpha/beta hydrolase fold;; Phospholipase/Carboxylesterase;; alpha/beta hydrolase fold;; BAAT / Acyl-CoA thioester hydrolase C terminal;; Dienelactone hydrolase family	Predicted protein GN=POPTRDRAFT_1105469 OS=Populus trichocarpa (Western balsam poplar) PE=2 SV=1	R	General function prediction only	PREDICTED: protein bem46-like [Cucumis sativus]
Csa5G175870	--	--	--	--	--	--	--	Protein of unknown function DUF260	Uncharacterized protein OS=Glycine max (Soybean) PE=4 SV=1	S	Function unknown	PREDICTED: LOB domain-containing protein 1-like [Cucumis sativus]
Csa6G490930	--	--	--	--	--	[I]	Lipid transport and metabolism	--	Predicted protein GN=POPTRDRAFT_1083185 OS=Populus trichocarpa (Western balsam poplar) PE=2 SV=1	I	Lipid transport and metabolism	PREDICTED: uncharacterized protein LOC101215678 [Cucumis sativus]
Csa2G234510	[I]	Lipid transport and metabolism	Molecular Function: hydrolase activity (GO:0016787);; Molecular Function: carboxylic ester hydrolase activity (GO:0052689);;	--	--	[V]	Defense mechanisms	alpha/beta hydrolase fold;; Carboxylesterase family;; Alpha/beta hydrolase family	Hormone-sensitive lipase GN=MTR_4g086510 OS=Medicago truncatula (Barrel medic) PE=4 SV=1	V	Defense mechanisms	PREDICTED: probable carboxylesterase 7-like [Cucumis sativus]
Csa1G572370	--	--	--	--	--	[T]	Signal transduction mechanisms	NB-ARC domain;; Leucine Rich repeats (2 copies);; Leucine rich repeat	NBS resistance protein GN=MTR_4g021690 OS=Medicago truncatula (Barrel medic) PE=4 SV=1	T	Signal transduction mechanisms	PREDICTED: putative disease resistance protein RGA4-like [Cucumis sativus]
Csa3G127070	--	--	Biological Process: response to osmotic stress (GO:0006970);; Biological Process: response to water deprivation (GO:0009414);; Cellular Component: plasmodesma (GO:0009506);; Biological Process: embryo development (GO:0009790);; Biological Process: metal ion transport (GO:0030001);; Molecular Function: metal ion binding (GO:0046872);; Biological Process: seed development (GO:0048316);;	--	--	--	--	Late embryogenesis abundant (LEA) group 1	Putative uncharacterized protein GN=RCOM_0659670 OS=Ricinus communis (Castor bean) PE=4 SV=1	--	--	PREDICTED: uncharacterized protein LOC101219295 [Cucumis sativus]
Csa1G533660	--	--	Molecular Function: protein binding (GO:0005515);; Biological Process: chloroplast organization (GO:0009658);; Cellular Component: viral envelope (GO:0019031);; Cellular Component: Tic complex (GO:0031897);; Biological Process: protein import into chloroplast stroma (GO:0045037);;	--	--	--	--	--	Uncharacterized protein GN=PRUPE_ppa000779mg OS=Prunus persica (Peach) PE=4 SV=1	S	Function unknown	PREDICTED: protein TIC110, chloroplastic-like [Cucumis sativus]
Csa4G314510	--	--	Cellular Component: plasma membrane (GO:0005886);; Cellular Component: membrane (GO:0016020);;	--	--	--	--	Domain of unknown function (DUF588)	Uncharacterized protein GN=PRUPE_ppa011435mg OS=Prunus persica (Peach) PE=4 SV=1	S	Function unknown	PREDICTED: CASP-like protein ARALYDRAFT_321547-like [Cucumis sativus]
Csa1G011440	[RTKL]	General function prediction only;; Signal transduction mechanisms;; Transcription;; Replication, recombination and repair	Molecular Function: protein serine/threonine kinase activity (GO:0004674);; Molecular Function: ATP binding (GO:0005524);; Biological Process: protein phosphorylation (GO:0006468);; Cellular Component: cytoplasmic membrane-bounded vesicle (GO:0016023);; Molecular Function: metal ion binding (GO:0046872);;	--	--	[T]	Signal transduction mechanisms	Carbohydrate-binding protein of the ER;; Protein tyrosine kinase;; Protein kinase domain;; Di-glucose binding within endoplasmic reticulum	Uncharacterized protein GN=PRUPE_ppa014805mg OS=Prunus persica (Peach) PE=4 SV=1	T	Signal transduction mechanisms	PREDICTED: probable receptor-like protein kinase At5g61350-like [Cucumis sativus]
Csa3G183970	--	--	Biological Process: protein folding (GO:0006457);; Biological Process: response to heat (GO:0009408);; Biological Process: response to high light intensity (GO:0009644);; Biological Process: response to hydrogen peroxide (GO:0042542);;	--	--	--	--	--	Uncharacterized protein OS=Glycine max (Soybean) PE=2 SV=1	S	Function unknown	PREDICTED: uncharacterized protein LOC101223310 [Cucumis sativus]
Csa4G064030	[R]	General function prediction only	Cellular Component: cytoplasmic membrane-bounded vesicle (GO:0016023);;	K06955|0|csv:101216187|uncharacterized LOC101216187; K06955 (A)	--	--	--	NAD(P)-binding Rossmann-like domain;; FAD dependent oxidoreductase;; Flavin containing amine oxidoreductase;; Glucose inhibited division protein A;; Thi4 family	Predicted protein GN=POPTRDRAFT_787255 OS=Populus trichocarpa (Western balsam poplar) PE=4 SV=1	R	General function prediction only	PREDICTED: uncharacterized protein LOC101216187 [Cucumis sativus]
Csa3G516510	--	--	Cellular Component: Golgi apparatus (GO:0005794);; Biological Process: pollen development (GO:0009555);; Biological Process: pollen tube growth (GO:0009860);; Biological Process: carbohydrate biosynthetic process (GO:0016051);; Molecular Function: polygalacturonate 4-alpha-galacturonosyltransferase activity (GO:0047262);; Biological Process: cell wall pectin biosynthetic process (GO:0052325);; Ce…	K13648|0|csv:101206803|probable galacturonosyltransferase 14-like; K13648 alpha-1,4-galacturonosyltransferase [EC:2.4.1.43] (A)	Starch and sucrose metabolism (ko00500);; Amino sugar and nucleotide sugar metabolism (ko00520)	--	--	Glycosyl transferase family 8	Putative uncharacterized protein GN=VIT_14s0108g01520 OS=Vitis vinifera (Grape) PE=4 SV=1	G	Carbohydrate transport and metabolism	PREDICTED: probable galacturonosyltransferase 14-like [Cucumis sativus]
Csa1G599550	[J]	Translation, ribosomal structure and biogenesis	Molecular Function: translation elongation factor activity (GO:0003746);; Cellular Component: mitochondrion (GO:0005739);; Biological Process: translational elongation (GO:0006414);; Cellular Component: chloroplast (GO:0009507);; Biological Process: peptide biosynthetic process (GO:0043043);;	--	--	--	--	Elongation factor P, C-terminal;; Elongation factor P (EF-P) OB domain;; Elongation factor P (EF-P) KOW-like domain	Putative uncharacterized protein OS=Glycine max (Soybean) PE=2 SV=1	S	Function unknown	PREDICTED: elongation factor P-like [Cucumis sativus]
Csa5G467900	--	--	Molecular Function: hydrolase activity, hydrolyzing O-glycosyl compounds (GO:0004553);; Cellular Component: mitochondrion (GO:0005739);; Biological Process: carbohydrate metabolic process (GO:0005975);; Biological Process: embryo development ending in seed dormancy (GO:0009793);; Cellular Component: chloroplast envelope (GO:0009941);; Cellular Component: viral envelope (GO:0019031);;	--	--	[S]	Function unknown	Leucine Rich repeat;; Leucine Rich repeats (2 copies);; Leucine Rich Repeat;; Leucine rich repeat;; Leucine rich repeat	Putative uncharacterized protein GN=VIT_01s0026g00610 OS=Vitis vinifera (Grape) PE=4 SV=1	S	Function unknown	PREDICTED: protein NLRC3-like [Cucumis sativus]
Csa3G736940	--	--	Cellular Component: cell part (GO:0044464);;	--	--	--	--	--	Putative uncharacterized protein GN=VIT_08s0040g02260 OS=Vitis vinifera (Grape) PE=4 SV=1	S	Function unknown	PREDICTED: uncharacterized protein LOC101232627 [Cucumis sativus]
Csa3G610810	[S]	Function unknown	Biological Process: MAPK cascade (GO:0000165);; Biological Process: response to molecule of bacterial origin (GO:0002237);; Molecular Function: MAP kinase activity (GO:0004707);; Molecular Function: ATP binding (GO:0005524);; Cellular Component: plasma membrane (GO:0005886);; Biological Process: protein phosphorylation (GO:0006468);; Biological Process: transmembrane receptor protein tyrosine kin…	--	--	--	--	Leucine Rich repeats (2 copies);; Protein kinase domain;; Leucine rich repeat;; Protein tyrosine kinase;; Leucine Rich Repeat;; Leucine Rich repeat;; Leucine rich repeat;; Leucine rich repeat N-terminal domain	Receptor protein kinase CLAVATA1, putative GN=RCOM_2078690 OS=Ricinus communis (Castor bean) PE=4 SV=1	T	Signal transduction mechanisms	PREDICTED: leucine-rich repeat receptor-like protein kinase PXL2-like [Cucumis sativus]
Csa5G611700	[G]	Carbohydrate transport and metabolism	Molecular Function: ribose-5-phosphate isomerase activity (GO:0004751);; Cellular Component: cytoplasm (GO:0005737);; Cellular Component: cytosol (GO:0005829);; Biological Process: cell death (GO:0008219);; Biological Process: pentose-phosphate shunt, non-oxidative branch (GO:0009052);; Biological Process: response to wounding (GO:0009611);; Biological Process: response to fungus (GO:0009620);; B…	K01807|0|csv:101211316|probable ribose-5-phosphate isomerase-like; K01807 ribose 5-phosphate isomerase A [EC:5.3.1.6] (A)	Pentose phosphate pathway (ko00030);; Carbon fixation in photosynthetic organisms (ko00710);; Carbon metabolism (ko01200);; Biosynthesis of amino acids (ko01230)	[G]	Carbohydrate transport and metabolism	Ribose 5-phosphate isomerase A (phosphoriboisomerase A)	Putative uncharacterized protein GN=VIT_01s0011g04630 OS=Vitis vinifera (Grape) PE=3 SV=1	G	Carbohydrate transport and metabolism	PREDICTED: probable ribose-5-phosphate isomerase-like [Cucumis sativus]
Csa1G627440	--	--	Cellular Component: mitochondrion (GO:0005739);;	--	--	[R]	General function prediction only	PPR repeat family;; PPR repeat;; PPR repeat;; Pentatricopeptide repeat domain;; Mitochondrial 28S ribosomal protein S27;; Tetratricopeptide repeat;; Tetratricopeptide repeat;; Anaphase-promoting complex, cyclosome, subunit 3;; Evolutionarily conserved signalling intermediate in Toll pathway	Predicted protein GN=POPTRDRAFT_641463 OS=Populus trichocarpa (Western balsam poplar) PE=2 SV=1	R	General function prediction only	PREDICTED: LOW QUALITY PROTEIN: pentatricopeptide repeat-containing protein At5g01110-like [Cucumis sativus]
Csa4G051460	[R]	General function prediction only	Molecular Function: nucleotide binding (GO:0000166);; Molecular Function: protein binding (GO:0005515);; Cellular Component: nuclear envelope (GO:0005635);; Cellular Component: cytoplasm (GO:0005737);; Cellular Component: heterotrimeric G-protein complex (GO:0005834);; Biological Process: protein targeting to mitochondrion (GO:0006626);; Biological Process: fatty acid beta-oxidation (GO:0006635);…	K14299|0|csv:101224101|nucleoporin seh1-like; K14299 nucleoporin SEH1 (A)	RNA transport (ko03013)	[YU]	Nuclear structure;; Intracellular trafficking, secretion, and vesicular transport	WD domain, G-beta repeat	Uncharacterized protein GN=PRUPE_ppa008587mg OS=Prunus persica (Peach) PE=4 SV=1	UY	Intracellular trafficking, secretion, and vesicular transport;; Nuclear structure	PREDICTED: nucleoporin seh1-like [Cucumis sativus]
Csa3G911790	--	--	Molecular Function: RNA binding (GO:0003723);; Molecular Function: RNA-directed DNA polymerase activity (GO:0003964);; Molecular Function: phospholipid binding (GO:0005543);; Cellular Component: vacuole (GO:0005773);; Cellular Component: Golgi apparatus (GO:0005794);; Cellular Component: plasma membrane (GO:0005886);; Biological Process: RNA-dependent DNA replication (GO:0006278);; Biological Pro…	--	--	[U]	Intracellular trafficking, secretion, and vesicular transport	--	Uncharacterized protein GN=PRUPE_ppa000004mg OS=Prunus persica (Peach) PE=4 SV=1	U	Intracellular trafficking, secretion, and vesicular transport	PREDICTED: LOW QUALITY PROTEIN: uncharacterized LOC101224603 [Cucumis sativus]
Csa2G270860	--	--	Cellular Component: mitochondrion (GO:0005739);; Biological Process: protein folding (GO:0006457);; Biological Process: response to heat (GO:0009408);; Cellular Component: plastid (GO:0009536);; Biological Process: response to high light intensity (GO:0009644);; Biological Process: response to endoplasmic reticulum stress (GO:0034976);; Biological Process: response to hydrogen peroxide (GO:004254…	--	--	[S]	Function unknown	Protein of unknown function (DUF1279)	Uncharacterized protein GN=PRUPE_ppa012877mg OS=Prunus persica (Peach) PE=4 SV=1	S	Function unknown	PREDICTED: uncharacterized protein LOC101221163 [Cucumis sativus]
Cucumber_newGene_1054	--	--	Molecular Function: transferase activity (GO:0016740);;	K14500|2.84411e-15|cmo:103483405|probable serine/threonine-protein kinase At4g35230; K14500 BR-signaling kinase [EC:2.7.11.1] (A)	Plant hormone signal transduction (ko04075)	--	--	--	Serine/threonine-protein kinase CTR1 GN=CTR1 OS=Arabidopsis thaliana (Mouse-ear cress) PE=1 SV=1	T	Signal transduction mechanisms	hypothetical protein Csa_4G640990 [Cucumis sativus]
Csa6G497350	[R]	General function prediction only	Molecular Function: zinc ion binding (GO:0008270);; Biological Process: response to bacterium (GO:0009617);; Biological Process: plant-type hypersensitive response (GO:0009626);; Biological Process: lignin biosynthetic process (GO:0009809);; Molecular Function: aryl-alcohol dehydrogenase (NAD+) activity (GO:0018456);; Molecular Function: cinnamyl-alcohol dehydrogenase activity (GO:0045551);; Mole…	K00083|0|csv:101222715|SECAD1; probable mannitol dehydrogenase-like; K00083 cinnamyl-alcohol dehydrogenase [EC:1.1.1.195] (A)	Phenylpropanoid biosynthesis (ko00940)	[Q]	Secondary metabolites biosynthesis, transport and catabolism	Alcohol dehydrogenase GroES-like domain;; Zinc-binding dehydrogenase;; D-isomer specific 2-hydroxyacid dehydrogenase, NAD binding domain	Somatic embryogenesis cinnamyl alcohol dehydrogenase 1 GN=SECAD1 OS=Cucumis sativus (Cucumber) PE=2 SV=1	Q	Secondary metabolites biosynthesis, transport and catabolism	probable mannitol dehydrogenase-like [Cucumis sativus]
Csa2G279270	--	--	Molecular Function: peroxidase activity (GO:0004601);; Cellular Component: chloroplast stroma (GO:0009570);; Molecular Function: peroxiredoxin activity (GO:0051920);; Biological Process: oxidation-reduction process (GO:0055114);;	--	--	[S]	Function unknown	AhpC/TSA antioxidant enzyme;; AhpC/TSA family	Predicted protein GN=POPTRDRAFT_571999 OS=Populus trichocarpa (Western balsam poplar) PE=4 SV=1	S	Function unknown	PREDICTED: thioredoxin-like protein AAED1, chloroplastic-like [Cucumis sativus]
Csa3G114520	--	--	Cellular Component: endosome (GO:0005768);; Cellular Component: Golgi apparatus (GO:0005794);; Cellular Component: trans-Golgi network (GO:0005802);; Biological Process: metabolic process (GO:0008152);; Cellular Component: membrane (GO:0016020);; Molecular Function: glucuronosyl-N-acetylglucosaminyl-proteoglycan 4-alpha-N-acetylglucosaminyltransferase activity (GO:0050508);;	--	--	[GMW]	Carbohydrate transport and metabolism;; Cell wall/membrane/envelope biogenesis;; Extracellular structures	Exostosin family	Putative uncharacterized protein GN=VITISV_033460 OS=Vitis vinifera (Grape) PE=4 SV=1	GMW	Carbohydrate transport and metabolism;; Cell wall/membrane/envelope biogenesis;; Extracellular structures	PREDICTED: LOW QUALITY PROTEIN: probable glycosyltransferase At3g07620-like, partial [Cucumis sativus]
Csa5G152810	[RTKL]	General function prediction only;; Signal transduction mechanisms;; Transcription;; Replication, recombination and repair	Biological Process: MAPK cascade (GO:0000165);; Molecular Function: MAP kinase activity (GO:0004707);; Molecular Function: ATP binding (GO:0005524);; Biological Process: regulation of transcription, DNA-templated (GO:0006355);; Biological Process: protein phosphorylation (GO:0006468);; Biological Process: protein targeting to membrane (GO:0006612);; Biological Process: response to bacterium (GO:0…	K04371|0|csv:101231335|mitogen-activated protein kinase 4-like; K04371 mitogen-activated protein kinase 1/3 [EC:2.7.11.24] (A)	--	[T]	Signal transduction mechanisms	Protein kinase domain;; Protein tyrosine kinase	Uncharacterized protein GN=PRUPE_ppa007254mg OS=Prunus persica (Peach) PE=4 SV=1	T	Signal transduction mechanisms	PREDICTED: mitogen-activated protein kinase 4-like [Cucumis sativus]
Csa3G011630	[G]	Carbohydrate transport and metabolism	Molecular Function: catalytic activity (GO:0003824);; Biological Process: proteolysis (GO:0006508);; Biological Process: metabolic process (GO:0008152);; Molecular Function: cysteine-type peptidase activity (GO:0008234);;	--	--	--	--	--	Pherophorin-dz1 protein (Precursor) OS=Volvox carteri f. nagariensis PE=2 SV=1	--	--	hypothetical protein PDIG_54330 [Penicillium digitatum PHI26]
Csa6G127430	--	--	Cellular Component: membrane (GO:0016020);;	--	--	--	--	Plastocyanin-like domain	Predicted protein (Fragment) GN=POPTRDRAFT_292985 OS=Populus trichocarpa (Western balsam poplar) PE=4 SV=1	S	Function unknown	PREDICTED: early nodulin-like protein 1-like [Cucumis sativus]
Csa5G594440	--	--	Molecular Function: monooxygenase activity (GO:0004497);; Molecular Function: binding (GO:0005488);; Molecular Function: oxidoreductase activity (GO:0016491);; Molecular Function: oxidoreductase activity, acting on paired donors, with incorporation or reduction of molecular oxygen (GO:0016705);;	--	--	[Q]	Secondary metabolites biosynthesis, transport and catabolism	--	Putative uncharacterized protein GN=VITISV_023587 OS=Vitis vinifera (Grape) PE=3 SV=1	Q	Secondary metabolites biosynthesis, transport and catabolism	PREDICTED: cytochrome P450 71B37-like [Cucumis sativus]
Csa7G073760	[R]	General function prediction only	Molecular Function: metalloendopeptidase activity (GO:0004222);; Cellular Component: mitochondrion (GO:0005739);; Biological Process: proteolysis (GO:0006508);; Molecular Function: zinc ion binding (GO:0008270);; Cellular Component: chloroplast stroma (GO:0009570);; Biological Process: chloroplast organization (GO:0009658);; Cellular Component: chloroplast envelope (GO:0009941);; Biological Proce…	K06972|0|csv:101206839|presequence protease 1, chloroplastic/mitochondrial-like; K06972 (A)	--	[RO]	General function prediction only;; Posttranslational modification, protein turnover, chaperones	Peptidase M16C associated;; Peptidase M16 inactive domain;; Insulinase (Peptidase family M16)	Putative uncharacterized protein GN=VIT_03s0063g00680 OS=Vitis vinifera (Grape) PE=2 SV=1	O	Posttranslational modification, protein turnover, chaperones	PREDICTED: presequence protease 1, chloroplastic/mitochondrial-like [Cucumis sativus]
Csa3G116870	--	--	Biological Process: protein glycosylation (GO:0006486);; Biological Process: transport (GO:0006810);; Biological Process: cellular process (GO:0009987);; Molecular Function: metal ion binding (GO:0046872);;	--	--	[U]	Intracellular trafficking, secretion, and vesicular transport	Golgi CORVET complex core vacuolar protein 8;; Region in Clathrin and VPS	Putative uncharacterized protein GN=VIT_15s0048g02590 OS=Vitis vinifera (Grape) PE=4 SV=1	U	Intracellular trafficking, secretion, and vesicular transport	PREDICTED: vacuolar protein sorting-associated protein 8 homolog [Cucumis sativus]
Csa6G152900	--	--	--	K14432|6.82614e-12|csv:101230807|ABSCISIC ACID-INSENSITIVE 5-like protein 1-like; K14432 ABA responsive element binding factor (A)	Plant hormone signal transduction (ko04075)	--	--	--	--	--	--	PREDICTED: ABSCISIC ACID-INSENSITIVE 5-like protein 1-like [Cucumis sativus]
Csa1G538780	[E]	Amino acid transport and metabolism	Cellular Component: endosome (GO:0005768);; Cellular Component: Golgi apparatus (GO:0005794);; Cellular Component: trans-Golgi network (GO:0005802);; Cellular Component: plasma membrane (GO:0005886);; Biological Process: cation transport (GO:0006812);; Biological Process: chloride transport (GO:0006821);; Molecular Function: sodium:potassium:chloride symporter activity (GO:0008511);; Molecular Fu…	K14427|0|cmo:103488259|cation-chloride cotransporter 1; K14427 solute carrier family 12 (potassium/chloride transporter), member 4/5/6 (A)	--	[P]	Inorganic ion transport and metabolism	Amino acid permease;; Amino acid permease	Cation:chloride symporter, putative GN=RCOM_1092960 OS=Ricinus communis (Castor bean) PE=4 SV=1	P	Inorganic ion transport and metabolism	Cation-chloride co-transporter 1 [Theobroma cacao]
Csa1G033100	--	--	--	--	--	[R]	General function prediction only	PPR repeat family;; PPR repeat;; PPR repeat;; Pentatricopeptide repeat domain	Putative uncharacterized protein GN=VIT_17s0000g06090 OS=Vitis vinifera (Grape) PE=4 SV=1	R	General function prediction only	PREDICTED: LOW QUALITY PROTEIN: putative pentatricopeptide repeat-containing protein At1g74580-like [Cucumis sativus]
Csa4G642300	[Q]	Secondary metabolites biosynthesis, transport and catabolism	Molecular Function: monooxygenase activity (GO:0004497);; Molecular Function: oxidoreductase activity, acting on paired donors, with incorporation or reduction of molecular oxygen (GO:0016705);; Molecular Function: metal ion binding (GO:0046872);;	--	--	[Q]	Secondary metabolites biosynthesis, transport and catabolism	Cytochrome P450	Putative uncharacterized protein GN=VIT_18s0001g09510 OS=Vitis vinifera (Grape) PE=3 SV=1	Q	Secondary metabolites biosynthesis, transport and catabolism	PREDICTED: cytochrome P450 81D1-like [Cucumis sativus]
Csa1G024880	[V]	Defense mechanisms	Cellular Component: vacuolar membrane (GO:0005774);; Cellular Component: plasma membrane (GO:0005886);; Biological Process: drug transmembrane transport (GO:0006855);; Biological Process: response to nematode (GO:0009624);; Molecular Function: drug transmembrane transporter activity (GO:0015238);; Molecular Function: antiporter activity (GO:0015297);;	K03327|0|csv:101217888|MATE efflux family protein 7-like; K03327 multidrug resistance protein, MATE family (A)	--	[R]	General function prediction only	MatE	Putative uncharacterized protein GN=VIT_17s0000g02970 OS=Vitis vinifera (Grape) PE=4 SV=1	S	Function unknown	PREDICTED: MATE efflux family protein 7-like [Cucumis sativus]
Csa7G374690	--	--	--	--	--	[L]	Replication, recombination and repair	Smr domain;; Domain of unknown function (DUF1771)	Putative uncharacterized protein GN=VIT_07s0130g00370 OS=Vitis vinifera (Grape) PE=4 SV=1	L	Replication, recombination and repair	PREDICTED: uncharacterized protein LOC101223137 [Cucumis sativus]
Csa7G012930	--	--	Biological Process: cobalt ion transport (GO:0006824);; Molecular Function: cobalt ion transmembrane transporter activity (GO:0015087);; Molecular Function: nickel cation transmembrane transporter activity (GO:0015099);; Cellular Component: integral component of membrane (GO:0016021);; Biological Process: nickel cation transmembrane transport (GO:0035444);; Molecular Function: metal ion binding (…	--	--	--	--	High-affinity nickel-transport protein;; Cytochrome C biogenesis protein transmembrane region	Uncharacterized protein OS=Glycine max (Soybean) PE=4 SV=1	S	Function unknown	PREDICTED: uncharacterized protein LOC101208891 [Cucumis sativus]
Csa3G128960	[RTKL]	General function prediction only;; Signal transduction mechanisms;; Transcription;; Replication, recombination and repair	Molecular Function: protein serine/threonine kinase activity (GO:0004674);; Molecular Function: ATP binding (GO:0005524);; Cellular Component: plasma membrane (GO:0005886);; Biological Process: protein phosphorylation (GO:0006468);;	--	--	[T]	Signal transduction mechanisms	Protein kinase domain;; Protein tyrosine kinase	ATP binding protein, putative GN=RCOM_0658600 OS=Ricinus communis (Castor bean) PE=3 SV=1	T	Signal transduction mechanisms	PREDICTED: probable receptor-like protein kinase At5g47070-like [Cucumis sativus]
Csa6G516830	--	--	--	K15601|0|csv:101212609|uncharacterized LOC101212609; K15601 lysine-specific demethylase 3 [EC:1.14.11.-] (A)	--	[K]	Transcription	WRC;; JmjC domain, hydroxylase	Uncharacterized protein GN=PRUPE_ppa000920mg OS=Prunus persica (Peach) PE=4 SV=1	K	Transcription	PREDICTED: uncharacterized protein LOC101212609 [Cucumis sativus]
Csa3G785400	[RTKL]	General function prediction only;; Signal transduction mechanisms;; Transcription;; Replication, recombination and repair	Molecular Function: calmodulin-dependent protein kinase activity (GO:0004683);; Molecular Function: calcium ion binding (GO:0005509);; Molecular Function: ATP binding (GO:0005524);; Biological Process: protein phosphorylation (GO:0006468);; Biological Process: plant-type cell wall modification (GO:0009827);; Biological Process: pollen tube growth (GO:0009860);;	K13412|0|csv:101213335|calcium-dependent protein kinase 20-like; K13412 calcium-dependent protein kinase [EC:2.7.11.1] (A)	Plant-pathogen interaction (ko04626)	[T]	Signal transduction mechanisms	Protein kinase domain;; EF hand;; EF-hand domain pair;; Protein tyrosine kinase;; EF-hand domain;; EF-hand domain pair;; EF hand;; Cytoskeletal-regulatory complex EF hand;; Phosphotransferase enzyme family;; Lipopolysaccharide kinase (Kdo/WaaP) family	Uncharacterized protein GN=PRUPE_ppa003092mg OS=Prunus persica (Peach) PE=4 SV=1	T	Signal transduction mechanisms	PREDICTED: calcium-dependent protein kinase 20-like [Cucumis sativus]
Csa4G304810	--	--	--	--	--	[S]	Function unknown	CG-1 domain;; Ankyrin repeats (many copies);; Ankyrin repeats (3 copies);; Ankyrin repeat;; IQ calmodulin-binding motif	Putative uncharacterized protein GN=VIT_05s0020g00630 OS=Vitis vinifera (Grape) PE=4 SV=1	K	Transcription	PREDICTED: calmodulin-binding transcription activator 2-like [Cucumis sativus]
Csa5G606300	--	--	Cellular Component: membrane (GO:0016020);;	--	--	--	--	Domain of unknown function (DUF588)	Uncharacterized protein GN=Si007348m.g OS=Setaria italica (Foxtail millet) PE=3 SV=1	S	Function unknown	PREDICTED: CASP-like protein RCOM_0837390-like [Cucumis sativus]
Csa4G651750	--	--	Molecular Function: DNA binding (GO:0003677);; Molecular Function: aspartic-type endopeptidase activity (GO:0004190);; Cellular Component: extracellular region (GO:0005576);; Biological Process: proteolysis (GO:0006508);;	--	--	[O]	Posttranslational modification, protein turnover, chaperones	Xylanase inhibitor N-terminal;; Xylanase inhibitor C-terminal;; Eukaryotic aspartyl protease	Uncharacterized protein GN=PRUPE_ppa004762mg OS=Prunus persica (Peach) PE=4 SV=1	O	Posttranslational modification, protein turnover, chaperones	PREDICTED: protein ASPARTIC PROTEASE IN GUARD CELL 1-like [Cucumis sativus]
Csa4G639850	--	--	--	--	--	--	--	Remorin, C-terminal region	Putative uncharacterized protein GN=VIT_18s0001g10420 OS=Vitis vinifera (Grape) PE=4 SV=1	S	Function unknown	PREDICTED: uncharacterized protein LOC101215278 [Cucumis sativus]
Csa2G285280	--	--	--	--	--	--	--	--	--	--	--	Uncharacterized protein TCM_039540 [Theobroma cacao]
Csa5G647570	--	--	Biological Process: defense response (GO:0006952);; Biological Process: signal transduction (GO:0007165);; Molecular Function: ADP binding (GO:0043531);;	--	--	--	--	TIR domain;; TIR domain	Fom-1 GN=Fom-1 OS=Cucumis melo (Muskmelon) PE=4 SV=1	S	Function unknown	PREDICTED: TMV resistance protein N-like [Cucumis sativus]
Csa6G452130	--	--	Cellular Component: intracellular (GO:0005622);; Cellular Component: cytoplasmic part (GO:0044444);;	--	--	[U]	Intracellular trafficking, secretion, and vesicular transport	Endomembrane protein 70	Predicted protein GN=POPTRDRAFT_594980 OS=Populus trichocarpa (Western balsam poplar) PE=4 SV=1	U	Intracellular trafficking, secretion, and vesicular transport	PREDICTED: putative phagocytic receptor 1b-like [Cucumis sativus]
Csa2G005270	--	--	Biological Process: embryo development ending in seed dormancy (GO:0009793);; Cellular Component: membrane (GO:0016020);;	--	--	[S]	Function unknown	Serine incorporator (Serinc)	Maternal effect embryo arrest 55-1 protein OS=Dimocarpus longan PE=2 SV=1	S	Function unknown	PREDICTED: serine incorporator 1-like [Cucumis sativus]
Csa2G385010	[J]	Translation, ribosomal structure and biogenesis	Biological Process: RNA methylation (GO:0001510);; Molecular Function: structural constituent of ribosome (GO:0003735);; Molecular Function: catalytic activity (GO:0003824);; Cellular Component: nucleolus (GO:0005730);; Biological Process: rRNA processing (GO:0006364);; Biological Process: translation (GO:0006412);; Biological Process: metabolic process (GO:0008152);; Cellular Component: cytosoli…	K02896|1.08571e-110|csv:101203027|probable ribosome biogenesis protein RLP24-like; K02896 large subunit ribosomal protein L24e (A)	Ribosome (ko03010)	[J]	Translation, ribosomal structure and biogenesis	Ribosomal protein L24e	Uncharacterized protein GN=Solyc10g078660.1 OS=Solanum lycopersicum (Tomato) PE=4 SV=1	J	Translation, ribosomal structure and biogenesis	PREDICTED: probable ribosome biogenesis protein RLP24-like isoform 1 [Cucumis sativus]
Csa4G637760	--	--	Cellular Component: nucleus (GO:0005634);; Cellular Component: plasma membrane (GO:0005886);; Cellular Component: plasmodesma (GO:0009506);; Cellular Component: integral component of membrane (GO:0016021);;	K15377|0|csv:101206929|choline transporter-like protein 2-like; K15377 solute carrier family 44 (choline transporter-like protein), member 2/4/5 (A)	--	[I]	Lipid transport and metabolism	Plasma-membrane choline transporter	Uncharacterized protein GN=PRUPE_ppa002216mg OS=Prunus persica (Peach) PE=4 SV=1	I	Lipid transport and metabolism	PREDICTED: choline transporter-like protein 2-like [Cucumis sativus]
Csa3G915190	--	--	Cellular Component: nucleus (GO:0005634);; Cellular Component: cytosol (GO:0005829);; Biological Process: pollen germination (GO:0009846);; Biological Process: pollen tube growth (GO:0009860);;	--	--	--	--	--	Uncharacterized protein GN=PRUPE_ppa010282mg OS=Prunus persica (Peach) PE=4 SV=1	R	General function prediction only	PREDICTED: uncharacterized protein LOC101206166 [Cucumis sativus]
Csa5G292250	[L]	Replication, recombination and repair	--	K10706|0|cmo:103496680|helicase SEN1-like; K10706 senataxin [EC:3.6.4.-] (A)	--	[A]	RNA processing and modification	AAA domain;; AAA domain;; Viral (Superfamily 1) RNA helicase;; AAA domain	Uncharacterized protein (Fragment) GN=PGSC0003DMG401008570 OS=Solanum tuberosum (Potato) PE=4 SV=1	A	RNA processing and modification	PREDICTED: regulator of nonsense transcripts 1 homolog [Cucumis sativus]
Csa7G073680	[Q]	Secondary metabolites biosynthesis, transport and catabolism	Molecular Function: iron ion binding (GO:0005506);; Molecular Function: electron carrier activity (GO:0009055);; Biological Process: abscisic acid metabolic process (GO:0009687);; Biological Process: response to red light (GO:0010114);; Molecular Function: (+)-abscisic acid 8'-hydroxylase activity (GO:0010295);; Molecular Function: oxygen binding (GO:0019825);; Molecular Function: heme binding (G…	K09843|0|csv:101219389|abscisic acid 8'-hydroxylase 4-like; K09843 (+)-abscisic acid 8'-hydroxylase [EC:1.14.13.93] (A)	Carotenoid biosynthesis (ko00906)	[QI]	Secondary metabolites biosynthesis, transport and catabolism;; Lipid transport and metabolism	Cytochrome P450	Cytochrome P450 GN=CYP707A12v1 OS=Populus trichocarpa (Western balsam poplar) PE=2 SV=1	Q	Secondary metabolites biosynthesis, transport and catabolism	PREDICTED: abscisic acid 8&apos;-hydroxylase 4-like [Cucumis sativus]
Csa6G487780	--	--	Cellular Component: nucleus (GO:0005634);;	--	--	--	--	--	Predicted protein GN=POPTRDRAFT_1083368 OS=Populus trichocarpa (Western balsam poplar) PE=4 SV=1	S	Function unknown	PREDICTED: BTB/POZ domain-containing protein At3g50780-like [Cucumis sativus]
Csa4G410820	[R]	General function prediction only	Cellular Component: extracellular region (GO:0005576);; Cellular Component: plastid (GO:0009536);;	--	--	[R]	General function prediction only	Alpha/beta hydrolase family;; Alpha/beta hydrolase family;; alpha/beta hydrolase fold;; Prolyl oligopeptidase family;; Serine hydrolase (FSH1)	Putative uncharacterized protein GN=VIT_14s0006g02620 OS=Vitis vinifera (Grape) PE=4 SV=1	R	General function prediction only	PREDICTED: abhydrolase domain-containing protein FAM108B1-like [Cucumis sativus]
Csa1G004180	--	--	--	--	--	--	--	--	Uncharacterized protein OS=Glycine max (Soybean) PE=4 SV=1	S	Function unknown	PREDICTED: uncharacterized protein LOC101204691 [Cucumis sativus]
Csa5G627090	[R]	General function prediction only	Molecular Function: oxidoreductase activity, acting on paired donors, with incorporation or reduction of molecular oxygen, 2-oxoglutarate as one donor, and incorporation of one atom each of oxygen into both donors (GO:0016706);;	--	--	[QR]	Secondary metabolites biosynthesis, transport and catabolism;; General function prediction only	2OG-Fe(II) oxygenase superfamily;; non-haem dioxygenase in morphine synthesis N-terminal	Predicted protein GN=POPTRDRAFT_566450 OS=Populus trichocarpa (Western balsam poplar) PE=2 SV=1	Q	Secondary metabolites biosynthesis, transport and catabolism	PREDICTED: 1-aminocyclopropane-1-carboxylate oxidase homolog 6-like [Cucumis sativus]
Csa7G392300	--	--	Biological Process: cytokinesis (GO:0000910);; Molecular Function: receptor activity (GO:0004872);; Cellular Component: endoplasmic reticulum lumen (GO:0005788);; Molecular Function: zinc ion binding (GO:0008270);; Biological Process: auxin-activated signaling pathway (GO:0009734);; Biological Process: unidimensional cell growth (GO:0009826);; Molecular Function: auxin binding (GO:0010011);; Mole…	--	--	--	--	Auxin binding protein;; Cupin domain	Auxin-binding protein 1 GN=ABP1 OS=Vitis vinifera (Grape) PE=2 SV=1	T	Signal transduction mechanisms	PREDICTED: auxin-binding protein T85-like [Cucumis sativus]
Csa1G062370	--	--	Cellular Component: extracellular region (GO:0005576);; Cellular Component: plasma membrane (GO:0005886);; Biological Process: carbohydrate metabolic process (GO:0005975);; Molecular Function: zinc ion binding (GO:0008270);; Cellular Component: cytoplasmic membrane-bounded vesicle (GO:0016023);; Molecular Function: glucan endo-1,3-beta-D-glucosidase activity (GO:0042973);; Molecular Function: cat…	--	--	--	--	Glycosyl hydrolases family 17;; X8 domain	Glucan endo-13-beta-glucosidase OS=Cucumis melo subsp. melo PE=3 SV=1	R	General function prediction only	PREDICTED: glucan endo-1,3-beta-glucosidase 1-like [Cucumis sativus]
Csa3G697910	--	--	Cellular Component: plasma membrane (GO:0005886);; Cellular Component: anchored component of membrane (GO:0031225);;	--	--	--	--	--	Uncharacterized protein GN=Bra014611 OS=Brassica rapa subsp. pekinensis (Chinese cabbage) PE=4 SV=1	--	--	arabinogalactan protein 23 [Arabidopsis thaliana]
Csa6G445780	[E]	Amino acid transport and metabolism	Cellular Component: cytoplasm (GO:0005737);; Biological Process: L-phenylalanine catabolic process (GO:0006559);; Biological Process: response to oxidative stress (GO:0006979);; Biological Process: pollen development (GO:0009555);; Biological Process: cinnamic acid biosynthetic process (GO:0009800);; Biological Process: drought recovery (GO:0009819);; Biological Process: response to UV-B (GO:0010…	K10775|0|csv:101218856|phenylalanine ammonia-lyase-like; K10775 phenylalanine ammonia-lyase [EC:4.3.1.24] (A)	Phenylalanine metabolism (ko00360);; Phenylpropanoid biosynthesis (ko00940)	[Q]	Secondary metabolites biosynthesis, transport and catabolism	Aromatic amino acid lyase	Phenylalanine ammonia-lyase GN=PAL OS=Cucumis sativus (Cucumber) PE=2 SV=1	Q	Secondary metabolites biosynthesis, transport and catabolism	PREDICTED: phenylalanine ammonia-lyase-like [Cucumis sativus]
Csa7G008960	--	--	Biological Process: response to red or far red light (GO:0009639);;	K14488|4.28155e-62|csv:101225585|auxin-induced protein X10A-like; K14488 SAUR family protein (A)	Plant hormone signal transduction (ko04075)	--	--	Auxin responsive protein	Uncharacterized protein GN=PRUPE_ppa019366mg OS=Prunus persica (Peach) PE=4 SV=1	S	Function unknown	PREDICTED: auxin-induced protein X10A-like [Cucumis sativus]
Csa6G513730	--	--	Cellular Component: autophagic vacuole membrane (GO:0000421);; Cellular Component: microtubule (GO:0005874);; Biological Process: autophagy (GO:0006914);; Biological Process: CVT pathway (GO:0032258);; Cellular Component: Cvt vesicle membrane (GO:0033110);;	K08341|1.83353e-83|csv:101223536|autophagy-related protein 8C-like; K08341 GABA(A) receptor-associated protein (A)	Regulation of autophagy (ko04140)	[Z]	Cytoskeleton	Autophagy protein Atg8 ubiquitin like;; Ubiquitin-like autophagy protein Apg12	Putative uncharacterized protein GN=VIT_19s0090g00580 OS=Vitis vinifera (Grape) PE=3 SV=1	Z	Cytoskeleton	PREDICTED: autophagy-related protein 8C-like isoform 1 [Cucumis sativus]
Csa6G421680	--	--	Molecular Function: carboxylic ester hydrolase activity (GO:0004091);; Biological Process: lipid metabolic process (GO:0006629);;	--	--	--	--	GDSL-like Lipase/Acylhydrolase	Zinc finger protein, putative GN=RCOM_0511210 OS=Ricinus communis (Castor bean) PE=4 SV=1	R	General function prediction only	PREDICTED: GDSL esterase/lipase At2g42990-like [Cucumis sativus]
Csa1G132070	--	--	Cellular Component: nucleus (GO:0005634);; Biological Process: calcium ion transport (GO:0006816);; Biological Process: cellular zinc ion homeostasis (GO:0006882);; Biological Process: response to nematode (GO:0009624);;	--	--	[S]	Function unknown	Trafficking protein Mon1	Uncharacterized protein (Fragment) GN=PRUPE_ppa003026m1g OS=Prunus persica (Peach) PE=4 SV=1	S	Function unknown	PREDICTED: vacuolar fusion protein MON1 homolog A-like [Cucumis sativus]
Csa3G743960	--	--	--	--	--	--	--	Thaumatin family	Protein P21, putative GN=RCOM_1353310 OS=Ricinus communis (Castor bean) PE=4 SV=1	R	General function prediction only	PREDICTED: uncharacterized protein LOC101217493 [Cucumis sativus]
Csa2G385020	--	--	Biological Process: cellular component organization (GO:0016043);; Cellular Component: intracellular organelle (GO:0043229);; Biological Process: primary metabolic process (GO:0044238);; Biological Process: cellular macromolecule metabolic process (GO:0044260);; Biological Process: single-organism cellular process (GO:0044763);;	--	--	--	--	--	Putative uncharacterized protein OS=Arabidopsis thaliana (Mouse-ear cress) PE=4 SV=1	--	--	unnamed protein product [Arabidopsis thaliana]
Csa5G576630	--	--	Cellular Component: nucleus (GO:0005634);; Biological Process: chromatin assembly or disassembly (GO:0006333);; Biological Process: DNA mediated transformation (GO:0009294);;	K10753|5.35245e-133|csv:101205383|histone chaperone ASF1B-like; K10753 histone chaperone ASF1 (A)	--	[KB]	Transcription;; Chromatin structure and dynamics	ASF1 like histone chaperone	Uncharacterized protein GN=PRUPE_ppa011565mg OS=Prunus persica (Peach) PE=4 SV=1	BK	Chromatin structure and dynamics;; Transcription	PREDICTED: histone chaperone ASF1B-like [Cucumis sativus]
Csa2G249810	--	--	--	--	--	--	--	Dehydrin	Putative uncharacterized protein GN=VIT_03s0038g04390 OS=Vitis vinifera (Grape) PE=3 SV=1	S	Function unknown	PREDICTED: embryogenic cell protein 40-like [Cucumis sativus]
Cucumber_newGene_32	--	--	--	--	--	--	--	DVL family	--	S	Function unknown	PREDICTED: uncharacterized protein LOC103497141 [Cucumis melo]
Csa4G001010	--	--	Biological Process: double-strand break repair via homologous recombination (GO:0000724);; Cellular Component: nucleus (GO:0005634);; Molecular Function: zinc ion binding (GO:0008270);; Biological Process: defense response to bacterium (GO:0042742);; Molecular Function: transcription regulatory region DNA binding (GO:0044212);;	--	--	--	--	--	Putative uncharacterized protein GN=VIT_03s0091g00460 OS=Vitis vinifera (Grape) PE=4 SV=1	R	General function prediction only	PREDICTED: zinc finger SWIM domain-containing protein 7-like [Cucumis sativus]
Csa3G151410	--	--	--	--	--	[U]	Intracellular trafficking, secretion, and vesicular transport	MSP (Major sperm protein) domain	Uncharacterized protein GN=PRUPE_ppa008888mg OS=Prunus persica (Peach) PE=4 SV=1	U	Intracellular trafficking, secretion, and vesicular transport	PREDICTED: vesicle-associated protein 2-2-like [Cucumis sativus]
Csa4G630560	[RTKL]	General function prediction only;; Signal transduction mechanisms;; Transcription;; Replication, recombination and repair	Biological Process: activation of MAPKK activity (GO:0000186);; Molecular Function: MAP kinase kinase kinase activity (GO:0004709);; Molecular Function: ATP binding (GO:0005524);;	K08838|0|csv:101214412|uncharacterized LOC101214412; K08838 serine/threonine-protein kinase 24/25/MST4 [EC:2.7.11.1] (A)	--	[T]	Signal transduction mechanisms	Protein kinase domain;; Protein tyrosine kinase	Putative uncharacterized protein GN=VIT_19s0014g02310 OS=Vitis vinifera (Grape) PE=4 SV=1	T	Signal transduction mechanisms	PREDICTED: uncharacterized protein LOC101214412 [Cucumis sativus]
Csa4G006370	[TZDR]	Signal transduction mechanisms;; Cytoskeleton;; Cell cycle control, cell division, chromosome partitioning;; General function prediction only	Molecular Function: calcium ion binding (GO:0005509);; Cellular Component: vacuole (GO:0005773);; Biological Process: actin filament-based movement (GO:0030048);; Biological Process: Golgi localization (GO:0051645);; Biological Process: mitochondrion localization (GO:0051646);; Biological Process: peroxisome localization (GO:0060151);;	K06268|3.5422e-125|csv:101210062|calcineurin subunit B-like; K06268 serine/threonine-protein phosphatase 2B regulatory subunit (A)	--	[T]	Signal transduction mechanisms	EF-hand domain pair;; EF hand;; EF-hand domain	Calcineurin-like protein GN=EcCBL1 OS=Eucalyptus camaldulensis (River red gum) PE=2 SV=1	T	Signal transduction mechanisms	PREDICTED: calcineurin subunit B-like [Cucumis sativus]
Csa6G521020	--	--	--	--	--	--	--	--	Uncharacterized protein OS=Glycine max (Soybean) PE=4 SV=2	S	Function unknown	PREDICTED: uncharacterized protein LOC101202888 [Cucumis sativus]
Csa3G890020	--	--	Molecular Function: inositol hexakisphosphate binding (GO:0000822);; Biological Process: response to molecule of bacterial origin (GO:0002237);; Molecular Function: ubiquitin-protein transferase activity (GO:0004842);; Cellular Component: nucleus (GO:0005634);; Biological Process: auxin-activated signaling pathway (GO:0009734);; Biological Process: stomatal complex morphogenesis (GO:0010103);; Bi…	--	--	[R]	General function prediction only	Leucine Rich repeat	F-box family protein GN=FBL8 OS=Populus trichocarpa (Western balsam poplar) PE=4 SV=1	R	General function prediction only	PREDICTED: transport inhibitor response 1-like protein-like [Cucumis sativus]
Csa7G019850	--	--	Cellular Component: cell wall (GO:0005618);;	--	--	--	--	Rare lipoprotein A (RlpA)-like double-psi beta-barrel	Uncharacterized protein OS=Glycine max (Soybean) PE=4 SV=1	R	General function prediction only	PREDICTED: expansin-like A1-like [Cucumis sativus]
Csa3G852530	--	--	Cellular Component: cell wall (GO:0005618);; Cellular Component: nucleus (GO:0005634);; Biological Process: regulation of transcription, DNA-templated (GO:0006355);; Molecular Function: transcription regulatory region DNA binding (GO:0044212);; Biological Process: integument development (GO:0080060);;	--	--	--	--	Myb-like DNA-binding domain	Putative uncharacterized protein GN=RCOM_1592640 OS=Ricinus communis (Castor bean) PE=4 SV=1	K	Transcription	PREDICTED: probable transcription factor KAN4-like [Cucumis sativus]
CsaUNG033810	[L]	Replication, recombination and repair	--	--	--	--	--	Phage integrase family	--	S	Function unknown	--
Csa5G488800	--	--	Cellular Component: plastid (GO:0009536);; Biological Process: cellular process (GO:0009987);;	--	--	--	--	--	Uncharacterized protein OS=Glycine max (Soybean) PE=4 SV=1	R	General function prediction only	PREDICTED: uncharacterized protein LOC101210443 [Cucumis sativus]
Csa2G200440	--	--	Cellular Component: nucleus (GO:0005634);; Biological Process: regulation of transcription, DNA-templated (GO:0006355);; Biological Process: auxin-activated signaling pathway (GO:0009734);; Molecular Function: protein dimerization activity (GO:0046983);;	K14484|1.29551e-136|csv:101229704|auxin-induced protein 22B-like; K14484 auxin-responsive protein IAA (A)	Plant hormone signal transduction (ko04075)	--	--	AUX/IAA family	Auxin-responsive protein IAA4, putative GN=RCOM_0909180 OS=Ricinus communis (Castor bean) PE=4 SV=1	K	Transcription	PREDICTED: auxin-induced protein 22B-like [Cucumis sativus]
Csa1G042860	--	--	Cellular Component: nucleus (GO:0005634);; Biological Process: intracellular protein transport (GO:0006886);; Biological Process: vacuolar transport (GO:0007034);; Cellular Component: retromer complex (GO:0030904);; Biological Process: retrograde transport, endosome to Golgi (GO:0042147);; Biological Process: photoperiodism, flowering (GO:0048573);;	--	--	[R]	General function prediction only	Vacuolar protein sorting-associated protein 26;; Arrestin (or S-antigen), N-terminal domain	Predicted protein GN=POPTRDRAFT_733107 OS=Populus trichocarpa (Western balsam poplar) PE=4 SV=1	R	General function prediction only	PREDICTED: Down syndrome critical region protein 3-like [Cucumis sativus]
Csa2G123070	--	--	Molecular Function: poly(ADP-ribose) glycohydrolase activity (GO:0004649);; Cellular Component: nucleus (GO:0005634);; Biological Process: response to stress (GO:0006950);; Biological Process: response to osmotic stress (GO:0006970);; Biological Process: response to oxidative stress (GO:0006979);; Biological Process: metabolic process (GO:0008152);; Biological Process: response to water deprivati…	K07759|1.87781e-70|csv:101223417|poly(ADP-ribose) glycohydrolase 1-like; K07759 poly(ADP-ribose) glycohydrolase [EC:3.2.1.143] (A)	--	[T]	Signal transduction mechanisms	--	Poly(ADP-ribose) glycohydrolase, putative GN=RCOM_0211520 OS=Ricinus communis (Castor bean) PE=4 SV=1	T	Signal transduction mechanisms	PREDICTED: poly(ADP-ribose) glycohydrolase 1-like [Cucumis sativus]
Csa2G369210	[O]	Posttranslational modification, protein turnover, chaperones	--	--	--	[O]	Posttranslational modification, protein turnover, chaperones	Ring finger domain;; RING-H2 zinc finger;; Zinc finger, C3HC4 type (RING finger);; Zinc finger, C3HC4 type (RING finger);; Zinc finger, C3HC4 type (RING finger);; zinc-RING finger domain;; Anaphase-promoting complex subunit 11 RING-H2 finger	Uncharacterized protein GN=MTR_3g099650 OS=Medicago truncatula (Barrel medic) PE=2 SV=1	O	Posttranslational modification, protein turnover, chaperones	PREDICTED: RING-H2 finger protein ATL11-like [Cucumis sativus]
Csa2G215480	[G]	Carbohydrate transport and metabolism	Molecular Function: magnesium ion binding (GO:0000287);; Molecular Function: pyruvate kinase activity (GO:0004743);; Molecular Function: ATP binding (GO:0005524);; Cellular Component: cytosol (GO:0005829);; Biological Process: glycolytic process (GO:0006096);; Cellular Component: chloroplast stroma (GO:0009570);; Biological Process: plant-type cell wall biogenesis (GO:0009832);; Biological Proces…	K00873|0|csv:101218017|pyruvate kinase isozyme A, chloroplastic-like; K00873 pyruvate kinase [EC:2.7.1.40] (A)	Glycolysis / Gluconeogenesis (ko00010);; Purine metabolism (ko00230);; Pyruvate metabolism (ko00620);; Carbon metabolism (ko01200);; Biosynthesis of amino acids (ko01230)	[G]	Carbohydrate transport and metabolism	Pyruvate kinase, barrel domain;; Pyruvate kinase, alpha/beta domain;; HpcH/HpaI aldolase/citrate lyase family	Pyruvate kinase GN=VIT_05s0020g04480 OS=Vitis vinifera (Grape) PE=3 SV=1	G	Carbohydrate transport and metabolism	PREDICTED: pyruvate kinase isozyme A, chloroplastic-like [Cucumis sativus]
Csa7G374710	--	--	--	--	--	[R]	General function prediction only	PPR repeat family;; PPR repeat;; PPR repeat;; Pentatricopeptide repeat domain	Putative uncharacterized protein GN=VIT_07s0141g00780 OS=Vitis vinifera (Grape) PE=4 SV=1	R	General function prediction only	PREDICTED: pentatricopeptide repeat-containing protein At3g22470, mitochondrial-like [Cucumis sativus]
Csa3G748800	[O]	Posttranslational modification, protein turnover, chaperones	Molecular Function: peroxidase activity (GO:0004601);; Cellular Component: plant-type cell wall (GO:0009505);; Cellular Component: chloroplast stroma (GO:0009570);; Cellular Component: thylakoid (GO:0009579);; Cellular Component: chloroplast envelope (GO:0009941);; Biological Process: defense response to bacterium (GO:0042742);; Molecular Function: peroxiredoxin activity (GO:0051920);; Biological…	--	--	[O]	Posttranslational modification, protein turnover, chaperones	Redoxin;; AhpC/TSA family	Uncharacterized protein OS=Medicago truncatula (Barrel medic) PE=2 SV=1	O	Posttranslational modification, protein turnover, chaperones	PREDICTED: peroxiredoxin-2E, chloroplastic-like [Cucumis sativus]
Csa5G600920	--	--	Biological Process: Group II intron splicing (GO:0000373);; Molecular Function: RNA binding (GO:0003723);; Cellular Component: chloroplast (GO:0009507);; Cellular Component: plastid (GO:0009536);;	--	--	--	--	CRS1 / YhbY (CRM) domain	RNA splicing factor OS=Cucumis melo subsp. melo PE=4 SV=1	A	RNA processing and modification	PREDICTED: LOW QUALITY PROTEIN: CRS2-associated factor 2, chloroplastic-like [Cucumis sativus]
Csa1G047450	[R]	General function prediction only	Molecular Function: enzyme activator activity (GO:0008047);; Molecular Function: quinolinate synthetase A activity (GO:0008987);; Biological Process: aerobic respiration (GO:0009060);; Biological Process: NAD biosynthetic process (GO:0009435);; Cellular Component: chloroplast (GO:0009507);; Biological Process: iron-sulfur cluster assembly (GO:0016226);; Biological Process: quinolinate biosyntheti…	K03517|0|csv:101208114|uncharacterized LOC101208114; K03517 quinolinate synthase [EC:2.5.1.72] (A)	Nicotinate and nicotinamide metabolism (ko00760)	--	--	Quinolinate synthetase A protein;; Fe-S metabolism associated domain	Uncharacterized protein GN=PRUPE_ppa001921mg OS=Prunus persica (Peach) PE=4 SV=1	H	Coenzyme transport and metabolism	PREDICTED: uncharacterized protein LOC101208114 [Cucumis sativus]
Csa3G033730	--	--	Cellular Component: plasma membrane (GO:0005886);; Biological Process: amino acid transport (GO:0006865);; Cellular Component: intracellular part (GO:0044424);;	--	--	--	--	Protein of unknown function (DUF1399)	Uncharacterized protein GN=PRUPE_ppa001356mg OS=Prunus persica (Peach) PE=4 SV=1	S	Function unknown	PREDICTED: uncharacterized protein LOC101219844 [Cucumis sativus]
Csa7G071350	[R]	General function prediction only	Molecular Function: GTP binding (GO:0005525);; Cellular Component: nucleus (GO:0005634);; Cellular Component: vacuolar membrane (GO:0005774);; Cellular Component: Golgi apparatus (GO:0005794);; Cellular Component: cytosol (GO:0005829);; Cellular Component: plasma membrane (GO:0005886);; Biological Process: phosphatidylinositol biosynthetic process (GO:0006661);; Biological Process: small GTPase m…	K07977|2.43094e-133|csv:101229186|ADP-ribosylation factor-like protein 8A-like; K07955 ADP-ribosylation factor-like protein 8 (A)	--	[R]	General function prediction only	ADP-ribosylation factor family;; Ras family;; Miro-like protein;; Gtr1/RagA G protein conserved region;; Signal recognition particle receptor beta subunit;; 50S ribosome-binding GTPase;; Elongation factor Tu GTP binding domain	Predicted protein GN=POPTRDRAFT_821296 OS=Populus trichocarpa (Western balsam poplar) PE=2 SV=1	U	Intracellular trafficking, secretion, and vesicular transport	PREDICTED: ADP-ribosylation factor-like protein 8A-like [Cucumis sativus]
Csa6G538730	--	--	--	--	--	--	--	Zinc finger, C3HC4 type (RING finger)	Uncharacterized protein OS=Glycine max (Soybean) PE=4 SV=1	O	Posttranslational modification, protein turnover, chaperones	PREDICTED: uncharacterized protein LOC101206495 [Cucumis sativus]
Csa3G422290	[C]	Energy production and conversion	Molecular Function: copper ion binding (GO:0005507);; Cellular Component: mitochondrion (GO:0005739);; Cellular Component: mitochondrial matrix (GO:0005759);; Molecular Function: electron carrier activity (GO:0009055);; Biological Process: electron transport chain (GO:0022900);; Molecular Function: flavin adenine dinucleotide binding (GO:0050660);;	K03522|6.02094e-127|csv:101217942|electron transfer flavoprotein subunit alpha, mitochondrial-like; K03522 electron transfer flavoprotein alpha subunit (A)	--	[C]	Energy production and conversion	Electron transfer flavoprotein FAD-binding domain	Electron transport oxidoreductase, putative GN=RCOM_0185020 OS=Ricinus communis (Castor bean) PE=4 SV=1	C	Energy production and conversion	PREDICTED: electron transfer flavoprotein subunit alpha, mitochondrial-like [Cucumis sativus]
Csa4G179100	--	--	Molecular Function: nucleic acid binding (GO:0003676);; Molecular Function: zinc ion binding (GO:0008270);;	--	--	--	--	MuDR family transposase;; MULE transposase domain;; SWIM zinc finger;; Transposase, Mutator family	Putative uncharacterized protein GN=VIT_03s0088g01070 OS=Vitis vinifera (Grape) PE=4 SV=1	S	Function unknown	PREDICTED: uncharacterized protein LOC101204073 [Cucumis sativus]
Csa3G131930	[J]	Translation, ribosomal structure and biogenesis	Biological Process: RNA methylation (GO:0001510);; Molecular Function: structural constituent of ribosome (GO:0003735);; Cellular Component: nucleolus (GO:0005730);; Biological Process: translation (GO:0006412);; Cellular Component: chloroplast (GO:0009507);; Biological Process: plant-type cell wall organization (GO:0009664);; Cellular Component: membrane (GO:0016020);; Cellular Component: cytoso…	K02872|1.83782e-138|csv:101213484|60S ribosomal protein L13a-2-like; K02872 large subunit ribosomal protein L13Ae (A)	Ribosome (ko03010)	[J]	Translation, ribosomal structure and biogenesis	Ribosomal protein L13	60S ribosomal protein L13a, putative GN=RCOM_1019840 OS=Ricinus communis (Castor bean) PE=3 SV=1	J	Translation, ribosomal structure and biogenesis	PREDICTED: 60S ribosomal protein L13a-2-like [Cucumis sativus]
Csa3G408550	--	--	Biological Process: developmental process involved in reproduction (GO:0003006);; Cellular Component: cell wall (GO:0005618);; Cellular Component: phragmoplast (GO:0009524);; Biological Process: anatomical structure morphogenesis (GO:0009653);; Biological Process: endosperm development (GO:0009960);; Biological Process: actin filament polymerization (GO:0030041);; Biological Process: multicellula…	--	--	[TZ]	Signal transduction mechanisms;; Cytoskeleton	Formin Homology 2 Domain	Uncharacterized protein GN=PRUPE_ppa000983mg OS=Prunus persica (Peach) PE=4 SV=1	TZ	Signal transduction mechanisms;; Cytoskeleton	PREDICTED: uncharacterized protein LOC101213072 [Cucumis sativus]
Csa6G095880	--	--	Cellular Component: exocyst (GO:0000145);; Cellular Component: mitochondrion (GO:0005739);; Cellular Component: Golgi apparatus (GO:0005794);; Cellular Component: cytosol (GO:0005829);; Biological Process: exocytosis (GO:0006887);; Biological Process: membrane fusion (GO:0006944);; Biological Process: Golgi vesicle transport (GO:0048193);; Biological Process: vesicle docking (GO:0048278);;	--	--	[U]	Intracellular trafficking, secretion, and vesicular transport	COG4 transport protein	Putative COG transport protein GN=ARAX_ADH18B08-014 OS=Arachis duranensis PE=4 SV=1	U	Intracellular trafficking, secretion, and vesicular transport	PREDICTED: conserved oligomeric Golgi complex subunit 4-like [Cucumis sativus]
Csa5G485190	--	--	Biological Process: response to molecule of bacterial origin (GO:0002237);; Cellular Component: endosome (GO:0005768);; Cellular Component: Golgi apparatus (GO:0005794);; Cellular Component: trans-Golgi network (GO:0005802);; Cellular Component: plasma membrane (GO:0005886);; Biological Process: signal transduction (GO:0007165);; Biological Process: stomatal complex morphogenesis (GO:0010103);; M…	--	--	[R]	General function prediction only	Leucine Rich repeats (2 copies);; Leucine Rich Repeat;; Leucine rich repeat;; Leucine Rich repeat;; Leucine rich repeat;; Leucine rich repeat N-terminal domain	Uncharacterized protein OS=Glycine max (Soybean) PE=4 SV=1	R	General function prediction only	PREDICTED: probable leucine-rich repeat receptor-like protein kinase At1g35710-like [Cucumis sativus]
Csa6G128610	--	--	Cellular Component: nucleosome (GO:0000786);; Molecular Function: DNA binding (GO:0003677);; Molecular Function: structural constituent of ribosome (GO:0003735);; Molecular Function: protein serine/threonine kinase activity (GO:0004674);; Molecular Function: ATP binding (GO:0005524);; Cellular Component: ribosome (GO:0005840);; Biological Process: nucleosome assembly (GO:0006334);; Biological Pro…	--	--	--	--	--	Uncharacterized protein GN=PGSC0003DMG400046004 OS=Solanum tuberosum (Potato) PE=4 SV=1	K	Transcription	PREDICTED: LOW QUALITY PROTEIN: ethylene-responsive transcription factor ERF054-like [Cucumis sativus]
Csa1G524760	[T]	Signal transduction mechanisms	Molecular Function: phosphoprotein phosphatase activity (GO:0004721);; Biological Process: response to stress (GO:0006950);; Biological Process: response to abiotic stimulus (GO:0009628);; Biological Process: response to abscisic acid (GO:0009737);; Molecular Function: hydrolase activity (GO:0016787);; Biological Process: single-organism cellular process (GO:0044763);; Biological Process: regulat…	K14497|0|csv:101226308|protein phosphatase 2C 3-like; K14497 protein phosphatase 2C [EC:3.1.3.16] (A)	Plant hormone signal transduction (ko04075)	[T]	Signal transduction mechanisms	Protein phosphatase 2C;; Protein phosphatase 2C	Uncharacterized protein GN=PRUPE_ppa006696mg OS=Prunus persica (Peach) PE=4 SV=1	T	Signal transduction mechanisms	PREDICTED: protein phosphatase 2C 3-like [Cucumis sativus]
Csa6G496440	--	--	Cellular Component: Golgi membrane (GO:0000139);; Cellular Component: endosome (GO:0005768);; Cellular Component: vacuolar membrane (GO:0005774);; Cellular Component: trans-Golgi network (GO:0005802);; Cellular Component: plasma membrane (GO:0005886);; Cellular Component: chloroplast thylakoid membrane (GO:0009535);; Biological Process: homogalacturonan metabolic process (GO:0010394);; Biological…	--	--	--	--	--	Uncharacterized protein GN=PRUPE_ppa010197mg OS=Prunus persica (Peach) PE=4 SV=1	S	Function unknown	PREDICTED: uncharacterized protein At3g49720-like isoform 2 [Cucumis sativus]
Csa2G429070	--	--	Molecular Function: alcohol O-acetyltransferase activity (GO:0004026);;	--	--	--	--	Transferase family	Putative acyltransferase GN=AT2 OS=Cucumis melo (Muskmelon) PE=2 SV=1	R	General function prediction only	PREDICTED: benzyl alcohol O-benzoyltransferase-like [Cucumis sativus]
Csa3G733920	[E]	Amino acid transport and metabolism	Molecular Function: glutamate 5-kinase activity (GO:0004349);; Molecular Function: glutamate-5-semialdehyde dehydrogenase activity (GO:0004350);; Biological Process: proline biosynthetic process (GO:0006561);; Biological Process: response to oxidative stress (GO:0006979);; Biological Process: response to desiccation (GO:0009269);; Cellular Component: chloroplast (GO:0009507);; Biological Process:…	K12657|0|csv:101228765|delta-1-pyrroline-5-carboxylate synthase-like; K12657 delta-1-pyrroline-5-carboxylate synthetase [EC:2.7.2.11 1.2.1.41] (A)	Arginine and proline metabolism (ko00330);; Biosynthesis of amino acids (ko01230)	[E]	Amino acid transport and metabolism	Amino acid kinase family;; Aldehyde dehydrogenase family	Uncharacterized protein OS=Glycine max (Soybean) PE=4 SV=2	E	Amino acid transport and metabolism	PREDICTED: delta-1-pyrroline-5-carboxylate synthase-like [Cucumis sativus]
Csa6G397700	--	--	Molecular Function: DNA binding (GO:0003677);; Molecular Function: transcription cofactor activity (GO:0003712);; Cellular Component: plastid (GO:0009536);; Biological Process: embryo development (GO:0009790);; Biological Process: regulation of flower development (GO:0009909);; Biological Process: hydrogen peroxide catabolic process (GO:0042744);; Molecular Function: protein heterodimerization ac…	--	--	--	--	LIM-domain binding protein	Predicted protein GN=POPTRDRAFT_551368 OS=Populus trichocarpa (Western balsam poplar) PE=4 SV=1	S	Function unknown	PREDICTED: transcriptional corepressor SEUSS-like [Cucumis sativus]
Csa3G131900	--	--	Cellular Component: cytoplasmic membrane-bounded vesicle (GO:0016023);; Molecular Function: hydrolase activity (GO:0016787);;	K01376|3.55374e-12|crb:CARUB_v10006494mg|hypothetical protein; K01376 [EC:3.4.22.-] (A)	--	[O]	Posttranslational modification, protein turnover, chaperones	Papain family cysteine protease	Cysteine protease, putative GN=RCOM_0554360 OS=Ricinus communis (Castor bean) PE=3 SV=1	O	Posttranslational modification, protein turnover, chaperones	cysteine protease, putative [Ricinus communis]
Csa3G651760	[S]	Function unknown	Molecular Function: binding (GO:0005488);; Biological Process: phosphate-containing compound metabolic process (GO:0006796);; Biological Process: defense response (GO:0006952);; Biological Process: signal transduction (GO:0007165);; Biological Process: response to hormone (GO:0009725);; Cellular Component: membrane (GO:0016020);; Cellular Component: cytoplasmic membrane-bounded vesicle (GO:001602…	--	--	--	--	Protein kinase domain;; Protein tyrosine kinase;; Leucine Rich repeats (2 copies);; Leucine Rich Repeat;; Leucine rich repeat;; Leucine Rich repeat;; Leucine rich repeat N-terminal domain;; Leucine rich repeat	Putative uncharacterized protein GN=VIT_09s0018g01900 OS=Vitis vinifera (Grape) PE=4 SV=1	T	Signal transduction mechanisms	PREDICTED: receptor-like protein kinase-like [Cucumis sativus]
Csa2G295420	--	--	Cellular Component: chloroplast (GO:0009507);;	--	--	[R]	General function prediction only	Protein of unknown function, DUF607	Uncharacterized protein GN=PRUPE_ppa006923mg OS=Prunus persica (Peach) PE=4 SV=1	S	Function unknown	PREDICTED: pentatricopeptide repeat-containing protein At2g01390-like [Cucumis sativus]
Csa1G703070	--	--	Cellular Component: plastid (GO:0009536);;	--	--	--	--	Phloem protein 2	Uncharacterized protein GN=MTR_4g083970 OS=Medicago truncatula (Barrel medic) PE=2 SV=1	R	General function prediction only	PREDICTED: protein PHLOEM PROTEIN 2-LIKE A1-like [Cucumis sativus]
Csa4G430860	--	--	Cellular Component: mitochondrion (GO:0005739);; Cellular Component: endosome (GO:0005768);; Cellular Component: Golgi apparatus (GO:0005794);; Cellular Component: trans-Golgi network (GO:0005802);; Cellular Component: chloroplast (GO:0009507);; Biological Process: virus induced gene silencing (GO:0009616);; Biological Process: vegetative phase change (GO:0010050);; Molecular Function: transferas…	--	--	--	--	--	Putative uncharacterized protein GN=RCOM_0692440 OS=Ricinus communis (Castor bean) PE=4 SV=1	S	Function unknown	PREDICTED: uncharacterized protein LOC101219097 [Cucumis sativus]
Csa6G080390	[O]	Posttranslational modification, protein turnover, chaperones	Biological Process: protein folding (GO:0006457);; Biological Process: tryptophan catabolic process (GO:0006569);; Cellular Component: chloroplast stroma (GO:0009570);; Biological Process: indoleacetic acid biosynthetic process (GO:0009684);; Cellular Component: chloroplast envelope (GO:0009941);; Biological Process: carboxylic acid metabolic process (GO:0019752);; Biological Process: indole-cont…	K04078|1.5879e-91|csv:101209246|10 kDa chaperonin-like; K04078 chaperonin GroES (A)	--	[O]	Posttranslational modification, protein turnover, chaperones	Chaperonin 10 Kd subunit	Chloroplast chaperonin OS=Cucumis melo subsp. melo PE=4 SV=1	O	Posttranslational modification, protein turnover, chaperones	PREDICTED: 10 kDa chaperonin-like [Cucumis sativus]
Csa3G824990	--	--	--	--	--	--	--	No apical meristem (NAM) protein	NAC domain protein GN=NAC4 OS=Tamarix hispida PE=2 SV=1	S	Function unknown	PREDICTED: NAC domain-containing protein 100-like [Cucumis sativus]
Csa1G077740	[RTKL]	General function prediction only;; Signal transduction mechanisms;; Transcription;; Replication, recombination and repair	Molecular Function: protein serine/threonine kinase activity (GO:0004674);; Molecular Function: non-membrane spanning protein tyrosine kinase activity (GO:0004715);; Molecular Function: ATP binding (GO:0005524);; Cellular Component: nucleus (GO:0005634);; Cellular Component: plasma membrane (GO:0005886);; Biological Process: protein phosphorylation (GO:0006468);;	K04733|0|csv:101229566|probable serine/threonine-protein kinase RLCKVII-like; K04733 interleukin-1 receptor-associated kinase 4 [EC:2.7.11.1] (A)	--	[T]	Signal transduction mechanisms	Protein kinase domain;; Protein tyrosine kinase	Uncharacterized protein OS=Glycine max (Soybean) PE=3 SV=1	T	Signal transduction mechanisms	PREDICTED: probable serine/threonine-protein kinase RLCKVII-like [Cucumis sativus]
Csa4G456680	[RTKL]	General function prediction only;; Signal transduction mechanisms;; Transcription;; Replication, recombination and repair	Molecular Function: protein serine/threonine kinase activity (GO:0004674);; Molecular Function: ATP binding (GO:0005524);; Cellular Component: nucleus (GO:0005634);; Cellular Component: cytosol (GO:0005829);; Biological Process: protein phosphorylation (GO:0006468);; Biological Process: response to salt stress (GO:0009651);; Biological Process: abscisic acid-activated signaling pathway (GO:000973…	K14498|1.05438e-46|cmo:103486039|serine/threonine-protein kinase SRK2J-like; K14498 serine/threonine-protein kinase SRK2 [EC:2.7.11.1] (A)	Plant hormone signal transduction (ko04075)	[T]	Signal transduction mechanisms	Protein kinase domain;; Protein tyrosine kinase	Uncharacterized protein GN=PGSC0003DMG400030830 OS=Solanum tuberosum (Potato) PE=4 SV=1	T	Signal transduction mechanisms	PREDICTED: serine/threonine-protein kinase SRK2A-like [Cucumis sativus]
Csa3G892760	--	--	Cellular Component: plasma membrane (GO:0005886);; Biological Process: carbohydrate metabolic process (GO:0005975);; Molecular Function: lyase activity (GO:0016829);; Molecular Function: carbohydrate binding (GO:0030246);;	K18195|0|cmo:103503645|probable rhamnogalacturonate lyase C; K18195 rhamnogalacturonan endolyase [EC:4.2.2.23] (A)	--	--	--	Rhamnogalacturonate lyase family;; Polysaccharide lyase family 4, domain III;; Polysaccharide lyase family 4, domain II	Uncharacterized protein OS=Glycine max (Soybean) PE=4 SV=1	S	Function unknown	PREDICTED: rhamnogalacturonate lyase-like [Cucumis sativus]
Csa1G002850	--	--	Cellular Component: nucleus (GO:0005634);; Biological Process: phosphatidylinositol biosynthetic process (GO:0006661);;	K15360|7.61942e-72|csv:101230353|centromere protein X-like; K15360 centromere protein X (A)	--	--	--	CENP-S associating Centromere protein X	Putative uncharacterized protein GN=VIT_17s0000g09720 OS=Vitis vinifera (Grape) PE=4 SV=1	S	Function unknown	PREDICTED: centromere protein X-like [Cucumis sativus]
Csa3G190380	[P]	Inorganic ion transport and metabolism	Molecular Function: nucleotide binding (GO:0000166);; Molecular Function: monooxygenase activity (GO:0004497);; Biological Process: metabolic process (GO:0008152);; Molecular Function: coenzyme binding (GO:0050662);;	K11816|0|cmo:103500125|probable indole-3-pyruvate monooxygenase YUCCA10; K11816 indole-3-pyruvate monooxygenase [EC:1.14.13.168] (A)	Tryptophan metabolism (ko00380)	[Q]	Secondary metabolites biosynthesis, transport and catabolism	Flavin-binding monooxygenase-like;; Pyridine nucleotide-disulphide oxidoreductase;; L-lysine 6-monooxygenase (NADPH-requiring);; Pyridine nucleotide-disulphide oxidoreductase;; FAD binding domain;; FAD-NAD(P)-binding;; Pyridine nucleotide-disulphide oxidoreductase;; Thi4 family;; FAD binding domain	Uncharacterized protein OS=Glycine max (Soybean) PE=4 SV=1	Q	Secondary metabolites biosynthesis, transport and catabolism	PREDICTED: flavin-containing monooxygenase YUCCA10-like, partial [Cucumis sativus]
Csa1G532320	[U]	Intracellular trafficking, secretion, and vesicular transport	Biological Process: protein import into nucleus, translocation (GO:0000060);; Cellular Component: nucleus (GO:0005634);; Molecular Function: Ran GTPase binding (GO:0008536);; Biological Process: intracellular transport (GO:0046907);;	K15306|5.58133e-128|cmo:103497065|ran-binding protein 1 homolog a-like; K15306 Ran-binding protein 1 (A)	--	[U]	Intracellular trafficking, secretion, and vesicular transport	RanBP1 domain;; WH1 domain	Ran-binding protein 1 OS=Cucumis melo var. cantalupensis (Netted muskmelon) PE=1 SV=1	U	Intracellular trafficking, secretion, and vesicular transport	PREDICTED: LOW QUALITY PROTEIN: ran-binding protein 1 homolog c-like [Cucumis sativus]
Csa5G594470	--	--	Biological Process: defense response (GO:0006952);; Molecular Function: oxidoreductase activity (GO:0016491);; Molecular Function: oxidoreductase activity, acting on paired donors, with incorporation or reduction of molecular oxygen, NAD(P)H as one donor, and incorporation of one atom of oxygen (GO:0016709);; Biological Process: indole-containing compound biosynthetic process (GO:0042435);; Biolo…	--	--	[Q]	Secondary metabolites biosynthesis, transport and catabolism	--	Cytochrome P450 OS=Papaver somniferum (Opium poppy) PE=2 SV=1	Q	Secondary metabolites biosynthesis, transport and catabolism	PREDICTED: cytochrome P450 71B34-like [Cucumis sativus]
Csa6G446420	[O]	Posttranslational modification, protein turnover, chaperones	Molecular Function: ATP binding (GO:0005524);; Cellular Component: nucleoplasm (GO:0005654);; Cellular Component: nucleolus (GO:0005730);; Cellular Component: Golgi apparatus (GO:0005794);; Cellular Component: cytosol (GO:0005829);; Cellular Component: plasma membrane (GO:0005886);; Molecular Function: microtubule-severing ATPase activity (GO:0008568);; Biological Process: positive regulation of …	K13525|0|csv:101220994|cell division cycle protein 48 homolog; K13525 transitional endoplasmic reticulum ATPase (A)	Protein processing in endoplasmic reticulum (ko04141)	[O]	Posttranslational modification, protein turnover, chaperones	ATPase family associated with various cellular activities (AAA);; Cell division protein 48 (CDC48), N-terminal domain;; AAA domain;; Holliday junction DNA helicase ruvB N-terminus;; AAA ATPase domain;; AAA domain;; AAA domain (Cdc48 subfamily);; AAA domain;; AAA domain (dynein-related subfamily);; Cell division protein 48 (CDC48), domain 2;; AAA domain;; Zeta toxin;; AAA domain;; TIP49 C-terminus…	Putative uncharacterized protein GN=VIT_08s0040g01480 OS=Vitis vinifera (Grape) PE=1 SV=1	O	Posttranslational modification, protein turnover, chaperones	PREDICTED: cell division cycle protein 48 homolog [Cucumis sativus]
Csa2G404870	[R]	General function prediction only	Cellular Component: Golgi apparatus (GO:0005794);; Biological Process: glutamine metabolic process (GO:0006541);; Molecular Function: hydrolase activity (GO:0016787);;	--	--	--	--	Peptidase C26;; Glutamine amidotransferase class-I	Putative uncharacterized protein GN=VIT_14s0006g02590 OS=Vitis vinifera (Grape) PE=4 SV=1	R	General function prediction only	PREDICTED: LOW QUALITY PROTEIN: putative glutamine amidotransferase-like protein RP404-like [Cucumis sativus]
Csa6G428000	[D]	Cell cycle control, cell division, chromosome partitioning	Biological Process: regulation of cyclin-dependent protein serine/threonine kinase activity (GO:0000079);; Cellular Component: nucleus (GO:0005634);; Molecular Function: protein kinase binding (GO:0019901);; Biological Process: cell division (GO:0051301);; Biological Process: regulation of cell cycle (GO:0051726);;	K05868|0|csv:101222873|G2/mitotic-specific cyclin S13-6-like; K05868 cyclin B (A)	--	[D]	Cell cycle control, cell division, chromosome partitioning	Cyclin, N-terminal domain;; Cyclin, C-terminal domain	Cyclin B GN=cycb OS=Camellia sinensis (Tea) PE=2 SV=1	D	Cell cycle control, cell division, chromosome partitioning	PREDICTED: G2/mitotic-specific cyclin S13-6-like [Cucumis sativus]
Csa1G042400	--	--	--	--	--	--	--	--	Putative uncharacterized protein GN=RCOM_1197780 OS=Ricinus communis (Castor bean) PE=4 SV=1	S	Function unknown	PREDICTED: uncharacterized protein LOC100266297 [Vitis vinifera]
Csa3G782700	[R]	General function prediction only	Molecular Function: nucleotide binding (GO:0000166);; Molecular Function: RNA binding (GO:0003723);; Cellular Component: chloroplast stroma (GO:0009570);; Cellular Component: thylakoid (GO:0009579);; Biological Process: embryo development ending in seed dormancy (GO:0009793);; Biological Process: thylakoid membrane organization (GO:0010027);; Biological Process: vegetative to reproductive phase t…	--	--	[R]	General function prediction only	RNA recognition motif. (a.k.a. RRM, RBD, or RNP domain);; RNA recognition motif (a.k.a. RRM, RBD, or RNP domain);; RNA recognition motif. (a.k.a. RRM, RBD, or RNP domain)	Putative uncharacterized protein GN=VITISV_002607 OS=Vitis vinifera (Grape) PE=2 SV=1	A	RNA processing and modification	PREDICTED: 33 kDa ribonucleoprotein, chloroplastic-like [Cucumis sativus]
Csa2G408390	--	--	--	--	--	--	--	--	Uncharacterized protein OS=Glycine max (Soybean) PE=4 SV=1	S	Function unknown	PREDICTED: uncharacterized protein LOC100788648 isoform 1 [Glycine max]
Csa3G168950	[R]	General function prediction only	Molecular Function: nucleic acid binding (GO:0003676);; Molecular Function: ATP binding (GO:0005524);; Cellular Component: nucleolus (GO:0005730);; Cellular Component: mitochondrion (GO:0005739);; Cellular Component: cytosol (GO:0005829);; Biological Process: DNA metabolic process (GO:0006259);; Biological Process: meiotic nuclear division (GO:0007126);; Molecular Function: ATP-dependent helicase…	K12854|0|csv:101222342|SNRNP200; small nuclear ribonucleoprotein 200kDa (U5); K12854 pre-mRNA-splicing helicase BRR2 [EC:3.6.4.13] (A)	Spliceosome (ko03040)	[A]	RNA processing and modification	Sec63 Brl domain;; DEAD/DEAH box helicase;; Type III restriction enzyme, res subunit;; Helicase conserved C-terminal domain;; AAA domain;; PhoH-like protein	Uncharacterized protein GN=PRUPE_ppa000042mg OS=Prunus persica (Peach) PE=4 SV=1	A	RNA processing and modification	PREDICTED: U5 small nuclear ribonucleoprotein 200 kDa helicase-like [Cucumis sativus]
Csa3G734210	--	--	Cellular Component: condensed chromosome (GO:0000793);; Molecular Function: DNA binding (GO:0003677);; Molecular Function: chromatin binding (GO:0003682);; Molecular Function: sequence-specific DNA binding transcription factor activity (GO:0003700);; Cellular Component: nucleolus (GO:0005730);; Biological Process: asymmetric cell division (GO:0008356);; Biological Process: response to virus (GO:0…	K09422|2.93798e-119|csv:101226728|transcription factor AS1-like; K09422 myb proto-oncogene protein, plant (A)	--	[K]	Transcription	--	Myb family transcription factor OS=Castanea mollissima (Chinese chestnut) PE=2 SV=1	K	Transcription	PREDICTED: transcription factor AS1-like [Cucumis sativus]
Csa6G008580	--	--	Cellular Component: nucleus (GO:0005634);; Biological Process: organ growth (GO:0035265);; Biological Process: protein complex disassembly (GO:0043241);;	K15627|1.06596e-152|csv:101217813|tether containing UBX domain for GLUT4-like; K15627 tether containing UBX domain for GLUT4 (A)	--	[O]	Posttranslational modification, protein turnover, chaperones	UBX domain	Uncharacterized protein OS=Glycine max (Soybean) PE=4 SV=1	O	Posttranslational modification, protein turnover, chaperones	PREDICTED: tether containing UBX domain for GLUT4-like isoform 1 [Cucumis sativus]
Csa1G588500	--	--	Molecular Function: beta-galactosidase activity (GO:0004565);; Cellular Component: cell wall (GO:0005618);; Biological Process: carbohydrate metabolic process (GO:0005975);; Molecular Function: carbohydrate binding (GO:0030246);; Cellular Component: apoplast (GO:0048046);;	--	--	[G]	Carbohydrate transport and metabolism	--	Beta-galactosidase OS=Momordica charantia (Bitter gourd) PE=2 SV=1	G	Carbohydrate transport and metabolism	PREDICTED: beta-galactosidase-like [Cucumis sativus]
Csa3G595210	--	--	Cellular Component: plasma membrane (GO:0005886);; Cellular Component: chloroplast (GO:0009507);;	--	--	--	--	--	Uncharacterized protein GN=PRUPE_ppa003235mg OS=Prunus persica (Peach) PE=4 SV=1	S	Function unknown	PREDICTED: uncharacterized membrane protein At3g27390-like [Cucumis sativus]
Csa2G372880	--	--	--	--	--	--	--	--	--	--	--	PREDICTED: 40S ribosomal protein S5-1-like [Cucumis sativus]
Csa4G291920	--	--	Cellular Component: chloroplast stroma (GO:0009570);; Molecular Function: protein binding involved in protein folding (GO:0044183);; Biological Process: chaperone-mediated protein folding (GO:0061077);;	--	--	--	--	RbcX protein	Predicted protein (Fragment) GN=POPTRDRAFT_172929 OS=Populus trichocarpa (Western balsam poplar) PE=4 SV=1	S	Function unknown	PREDICTED: uncharacterized protein LOC101203881 [Cucumis sativus]
Csa5G616350	--	--	Cellular Component: chloroplast (GO:0009507);; Cellular Component: chloroplast thylakoid membrane (GO:0009535);; Cellular Component: chloroplast outer membrane (GO:0009707);;	--	--	--	--	--	Putative uncharacterized protein GN=VIT_13s0074g00230 OS=Vitis vinifera (Grape) PE=4 SV=1	--	--	PREDICTED: uncharacterized LOC101213355 [Cucumis sativus]
Csa2G236620	[RTKL]	General function prediction only;; Signal transduction mechanisms;; Transcription;; Replication, recombination and repair	Molecular Function: protein tyrosine kinase activity (GO:0004713);; Molecular Function: protein binding (GO:0005515);; Molecular Function: ATP binding (GO:0005524);; Cellular Component: nucleus (GO:0005634);; Cellular Component: cytosol (GO:0005829);; Biological Process: sucrose metabolic process (GO:0005985);; Biological Process: protein phosphorylation (GO:0006468);; Biological Process: unsatur…	K14498|0|csv:101207512|serine/threonine-protein kinase SRK2E-like; K14498 serine/threonine-protein kinase SRK2 [EC:2.7.11.1] (A)	Plant hormone signal transduction (ko04075)	[T]	Signal transduction mechanisms	Protein kinase domain;; Protein tyrosine kinase	Serine/threonine-protein kinase SAPK10, putative GN=RCOM_0774030 OS=Ricinus communis (Castor bean) PE=4 SV=1	T	Signal transduction mechanisms	PREDICTED: serine/threonine-protein kinase SRK2E-like [Cucumis sativus]
Csa3G127120	--	--	--	--	--	--	--	U-box domain;; Zinc-finger of the MIZ type in Nse subunit	Uncharacterized protein GN=PGSC0003DMG400001821 OS=Solanum tuberosum (Potato) PE=4 SV=1	R	General function prediction only	PREDICTED: E3 ubiquitin-protein ligase PUB23-like [Cucumis sativus]
Csa5G583300	[G]	Carbohydrate transport and metabolism	Biological Process: metabolic process (GO:0008152);; Molecular Function: 2-dehydro-3-deoxy-phosphogluconate aldolase activity (GO:0008675);; Cellular Component: plastid (GO:0009536);;	--	--	--	--	KDPG and KHG aldolase	Uncharacterized protein GN=Solyc10g081280.1 OS=Solanum lycopersicum (Tomato) PE=4 SV=1	S	Function unknown	PREDICTED: putative KHG/KDPG aldolase-like [Cucumis sativus]
Csa4G005010	--	--	--	--	--	--	--	--	Uncharacterized protein OS=Glycine max (Soybean) PE=4 SV=1	S	Function unknown	PREDICTED: EPIDERMAL PATTERNING FACTOR-like protein 8-like [Cucumis sativus]
Csa3G146440	[LKJ]	Replication, recombination and repair;; Transcription;; Translation, ribosomal structure and biogenesis	Molecular Function: nucleic acid binding (GO:0003676);; Molecular Function: ATP-dependent RNA helicase activity (GO:0004004);; Molecular Function: ATP binding (GO:0005524);; Cellular Component: mitochondrion (GO:0005739);; Biological Process: pollen development (GO:0009555);; Biological Process: megagametogenesis (GO:0009561);; Biological Process: RNA metabolic process (GO:0016070);;	K17675|0|csv:101204337|ATP-dependent RNA helicase SUPV3L1, mitochondrial-like; K17675 ATP-dependent RNA helicase SUPV3L1/SUV3 [EC:3.6.4.13] (A)	--	[A]	RNA processing and modification	Mitochondrial degradasome RNA helicase subunit C terminal;; Helicase conserved C-terminal domain	Uncharacterized protein OS=Glycine max (Soybean) PE=4 SV=2	A	RNA processing and modification	PREDICTED: ATP-dependent RNA helicase SUPV3L1, mitochondrial-like [Cucumis sativus]
Csa7G290500	[J]	Translation, ribosomal structure and biogenesis	Molecular Function: ribonuclease P activity (GO:0004526);; Cellular Component: nucleus (GO:0005634);; Cellular Component: vacuole (GO:0005773);; Biological Process: tRNA processing (GO:0008033);; Biological Process: embryo development ending in seed dormancy (GO:0009793);; Molecular Function: ligase activity (GO:0016874);; Molecular Function: 2-alkenal reductase [NAD(P)] activity (GO:0032440);; B…	K03537|8.3498e-98|csv:101220274|probable ribonuclease P/MRP protein subunit POP5-like; K03537 ribonuclease P/MRP protein subunit POP5 [EC:3.1.26.5] (A)	Ribosome biogenesis in eukaryotes (ko03008);; RNA transport (ko03013)	[J]	Translation, ribosomal structure and biogenesis	Rpp14/Pop5 family	Predicted protein GN=POPTRDRAFT_740697 OS=Populus trichocarpa (Western balsam poplar) PE=4 SV=1	J	Translation, ribosomal structure and biogenesis	PREDICTED: probable ribonuclease P/MRP protein subunit POP5-like [Cucumis sativus]
Csa5G600370	[RTKL]	General function prediction only;; Signal transduction mechanisms;; Transcription;; Replication, recombination and repair	Molecular Function: protein serine/threonine kinase activity (GO:0004674);; Molecular Function: non-membrane spanning protein tyrosine kinase activity (GO:0004715);; Molecular Function: calcium-dependent protein serine/threonine phosphatase activity (GO:0004723);; Molecular Function: calcium ion binding (GO:0005509);; Molecular Function: calmodulin binding (GO:0005516);; Molecular Function: ATP b…	--	--	--	--	Protein kinase domain;; Salt stress response/antifungal;; Protein tyrosine kinase	Kinase, putative GN=RCOM_0023850 OS=Ricinus communis (Castor bean) PE=3 SV=1	T	Signal transduction mechanisms	PREDICTED: cysteine-rich receptor-like protein kinase 3-like [Cucumis sativus]
Csa2G000960	--	--	--	--	--	--	--	Cotton fibre expressed protein	Putative uncharacterized protein GN=RCOM_1050200 OS=Ricinus communis (Castor bean) PE=4 SV=1	S	Function unknown	PREDICTED: uncharacterized protein LOC101210555 [Cucumis sativus]
Csa7G239050	[G]	Carbohydrate transport and metabolism	Molecular Function: glyceraldehyde-3-phosphate dehydrogenase (NAD+) (phosphorylating) activity (GO:0004365);; Molecular Function: copper ion binding (GO:0005507);; Biological Process: glycolytic process (GO:0006096);; Molecular Function: zinc ion binding (GO:0008270);; Cellular Component: chloroplast (GO:0009507);; Cellular Component: plastid (GO:0009536);; Biological Process: pollen development …	K00134|0|csv:101228854|glyceraldehyde-3-phosphate dehydrogenase, cytosolic-like; K00134 glyceraldehyde 3-phosphate dehydrogenase [EC:1.2.1.12] (A)	Glycolysis / Gluconeogenesis (ko00010);; Carbon fixation in photosynthetic organisms (ko00710);; Carbon metabolism (ko01200);; Biosynthesis of amino acids (ko01230)	[G]	Carbohydrate transport and metabolism	Glyceraldehyde 3-phosphate dehydrogenase, C-terminal domain;; Glyceraldehyde 3-phosphate dehydrogenase, NAD binding domain	Putative uncharacterized protein GN=VIT_19s0085g00600 OS=Vitis vinifera (Grape) PE=3 SV=1	G	Carbohydrate transport and metabolism	PREDICTED: glyceraldehyde-3-phosphate dehydrogenase, cytosolic-like [Cucumis sativus]
Csa3G210480	--	--	--	--	--	--	--	Ankyrin repeats (many copies)	ENOD2 (Fragment) GN=ENOD2 OS=Cladrastis kentukea (Yellow wood) PE=2 SV=1	S	Function unknown	PREDICTED: uncharacterized protein LOC101222158 [Cucumis sativus]
Csa1G042770	--	--	Biological Process: cellular process (GO:0009987);; Biological Process: vesicle-mediated transport (GO:0016192);;	K12483|2.11064e-43|csv:101214261|EH domain-containing protein 1-like; K12483 EH domain-containing protein 1 (A)	Endocytosis (ko04144)	--	--	--	Uncharacterized protein OS=Glycine max (Soybean) PE=4 SV=1	TU	Signal transduction mechanisms;; Intracellular trafficking, secretion, and vesicular transport	PREDICTED: EH domain-containing protein 1-like [Cucumis sativus]
Csa1G467080	--	--	Cellular Component: chloroplast (GO:0009507);;	--	--	--	--	--	Predicted protein (Fragment) GN=POPTRDRAFT_234686 OS=Populus trichocarpa (Western balsam poplar) PE=4 SV=1	R	General function prediction only	PREDICTED: uncharacterized protein LOC101205837 [Cucumis sativus]
Csa2G431140	--	--	Cellular Component: nucleus (GO:0005634);; Cellular Component: endoplasmic reticulum (GO:0005783);;	--	--	[R]	General function prediction only	Transmembrane protein 18	Uncharacterized protein OS=Glycine max (Soybean) PE=2 SV=1	S	Function unknown	PREDICTED: transmembrane protein 18-like [Cucumis sativus]
Csa6G188150	--	--	--	--	--	--	--	--	Putative uncharacterized protein GN=VIT_12s0059g01050 OS=Vitis vinifera (Grape) PE=4 SV=1	--	--	PREDICTED: uncharacterized protein LOC101207341 [Cucumis sativus]
Csa3G727990	--	--	Molecular Function: sequence-specific DNA binding transcription factor activity (GO:0003700);; Biological Process: regulation of transcription, DNA-templated (GO:0006355);; Molecular Function: sequence-specific DNA binding (GO:0043565);;	--	--	--	--	WRKY DNA -binding domain	WRKY protein GN=WRKY22 OS=Cucumis sativus (Cucumber) PE=2 SV=1	K	Transcription	probable WRKY transcription factor 70-like [Cucumis sativus]
Csa6G400300	[K]	Transcription	Molecular Function: DNA binding (GO:0003677);; Molecular Function: DNA-directed RNA polymerase activity (GO:0003899);; Cellular Component: nucleus (GO:0005634);; Cellular Component: cytosol (GO:0005829);; Biological Process: transcription, DNA-templated (GO:0006351);; Cellular Component: chloroplast (GO:0009507);; Molecular Function: ribonucleoside binding (GO:0032549);;	K03002|0|csv:101214176|POLR1B; polymerase (RNA) I polypeptide B, 128kDa; K03002 DNA-directed RNA polymerase I subunit RPA2 [EC:2.7.7.6] (A)	Purine metabolism (ko00230);; Pyrimidine metabolism (ko00240);; RNA polymerase (ko03020)	[K]	Transcription	RNA polymerase Rpb2, domain 6;; RNA polymerase Rpb2, domain 3;; RNA polymerase beta subunit;; RNA polymerase Rpb2, domain 7;; RNA polymerase I, Rpa2 specific domain;; RNA polymerase Rpb2, domain 2	DNA-directed RNA polymerase GN=VIT_13s0084g00600 OS=Vitis vinifera (Grape) PE=3 SV=1	K	Transcription	PREDICTED: DNA-directed RNA polymerase I subunit RPA2-like [Cucumis sativus]
Cucumber_newGene_585	--	--	--	--	--	--	--	--	--	S	Function unknown	hypothetical protein SORBIDRAFT_1962s002010 [Sorghum bicolor]
Csa6G051500	--	--	Molecular Function: binding (GO:0005488);; Cellular Component: cytoplasm (GO:0005737);; Biological Process: anatomical structure morphogenesis (GO:0009653);; Biological Process: cellular component organization (GO:0016043);; Molecular Function: oxidoreductase activity (GO:0016491);; Molecular Function: hydrolase activity (GO:0016787);; Biological Process: cell differentiation (GO:0030154);; Biolo…	--	--	[U]	Intracellular trafficking, secretion, and vesicular transport	Endonuclease/Exonuclease/phosphatase family	Uncharacterized protein GN=PRUPE_ppa005831mg OS=Prunus persica (Peach) PE=4 SV=1	U	Intracellular trafficking, secretion, and vesicular transport	PREDICTED: type I inositol 1,4,5-trisphosphate 5-phosphatase CVP2-like [Cucumis sativus]
Cucumber_newGene_237	[C]	Energy production and conversion	--	K05894|0|cmo:103485373|putative 12-oxophytodienoate reductase 11; K05894 12-oxophytodienoic acid reductase [EC:1.3.1.42] (A)	alpha-Linolenic acid metabolism (ko00592)	[CR]	Energy production and conversion;; General function prediction only	NADH:flavin oxidoreductase / NADH oxidase family	12-oxophytodienoate reductase 1 GN=OPR1 OS=Arabidopsis thaliana (Mouse-ear cress) PE=1 SV=2	C	Energy production and conversion	PREDICTED: 12-oxophytodienoate reductase 1-like [Cucumis sativus]
Csa6G355960	[M]	Cell wall/membrane/envelope biogenesis	--	--	--	--	--	Glycosyltransferase family 92;; Glycosyl transferase family 2	Putative uncharacterized protein GN=VIT_18s0122g01230 OS=Vitis vinifera (Grape) PE=4 SV=1	S	Function unknown	PREDICTED: UPF0392 protein At1g27200-like [Cucumis sativus]
Csa2G426800	--	--	Molecular Function: abscisic acid glucosyltransferase activity (GO:0010294);; Molecular Function: UDP-glucosyltransferase activity (GO:0035251);;	K13692|0|csv:101203684|UDP-glycosyltransferase 84B2-like; K13692 UDP-glucose:(indol-3-yl)acetate beta-D-glucosyltransferase [EC:2.4.1.121] (A)	--	[GC]	Carbohydrate transport and metabolism;; Energy production and conversion	UDP-glucoronosyl and UDP-glucosyl transferase	Uncharacterized protein OS=Glycine max (Soybean) PE=3 SV=1	CG	Energy production and conversion;; Carbohydrate transport and metabolism	PREDICTED: UDP-glycosyltransferase 84B2-like [Cucumis sativus]
Csa1G467710	--	--	Molecular Function: DNA binding (GO:0003677);; Biological Process: response to stress (GO:0006950);; Biological Process: metabolic process (GO:0008152);; Biological Process: regulation of cellular process (GO:0050794);;	K09419|0|csv:101204390|heat stress transcription factor A-4a-like; K09419 heat shock transcription factor, other eukaryote (A)	--	[K]	Transcription	HSF-type DNA-binding	Predicted protein GN=POPTRDRAFT_568665 OS=Populus trichocarpa (Western balsam poplar) PE=3 SV=1	K	Transcription	PREDICTED: heat stress transcription factor A-4a-like [Cucumis sativus]
Cucumber_newGene_1100	[R]	General function prediction only	--	K00670|0|csv:101221599|N-alpha-acetyltransferase 15, NatA auxiliary subunit-like; K00670 peptide alpha-N-acetyltransferase [EC:2.3.1.88] (A)	--	[B]	Chromatin structure and dynamics	NMDA receptor-regulated protein 1;; NMDA receptor-regulated protein 1;; TPR repeat;; Tetratricopeptide repeat;; Tetratricopeptide repeat;; Tetratricopeptide repeat;; Tetratricopeptide repeat;; Tetratricopeptide repeat;; Tetratricopeptide repeat;; Tetratricopeptide repeat;; Tetratricopeptide repeat;; Tetratricopeptide repeat;; Tetratricopeptide repeat;; Fis1 C-terminal tetratricopeptide repeat;; T…	--	B	Chromatin structure and dynamics	PREDICTED: N-alpha-acetyltransferase 15, NatA auxiliary subunit-like [Cucumis sativus]
CsaUNG012460	[L]	Replication, recombination and repair	--	--	--	--	--	Putative transposase DNA-binding domain;; Probable transposase;; Helix-turn-helix domain	Putative uncharacterized protein GN=PHYSODRAFT_247336 OS=Phytophthora sojae (strain P6497) PE=4 SV=1	L	Replication, recombination and repair	hypothetical protein PFL1_00340 [Pseudozyma flocculosa PF-1]
Csa2G000430	--	--	--	--	--	--	--	--	--	--	--	GTPase IMAP family member 1, putative [Theobroma cacao]
Csa2G428920	[V]	Defense mechanisms	Molecular Function: ATP binding (GO:0005524);; Biological Process: ATP catabolic process (GO:0006200);; Molecular Function: xenobiotic-transporting ATPase activity (GO:0008559);; Molecular Function: peptide-transporting ATPase activity (GO:0015440);; Cellular Component: integral component of membrane (GO:0016021);; Biological Process: transmembrane transport (GO:0055085);;	K05658|0|csv:101202958|ABC transporter B family member 19-like; K05658 ATP-binding cassette, subfamily B (MDR/TAP), member 1 [EC:3.6.3.44] (A)	ABC transporters (ko02010)	[Q]	Secondary metabolites biosynthesis, transport and catabolism	ABC transporter;; ABC transporter transmembrane region;; AAA domain;; RecF/RecN/SMC N terminal domain;; Predicted ATPase of the ABC class;; P-loop containing region of AAA domain;; AAA ATPase domain;; Protein of unknown function, DUF258;; AAA domain;; AAA domain (dynein-related subfamily);; 50S ribosome-binding GTPase	Uncharacterized protein GN=PRUPE_ppa023953mg OS=Prunus persica (Peach) PE=4 SV=1	Q	Secondary metabolites biosynthesis, transport and catabolism	PREDICTED: ABC transporter B family member 19-like [Cucumis sativus]
Csa7G237880	--	--	Cellular Component: mitochondrion (GO:0005739);; Cellular Component: plasmodesma (GO:0009506);; Cellular Component: membrane (GO:0016020);;	--	--	--	--	--	Uncharacterized protein GN=PRUPE_ppa011629mg OS=Prunus persica (Peach) PE=4 SV=1	S	Function unknown	PREDICTED: uncharacterized protein LOC101230414 [Cucumis sativus]
Csa4G486190	[K]	Transcription	Molecular Function: nucleic acid binding (GO:0003676);; Molecular Function: RNA binding (GO:0003723);; Molecular Function: RNA-directed DNA polymerase activity (GO:0003964);; Molecular Function: thiamine diphosphokinase activity (GO:0004788);; Molecular Function: ATP binding (GO:0005524);; Cellular Component: small nucleolar ribonucleoprotein complex (GO:0005732);; Biological Process: RNA-depende…	K12623|5.55679e-67|cmo:103494929|probable U6 snRNA-associated Sm-like protein LSm4; K12623 U6 snRNA-associated Sm-like protein LSm4 (A)	RNA degradation (ko03018);; Spliceosome (ko03040)	[A]	RNA processing and modification	LSM domain	Uncharacterized protein OS=Glycine max (Soybean) PE=4 SV=1	A	RNA processing and modification	PREDICTED: probable U6 snRNA-associated Sm-like protein LSm4-like [Cucumis sativus]
Csa4G089260	--	--	--	--	--	--	--	TAF RNA Polymerase I subunit A	Uncharacterized protein GN=PRUPE_ppa026876mg OS=Prunus persica (Peach) PE=4 SV=1	S	Function unknown	PREDICTED: uncharacterized protein LOC101209917 [Cucumis sativus]
Csa2G009340	[O]	Posttranslational modification, protein turnover, chaperones	Biological Process: protein peptidyl-prolyl isomerization (GO:0000413);; Molecular Function: peptidyl-prolyl cis-trans isomerase activity (GO:0003755);; Biological Process: protein folding (GO:0006457);; Cellular Component: chloroplast (GO:0009507);; Cellular Component: thylakoid lumen (GO:0031977);;	K03768|1.98846e-162|csv:101228117|peptidyl-prolyl cis-trans isomerase CYP20-2, chloroplastic-like; K03768 peptidyl-prolyl cis-trans isomerase B (cyclophilin B) [EC:5.2.1.8] (A)	--	[O]	Posttranslational modification, protein turnover, chaperones	Cyclophilin type peptidyl-prolyl cis-trans isomerase/CLD	Uncharacterized protein GN=PGSC0003DMG400030738 OS=Solanum tuberosum (Potato) PE=3 SV=1	O	Posttranslational modification, protein turnover, chaperones	PREDICTED: peptidyl-prolyl cis-trans isomerase CYP20-2, chloroplastic-like [Cucumis sativus]
Csa3G800650	--	--	Cellular Component: plant-type cell wall (GO:0009505);; Cellular Component: chloroplast stroma (GO:0009570);;	--	--	--	--	--	Uncharacterized protein GN=PRUPE_ppa009807mg OS=Prunus persica (Peach) PE=4 SV=1	S	Function unknown	PREDICTED: uncharacterized protein LOC101219545 [Cucumis sativus]
Csa6G120420	[P]	Inorganic ion transport and metabolism	Molecular Function: nucleotide binding (GO:0000166);; Molecular Function: monooxygenase activity (GO:0004497);; Molecular Function: coenzyme binding (GO:0050662);;	K00485|0|csv:101212949|probable flavin-containing monooxygenase 1-like; K00485 dimethylaniline monooxygenase (N-oxide forming) [EC:1.14.13.8] (A)	--	[Q]	Secondary metabolites biosynthesis, transport and catabolism	Flavin-binding monooxygenase-like;; Pyridine nucleotide-disulphide oxidoreductase;; L-lysine 6-monooxygenase (NADPH-requiring);; Pyridine nucleotide-disulphide oxidoreductase;; NAD(P)-binding Rossmann-like domain	Putative uncharacterized protein GN=VIT_03s0038g03130 OS=Vitis vinifera (Grape) PE=4 SV=1	Q	Secondary metabolites biosynthesis, transport and catabolism	PREDICTED: probable flavin-containing monooxygenase 1-like [Cucumis sativus]
Csa5G633160	--	--	Molecular Function: metallopeptidase activity (GO:0008237);; Molecular Function: metal ion binding (GO:0046872);;	--	--	[OW]	Posttranslational modification, protein turnover, chaperones;; Extracellular structures	Matrixin;; Putative peptidoglycan binding domain	Metalloendoproteinase 1, putative GN=RCOM_0852690 OS=Ricinus communis (Castor bean) PE=4 SV=1	OW	Posttranslational modification, protein turnover, chaperones;; Extracellular structures	PREDICTED: metalloendoproteinase 1-like [Cucumis sativus]
Csa1G046840	[J]	Translation, ribosomal structure and biogenesis	Molecular Function: structural constituent of ribosome (GO:0003735);; Cellular Component: nucleolus (GO:0005730);; Biological Process: translation (GO:0006412);; Cellular Component: plasmodesma (GO:0009506);; Cellular Component: membrane (GO:0016020);; Cellular Component: cytosolic large ribosomal subunit (GO:0022625);;	K02900|1.65011e-101|csv:101228988|60S ribosomal protein L27a-3-like; K02900 large subunit ribosomal protein L27Ae (A)	Ribosome (ko03010)	[J]	Translation, ribosomal structure and biogenesis	Ribosomal protein L18e/L15	60S ribosomal protein L27B GN=RPL27B OS=Hevea brasiliensis (Para rubber tree) PE=2 SV=1	J	Translation, ribosomal structure and biogenesis	PREDICTED: 60S ribosomal protein L27a-3-like [Cucumis sativus]
Csa6G194150	--	--	Biological Process: single-organism cellular process (GO:0044763);; Biological Process: biological regulation (GO:0065007);;	--	--	--	--	Rapid ALkalinization Factor (RALF)	Putative uncharacterized protein GN=VIT_05s0020g01490 OS=Vitis vinifera (Grape) PE=2 SV=1	T	Signal transduction mechanisms	PREDICTED: protein RALF-like 33-like [Cucumis sativus]
Csa4G006080	[I]	Lipid transport and metabolism	Biological Process: long-chain fatty acid metabolic process (GO:0001676);; Biological Process: defense response to insect (GO:0002213);; Molecular Function: stearoyl-CoA 9-desaturase activity (GO:0004768);; Biological Process: fatty acid biosynthetic process (GO:0006633);; Biological Process: unsaturated fatty acid biosynthetic process (GO:0006636);; Biological Process: phosphatidylglycerol biosy…	K00507|2.64184e-61|csv:101225241|palmitoyl-monogalactosyldiacylglycerol delta-7 desaturase, chloroplastic-like; K00507 stearoyl-CoA desaturase (delta-9 desaturase) [EC:1.14.19.1] (A)	Biosynthesis of unsaturated fatty acids (ko01040);; Fatty acid metabolism (ko01212)	[I]	Lipid transport and metabolism	--	Putative uncharacterized protein GN=VIT_09s0002g06970 OS=Vitis vinifera (Grape) PE=3 SV=1	I	Lipid transport and metabolism	PREDICTED: palmitoyl-monogalactosyldiacylglycerol delta-7 desaturase, chloroplastic-like [Cucumis sativus]
Csa3G819920	--	--	Molecular Function: DNA binding (GO:0003677);; Biological Process: DNA metabolic process (GO:0006259);; Biological Process: protein import into nucleus (GO:0006606);; Biological Process: meiosis I (GO:0007127);; Biological Process: cellular process (GO:0009987);;	--	--	[R]	General function prediction only	PPR repeat;; Pentatricopeptide repeat domain;; PPR repeat family;; PPR repeat;; Tetratricopeptide repeat	DNA-binding protein OS=Cucumis melo subsp. melo PE=4 SV=1	R	General function prediction only	PREDICTED: pentatricopeptide repeat-containing protein At1g80270, mitochondrial-like [Cucumis sativus]
Csa1G574940	--	--	Cellular Component: mitochondrial outer membrane (GO:0005741);; Cellular Component: mitochondrial inner membrane presequence translocase complex (GO:0005744);; Biological Process: intracellular protein transport (GO:0006886);; Biological Process: mitotic nuclear division (GO:0007067);; Molecular Function: P-P-bond-hydrolysis-driven protein transmembrane transporter activity (GO:0015450);; Cellula…	K17795|6.22091e-122|cmo:103492263|mitochondrial import inner membrane translocase subunit TIM17-2-like; K17795 mitochondrial import inner membrane translocase subunit TIM17 (A)	--	[U]	Intracellular trafficking, secretion, and vesicular transport	Tim17/Tim22/Tim23/Pmp24 family	Putative uncharacterized protein GN=VIT_11s0016g03110 OS=Vitis vinifera (Grape) PE=4 SV=1	U	Intracellular trafficking, secretion, and vesicular transport	PREDICTED: mitochondrial import inner membrane translocase subunit Tim17-like [Cucumis sativus]
Csa3G627690	--	--	--	--	--	--	--	BSD domain	Uncharacterized protein OS=Glycine max (Soybean) PE=2 SV=1	S	Function unknown	PREDICTED: uncharacterized protein LOC101211516 [Cucumis sativus]
Csa1G001390	[BK]	Chromatin structure and dynamics;; Transcription	Molecular Function: binding (GO:0005488);; Cellular Component: nucleus (GO:0005634);; Biological Process: embryo sac egg cell differentiation (GO:0009560);; Biological Process: regulation of gene expression, epigenetic (GO:0040029);;	K11649|0|csv:101222310|SWI/SNF complex subunit SWI3A-like; K11649 SWI/SNF related-matrix-associated actin-dependent regulator of chromatin subfamily C (A)	--	[B]	Chromatin structure and dynamics	SWIRM domain;; Myb-like DNA-binding domain;; Myb-like DNA-binding domain	Putative uncharacterized protein GN=VIT_17s0000g00990 OS=Vitis vinifera (Grape) PE=4 SV=1	B	Chromatin structure and dynamics	PREDICTED: SWI/SNF complex subunit SWI3A-like [Cucumis sativus]
Csa6G141360	--	--	Molecular Function: sequence-specific DNA binding transcription factor activity (GO:0003700);; Cellular Component: nucleus (GO:0005634);; Biological Process: regulation of transcription, DNA-templated (GO:0006355);; Biological Process: cell adhesion (GO:0007155);; Molecular Function: lipid binding (GO:0008289);; Biological Process: determination of bilateral symmetry (GO:0009855);; Biological Pro…	K09338|0|csv:101226554|homeobox-leucine zipper protein REVOLUTA-like; K09338 homeobox-leucine zipper protein (A)	--	--	--	MEKHLA domain;; START domain;; Homeobox domain	DNA binding protein, putative GN=RCOM_0034760 OS=Ricinus communis (Castor bean) PE=3 SV=1	K	Transcription	PREDICTED: homeobox-leucine zipper protein REVOLUTA-like [Cucumis sativus]
Csa1G039950	--	--	Molecular Function: protein binding (GO:0005515);; Biological Process: response to water deprivation (GO:0009414);; Biological Process: stomatal complex patterning (GO:0010375);; Biological Process: plasmodesmata-mediated intercellular transport (GO:0010497);; Cellular Component: microtubule cytoskeleton (GO:0015630);; Biological Process: cortical microtubule organization (GO:0043622);; Biologica…	--	--	--	--	--	Putative uncharacterized protein GN=RCOM_1467490 OS=Ricinus communis (Castor bean) PE=4 SV=1	S	Function unknown	PREDICTED: uncharacterized protein LOC101224915 [Cucumis sativus]
Csa3G134530	--	--	Cellular Component: mitochondrion (GO:0005739);; Biological Process: plant-type cell wall modification (GO:0009827);; Biological Process: pollen tube growth (GO:0009860);;	--	--	--	--	Universal stress protein family	Uncharacterized protein OS=Glycine max (Soybean) PE=4 SV=1	S	Function unknown	PREDICTED: uncharacterized protein LOC101222608 isoform 1 [Cucumis sativus]
Csa2G055000	[E]	Amino acid transport and metabolism	Molecular Function: oxidoreductase activity, acting on CH-OH group of donors (GO:0016614);; Biological Process: single-organism metabolic process (GO:0044710);; Molecular Function: mandelonitrile lyase activity (GO:0046593);; Molecular Function: flavin adenine dinucleotide binding (GO:0050660);; Biological Process: nitrile metabolic process (GO:0050898);; Biological Process: organic substance met…	K08248|0|cmo:103493164|(R)-mandelonitrile lyase 1-like; K08248 mandelonitrile lyase [EC:4.1.2.10] (A)	Cyanoamino acid metabolism (ko00460)	[R]	General function prediction only	GMC oxidoreductase;; GMC oxidoreductase	Uncharacterized protein (Fragment) GN=PRUPE_ppa015533mg OS=Prunus persica (Peach) PE=4 SV=1	G	Carbohydrate transport and metabolism	PREDICTED: (R)-mandelonitrile lyase 1-like [Cucumis sativus]
Csa5G649860	[R]	General function prediction only	Biological Process: RNA splicing, via endonucleolytic cleavage and ligation (GO:0000394);; Molecular Function: carboxylic ester hydrolase activity (GO:0004091);; Cellular Component: nucleus (GO:0005634);; Cellular Component: vacuole (GO:0005773);; Biological Process: methionine biosynthetic process (GO:0009086);;	K13617|0|csv:101204951|protein phosphatase methylesterase 1-like; K13617 protein phosphatase methylesterase 1 [EC:3.1.1.89] (A)	--	[R]	General function prediction only	Alpha/beta hydrolase family;; alpha/beta hydrolase fold;; Alpha/beta hydrolase family;; Thioesterase domain;; alpha/beta hydrolase fold;; PGAP1-like protein;; Putative esterase	Protein phosphatase methylesterase 1 OS=Glycine max (Soybean) PE=3 SV=1	R	General function prediction only	PREDICTED: protein phosphatase methylesterase 1-like [Cucumis sativus]
Csa6G055410	[RTKL]	General function prediction only;; Signal transduction mechanisms;; Transcription;; Replication, recombination and repair	Molecular Function: protein serine/threonine kinase activity (GO:0004674);; Molecular Function: ATP binding (GO:0005524);; Biological Process: protein phosphorylation (GO:0006468);;	--	--	[T]	Signal transduction mechanisms	Protein tyrosine kinase;; Protein kinase domain;; Phosphotransferase enzyme family	Putative uncharacterized protein GN=VIT_18s0072g00170 OS=Vitis vinifera (Grape) PE=3 SV=1	T	Signal transduction mechanisms	PREDICTED: phytosulfokine receptor 2-like [Cucumis sativus]
Csa6G516590	[RTKL]	General function prediction only;; Signal transduction mechanisms;; Transcription;; Replication, recombination and repair	Molecular Function: protein kinase activity (GO:0004672);; Biological Process: cellular process (GO:0009987);; Biological Process: single-organism process (GO:0044699);; Biological Process: response to stimulus (GO:0050896);;	--	--	--	--	Salt stress response/antifungal;; Protein kinase domain;; Protein tyrosine kinase	Putative uncharacterized protein GN=VIT_00s0398g00010 OS=Vitis vinifera (Grape) PE=4 SV=1	T	Signal transduction mechanisms	PREDICTED: cysteine-rich receptor-like protein kinase 8-like [Cucumis sativus]
Csa6G403620	--	--	Cellular Component: mitochondrion (GO:0005739);; Cellular Component: chloroplast (GO:0009507);;	--	--	--	--	Domain of unknown function (DUF1338)	Uncharacterized protein GN=PRUPE_ppa006928mg OS=Prunus persica (Peach) PE=4 SV=1	S	Function unknown	PREDICTED: uncharacterized LOC101218869 [Cucumis sativus]
Csa2G100000	[R]	General function prediction only	Molecular Function: oxidoreductase activity, acting on the CH-OH group of donors, NAD or NADP as acceptor (GO:0016616);; Molecular Function: transferase activity, transferring acyl groups (GO:0016746);;	--	--	[R]	General function prediction only	Aldo/keto reductase family	D-galacturonic acid reductase 1 GN=GalUR1 OS=Actinidia deliciosa (Kiwi) PE=2 SV=1	R	General function prediction only	PREDICTED: non-functional NADPH-dependent codeinone reductase 2-like [Cucumis sativus]
Csa2G129150	[I]	Lipid transport and metabolism	Molecular Function: acetyl-CoA C-acyltransferase activity (GO:0003988);; Cellular Component: nucleolus (GO:0005730);; Cellular Component: mitochondrion (GO:0005739);; Cellular Component: vacuolar membrane (GO:0005774);; Cellular Component: peroxisome (GO:0005777);; Cellular Component: cytosol (GO:0005829);; Cellular Component: plasma membrane (GO:0005886);; Biological Process: fatty acid beta-oxi…	K07513|0|csv:101212301|3-ketoacyl-CoA thiolase 2, peroxisomal-like; K07513 acetyl-CoA acyltransferase 1 [EC:2.3.1.16] (A)	Fatty acid degradation (ko00071);; Valine, leucine and isoleucine degradation (ko00280);; alpha-Linolenic acid metabolism (ko00592);; Biosynthesis of unsaturated fatty acids (ko01040);; Fatty acid metabolism (ko01212);; Peroxisome (ko04146)	[I]	Lipid transport and metabolism	Thiolase, N-terminal domain;; Thiolase, C-terminal domain	3-ketoacyl-CoA thiolase (Precursor) OS=Cucurbita cv. Kurokawa Amakuri PE=1 SV=1	I	Lipid transport and metabolism	PREDICTED: 3-ketoacyl-CoA thiolase 2, peroxisomal-like [Cucumis sativus]
Csa3G483830	--	--	Cellular Component: chloroplast thylakoid membrane (GO:0009535);; Cellular Component: photosystem I reaction center (GO:0009538);; Cellular Component: plastoglobule (GO:0010287);; Biological Process: photosynthesis (GO:0015979);; Cellular Component: integral component of membrane (GO:0016021);;	K02695|4.05906e-51|cmo:103489943|photosystem I reaction center subunit VI, chloroplastic; K02695 photosystem I subunit VI (A)	Photosynthesis (ko00195)	--	--	Photosystem I reaction centre subunit VI	Putative uncharacterized protein GN=POPTRDRAFT_712066 OS=Populus trichocarpa (Western balsam poplar) PE=2 SV=1	R	General function prediction only	hypothetical protein POPTRDRAFT_712066 [Populus trichocarpa]
Csa6G505300	[O]	Posttranslational modification, protein turnover, chaperones	Biological Process: cellular protein modification process (GO:0006464);; Molecular Function: peptide-methionine (S)-S-oxide reductase activity (GO:0008113);; Cellular Component: chloroplast (GO:0009507);; Cellular Component: cytoplasmic membrane-bounded vesicle (GO:0016023);; Biological Process: oxidation-reduction process (GO:0055114);;	K07304|0|csv:101204515|peptide methionine sulfoxide reductase A5-like; K07304 peptide-methionine (S)-S-oxide reductase [EC:1.8.4.11] (A)	--	[O]	Posttranslational modification, protein turnover, chaperones	Peptide methionine sulfoxide reductase	Uncharacterized protein GN=PRUPE_ppa010381mg OS=Prunus persica (Peach) PE=4 SV=1	O	Posttranslational modification, protein turnover, chaperones	PREDICTED: peptide methionine sulfoxide reductase A5-like [Cucumis sativus]
Csa6G042490	[G]	Carbohydrate transport and metabolism	Cellular Component: nucleus (GO:0005634);; Cellular Component: cytosol (GO:0005829);; Biological Process: starch catabolic process (GO:0005983);; Biological Process: sucrose biosynthetic process (GO:0005986);; Biological Process: fructose metabolic process (GO:0006000);; Biological Process: response to abscisic acid (GO:0009737);; Biological Process: response to fructose (GO:0009750);; Biological…	K03841|0|csv:101205576|fructose-1,6-bisphosphatase, cytosolic-like; K03841 fructose-1,6-bisphosphatase I [EC:3.1.3.11] (A)	Glycolysis / Gluconeogenesis (ko00010);; Pentose phosphate pathway (ko00030);; Fructose and mannose metabolism (ko00051);; Carbon fixation in photosynthetic organisms (ko00710);; Carbon metabolism (ko01200)	[G]	Carbohydrate transport and metabolism	Fructose-1-6-bisphosphatase	Uncharacterized protein GN=Solyc12g056530.1 OS=Solanum lycopersicum (Tomato) PE=3 SV=1	G	Carbohydrate transport and metabolism	PREDICTED: fructose-1,6-bisphosphatase, cytosolic-like [Cucumis sativus]
Csa1G542490	--	--	--	--	--	--	--	Phloem protein 2	26 kDa phloem lectin GN=Lec26 OS=Cucumis melo (Muskmelon) PE=2 SV=1	R	General function prediction only	PREDICTED: protein PHLOEM PROTEIN 2-LIKE A2-like isoform 1 [Cucumis sativus]
Csa6G538610	[C]	Energy production and conversion	Molecular Function: hydrolase activity (GO:0016787);;	K01514|0|cmo:103484247|protein prune homolog; K01514 exopolyphosphatase [EC:3.6.1.11] (A)	Purine metabolism (ko00230)	[C]	Energy production and conversion	DHHA2 domain	Putative uncharacterized protein GN=RCOM_1557920 OS=Ricinus communis (Castor bean) PE=4 SV=1	C	Energy production and conversion	PREDICTED: uncharacterized protein LOC101206974 [Cucumis sativus]
Csa1G231020	--	--	--	K13153|1.13389e-68|cmo:103487425|U11/U12 small nuclear ribonucleoprotein 25 kDa protein-like; K13153 U11/U12 small nuclear ribonucleoprotein 25 kDa protein (A)	--	--	--	--	Uncharacterized protein OS=Musa acuminata subsp. malaccensis (Wild banana) PE=4 SV=1	S	Function unknown	unknown [Lotus japonicus]
Csa5G209480	[T]	Signal transduction mechanisms	Biological Process: post-embryonic development (GO:0009791);; Molecular Function: hydrolase activity (GO:0016787);; Biological Process: single-organism cellular process (GO:0044763);; Biological Process: organ development (GO:0048513);; Biological Process: response to stimulus (GO:0050896);;	K17506|0|csv:101208170|probable protein phosphatase 2C 2-like; K17506 protein phosphatase 1L [EC:3.1.3.16] (A)	--	[T]	Signal transduction mechanisms	Protein phosphatase 2C;; Protein phosphatase 2C;; Stage II sporulation protein E (SpoIIE)	Uncharacterized protein GN=PRUPE_ppa007366mg OS=Prunus persica (Peach) PE=4 SV=1	T	Signal transduction mechanisms	PREDICTED: probable protein phosphatase 2C 2-like [Cucumis sativus]
Csa1G587410	--	--	--	--	--	[U]	Intracellular trafficking, secretion, and vesicular transport	PRA1 family protein	Uncharacterized protein GN=PRUPE_ppa020384mg OS=Prunus persica (Peach) PE=4 SV=1	U	Intracellular trafficking, secretion, and vesicular transport	PREDICTED: PRA1 family protein F2-like [Cucumis sativus]
Csa7G419550	--	--	Molecular Function: peroxidase activity (GO:0004601);; Biological Process: response to oxidative stress (GO:0006979);; Molecular Function: heme binding (GO:0020037);; Molecular Function: metal ion binding (GO:0046872);; Biological Process: oxidation-reduction process (GO:0055114);;	K00430|1.40568e-164|csv:101215978|peroxidase 5-like; K00430 peroxidase [EC:1.11.1.7] (A)	Phenylalanine metabolism (ko00360);; Phenylpropanoid biosynthesis (ko00940)	--	--	Peroxidase	Cationic peroxidase 1, putative GN=RCOM_0011200 OS=Ricinus communis (Castor bean) PE=3 SV=1	R	General function prediction only	PREDICTED: peroxidase 5-like [Cucumis sativus]
Csa4G624990	[RTKL]	General function prediction only;; Signal transduction mechanisms;; Transcription;; Replication, recombination and repair	Molecular Function: protein serine/threonine kinase activity (GO:0004674);; Molecular Function: non-membrane spanning protein tyrosine kinase activity (GO:0004715);; Molecular Function: ATP binding (GO:0005524);; Cellular Component: plasma membrane (GO:0005886);; Biological Process: protein phosphorylation (GO:0006468);; Molecular Function: 2-alkenal reductase [NAD(P)] activity (GO:0032440);; Bio…	--	--	--	--	Protein tyrosine kinase;; Protein kinase domain	Predicted protein (Fragment) GN=POPTRDRAFT_286171 OS=Populus trichocarpa (Western balsam poplar) PE=4 SV=1	T	Signal transduction mechanisms	PREDICTED: probable LRR receptor-like serine/threonine-protein kinase At1g53440-like [Cucumis sativus]
Csa5G608600	[O]	Posttranslational modification, protein turnover, chaperones	Molecular Function: damaged DNA binding (GO:0003684);; Molecular Function: protein binding (GO:0005515);; Cellular Component: nucleus (GO:0005634);; Biological Process: nucleotide-excision repair (GO:0006289);; Biological Process: proteasome-mediated ubiquitin-dependent protein catabolic process (GO:0043161);;	K10839|5.19761e-159|cmo:103489268|ubiquitin receptor RAD23c-like; K10839 UV excision repair protein RAD23 (A)	Nucleotide excision repair (ko03420);; Protein processing in endoplasmic reticulum (ko04141)	[L]	Replication, recombination and repair	UBA/TS-N domain;; XPC-binding domain;; Ubiquitin family;; Ubiquitin-2 like Rad60 SUMO-like	Uv excision repair protein rad23, putative GN=RCOM_0352420 OS=Ricinus communis (Castor bean) PE=4 SV=1	L	Replication, recombination and repair	PREDICTED: putative DNA repair protein RAD23-3-like [Cucumis sativus]
Csa7G183150	--	--	Biological Process: post-embryonic development (GO:0009791);; Biological Process: reproductive structure development (GO:0048608);; Biological Process: system development (GO:0048731);;	--	--	--	--	--	Putative uncharacterized protein GN=RCOM_0584630 OS=Ricinus communis (Castor bean) PE=4 SV=1	S	Function unknown	PREDICTED: uncharacterized protein LOC101218535 [Cucumis sativus]
Csa4G133700	[EH]	Amino acid transport and metabolism;; Coenzyme transport and metabolism	Molecular Function: magnesium ion binding (GO:0000287);; Molecular Function: pyruvate decarboxylase activity (GO:0004737);; Cellular Component: cytosol (GO:0005829);; Molecular Function: oxalyl-CoA decarboxylase activity (GO:0008949);; Biological Process: toxin catabolic process (GO:0009407);; Cellular Component: chloroplast (GO:0009507);; Biological Process: response to cyclopentenone (GO:001058…	K12261|0|csv:101218890|2-hydroxyacyl-CoA lyase-like; K12261 2-hydroxyacyl-CoA lyase 1 [EC:4.1.-.-] (A)	Peroxisome (ko04146)	[EH]	Amino acid transport and metabolism;; Coenzyme transport and metabolism	Thiamine pyrophosphate enzyme, N-terminal TPP binding domain;; Thiamine pyrophosphate enzyme, C-terminal TPP binding domain;; Thiamine pyrophosphate enzyme, central domain	Uncharacterized protein GN=PRUPE_ppa003377mg OS=Prunus persica (Peach) PE=4 SV=1	EH	Amino acid transport and metabolism;; Coenzyme transport and metabolism	PREDICTED: LOW QUALITY PROTEIN: 2-hydroxyacyl-CoA lyase-like [Cucumis sativus]
Csa2G074080	[O]	Posttranslational modification, protein turnover, chaperones	Molecular Function: electron carrier activity (GO:0009055);; Cellular Component: chloroplast stroma (GO:0009570);; Cellular Component: chloroplast envelope (GO:0009941);; Molecular Function: protein disulfide oxidoreductase activity (GO:0015035);; Molecular Function: glutathione disulfide oxidoreductase activity (GO:0015038);; Molecular Function: antiporter activity (GO:0015297);; Biological Proc…	K07390|1.05619e-123|csv:101210806|monothiol glutaredoxin-S14, chloroplastic-like; K07390 monothiol glutaredoxin (A)	--	[O]	Posttranslational modification, protein turnover, chaperones	Glutaredoxin	Uncharacterized protein OS=Lotus japonicus (Lotus corniculatus var. japonicus) PE=2 SV=1	O	Posttranslational modification, protein turnover, chaperones	PREDICTED: monothiol glutaredoxin-S14, chloroplastic-like [Cucumis sativus]
Csa3G038730	[L]	Replication, recombination and repair	Molecular Function: DNA binding (GO:0003677);; Molecular Function: DNA-directed DNA polymerase activity (GO:0003887);; Molecular Function: ATP binding (GO:0005524);; Cellular Component: nucleus (GO:0005634);; Cellular Component: DNA replication factor C complex (GO:0005663);; Biological Process: ATP catabolic process (GO:0006200);; Biological Process: DNA replication (GO:0006260);; Molecular Func…	K10755|0|csv:101228341|replication factor C subunit 2-like; K10755 replication factor C subunit 2/4 (A)	DNA replication (ko03030);; Nucleotide excision repair (ko03420);; Mismatch repair (ko03430)	[L]	Replication, recombination and repair	Replication factor C C-terminal domain;; ATPase family associated with various cellular activities (AAA);; DNA polymerase III, delta subunit;; AAA domain;; Rad17 cell cycle checkpoint protein;; AAA ATPase domain;; Part of AAA domain;; Magnesium chelatase, subunit ChlI;; Holliday junction DNA helicase ruvB N-terminus	Uncharacterized protein GN=PRUPE_ppa008426mg OS=Prunus persica (Peach) PE=4 SV=1	L	Replication, recombination and repair	PREDICTED: replication factor C subunit 2-like [Cucumis sativus]
Csa1G013170	[O]	Posttranslational modification, protein turnover, chaperones	Molecular Function: nucleotide binding (GO:0000166);; Molecular Function: protein binding (GO:0005515);; Molecular Function: ATP binding (GO:0005524);; Biological Process: protein folding (GO:0006457);; Biological Process: response to heat (GO:0009408);; Cellular Component: chloroplast stroma (GO:0009570);; Biological Process: response to high light intensity (GO:0009644);; Cellular Component: ch…	K03695|0|csv:101217495|chaperone protein ClpB1-like; K03695 ATP-dependent Clp protease ATP-binding subunit ClpB (A)	--	[O]	Posttranslational modification, protein turnover, chaperones	AAA domain (Cdc48 subfamily);; ATPase family associated with various cellular activities (AAA);; AAA domain (dynein-related subfamily);; C-terminal, D2-small domain, of ClpB protein;; AAA ATPase domain;; AAA domain;; AAA domain;; Sigma-54 interaction domain;; AAA domain;; IstB-like ATP binding protein;; AAA domain;; Zeta toxin;; Protein of unknown function (DUF815);; NACHT domain;; RNA helicase;;…	Uncharacterized protein GN=PRUPE_ppa001102mg OS=Prunus persica (Peach) PE=4 SV=1	O	Posttranslational modification, protein turnover, chaperones	PREDICTED: chaperone protein ClpB1-like [Cucumis sativus]
Csa7G390160	--	--	Cellular Component: mitochondrial inner membrane (GO:0005743);; Cellular Component: integral component of membrane (GO:0016021);; Biological Process: transmembrane transport (GO:0055085);;	--	--	[C]	Energy production and conversion	Mitochondrial carrier protein	Predicted protein (Fragment) GN=POPTRDRAFT_246016 OS=Populus trichocarpa (Western balsam poplar) PE=2 SV=1	C	Energy production and conversion	PREDICTED: mitochondrial substrate carrier family protein ucpB-like [Cucumis sativus]
Csa3G171190	--	--	--	--	--	--	--	--	Late embryogenesis abundant protein D-29 OS=Cucumis melo subsp. melo PE=4 SV=1	R	General function prediction only	PREDICTED: late embryogenesis abundant protein D-29-like [Cucumis sativus]
Csa2G345950	[R]	General function prediction only	Biological Process: microtubule cytoskeleton organization (GO:0000226);; Molecular Function: sphingomyelin phosphodiesterase activity (GO:0004767);; Molecular Function: GTP binding (GO:0005525);; Cellular Component: nucleolus (GO:0005730);; Cellular Component: spindle (GO:0005819);; Cellular Component: plasma membrane (GO:0005886);; Biological Process: small GTPase mediated signal transduction (G…	K04392|4.77051e-135|csv:101216083|rac-like GTP-binding protein RAC1-like; K04392 Ras-related C3 botulinum toxin substrate 1 (A)	Phagosome (ko04145)	[R]	General function prediction only	Ras family;; Miro-like protein	Putative uncharacterized protein GN=VIT_18s0001g14670 OS=Vitis vinifera (Grape) PE=3 SV=1	R	General function prediction only	PREDICTED: rac-like GTP-binding protein RAC1-like [Cucumis sativus]
Csa3G736910	--	--	Cellular Component: mitochondrion (GO:0005739);;	--	--	[R]	General function prediction only	PPR repeat family;; PPR repeat;; PPR repeat;; Pentatricopeptide repeat domain	Uncharacterized protein OS=Glycine max (Soybean) PE=4 SV=1	R	General function prediction only	PREDICTED: pentatricopeptide repeat-containing protein At3g53360, mitochondrial-like [Cucumis sativus]
Csa5G647280	[E]	Amino acid transport and metabolism	Molecular Function: transporter activity (GO:0005215);; Cellular Component: plasma membrane (GO:0005886);; Biological Process: oligopeptide transport (GO:0006857);; Biological Process: response to nematode (GO:0009624);; Biological Process: xylem development (GO:0010089);; Cellular Component: integral component of membrane (GO:0016021);; Biological Process: cell wall macromolecule metabolic proce…	K14638|0|csv:101221996|probable peptide/nitrate transporter At1g33440-like; K14638 solute carrier family 15 (peptide/histidine transporter), member 3/4 (A)	--	[E]	Amino acid transport and metabolism	POT family	Uncharacterized protein GN=PRUPE_ppa019863mg OS=Prunus persica (Peach) PE=4 SV=1	P	Inorganic ion transport and metabolism	PREDICTED: probable peptide/nitrate transporter At1g33440-like [Cucumis sativus]
Csa1G004190	--	--	--	--	--	--	--	G-patch domain	Putative uncharacterized protein GN=VIT_17s0000g08950 OS=Vitis vinifera (Grape) PE=4 SV=1	R	General function prediction only	PREDICTED: LOW QUALITY PROTEIN: uncharacterized protein LOC101205178 [Cucumis sativus]
Csa3G002700	[O]	Posttranslational modification, protein turnover, chaperones	Biological Process: defense response to insect (GO:0002213);; Molecular Function: threonine-type endopeptidase activity (GO:0004298);; Molecular Function: glutamate-cysteine ligase activity (GO:0004357);; Cellular Component: nucleus (GO:0005634);; Cellular Component: vacuole (GO:0005773);; Cellular Component: spindle (GO:0005819);; Cellular Component: plasma membrane (GO:0005886);; Biological Pro…	K02731|4.98582e-161|csv:101218002|proteasome subunit alpha type-7-like; K02731 20S proteasome subunit alpha 4 [EC:3.4.25.1] (A)	Proteasome (ko03050)	[O]	Posttranslational modification, protein turnover, chaperones	Proteasome subunit;; Proteasome subunit A N-terminal signature	Proteasome subunit alpha type GN=PGSC0003DMG400006193 OS=Solanum tuberosum (Potato) PE=2 SV=1	O	Posttranslational modification, protein turnover, chaperones	PREDICTED: proteasome subunit alpha type-7-like [Cucumis sativus]
Csa7G073510	[GC]	Carbohydrate transport and metabolism;; Energy production and conversion	Biological Process: metabolic process (GO:0008152);; Biological Process: cellular process (GO:0009987);; Molecular Function: UDP-glucosyltransferase activity (GO:0035251);; Biological Process: organic substance biosynthetic process (GO:1901576);;	--	--	[GC]	Carbohydrate transport and metabolism;; Energy production and conversion	UDP-glucoronosyl and UDP-glucosyl transferase	Uncharacterized protein GN=PRUPE_ppa004924mg OS=Prunus persica (Peach) PE=4 SV=1	CG	Energy production and conversion;; Carbohydrate transport and metabolism	PREDICTED: LOW QUALITY PROTEIN: UDP-glucose flavonoid 3-O-glucosyltransferase 7-like [Cucumis sativus]
Csa1G009720	--	--	--	--	--	--	--	--	Uncharacterized protein OS=Glycine max (Soybean) PE=4 SV=1	R	General function prediction only	hypothetical protein PRUPE_ppa017808mg [Prunus persica]
Csa6G104600	[J]	Translation, ribosomal structure and biogenesis	Molecular Function: translation elongation factor activity (GO:0003746);; Molecular Function: GTPase activity (GO:0003924);; Molecular Function: ATP binding (GO:0005524);; Molecular Function: GTP binding (GO:0005525);; Cellular Component: mitochondrion (GO:0005739);; Biological Process: GTP catabolic process (GO:0006184);; Biological Process: translational elongation (GO:0006414);; Biological Pro…	K02355|0|csv:101211161|elongation factor G, mitochondrial-like; K02355 elongation factor G (A)	--	[J]	Translation, ribosomal structure and biogenesis	Elongation factor G, domain IV;; Elongation Factor G, domain II;; Elongation factor G C-terminus;; Elongation factor Tu domain 2;; Elongation factor Tu GTP binding domain	Uncharacterized protein GN=PRUPE_ppa001802mg OS=Prunus persica (Peach) PE=4 SV=1	J	Translation, ribosomal structure and biogenesis	PREDICTED: elongation factor G, mitochondrial-like [Cucumis sativus]
Csa1G680070	--	--	--	--	--	--	--	--	Putative uncharacterized protein GN=VIT_14s0036g00660 OS=Vitis vinifera (Grape) PE=4 SV=1	UY	Intracellular trafficking, secretion, and vesicular transport;; Nuclear structure	PREDICTED: exportin-4-like [Cucumis sativus]
Csa3G609250	--	--	--	--	--	--	--	B3 DNA binding domain;; Domain of unknown function (DUF313);; Protein of unknown function, DUF594	Uncharacterized protein GN=PRUPE_ppa015816mg OS=Prunus persica (Peach) PE=4 SV=1	K	Transcription	hypothetical protein PRUPE_ppa015816mg [Prunus persica]
Csa6G398210	--	--	--	--	--	--	--	--	Predicted protein GN=POPTRDRAFT_714634 OS=Populus trichocarpa (Western balsam poplar) PE=4 SV=1	S	Function unknown	predicted protein [Populus trichocarpa]
Csa2G416190	[M]	Cell wall/membrane/envelope biogenesis	Cellular Component: membrane (GO:0016020);; Molecular Function: transferase activity (GO:0016740);; Molecular Function: transferase activity, transferring glycosyl groups (GO:0016757);;	--	--	--	--	Cellulose synthase	Putative uncharacterized protein GN=VIT_12s0059g00960 OS=Vitis vinifera (Grape) PE=4 SV=1	S	Function unknown	PREDICTED: cellulose synthase-like protein H1-like [Cucumis sativus]
Csa4G476190	[I]	Lipid transport and metabolism	Molecular Function: 1-acylglycerol-3-phosphate O-acyltransferase activity (GO:0003841);; Biological Process: unsaturated fatty acid biosynthetic process (GO:0006636);; Biological Process: phosphatidylglycerol biosynthetic process (GO:0006655);; Biological Process: embryo development ending in seed dormancy (GO:0009793);; Cellular Component: chloroplast envelope (GO:0009941);; Biological Process: …	K00655|6.10272e-173|csv:101227175|1-acyl-sn-glycerol-3-phosphate acyltransferase 1, chloroplastic-like; K00655 1-acyl-sn-glycerol-3-phosphate acyltransferase [EC:2.3.1.51] (A)	Glycerolipid metabolism (ko00561);; Glycerophospholipid metabolism (ko00564)	[I]	Lipid transport and metabolism	Acyltransferase	Putative uncharacterized protein GN=VIT_11s0037g00250 OS=Vitis vinifera (Grape) PE=2 SV=1	I	Lipid transport and metabolism	PREDICTED: 1-acyl-sn-glycerol-3-phosphate acyltransferase 1, chloroplastic-like [Cucumis sativus]
Csa4G625010	--	--	Cellular Component: plastid (GO:0009536);;	--	--	--	--	--	Putative uncharacterized protein GN=VIT_19s0014g00970 OS=Vitis vinifera (Grape) PE=4 SV=1	S	Function unknown	PREDICTED: uncharacterized protein LOC101222492 [Cucumis sativus]
Csa1G024810	[L]	Replication, recombination and repair	Molecular Function: double-stranded RNA binding (GO:0003725);; Molecular Function: fructose-bisphosphate aldolase activity (GO:0004332);; Molecular Function: ATP binding (GO:0005524);; Cellular Component: intracellular (GO:0005622);; Biological Process: glycolytic process (GO:0006096);; Molecular Function: ATP-dependent helicase activity (GO:0008026);;	K14442|0|csv:101225841|probable ATP-dependent RNA helicase DHX36-like; K14442 ATP-dependent RNA helicase DHX36 [EC:3.6.4.13] (A)	RNA degradation (ko03018)	[A]	RNA processing and modification	Helicase associated domain (HA2);; Oligonucleotide/oligosaccharide-binding (OB)-fold;; Helicase conserved C-terminal domain;; Double-stranded RNA binding motif;; DEAD/DEAH box helicase;; Type II/IV secretion system protein	Uncharacterized protein GN=PRUPE_ppa000376mg OS=Prunus persica (Peach) PE=4 SV=1	A	RNA processing and modification	PREDICTED: probable ATP-dependent RNA helicase DHX36-like [Cucumis sativus]
Csa3G817730	--	--	Molecular Function: binding (GO:0005488);; Biological Process: regulation of transcription, DNA-templated (GO:0006355);;	--	--	--	--	Myb-like DNA-binding domain	DNA binding protein, putative GN=RCOM_1632080 OS=Ricinus communis (Castor bean) PE=4 SV=1	S	Function unknown	PREDICTED: uncharacterized protein LOC101216059 [Cucumis sativus]
Csa2G034630	--	--	--	--	--	--	--	--	Putative uncharacterized protein GN=RCOM_1435530 OS=Ricinus communis (Castor bean) PE=4 SV=1	--	--	PREDICTED: uncharacterized protein LOC101505656 [Cicer arietinum]
Csa3G134860	--	--	Cellular Component: nucleosome (GO:0000786);; Molecular Function: DNA binding (GO:0003677);; Biological Process: nucleosome assembly (GO:0006334);;	--	--	--	--	--	Uncharacterized protein (Fragment) GN=OB04G17350 OS=Oryza brachyantha PE=4 SV=1	--	--	expressed protein [Aureococcus anophagefferens]
Csa7G447020	[E]	Amino acid transport and metabolism	Molecular Function: transporter activity (GO:0005215);; Cellular Component: plasma membrane (GO:0005886);; Biological Process: oligopeptide transport (GO:0006857);; Cellular Component: integral component of membrane (GO:0016021);;	--	--	[E]	Amino acid transport and metabolism	POT family;; Major Facilitator Superfamily	Putative uncharacterized protein GN=VIT_09s0002g04130 OS=Vitis vinifera (Grape) PE=4 SV=1	P	Inorganic ion transport and metabolism	PREDICTED: probable peptide transporter At1g52190-like [Cucumis sativus]
Csa2G378580	[R]	General function prediction only	Molecular Function: protein kinase activity (GO:0004672);; Molecular Function: ATP binding (GO:0005524);; Cellular Component: mitochondrion (GO:0005739);; Cellular Component: plasma membrane (GO:0005886);; Biological Process: protein phosphorylation (GO:0006468);; Cellular Component: plastoglobule (GO:0010287);; Biological Process: chlorophyll catabolic process (GO:0015996);; Biological Process: …	--	--	[R]	General function prediction only	ABC1 family;; Phosphotransferase enzyme family	Uncharacterized protein GN=PRUPE_ppa002350mg OS=Prunus persica (Peach) PE=4 SV=1	R	General function prediction only	PREDICTED: uncharacterized aarF domain-containing protein kinase At4g31390, chloroplastic-like [Cucumis sativus]
Csa3G149960	[G]	Carbohydrate transport and metabolism	Molecular Function: transporter activity (GO:0005215);; Biological Process: purine nucleobase transport (GO:0006863);; Cellular Component: membrane (GO:0016020);; Biological Process: borate transmembrane transport (GO:0035445);; Biological Process: single-organism transport (GO:0044765);; Molecular Function: borate transmembrane transporter activity (GO:0046715);;	K09874|1.51813e-148|cmo:103483738|probable aquaporin NIP7-1; K09874 aquaporin NIP (A)	--	[G]	Carbohydrate transport and metabolism	Major intrinsic protein	Uncharacterized protein GN=PRUPE_ppa009284mg OS=Prunus persica (Peach) PE=4 SV=1	G	Carbohydrate transport and metabolism	PREDICTED: probable aquaporin NIP7-1-like [Cucumis sativus]
Csa7G371760	[S]	Function unknown	Cellular Component: nucleus (GO:0005634);;	--	--	[S]	Function unknown	Uncharacterised ACR, COG2135	Uncharacterized protein GN=PRUPE_ppa018685mg OS=Prunus persica (Peach) PE=4 SV=1	S	Function unknown	PREDICTED: LOW QUALITY PROTEIN: UPF0361 protein C3orf37 homolog, partial [Cucumis sativus]
Csa6G124120	--	--	Biological Process: response to light stimulus (GO:0009416);; Cellular Component: chloroplast (GO:0009507);; Biological Process: response to salt stress (GO:0009651);; Biological Process: response to auxin (GO:0009733);; Biological Process: response to abscisic acid (GO:0009737);;	K14487|0|csv:101232083|probable indole-3-acetic acid-amido synthetase GH3.5-like; K14487 auxin responsive GH3 gene family (A)	Plant hormone signal transduction (ko04075)	--	--	GH3 auxin-responsive promoter	Putative uncharacterized protein OS=Populus trichocarpa (Western balsam poplar) PE=2 SV=1	R	General function prediction only	PREDICTED: probable indole-3-acetic acid-amido synthetase GH3.5-like [Cucumis sativus]
Csa3G236590	[R]	General function prediction only	Molecular Function: translation elongation factor activity (GO:0003746);; Cellular Component: nucleus (GO:0005634);; Biological Process: regulation of transcription, DNA-templated (GO:0006355);; Biological Process: translational elongation (GO:0006414);; Molecular Function: metal ion binding (GO:0046872);;	--	--	[S]	Function unknown	Transcription elongation factor Elf1 like	Putative uncharacterized protein GN=VIT_10s0003g00510 OS=Vitis vinifera (Grape) PE=4 SV=1	S	Function unknown	PREDICTED: transcription elongation factor 1 homolog [Cucumis sativus]
Csa7G341200	--	--	Biological Process: response to stimulus (GO:0050896);;	--	--	--	--	--	Putative uncharacterized protein GN=VIT_07s0185g00040 OS=Vitis vinifera (Grape) PE=4 SV=1	S	Function unknown	PREDICTED: uncharacterized protein LOC101203142 [Cucumis sativus]
Csa5G349570	--	--	Cellular Component: chloroplast (GO:0009507);;	--	--	--	--	--	Uncharacterized protein GN=PRUPE_ppa020111mg OS=Prunus persica (Peach) PE=4 SV=1	S	Function unknown	PREDICTED: uncharacterized protein LOC101215316 [Cucumis sativus]
Csa3G011090	--	--	Biological Process: metabolic process (GO:0008152);;	--	--	--	--	--	Uncharacterized protein GN=PRUPE_ppa017021mg OS=Prunus persica (Peach) PE=4 SV=1	S	Function unknown	hypothetical protein PRUPE_ppa017021mg [Prunus persica]
Csa2G264610	--	--	Cellular Component: extracellular region (GO:0005576);; Biological Process: plant-type cell wall organization (GO:0009664);; Biological Process: regulation of meristem growth (GO:0010075);; Cellular Component: anchored component of membrane (GO:0031225);; Biological Process: cell wall modification (GO:0042545);; Biological Process: anther development (GO:0048653);; Biological Process: response to…	--	--	--	--	Thaumatin family	Zeamatin, putative GN=RCOM_0446390 OS=Ricinus communis (Castor bean) PE=4 SV=1	R	General function prediction only	PREDICTED: pathogenesis-related protein 5-like [Cucumis sativus]
Csa2G055570	--	--	Cellular Component: chloroplast (GO:0009507);;	--	--	--	--	--	Uncharacterized protein GN=PGSC0003DMG400034831 OS=Solanum tuberosum (Potato) PE=4 SV=1	S	Function unknown	hypothetical protein PhapfoPp091 [Phalaenopsis aphrodite subsp. formosana]
Csa2G006820	--	--	Molecular Function: sequence-specific DNA binding transcription factor activity (GO:0003700);; Biological Process: chromatin assembly or disassembly (GO:0006333);; Biological Process: regulation of translation (GO:0006417);; Biological Process: plastid organization (GO:0009657);; Biological Process: leaf morphogenesis (GO:0009965);; Biological Process: cell differentiation (GO:0030154);; Biologic…	--	--	--	--	YABBY protein	Putative uncharacterized protein GN=VIT_11s0016g05590 OS=Vitis vinifera (Grape) PE=2 SV=1	K	Transcription	PREDICTED: axial regulator YABBY 5-like [Cucumis sativus]
CsaUNG026590	--	--	--	--	--	--	--	Plastocyanin-like domain	Predicted protein GN=POPTRDRAFT_1107304 OS=Populus trichocarpa (Western balsam poplar) PE=4 SV=1	R	General function prediction only	PREDICTED: umecyanin-like [Cucumis sativus]
Csa6G003410	--	--	Molecular Function: DNA binding (GO:0003677);;	--	--	--	--	Domain of unknown function (DUF296);; AT hook motif	Uncharacterized protein GN=PRUPE_ppa008388mg OS=Prunus persica (Peach) PE=4 SV=1	S	Function unknown	PREDICTED: uncharacterized protein LOC101203138 [Cucumis sativus]
Csa7G314940	[DZ]	Cell cycle control, cell division, chromosome partitioning;; Cytoskeleton	Molecular Function: chromatin binding (GO:0003682);; Cellular Component: extracellular region (GO:0005576);; Cellular Component: cytoplasm (GO:0005737);; Biological Process: signal transduction (GO:0007165);; Molecular Function: zinc ion binding (GO:0008270);; Molecular Function: Ran GTPase binding (GO:0008536);; Molecular Function: phosphatidylinositol binding (GO:0035091);;	--	--	--	--	Regulator of chromosome condensation (RCC1) repeat;; Transcription factor regulating root and shoot growth via Pin3;; Regulator of chromosome condensation (RCC1) repeat;; Transcription factor BRX N-terminal domain;; FYVE zinc finger;; Caenorhabditis protein of unknown function, DUF282	Ran GTPase binding protein, putative GN=RCOM_0136880 OS=Ricinus communis (Castor bean) PE=4 SV=1	S	Function unknown	PREDICTED: uncharacterized protein LOC101214149 [Cucumis sativus]
Csa6G003390	--	--	Cellular Component: extracellular region (GO:0005576);; Cellular Component: nucleus (GO:0005634);;	--	--	[R]	General function prediction only	Glycosyl transferase family 90	Putative uncharacterized protein GN=VIT_15s0046g03150 OS=Vitis vinifera (Grape) PE=4 SV=1	R	General function prediction only	PREDICTED: protein O-glucosyltransferase 1-like [Cucumis sativus]
Csa5G190510	--	--	--	--	--	--	--	--	--	--	--	PREDICTED: 60S ribosomal protein L2, mitochondrial-like [Cucumis sativus]
Csa4G000650	--	--	--	--	--	--	--	--	Putative uncharacterized protein OS=Cucumis melo subsp. melo PE=4 SV=1	S	Function unknown	PREDICTED: uncharacterized protein LOC101222672 [Cucumis sativus]
Csa2G076520	--	--	Biological Process: microtubule cytoskeleton organization (GO:0000226);; Biological Process: cytokinesis by cell plate formation (GO:0000911);; Molecular Function: nucleic acid binding (GO:0003676);; Biological Process: response to abiotic stimulus (GO:0009628);; Biological Process: gravitropism (GO:0009630);; Biological Process: vernalization response (GO:0010048);; Biological Process: single-or…	K10779|0|cmo:103485842|transcriptional regulator ATRX; K10779 transcriptional regulator ATRX [EC:3.6.4.12] (A)	--	[K]	Transcription	--	Putative uncharacterized protein GN=VIT_14s0036g01460 OS=Vitis vinifera (Grape) PE=2 SV=1	K	Transcription	PREDICTED: uncharacterized protein LOC101218346 [Cucumis sativus]
Csa1G532260	--	--	--	--	--	--	--	--	Uncharacterized protein GN=CARUB_v10024458mg OS=Capsella rubella PE=4 SV=1	--	--	uncharacterized protein [Arabidopsis thaliana]
Csa4G295450	--	--	Cellular Component: mitochondrion (GO:0005739);; Biological Process: protein N-linked glycosylation (GO:0006487);; Biological Process: response to heat (GO:0009408);; Biological Process: response to high light intensity (GO:0009644);; Cellular Component: chloroplast envelope (GO:0009941);; Biological Process: hyperosmotic salinity response (GO:0042538);; Biological Process: response to hydrogen p…	--	--	--	--	--	Putative uncharacterized protein GN=RCOM_1248090 OS=Ricinus communis (Castor bean) PE=4 SV=1	S	Function unknown	PREDICTED: uncharacterized protein LOC101215206 isoform 1 [Cucumis sativus]
Csa3G110660	[F]	Nucleotide transport and metabolism	Molecular Function: phosphoribosylamine-glycine ligase activity (GO:0004637);; Molecular Function: ATP binding (GO:0005524);; Biological Process: purine nucleotide biosynthetic process (GO:0006164);; Biological Process: purine nucleobase biosynthetic process (GO:0009113);; Cellular Component: chloroplast stroma (GO:0009570);; Molecular Function: metal ion binding (GO:0046872);;	K01945|0|csv:101209253|phosphoribosylamine--glycine ligase, chloroplastic-like; K01945 phosphoribosylamine--glycine ligase [EC:6.3.4.13] (A)	Purine metabolism (ko00230)	[F]	Nucleotide transport and metabolism	Phosphoribosylglycinamide synthetase, ATP-grasp (A) domain;; Phosphoribosylglycinamide synthetase, N domain;; Phosphoribosylglycinamide synthetase, C domain;; ATP-grasp domain;; ATP-grasp domain	Putative uncharacterized protein GN=VIT_12s0028g00260 OS=Vitis vinifera (Grape) PE=3 SV=1	F	Nucleotide transport and metabolism	PREDICTED: phosphoribosylamine--glycine ligase, chloroplastic-like [Cucumis sativus]
Csa4G000840	--	--	Molecular Function: hydrolase activity (GO:0016787);; Cellular Component: cell part (GO:0044464);;	--	--	--	--	--	Putative uncharacterized protein GN=RCOM_0175590 OS=Ricinus communis (Castor bean) PE=4 SV=1	S	Function unknown	conserved hypothetical protein [Ricinus communis]
Csa6G497240	--	--	Cellular Component: nucleus (GO:0005634);; Cellular Component: plasma membrane (GO:0005886);;	--	--	--	--	--	Uncharacterized protein GN=PRUPE_ppa013265mg OS=Prunus persica (Peach) PE=4 SV=1	S	Function unknown	PREDICTED: uncharacterized protein At5g65660-like [Cucumis sativus]
Csa5G154850	[J]	Translation, ribosomal structure and biogenesis	Molecular Function: RNA binding (GO:0003723);; Biological Process: pentose-phosphate shunt (GO:0006098);; Biological Process: phosphatidylglycerol biosynthetic process (GO:0006655);; Biological Process: aromatic amino acid family biosynthetic process (GO:0009073);; Cellular Component: chloroplast (GO:0009507);; Biological Process: chloroplast relocation (GO:0009902);; Biological Process: thylakoi…	--	--	--	--	S1 RNA binding domain	Putative uncharacterized protein GN=VIT_02s0025g03970 OS=Vitis vinifera (Grape) PE=4 SV=1	A	RNA processing and modification	PREDICTED: uncharacterized protein LOC101217667 [Cucumis sativus]
Csa2G308360	--	--	Cellular Component: cell wall (GO:0005618);; Biological Process: carbohydrate metabolic process (GO:0005975);; Molecular Function: beta-glucosidase activity (GO:0008422);; Cellular Component: plant-type cell wall (GO:0009505);; Cellular Component: plasmodesma (GO:0009506);; Cellular Component: chloroplast (GO:0009507);; Biological Process: regulation of meristem growth (GO:0010075);; Cellular Com…	--	--	--	--	Glycosyl hydrolase family 3 N terminal domain;; Glycosyl hydrolase family 3 C-terminal domain;; Fibronectin type III-like domain	Uncharacterized protein GN=PRUPE_ppa001675mg OS=Prunus persica (Peach) PE=4 SV=1	R	General function prediction only	PREDICTED: probable beta-D-xylosidase 7-like [Cucumis sativus]
Csa5G181470	[R]	General function prediction only	Cellular Component: mitochondrion (GO:0005739);; Molecular Function: RNA methyltransferase activity (GO:0008173);; Biological Process: chloroplast organization (GO:0009658);; Biological Process: tRNA methylation (GO:0030488);; Biological Process: protein targeting to chloroplast (GO:0045036);; Molecular Function: iron-sulfur cluster binding (GO:0051536);; Biological Process: rRNA base methylation…	K06941|0|csv:101221561|probable dual-specificity RNA methyltransferase RlmN-like; K06941 23S rRNA (adenine2503-C2)-methyltransferase [EC:2.1.1.192] (A)	--	--	--	Radical SAM superfamily	Catalytic, putative GN=RCOM_0000920 OS=Ricinus communis (Castor bean) PE=3 SV=1	R	General function prediction only	PREDICTED: probable dual-specificity RNA methyltransferase RlmN-like [Cucumis sativus]
Csa1G045460	--	--	Molecular Function: metal ion binding (GO:0046872);;	--	--	[O]	Posttranslational modification, protein turnover, chaperones	Ring finger domain;; RING-H2 zinc finger;; Zinc finger, C3HC4 type (RING finger);; Zinc finger, C3HC4 type (RING finger);; Anaphase-promoting complex subunit 11 RING-H2 finger;; Zinc finger, C3HC4 type (RING finger)	Uncharacterized protein (Fragment) GN=PRUPE_ppa016054mg OS=Prunus persica (Peach) PE=4 SV=1	O	Posttranslational modification, protein turnover, chaperones	PREDICTED: uncharacterized protein LOC101217869 [Cucumis sativus]
Csa1G042280	--	--	Biological Process: single-organism transport (GO:0044765);; Biological Process: organic substance transport (GO:0071702);;	--	--	--	--	--	Uncharacterized protein GN=Bathy13g00290 OS=Bathycoccus prasinos PE=4 SV=1	--	--	predicted protein [Bathycoccus prasinos]
Csa5G503560	[E]	Amino acid transport and metabolism	Molecular Function: leukotriene-A4 hydrolase activity (GO:0004463);; Cellular Component: cytosol (GO:0005829);; Biological Process: DNA replication (GO:0006260);; Biological Process: DNA methylation (GO:0006306);; Biological Process: proteolysis (GO:0006508);; Molecular Function: metallopeptidase activity (GO:0008237);; Molecular Function: zinc ion binding (GO:0008270);; Biological Process: cell …	K01254|0|csv:101222193|leukotriene A-4 hydrolase homolog; K01254 leukotriene-A4 hydrolase [EC:3.3.2.6] (A)	Arachidonic acid metabolism (ko00590)	[IOVE]	Lipid transport and metabolism;; Posttranslational modification, protein turnover, chaperones;; Defense mechanisms;; Amino acid transport and metabolism	Peptidase family M1;; Leukotriene A4 hydrolase, C-terminal;; Peptidase MA superfamily	Predicted protein GN=POPTRDRAFT_567536 OS=Populus trichocarpa (Western balsam poplar) PE=4 SV=1	EIOV	Amino acid transport and metabolism;; Lipid transport and metabolism;; Posttranslational modification, protein turnover, chaperones;; Defense mechanisms	PREDICTED: leukotriene A-4 hydrolase homolog [Cucumis sativus]
Csa5G157410	[Z]	Cytoskeleton	Molecular Function: microtubule motor activity (GO:0003777);; Molecular Function: transmembrane receptor protein serine/threonine kinase activity (GO:0004675);; Molecular Function: ATP binding (GO:0005524);; Cellular Component: vacuole (GO:0005773);; Cellular Component: kinesin complex (GO:0005871);; Cellular Component: microtubule (GO:0005874);; Cellular Component: plasma membrane (GO:0005886);;…	--	--	[Z]	Cytoskeleton	Kinesin motor domain;; Armadillo/beta-catenin-like repeat;; HEAT repeats;; Armadillo-like	Uncharacterized protein GN=PRUPE_ppa001070mg OS=Prunus persica (Peach) PE=4 SV=1	Z	Cytoskeleton	PREDICTED: armadillo repeat-containing kinesin-like protein 3-like [Cucumis sativus]
Csa3G119260	--	--	Molecular Function: binding (GO:0005488);;	--	--	[C]	Energy production and conversion	Cytochrome b5-like Heme/Steroid binding domain	Uncharacterized protein GN=PRUPE_ppa013234mg OS=Prunus persica (Peach) PE=4 SV=1	CI	Energy production and conversion;; Lipid transport and metabolism	PREDICTED: cytochrome b5-like [Cucumis sativus]
Csa2G370580	--	--	Cellular Component: nucleus (GO:0005634);;	--	--	--	--	Domain of unknown function (DUF296)	Uncharacterized protein OS=Glycine max (Soybean) PE=4 SV=1	S	Function unknown	PREDICTED: putative DNA-binding protein ESCAROLA-like [Cucumis sativus]
Csa1G570210	--	--	Biological Process: RNA methylation (GO:0001510);; Biological Process: developmental process involved in reproduction (GO:0003006);; Cellular Component: nucleus (GO:0005634);; Cellular Component: cytosol (GO:0005829);; Biological Process: multicellular organismal development (GO:0007275);; Biological Process: pyrimidine ribonucleotide biosynthetic process (GO:0009220);; Biological Process: single…	K14820|5.98893e-68|cmo:103492188|ribosome biogenesis protein BRX1-like; K14820 ribosome biogenesis protein BRX1 (A)	--	[J]	Translation, ribosomal structure and biogenesis	--	Brix domain-containing protein GN=ARALYDRAFT_897837 OS=Arabidopsis lyrata subsp. lyrata (Lyre-leaved rock-cress) PE=4 SV=1	J	Translation, ribosomal structure and biogenesis	PREDICTED: ribosome biogenesis protein BRX1 homolog, partial [Cucumis sativus]
Csa7G044220	--	--	Cellular Component: nucleus (GO:0005634);; Biological Process: photorespiration (GO:0009853);;	--	--	--	--	--	Uncharacterized protein GN=PRUPE_ppa014089mg OS=Prunus persica (Peach) PE=4 SV=1	S	Function unknown	hypothetical protein PRUPE_ppa014089mg [Prunus persica]
Csa1G660190	--	--	Molecular Function: methyltransferase activity (GO:0008168);; Biological Process: methylation (GO:0032259);;	--	--	--	--	--	Uncharacterized protein GN=PRUPE_ppa008463mg OS=Prunus persica (Peach) PE=4 SV=1	S	Function unknown	PREDICTED: uncharacterized protein LOC101219568 [Cucumis sativus]
Csa2G361800	[R]	General function prediction only	Molecular Function: carbonate dehydratase activity (GO:0004089);; Cellular Component: mitochondrial respiratory chain complex I (GO:0005747);; Biological Process: pentose-phosphate shunt (GO:0006098);; Biological Process: ubiquitin-dependent protein catabolic process (GO:0006511);; Biological Process: response to salt stress (GO:0009651);; Biological Process: photorespiration (GO:0009853);; Molec…	--	--	--	--	Bacterial transferase hexapeptide (six repeats);; Hexapeptide repeat of succinyl-transferase	Putative uncharacterized protein GN=VIT_18s0001g12730 OS=Vitis vinifera (Grape) PE=4 SV=1	S	Function unknown	PREDICTED: gamma carbonic anhydrase 1, mitochondrial-like [Cucumis sativus]
Csa1G031820	[IQR]	Lipid transport and metabolism;; Secondary metabolites biosynthesis, transport and catabolism;; General function prediction only	Molecular Function: nucleotide binding (GO:0000166);; Cellular Component: nucleus (GO:0005634);; Cellular Component: endoplasmic reticulum (GO:0005783);; Biological Process: meristem maintenance (GO:0010073);; Biological Process: xylem development (GO:0010089);; Molecular Function: protochlorophyllide reductase activity (GO:0016630);; Biological Process: cell wall macromolecule metabolic process …	--	--	[Q]	Secondary metabolites biosynthesis, transport and catabolism	short chain dehydrogenase;; KR domain;; Enoyl-(Acyl carrier protein) reductase	Uncharacterized protein GN=PRUPE_ppa007218mg OS=Prunus persica (Peach) PE=4 SV=1	Q	Secondary metabolites biosynthesis, transport and catabolism	PREDICTED: WW domain-containing oxidoreductase-like [Cucumis sativus]
Csa6G401320	[LR]	Replication, recombination and repair;; General function prediction only	Cellular Component: mitochondrion (GO:0005739);; Molecular Function: hydrolase activity (GO:0016787);;	K07766|2.53561e-75|csv:101227767|nudix hydrolase 16, mitochondrial-like; K07766 diphosphoinositol-polyphosphate diphosphatase [EC:3.6.1.52] (A)	--	[T]	Signal transduction mechanisms	NUDIX domain	Uncharacterized protein GN=PRUPE_ppa012156mg OS=Prunus persica (Peach) PE=4 SV=1	T	Signal transduction mechanisms	PREDICTED: nudix hydrolase 16, mitochondrial-like, partial [Cucumis sativus]
Csa3G698470	[R]	General function prediction only	Molecular Function: GTP binding (GO:0005525);; Cellular Component: Golgi apparatus (GO:0005794);; Cellular Component: plasma membrane (GO:0005886);; Biological Process: small GTPase mediated signal transduction (GO:0007264);; Biological Process: plant-type cell wall modification (GO:0009827);; Biological Process: protein transport (GO:0015031);; Biological Process: vesicle-mediated transport (GO:…	K07904|4.42106e-157|csv:101206955|ras-related protein RABA4c-like; K07904 Ras-related protein Rab-11A (A)	Endocytosis (ko04144)	[U]	Intracellular trafficking, secretion, and vesicular transport	Ras family;; Miro-like protein;; ADP-ribosylation factor family;; 50S ribosome-binding GTPase	Uncharacterized protein GN=PRUPE_ppa011105mg OS=Prunus persica (Peach) PE=4 SV=1	U	Intracellular trafficking, secretion, and vesicular transport	PREDICTED: ras-related protein RABA4c-like [Cucumis sativus]
Csa3G875420	[QR]	Secondary metabolites biosynthesis, transport and catabolism;; General function prediction only	Molecular Function: sterol 24-C-methyltransferase activity (GO:0003838);; Cellular Component: endoplasmic reticulum (GO:0005783);; Cellular Component: Golgi apparatus (GO:0005794);; Cellular Component: cytosol (GO:0005829);; Biological Process: glucose catabolic process (GO:0006007);; Biological Process: acetyl-CoA metabolic process (GO:0006084);; Biological Process: multidimensional cell growth …	K08242|0|csv:101227007|24-methylenesterol C-methyltransferase 2-like; K08242 24-methylenesterol C-methyltransferase [EC:2.1.1.143] (A)	Steroid biosynthesis (ko00100)	[IR]	Lipid transport and metabolism;; General function prediction only	Methyltransferase domain;; Methyltransferase domain;; Mycolic acid cyclopropane synthetase;; Sterol methyltransferase C-terminal;; Methyltransferase domain;; ubiE/COQ5 methyltransferase family;; Methyltransferase domain;; Methyltransferase domain;; Methyltransferase domain;; Methyltransferase domain	24-sterol C-methyltransferase GN=SMT2-2 OS=Gossypium hirsutum (Upland cotton) PE=2 SV=1	I	Lipid transport and metabolism	PREDICTED: 24-methylenesterol C-methyltransferase 2-like [Cucumis sativus]
Csa4G308490	--	--	Cellular Component: cytoplasm (GO:0005737);; Molecular Function: transferase activity, transferring acyl groups other than amino-acyl groups (GO:0016747);;	--	--	--	--	Transferase family	Predicted protein GN=POPTRDRAFT_560885 OS=Populus trichocarpa (Western balsam poplar) PE=4 SV=1	S	Function unknown	PREDICTED: BAHD acyltransferase DCR-like [Cucumis sativus]
Csa4G643070	--	--	Molecular Function: sequence-specific DNA binding transcription factor activity (GO:0003700);; Cellular Component: plasma membrane (GO:0005886);; Biological Process: regulation of transcription, DNA-templated (GO:0006355);; Biological Process: membrane fusion (GO:0006944);; Molecular Function: zinc ion binding (GO:0008270);; Molecular Function: actin filament binding (GO:0051015);; Biological Pro…	--	--	[TZ]	Signal transduction mechanisms;; Cytoskeleton	LIM domain	Putative uncharacterized protein GN=VIT_18s0001g09040 OS=Vitis vinifera (Grape) PE=4 SV=1	TZ	Signal transduction mechanisms;; Cytoskeleton	PREDICTED: pollen-specific protein SF3-like [Cucumis sativus]
Csa2G271390	--	--	--	--	--	--	--	Protein of unknown function (DUF632);; Protein of unknown function (DUF630)	Putative uncharacterized protein GN=RCOM_0977480 OS=Ricinus communis (Castor bean) PE=4 SV=1	S	Function unknown	PREDICTED: uncharacterized protein LOC101207270 [Cucumis sativus]
Csa6G197210	--	--	--	--	--	--	--	Spt5 C-terminal nonapeptide repeat binding Spt4	Uncharacterized protein GN=PRUPE_ppa001271mg OS=Prunus persica (Peach) PE=4 SV=1	S	Function unknown	PREDICTED: uncharacterized protein LOC101232002 [Cucumis sativus]
Csa2G405030	--	--	Molecular Function: structural constituent of ribosome (GO:0003735);; Molecular Function: structural constituent of cytoskeleton (GO:0005200);; Molecular Function: ATP binding (GO:0005524);; Cellular Component: Arp2/3 protein complex (GO:0005885);; Biological Process: translation (GO:0006412);; Biological Process: nucleotide biosynthetic process (GO:0009165);; Biological Process: multidimensional…	K17260|0|csv:101213341|actin-related protein 2-like; K17260 actin-related protein 2 (A)	--	[Z]	Cytoskeleton	Actin	Actin GN=ACT OS=Camellia oleifera PE=2 SV=1	Z	Cytoskeleton	PREDICTED: actin-related protein 2-like [Cucumis sativus]
Csa3G878880	[C]	Energy production and conversion	Cellular Component: vacuole (GO:0005773);; Molecular Function: hydrogen ion transmembrane transporter activity (GO:0015078);; Biological Process: ATP hydrolysis coupled proton transport (GO:0015991);; Cellular Component: integral component of membrane (GO:0016021);; Cellular Component: proton-transporting V-type ATPase, V0 domain (GO:0033179);;	K03661|6.5464e-108|csv:101225922|V-type proton ATPase 21 kDa proteolipid subunit-like; K03661 V-type H+-transporting ATPase 21kDa proteolipid subunit (A)	Oxidative phosphorylation (ko00190);; Phagosome (ko04145)	[C]	Energy production and conversion	ATP synthase subunit C	Predicted protein GN=POPTRDRAFT_561839 OS=Populus trichocarpa (Western balsam poplar) PE=2 SV=1	C	Energy production and conversion	PREDICTED: V-type proton ATPase 21 kDa proteolipid subunit-like [Cucumis sativus]
Csa3G198470	[GEPR]	Carbohydrate transport and metabolism;; Amino acid transport and metabolism;; Inorganic ion transport and metabolism;; General function prediction only	Molecular Function: sugar:proton symporter activity (GO:0005351);; Cellular Component: plasma membrane (GO:0005886);; Biological Process: protein targeting to membrane (GO:0006612);; Biological Process: amino acid transport (GO:0006865);; Biological Process: ethylene biosynthetic process (GO:0009693);; Biological Process: plant-type cell wall modification (GO:0009827);; Biological Process: pollen…	--	--	[R]	General function prediction only	Sugar (and other) transporter;; Major Facilitator Superfamily	Putative uncharacterized protein GN=VIT_09s0054g01610 OS=Vitis vinifera (Grape) PE=4 SV=1	R	General function prediction only	PREDICTED: organic cation/carnitine transporter 7-like [Cucumis sativus]
Csa3G639040	[LKJ]	Replication, recombination and repair;; Transcription;; Translation, ribosomal structure and biogenesis	Biological Process: RNA methylation (GO:0001510);; Molecular Function: nucleic acid binding (GO:0003676);; Molecular Function: ATP binding (GO:0005524);; Cellular Component: nucleus (GO:0005634);; Cellular Component: cytosol (GO:0005829);; Molecular Function: ATP-dependent helicase activity (GO:0008026);; Molecular Function: zinc ion binding (GO:0008270);; Biological Process: ribosome biogenesis …	K14811|0|csv:101220294|DEAD-box ATP-dependent RNA helicase 5-like; K14811 ATP-dependent RNA helicase DBP3 [EC:3.6.4.13] (A)	--	[A]	RNA processing and modification	DEAD/DEAH box helicase;; Helicase conserved C-terminal domain	Uncharacterized protein GN=PRUPE_ppa003892mg OS=Prunus persica (Peach) PE=4 SV=1	A	RNA processing and modification	PREDICTED: DEAD-box ATP-dependent RNA helicase 5-like [Cucumis sativus]
Csa4G334120	[RTKL]	General function prediction only;; Signal transduction mechanisms;; Transcription;; Replication, recombination and repair	Molecular Function: protein kinase activity (GO:0004672);; Molecular Function: ATP binding (GO:0005524);; Cellular Component: plasma membrane (GO:0005886);; Biological Process: protein phosphorylation (GO:0006468);; Biological Process: autophagy (GO:0006914);;	--	--	[T]	Signal transduction mechanisms	Protein tyrosine kinase;; Protein kinase domain	Uncharacterized protein OS=Glycine max (Soybean) PE=4 SV=1	T	Signal transduction mechanisms	PREDICTED: probable receptor-like protein kinase At5g15080-like [Cucumis sativus]
Csa4G288070	--	--	Biological Process: cellular amino acid metabolic process (GO:0006520);; Biological Process: fatty acid biosynthetic process (GO:0006633);; Biological Process: cellular aromatic compound metabolic process (GO:0006725);; Biological Process: coenzyme metabolic process (GO:0006732);; Biological Process: sulfur compound metabolic process (GO:0006790);; Biological Process: response to stress (GO:00069…	K00454|2.82932e-131|csv:101232475|linoleate 13S-lipoxygenase 2-1, chloroplastic-like; K00454 lipoxygenase [EC:1.13.11.12] (A)	Linoleic acid metabolism (ko00591);; alpha-Linolenic acid metabolism (ko00592)	--	--	Lipoxygenase;; PLAT/LH2 domain	Predicted protein GN=POPTRDRAFT_940698 OS=Populus trichocarpa (Western balsam poplar) PE=4 SV=1	E	Amino acid transport and metabolism	PREDICTED: linoleate 13S-lipoxygenase 2-1, chloroplastic-like [Cucumis sativus]
Csa6G511670	--	--	Biological Process: calcium ion transport (GO:0006816);; Biological Process: Golgi organization (GO:0007030);; Biological Process: response to salt stress (GO:0009651);; Molecular Function: ligase activity (GO:0016874);;	--	--	[S]	Function unknown	Armadillo/beta-catenin-like repeat;; HEAT repeats;; HEAT-like repeat;; Neurochondrin;; Armadillo-like	Ubiquitin-protein ligase, putative GN=RCOM_1274640 OS=Ricinus communis (Castor bean) PE=4 SV=1	S	Function unknown	PREDICTED: U-box domain-containing protein 4-like [Cucumis sativus]
Csa5G139300	[R]	General function prediction only	Molecular Function: fatty-acyl-CoA binding (GO:0000062);; Molecular Function: protein binding (GO:0005515);; Cellular Component: endoplasmic reticulum (GO:0005783);; Cellular Component: plasma membrane (GO:0005886);; Biological Process: lipid metabolic process (GO:0006629);; Biological Process: lipid transport (GO:0006869);; Biological Process: ER to Golgi vesicle-mediated transport (GO:0006888);…	--	--	[I]	Lipid transport and metabolism	Acyl CoA binding protein;; Ankyrin repeats (many copies);; Ankyrin repeat;; Ankyrin repeats (3 copies);; Ankyrin repeats (many copies);; Ankyrin repeat	Uncharacterized protein GN=PRUPE_ppa007917mg OS=Prunus persica (Peach) PE=4 SV=1	I	Lipid transport and metabolism	PREDICTED: acyl-CoA-binding domain-containing protein 2-like [Cucumis sativus]
Csa1G561960	--	--	--	--	--	--	--	--	Predicted protein (Fragment) GN=POPTRDRAFT_240371 OS=Populus trichocarpa (Western balsam poplar) PE=4 SV=1	S	Function unknown	predicted protein [Populus trichocarpa]
Csa1G046870	--	--	Molecular Function: binding (GO:0005488);; Cellular Component: cytoplasm (GO:0005737);;	K17987|0|csv:101205935|uncharacterized LOC101205935; K17987 next to BRCA1 gene 1 protein (A)	--	[S]	Function unknown	PB1 domain;; Zinc finger, ZZ type;; UBA/TS-N domain	Uncharacterized protein GN=PRUPE_ppa001688mg OS=Prunus persica (Peach) PE=4 SV=1	R	General function prediction only	PREDICTED: uncharacterized protein LOC101205935 [Cucumis sativus]
Csa5G611710	[V]	Defense mechanisms	Molecular Function: ATP binding (GO:0005524);; Biological Process: ATP catabolic process (GO:0006200);; Biological Process: transport (GO:0006810);; Cellular Component: chloroplast envelope (GO:0009941);; Molecular Function: organic phosphonate transmembrane-transporting ATPase activity (GO:0015416);; Cellular Component: membrane (GO:0016020);; Cellular Component: ATP-binding cassette (ABC) trans…	--	--	[Q]	Secondary metabolites biosynthesis, transport and catabolism	ABC-2 type transporter;; ABC transporter;; AAA domain;; Rad17 cell cycle checkpoint protein	Putative uncharacterized protein GN=VIT_01s0011g04670 OS=Vitis vinifera (Grape) PE=3 SV=1	Q	Secondary metabolites biosynthesis, transport and catabolism	PREDICTED: ABC transporter G family member 7-like [Cucumis sativus]
Csa3G017070	[TZDR]	Signal transduction mechanisms;; Cytoskeleton;; Cell cycle control, cell division, chromosome partitioning;; General function prediction only	Biological Process: MAPK cascade (GO:0000165);; Molecular Function: calcium ion binding (GO:0005509);; Cellular Component: cytoplasm (GO:0005737);; Cellular Component: plasma membrane (GO:0005886);; Biological Process: protein targeting to membrane (GO:0006612);; Cellular Component: protein serine/threonine phosphatase complex (GO:0008287);; Biological Process: response to cold (GO:0009409);; Bio…	K06268|9.40629e-154|csv:101207677|calcineurin B-like protein 1-like; K06268 serine/threonine-protein phosphatase 2B regulatory subunit (A)	--	[T]	Signal transduction mechanisms	EF hand;; EF-hand domain;; EF-hand domain pair;; EF hand;; EF-hand domain pair	Calcineurin B-like protein 01 GN=CBL01 OS=Vitis vinifera (Grape) PE=2 SV=1	T	Signal transduction mechanisms	PREDICTED: calcineurin B-like protein 1-like [Cucumis sativus]
Csa7G236260	--	--	--	--	--	--	--	--	--	--	--	PREDICTED: molybdate transporter 1-like [Cucumis sativus]
[truncated: 20,723 more rows]
