# Supplementary material for: Comparative transcriptomic analyses of powdery mildew resistant and susceptible cultivated cucumber ( Cucumis sativus L.) varieties to identify the genes involved in the resistance to Sphaerotheca fuliginea infection
Source: PeerJ journal article supplement (doi:10.7717/peerj.8250), 2020-04-17
Supplement: Table_S5.xlsx [file Table_S5.xlsx]

## Sheet: Cucumber_Gene.Result_extract_cl
Table S5 The GO classifications of all identified genes.
#GO_classify1	GO_classify level2	Cucumber Unigene	GO accession
cellular component	extracellular region	1032	GO:0005576
cellular component	cell	11863	GO:0005623
cellular component	nucleoid	23	GO:0009295
cellular component	membrane	4974	GO:0016020
cellular component	virion	8	GO:0019012
cellular component	cell junction	645	GO:0030054
cellular component	extracellular matrix	18	GO:0031012
cellular component	membrane-enclosed lumen	258	GO:0031974
cellular component	macromolecular complex	1810	GO:0032991
cellular component	organelle	9459	GO:0043226
cellular component	extracellular matrix part	6	GO:0031012
cellular component	extracellular region part	15	GO:0044421
cellular component	organelle part	3249	GO:0044422
cellular component	virion part	8	GO:0044423
cellular component	membrane part	1910	GO:0044425
cellular component	cell part	11968	GO:0044464
molecular function	protein binding transcription factor activity	46	GO:0005515
molecular function	nucleic acid binding transcription factor activity	507	GO:0003700
molecular function	catalytic activity	8243	GO:0003824
molecular function	receptor activity	118	GO:0004872
molecular function	guanyl-nucleotide exchange factor activity	28	GO:0005085
molecular function	structural molecule activity	427	GO:0005198
molecular function	transporter activity	1175	GO:0005215
molecular function	binding	7778	GO:0005488
molecular function	electron carrier activity	316	GO:0009055
molecular function	antioxidant activity	150	GO:0016209
molecular function	channel regulator activity	1	GO:0016247
molecular function	metallochaperone activity	7	GO:0016530
molecular function	enzyme regulator activity	182	GO:0030234
molecular function	protein tag	3	GO:0031386
molecular function	translation regulator activity	2	GO:0045182
molecular function	nutrient reservoir activity	38	GO:0045735
molecular function	molecular transducer activity	252	GO:0060089
biological process	reproduction	487	GO:0000003
biological process	cell killing	4	GO:0001906
biological process	immune system process	518	GO:0002376
biological process	metabolic process	11083	GO:0008152
biological process	cellular process	10299	GO:0009987
biological process	reproductive process	1571	GO:0022414
biological process	biological adhesion	101	GO:0022610
biological process	signaling	1254	GO:0023052
biological process	multicellular organismal process	2307	GO:0032501
biological process	developmental process	3043	GO:0032502
biological process	growth	603	GO:0040007
biological process	locomotion	35	GO:0040011
biological process	single-organism process	9493	GO:0044699
biological process	biological phase	61	GO:0044848
biological process	rhythmic process	73	GO:0048511
biological process	response to stimulus	5402	GO:0050896
biological process	localization	3110	GO:0051179
biological process	multi-organism process	1137	GO:0051704
biological process	biological regulation	4687	GO:0065007
biological process	cellular component organization or biogenesis	3147	GO:0071840
