# Supplementary material for: Comparative transcriptomic analyses of powdery mildew resistant and susceptible cultivated cucumber ( Cucumis sativus L.) varieties to identify the genes involved in the resistance to Sphaerotheca fuliginea infection
Source: PeerJ journal article supplement (doi:10.7717/peerj.8250), 2020-04-17
Supplement: Table_S6.xlsx [file Table_S6.xlsx]

## Sheet: Sheet1
Table S6 KEGG classifications of all identified genes.
#pathway	pathway_id	Gene_number
Glycolysis / Gluconeogenesis	ko00010	113
Citrate cycle (TCA cycle)	ko00020	48
Pentose phosphate pathway	ko00030	44
Pentose and glucuronate interconversions	ko00040	104
Fructose and mannose metabolism	ko00051	50
Galactose metabolism	ko00052	56
Ascorbate and aldarate metabolism	ko00053	40
Fatty acid biosynthesis	ko00061	37
Fatty acid elongation	ko00062	22
Fatty acid degradation	ko00071	38
Synthesis and degradation of ketone bodies	ko00072	5
Cutin, suberine and wax biosynthesis	ko00073	26
Steroid biosynthesis	ko00100	24
Ubiquinone and other terpenoid-quinone biosynthesis	ko00130	38
Oxidative phosphorylation	ko00190	110
Photosynthesis	ko00195	48
Photosynthesis - antenna proteins	ko00196	19
Purine metabolism	ko00230	142
Caffeine metabolism	ko00232	2
Pyrimidine metabolism	ko00240	113
Alanine, aspartate and glutamate metabolism	ko00250	51
Glycine, serine and threonine metabolism	ko00260	70
Cysteine and methionine metabolism	ko00270	85
Valine, leucine and isoleucine degradation	ko00280	38
Valine, leucine and isoleucine biosynthesis	ko00290	17
Lysine biosynthesis	ko00300	12
Lysine degradation	ko00310	24
Arginine and proline metabolism	ko00330	75
Histidine metabolism	ko00340	17
Tyrosine metabolism	ko00350	35
Phenylalanine metabolism	ko00360	126
Tryptophan metabolism	ko00380	29
Phenylalanine, tyrosine and tryptophan biosynthesis	ko00400	44
beta-Alanine metabolism	ko00410	45
Taurine and hypotaurine metabolism	ko00430	11
Selenocompound metabolism	ko00450	17
Cyanoamino acid metabolism	ko00460	66
Glutathione metabolism	ko00480	80
Starch and sucrose metabolism	ko00500	207
N-Glycan biosynthesis	ko00510	42
Other glycan degradation	ko00511	18
Other types of O-glycan biosynthesis	ko00514	6
Amino sugar and nucleotide sugar metabolism	ko00520	110
Polyketide sugar unit biosynthesis	ko00523	2
Glycosaminoglycan degradation	ko00531	19
Glycerolipid metabolism	ko00561	50
Inositol phosphate metabolism	ko00562	67
Glycosylphosphatidylinositol(GPI)-anchor biosynthesis	ko00563	21
Glycerophospholipid metabolism	ko00564	84
Ether lipid metabolism	ko00565	28
Arachidonic acid metabolism	ko00590	14
Linoleic acid metabolism	ko00591	46
alpha-Linolenic acid metabolism	ko00592	64
Sphingolipid metabolism	ko00600	28
Glycosphingolipid biosynthesis - globo series	ko00603	8
Glycosphingolipid biosynthesis - ganglio series	ko00604	4
Pyruvate metabolism	ko00620	79
Glyoxylate and dicarboxylate metabolism	ko00630	55
Propanoate metabolism	ko00640	26
Butanoate metabolism	ko00650	22
C5-Branched dibasic acid metabolism	ko00660	8
One carbon pool by folate	ko00670	15
Carbon fixation in photosynthetic organisms	ko00710	67
Thiamine metabolism	ko00730	11
Riboflavin metabolism	ko00740	9
Vitamin B6 metabolism	ko00750	11
Nicotinate and nicotinamide metabolism	ko00760	15
Pantothenate and CoA biosynthesis	ko00770	25
Biotin metabolism	ko00780	15
Lipoic acid metabolism	ko00785	4
Folate biosynthesis	ko00790	20
Porphyrin and chlorophyll metabolism	ko00860	42
Terpenoid backbone biosynthesis	ko00900	51
Monoterpenoid biosynthesis	ko00902	7
Limonene and pinene degradation	ko00903	9
Diterpenoid biosynthesis	ko00904	35
Brassinosteroid biosynthesis	ko00905	16
Carotenoid biosynthesis	ko00906	32
Zeatin biosynthesis	ko00908	21
Sesquiterpenoid and triterpenoid biosynthesis	ko00909	14
Nitrogen metabolism	ko00910	37
Sulfur metabolism	ko00920	33
Phenylpropanoid biosynthesis	ko00940	175
Flavonoid biosynthesis	ko00941	24
Flavone and flavonol biosynthesis	ko00944	1
Stilbenoid, diarylheptanoid and gingerol biosynthesis	ko00945	20
Isoquinoline alkaloid biosynthesis	ko00950	16
Tropane, piperidine and pyridine alkaloid biosynthesis	ko00960	20
Aminoacyl-tRNA biosynthesis	ko00970	55
Biosynthesis of unsaturated fatty acids	ko01040	43
Carbon metabolism	ko01200	211
2-Oxocarboxylic acid metabolism	ko01210	56
Fatty acid metabolism	ko01212	81
Degradation of aromatic compounds	ko01220	15
Biosynthesis of amino acids	ko01230	215
Vancomycin resistance	ko01502	2
ABC transporters	ko02010	32
Ribosome biogenesis in eukaryotes	ko03008	83
Ribosome	ko03010	293
RNA transport	ko03013	156
mRNA surveillance pathway	ko03015	105
RNA degradation	ko03018	98
RNA polymerase	ko03020	45
Basal transcription factors	ko03022	40
DNA replication	ko03030	48
Spliceosome	ko03040	155
Proteasome	ko03050	48
Protein export	ko03060	43
Base excision repair	ko03410	39
Nucleotide excision repair	ko03420	60
Mismatch repair	ko03430	37
Homologous recombination	ko03440	48
Non-homologous end-joining	ko03450	8
Phosphatidylinositol signaling system	ko04070	58
Plant hormone signal transduction	ko04075	278
Ubiquitin mediated proteolysis	ko04120	105
Sulfur relay system	ko04122	11
SNARE interactions in vesicular transport	ko04130	41
Regulation of autophagy	ko04140	35
Protein processing in endoplasmic reticulum	ko04141	177
Endocytosis	ko04144	113
Phagosome	ko04145	67
Peroxisome	ko04146	75
Plant-pathogen interaction	ko04626	116
Circadian rhythm - plant	ko04712	33
