# Supplementary material for: Comparative transcriptomic analyses of powdery mildew resistant and susceptible cultivated cucumber ( Cucumis sativus L.) varieties to identify the genes involved in the resistance to Sphaerotheca fuliginea infection
Source: PeerJ journal article supplement (doi:10.7717/peerj.8250), 2020-04-17
Supplement: Table_S7.xlsx [file Table_S7.xlsx]

## Sheet: Sheet1
Table S7 The GO enrichment analysisof the DEGs in the RT vs RC comparison.
GO.ID	Term	Annotated	Significant	P value	Category
GO:0031408	oxylipin biosynthetic process	47	3	2.7e-08	biological process
GO:0010264	myo-inositol hexakisphosphate biosynthetic process	55	24	4.3e-08	biological process
GO:0009644	response to high light intensity	184	32	5.3e-05	biological process
GO:0051762	sesquiterpene biosynthetic process	10	0	0.00013	biological process
GO:0006814	sodium ion transport	35	4	0.00065	biological process
GO:0009737	response to abscisic acid	497	47	0.00087	biological process
GO:0000302	response to reactive oxygen species	309	37	0.00091	biological process
GO:0006546	glycine catabolic process	44	4	0.0015	biological process
GO:0042538	hyperosmotic salinity response	122	14	0.00151	biological process
GO:0042401	cellular biogenic amine biosynthetic process	38	3	0.00153	biological process
GO:0010325	raffinose family oligosaccharide biosynthetic process	6	3	0.00165	biological process
GO:0009071	serine family amino acid catabolic process	48	5	0.00168	biological process
GO:0009694	jasmonic acid metabolic process	107	11	0.00177	biological process
GO:0006855	drug transmembrane transport	61	9	0.00187	biological process
GO:0009816	defense response to bacterium, incompatible interaction	34	3	0.00202	biological process
GO:0015706	nitrate transport	107	14	0.00285	biological process
GO:0009753	response to jasmonic acid	268	22	0.00295	biological process
GO:0010035	response to inorganic substance	1162	108	0.00355	biological process
GO:0018022	peptidyl-lysine methylation	9	0	0.0046	biological process
GO:0009624	response to nematode	108	15	0.00502	biological process
GO:0015994	chlorophyll metabolic process	210	30	0.00537	biological process
GO:0030259	lipid glycosylation	10	1	0.00557	biological process
GO:0046416	D-amino acid metabolic process	7	1	0.00569	biological process
GO:0055082	cellular chemical homeostasis	147	13	0.0061	biological process
GO:0030001	metal ion transport	502	36	0.00638	biological process
GO:0080024	indolebutyric acid metabolic process	9	1	0.00676	biological process
GO:0072488	ammonium transmembrane transport	11	4	0.00687	biological process
GO:0016122	xanthophyll metabolic process	12	3	0.00725	biological process
GO:0005985	sucrose metabolic process	26	8	0.00727	biological process
GO:0010167	response to nitrate	108	11	0.00728	biological process
GO:0046653	tetrahydrofolate metabolic process	15	2	0.0082	biological process
GO:0042593	glucose homeostasis	7	0	0.00853	biological process
GO:0006857	oligopeptide transport	93	14	0.00877	biological process
GO:0015996	chlorophyll catabolic process	65	13	0.00885	biological process
GO:0009743	response to carbohydrate	315	33	0.00933	biological process
GO:0009757	hexose mediated signaling	6	0	0.00947	biological process
GO:0044272	sulfur compound biosynthetic process	422	34	0.00957	biological process
GO:0019252	starch biosynthetic process	182	23	0.00972	biological process
GO:0006573	valine metabolic process	11	0	0.00978	biological process
GO:0009507	chloroplast	2923	208	0.0043	cellular component
GO:0005815	microtubule organizing center	8	0	0.0102	cellular component
GO:0044434	chloroplast part	1212	103	0.0106	cellular component
GO:0030684	preribosome	6	0	0.0109	cellular component
GO:0044435	plastid part	1245	105	0.0114	cellular component
GO:0042579	microbody	211	17	0.0142	cellular component
GO:0005777	peroxisome	211	17	0.0142	cellular component
GO:0045177	apical part of cell	23	1	0.0218	cellular component
GO:0044420	extracellular matrix part	6	1	0.0236	cellular component
GO:0043667	pollen wall	6	1	0.0236	cellular component
GO:0043668	exine	6	1	0.0236	cellular component
GO:0010287	plastoglobule	56	11	0.0302	cellular component
GO:0030312	external encapsulating structure	593	33	0.0335	cellular component
GO:0005618	cell wall	587	31	0.0347	cellular component
GO:0005749	mitochondrial respiratory chain complex II	7	0	0.0411	cellular component
GO:0045257	succinate dehydrogenase complex (ubiquinone)	7	0	0.0411	cellular component
GO:0045281	succinate dehydrogenase complex	7	0	0.0411	cellular component
GO:0045283	fumarate reductase complex	7	0	0.0411	cellular component
GO:0045273	respiratory chain complex II	7	0	0.0411	cellular component
GO:0031969	chloroplast membrane	110	14	0.0435	cellular component
GO:0010277	chlorophyllide a oxygenase [overall] activity	11	3	6e-06	molecular function
GO:0016762	xyloglucan:xyloglucosyl transferase activity	28	2	1.8e-05	molecular function
GO:0010334	sesquiterpene synthase activity	12	0	2.3e-05	molecular function
GO:0016165	linoleate 13S-lipoxygenase activity	29	0	3.4e-05	molecular function
GO:0016838	carbon-oxygen lyase activity, acting on phosphates	38	1	0.00014	molecular function
GO:0008825	cyclopropane-fatty-acyl-phospholipid synthase activity	7	0	0.00028	molecular function
GO:0019239	deaminase activity	18	1	0.00131	molecular function
GO:0005315	inorganic phosphate transmembrane transporter activity	16	3	0.00205	molecular function
GO:0004553	hydrolase activity, hydrolyzing O-glycosyl compounds	384	27	0.00292	molecular function
GO:0015198	oligopeptide transporter activity	28	3	0.00337	molecular function
GO:0016621	cinnamoyl-CoA reductase activity	12	2	0.00338	molecular function
GO:0051082	unfolded protein binding	88	9	0.00417	molecular function
GO:0015081	sodium ion transmembrane transporter activity	29	3	0.00472	molecular function
GO:0015296	anion:cation symporter activity	11	2	0.00586	molecular function
GO:0022804	active transmembrane transporter activity	521	51	0.00643	molecular function
GO:0008519	ammonium transmembrane transporter activity	11	4	0.0067	molecular function
GO:0000036	ACP phosphopantetheine attachment site binding involved in fatty acid biosynthetic process	6	0	0.00672	molecular function
GO:0010333	terpene synthase activity	23	0	0.00732	molecular function
GO:0015203	polyamine transmembrane transporter activity	10	2	0.00756	molecular function
GO:0043531	ADP binding	44	3	0.00892	molecular function
GO:0016408	C-acyltransferase activity	13	1	0.00957	molecular function
GO:0050378	UDP-glucuronate 4-epimerase activity	6	0	0.00991	molecular function
