# Supplementary material for: Comparative transcriptomic analyses of powdery mildew resistant and susceptible cultivated cucumber ( Cucumis sativus L.) varieties to identify the genes involved in the resistance to Sphaerotheca fuliginea infection
Source: PeerJ journal article supplement (doi:10.7717/peerj.8250), 2020-04-17
Supplement: Table_S8.xlsx [file Table_S8.xlsx]

## Sheet: Sheet1
Table S8 The GO enrichment analysisof the DEGs in the RT vs RC comparison.
GO.ID	Term	Annotated	Significant	P value
GO:0031408	oxylipin biosynthetic process	47	2	1.8e-07	biological process
GO:0010338	leaf formation	6	2	8.2e-05	biological process
GO:0051762	sesquiterpene biosynthetic process	10	0	0.00015	biological process
GO:0006268	DNA unwinding involved in DNA replication	8	6	0.00038	biological process
GO:0042401	cellular biogenic amine biosynthetic process	38	0	0.0018	biological process
GO:0019252	starch biosynthetic process	182	24	0.002	biological process
GO:0006270	DNA replication initiation	62	17	0.00217	biological process
GO:0006814	sodium ion transport	35	4	0.00252	biological process
GO:0009693	ethylene biosynthetic process	64	6	0.00254	biological process
GO:0009733	response to auxin	323	24	0.00274	biological process
GO:0071281	cellular response to iron ion	9	1	0.0035	biological process
GO:0048439	flower morphogenesis	57	8	0.00351	biological process
GO:0009071	serine family amino acid catabolic process	48	1	0.00433	biological process
GO:0007049	cell cycle	879	69	0.00455	biological process
GO:0009737	response to abscisic acid	497	40	0.00487	biological process
GO:0051052	regulation of DNA metabolic process	151	21	0.00495	biological process
GO:0018022	peptidyl-lysine methylation	9	1	0.00496	biological process
GO:0030001	metal ion transport	502	36	0.00573	biological process
GO:0046416	D-amino acid metabolic process	7	0	0.00633	biological process
GO:0010051	xylem and phloem pattern formation	93	10	0.00634	biological process
GO:0008283	cell proliferation	195	31	0.00664	biological process
GO:0072488	ammonium transmembrane transport	11	3	0.00725	biological process
GO:0006760	folic acid-containing compound metabolic process	39	2	0.0074	biological process
GO:0051276	chromosome organization	706	65	0.00749	biological process
GO:0048449	floral organ formation	132	11	0.00767	biological process
GO:0009294	DNA mediated transformation	26	5	0.00768	biological process
GO:0042593	glucose homeostasis	7	0	0.00891	biological process
GO:0009118	regulation of nucleoside metabolic process	41	2	0.00911	biological process
GO:1900542	regulation of purine nucleotide metabolic process	41	2	0.00911	biological process
GO:0016569	covalent chromatin modification	371	41	0.00968	biological process
GO:0042555	MCM complex	7	7	2.7e-06	cellular component
GO:0005618	cell wall	587	57	9.9e-05	cellular component
GO:0046658	anchored component of plasma membrane	53	11	0.002	cellular component
GO:0005730	nucleolus	366	43	0.0067	cellular component
GO:0098590	plasma membrane region	18	5	0.0094	cellular component
GO:0016762	xyloglucan:xyloglucosyl transferase activity	28	2	2.2e-05	molecular function
GO:0010334	sesquiterpene synthase activity	12	0	2.5e-05	molecular function
GO:0016165	linoleate 13S-lipoxygenase activity	29	1	3.9e-05	molecular function
GO:0010277	chlorophyllide a oxygenase [overall] activity	11	1	0.0001	molecular function
GO:0016838	carbon-oxygen lyase activity, acting on phosphates	38	1	0.00015	molecular function
GO:0019239	deaminase activity	18	1	0.00023	molecular function
GO:0008825	cyclopropane-fatty-acyl-phospholipid synthase activity	7	0	0.00029	molecular function
GO:0004645	phosphorylase activity	9	2	0.00177	molecular function
GO:0005315	inorganic phosphate transmembrane transporter activity	16	2	0.00216	molecular function
GO:0016746	transferase activity, transferring acyl groups	280	23	0.00298	molecular function
GO:0015198	oligopeptide transporter activity	28	3	0.00379	molecular function
GO:0046873	metal ion transmembrane transporter activity	191	14	0.0045	molecular function
GO:0016730	oxidoreductase activity, acting on iron-sulfur proteins as donors	9	1	0.00455	molecular function
GO:0004553	hydrolase activity, hydrolyzing O-glycosyl compounds	384	31	0.00521	molecular function
GO:0004028	3-chloroallyl aldehyde dehydrogenase activity	13	5	0.00531	molecular function
GO:0045551	cinnamyl-alcohol dehydrogenase activity	7	4	0.00543	molecular function
GO:0016857	racemase and epimerase activity, acting on carbohydrates and derivatives	26	1	0.00663	molecular function
GO:0008519	ammonium transmembrane transporter activity	11	3	0.00695	molecular function
GO:0000036	ACP phosphopantetheine attachment site binding involved in fatty acid biosynthetic process	6	1	0.00699	molecular function
GO:0004867	serine-type endopeptidase inhibitor activity	9	1	0.00742	molecular function
GO:0010333	terpene synthase activity	23	0	0.00769	molecular function
GO:0016836	hydro-lyase activity	82	7	0.00772	molecular function
GO:0042973	glucan endo-1,3-beta-D-glucosidase activity	26	5	0.00933	molecular function
GO:0015203	polyamine transmembrane transporter activity	10	2	0.00994	molecular function
