# Supplementary material for: Comparative transcriptomic analyses of powdery mildew resistant and susceptible cultivated cucumber ( Cucumis sativus L.) varieties to identify the genes involved in the resistance to Sphaerotheca fuliginea infection
Source: PeerJ journal article supplement (doi:10.7717/peerj.8250), 2020-04-17
Supplement: Table_S9.xlsx [file Table_S9.xlsx]

## Sheet: Sheet1
Table S9 The difference P value of each KEGG pathway in the ST vs SC comparison.
#Kegg_pathway	ko_id	P values
Flavonoid biosynthesis	ko00941	0.000434602
DNA replication	ko03030	0.000538522
Circadian rhythm - plant	ko04712	0.000671141
Ribosome	ko03010	0.0017576
Limonene and pinene degradation	ko00903	0.0147185
Biosynthesis of unsaturated fatty acids	ko01040	0.0148294
Stilbenoid, diarylheptanoid and gingerol biosynthesis	ko00945	0.031207
Ascorbate and aldarate metabolism	ko00053	0.0338695
Phenylpropanoid biosynthesis	ko00940	0.0396039
Glycolysis / Gluconeogenesis	ko00010	0.0438489
Pentose and glucuronate interconversions	ko00040	0.0536098
Fatty acid metabolism	ko01212	0.059534
Flavone and flavonol biosynthesis	ko00944	0.061626
Cutin, suberine and wax biosynthesis	ko00073	0.0722978
Mismatch repair	ko03430	0.0742174
Pyruvate metabolism	ko00620	0.111204
Porphyrin and chlorophyll metabolism	ko00860	0.113478
Zeatin biosynthesis	ko00908	0.135761
beta-Alanine metabolism	ko00410	0.140966
Fatty acid elongation	ko00062	0.150439
Plant-pathogen interaction	ko04626	0.175712
Plant hormone signal transduction	ko04075	0.189989
Protein processing in endoplasmic reticulum	ko04141	0.199794
Ubiquinone and other terpenoid-quinone biosynthesis	ko00130	0.204057
Biotin metabolism	ko00780	0.23533
One carbon pool by folate	ko00670	0.23533
Isoquinoline alkaloid biosynthesis	ko00950	0.25875
Selenocompound metabolism	ko00450	0.282197
Histidine metabolism	ko00340	0.282197
Phenylalanine, tyrosine and tryptophan biosynthesis	ko00400	0.285895
Other glycan degradation	ko00511	0.305581
Linoleic acid metabolism	ko00591	0.314254
Carotenoid biosynthesis	ko00906	0.31532
Carbon metabolism	ko01200	0.318955
Ubiquitin mediated proteolysis	ko04120	0.319288
Photosynthesis - antenna proteins	ko00196	0.328819
Biosynthesis of amino acids	ko01230	0.3457
Tropane, piperidine and pyridine alkaloid biosynthesis	ko00960	0.351842
Monoterpenoid biosynthesis	ko00902	0.359543
alpha-Linolenic acid metabolism	ko00592	0.359631
Glycerolipid metabolism	ko00561	0.371515
Phenylalanine metabolism	ko00360	0.372905
Endocytosis	ko04144	0.395444
Starch and sucrose metabolism	ko00500	0.398413
Nitrogen metabolism	ko00910	0.401283
Cysteine and methionine metabolism	ko00270	0.427367
Glycine, serine and threonine metabolism	ko00260	0.434547
Lysine degradation	ko00310	0.440664
Steroid biosynthesis	ko00100	0.440664
Vitamin B6 metabolism	ko00750	0.503678
Sulfur relay system	ko04122	0.503678
Thiamine metabolism	ko00730	0.503678
Nucleotide excision repair	ko03420	0.510956
Pentose phosphate pathway	ko00030	0.515591
Ether lipid metabolism	ko00565	0.522438
Tryptophan metabolism	ko00380	0.541601
Citrate cycle (TCA cycle)	ko00020	0.575483
Photosynthesis	ko00195	0.575483
Homologous recombination	ko03440	0.575483
Sesquiterpenoid and triterpenoid biosynthesis	ko00909	0.590129
Arachidonic acid metabolism	ko00590	0.590129
Sulfur metabolism	ko00920	0.612822
Degradation of aromatic compounds	ko01220	0.615472
Tyrosine metabolism	ko00350	0.645144
Purine metabolism	ko00230	0.656714
Glyoxylate and dicarboxylate metabolism	ko00630	0.668512
Fatty acid biosynthesis	ko00061	0.675303
Galactose metabolism	ko00052	0.680515
Amino sugar and nucleotide sugar metabolism	ko00520	0.681019
Arginine and proline metabolism	ko00330	0.688534
Valine, leucine and isoleucine degradation	ko00280	0.689587
Fatty acid degradation	ko00071	0.689587
Folate biosynthesis	ko00790	0.720597
Glutathione metabolism	ko00480	0.736497
Butanoate metabolism	ko00650	0.754131
Glycerophospholipid metabolism	ko00564	0.770712
Cyanoamino acid metabolism	ko00460	0.783117
Inositol phosphate metabolism	ko00562	0.791712
Carbon fixation in photosynthetic organisms	ko00710	0.791712
Propanoate metabolism	ko00640	0.809643
Sphingolipid metabolism	ko00600	0.832521
Pyrimidine metabolism	ko00240	0.835984
Diterpenoid biosynthesis	ko00904	0.893066
Base excision repair	ko03410	0.917278
Basal transcription factors	ko03022	0.922423
Spliceosome	ko03040	0.924428
SNARE interactions in vesicular transport	ko04130	0.92725
RNA polymerase	ko03020	0.943743
Peroxisome	ko04146	0.951162
Proteasome	ko03050	0.953617
Fructose and mannose metabolism	ko00051	0.95922
Alanine, aspartate and glutamate metabolism	ko00250	0.961763
2-Oxocarboxylic acid metabolism	ko01210	0.972296
Phosphatidylinositol signaling system	ko04070	0.975648
Phagosome	ko04145	0.986383
Ribosome biogenesis in eukaryotes	ko03008	0.995171
RNA degradation	ko03018	0.998179
mRNA surveillance pathway	ko03015	0.998847
Oxidative phosphorylation	ko00190	0.999168
RNA transport	ko03013	0.999528
