# Supplementary material for: Comparative transcriptomic analyses of powdery mildew resistant and susceptible cultivated cucumber ( Cucumis sativus L.) varieties to identify the genes involved in the resistance to Sphaerotheca fuliginea infection
Source: PeerJ journal article supplement (doi:10.7717/peerj.8250), 2020-04-17
Supplement: Table_S10.xlsx [file Table_S10.xlsx]

## Sheet: Sheet1
Table S10 The difference P value of each KEGG pathway in the RT vs RC comparison.
#Kegg_pathway	ko_id	P-value
Carbon fixation in photosynthetic organisms	ko00710	0.000407648
Carbon metabolism	ko01200	0.000704462
Alanine, aspartate and glutamate metabolism	ko00250	0.000800191
Porphyrin and chlorophyll metabolism	ko00860	0.000926388
Peroxisome	ko04146	0.00109216
Starch and sucrose metabolism	ko00500	0.00133148
Galactose metabolism	ko00052	0.00160317
Glycine, serine and threonine metabolism	ko00260	0.00224371
Protein processing in endoplasmic reticulum	ko04141	0.00286263
Glyoxylate and dicarboxylate metabolism	ko00630	0.00546447
Phenylpropanoid biosynthesis	ko00940	0.00595617
Taurine and hypotaurine metabolism	ko00430	0.015099
Thiamine metabolism	ko00730	0.015099
Carotenoid biosynthesis	ko00906	0.0199149
Pentose phosphate pathway	ko00030	0.0209515
Butanoate metabolism	ko00650	0.0218635
Nicotinate and nicotinamide metabolism	ko00760	0.0359374
Cutin, suberine and wax biosynthesis	ko00073	0.0382671
Biosynthesis of unsaturated fatty acids	ko01040	0.0613396
Stilbenoid, diarylheptanoid and gingerol biosynthesis	ko00945	0.0750795
Sulfur metabolism	ko00920	0.0800931
Circadian rhythm - plant	ko04712	0.0800931
Pyruvate metabolism	ko00620	0.0982563
Vitamin B6 metabolism	ko00750	0.10173
Fructose and mannose metabolism	ko00051	0.102475
Terpenoid backbone biosynthesis	ko00900	0.109254
Cyanoamino acid metabolism	ko00460	0.110268
Flavonoid biosynthesis	ko00941	0.115482
Ubiquinone and other terpenoid-quinone biosynthesis	ko00130	0.119572
Sesquiterpenoid and triterpenoid biosynthesis	ko00909	0.152839
One carbon pool by folate	ko00670	0.170824
beta-Alanine metabolism	ko00410	0.185854
Glycolysis / Gluconeogenesis	ko00010	0.202571
alpha-Linolenic acid metabolism	ko00592	0.2146
Fatty acid metabolism	ko01212	0.217382
Synthesis and degradation of ketone bodies	ko00072	0.226364
Diterpenoid biosynthesis	ko00904	0.254006
Phenylalanine metabolism	ko00360	0.294141
Valine, leucine and isoleucine degradation	ko00280	0.295451
Fatty acid elongation	ko00062	0.301996
Plant-pathogen interaction	ko04626	0.360384
Limonene and pinene degradation	ko00903	0.370105
Biosynthesis of amino acids	ko01230	0.389441
Glycerophospholipid metabolism	ko00564	0.41164
Tryptophan metabolism	ko00380	0.42982
Sulfur relay system	ko04122	0.431669
Inositol phosphate metabolism	ko00562	0.433356
Citrate cycle (TCA cycle)	ko00020	0.433645
Arachidonic acid metabolism	ko00590	0.512965
Regulation of autophagy	ko04140	0.529016
2-Oxocarboxylic acid metabolism	ko01210	0.536834
Isoquinoline alkaloid biosynthesis	ko00950	0.560621
Fatty acid degradation	ko00071	0.574067
Selenocompound metabolism	ko00450	0.582679
Ascorbate and aldarate metabolism	ko00053	0.602324
Other glycan degradation	ko00511	0.603634
Glycosaminoglycan degradation	ko00531	0.623542
Tropane, piperidine and pyridine alkaloid biosynthesis	ko00960	0.642455
Folate biosynthesis	ko00790	0.642455
Phenylalanine, tyrosine and tryptophan biosynthesis	ko00400	0.654556
Zeatin biosynthesis	ko00908	0.660422
Photosynthesis	ko00195	0.701195
Lysine degradation	ko00310	0.709106
Steroid biosynthesis	ko00100	0.709106
Glycerolipid metabolism	ko00561	0.722496
Arginine and proline metabolism	ko00330	0.733046
Plant hormone signal transduction	ko04075	0.746663
Sphingolipid metabolism	ko00600	0.76338
Ether lipid metabolism	ko00565	0.76338
Glutathione metabolism	ko00480	0.772285
Cysteine and methionine metabolism	ko00270	0.806704
Tyrosine metabolism	ko00350	0.835224
Nitrogen metabolism	ko00910	0.851426
Spliceosome	ko03040	0.895785
Pentose and glucuronate interconversions	ko00040	0.900205
Ubiquitin mediated proteolysis	ko04120	0.903761
Linoleic acid metabolism	ko00591	0.906806
Amino sugar and nucleotide sugar metabolism	ko00520	0.919887
Endocytosis	ko04144	0.928343
Phosphatidylinositol signaling system	ko04070	0.950041
RNA degradation	ko03018	0.961215
Oxidative phosphorylation	ko00190	0.977192
Pyrimidine metabolism	ko00240	0.980061
Ribosome biogenesis in eukaryotes	ko03008	0.986451
Purine metabolism	ko00230	0.999397
RNA transport	ko03013	0.999714
Ribosome	ko03010	1
