# Supplementary material for: Comparative transcriptomic analyses of powdery mildew resistant and susceptible cultivated cucumber ( Cucumis sativus L.) varieties to identify the genes involved in the resistance to Sphaerotheca fuliginea infection
Source: PeerJ journal article supplement (doi:10.7717/peerj.8250), 2020-04-17
Supplement: Table_S11.xlsx [file Table_S11.xlsx]

## Sheet: Sheet1
Table S11 All the primer sequences of RT-PCR.
Gene ID	Name	RT-UP	RT-DOWN
Csa3G119760	GH3	GTCGGCTGAGTACTTGCAGA	GTCGTCTCCAACAATTCATC
Csa2G373410	AHP	GTGAATCTTAGCATTCACGT	CTCTATACTCACATGGTTTG
Csa4G653480	BSK	GCAAATTTCATATGCAATGG	GTTTTCTCTCAATTTCCATC
Cucumber_newGene_1053	PR1	GTGGTTGGAAGGTTCATCCA	GAACGTGAGTGTTTATGACC
Csa2G020890.new4	NBS	GAACAATTCCTAAGTCAGTT	ATGTGAGGTAGCTTGGAAGC
Csa1G599520	peroxidase	CAACCTATTCCACTGAGAAG	CTAAGCGCCGAATCACTAAG
Csa5G567300	glucanase	GTTACTAAAAATAAACTTTG	AGTTTTGGAAACTTGAGTTC
Csa3G166220.new1	chitinase	GCAAAACTACTTGTTAGTTT	CACCAATCAACAGTGGGATG
EF446145	EF1a	GACCACCAAGTACTACTGCA	TTGAGGTATGATGAGACTTC
