# Supplementary figures and images for: Comparative transcriptomic analyses of powdery mildew resistant and susceptible cultivated cucumber ( Cucumis sativus L.) varieties to identify the genes involved in the resistance to Sphaerotheca fuliginea infection
Source: PeerJ journal article supplement (doi:10.7717/peerj.8250), 2020-04-17

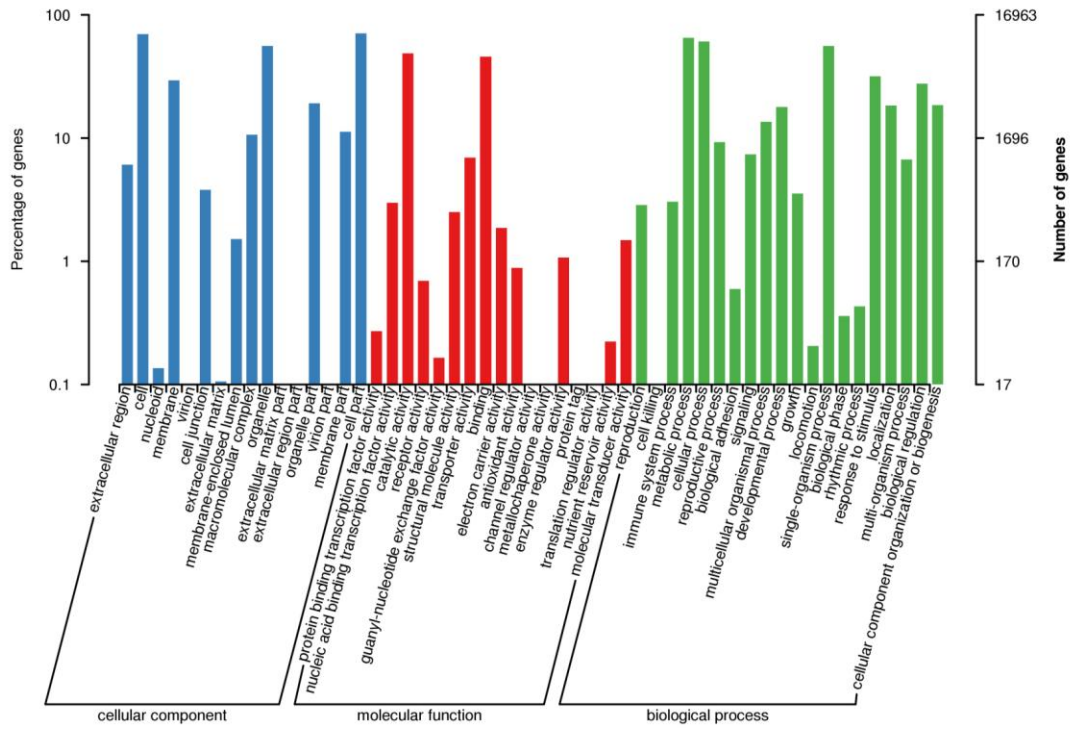

S1 Figure GO classifications of all identified genes.

Supplement: S1_Figure.pdf [file S1_Figure.pdf]

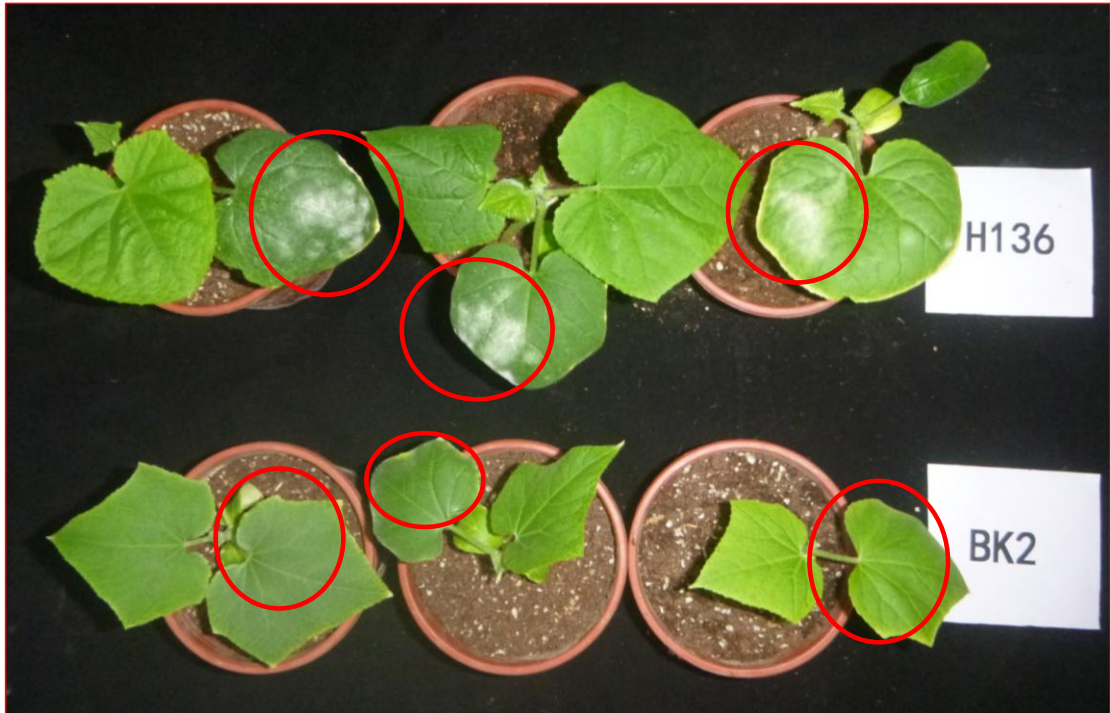

Figure S2 The infected morphological results of H136 and BK2.

Supplement: S2_Figure.pdf [file S2_Figure.pdf]
